# Supplementary material for: Switchable regioselectivity in amine-catalysed asymmetric cycloadditions
Source: Springer Nature journal article supplement (doi:10.1038/nchem.2698), 2017-01-16
Supplement: 41557_2017_BFnchem2698_MOESM23_ESM.cif [file 41557_2017_BFnchem2698_MOESM23_ESM.cif]

data_3b
_audit_creation_date              2015-05-09
_audit_creation_method
;
Olex2 1.2
(compiled 2014.07.22 svn.r2960 for OlexSys, GUI svn.r4862)
;
_shelxl_version_number            2014-1
_publ_contact_author_address      ?
_publ_contact_author_email        ?
_publ_contact_author_name         ''
_publ_contact_author_phone        ?
_publ_section_references
;
Dolomanov, O.V., Bourhis, L.J., Gildea, R.J, Howard, J.A.K. & Puschmann, H.
 (2009), J. Appl. Cryst. 42, 339-341.

Sheldrick, G.M. (2008). Acta Cryst. A64, 112-122.
;
_chemical_name_common             ?
_chemical_name_systematic
;
 ?
;
_chemical_formula_moiety          'C28 H22 N2 O3'
_chemical_formula_sum             'C28 H22 N2 O3'
_chemical_formula_weight          434.47
_chemical_absolute_configuration  rm
_chemical_melting_point           ?
_chemical_oxdiff_formula          'C1 H1 N1 O1 N1'
loop_
  _atom_type_symbol
  _atom_type_description
  _atom_type_scat_dispersion_real
  _atom_type_scat_dispersion_imag
  _atom_type_scat_source
 'C' 'C' 0.0181 0.0091 'International Tables Vol C Tables 4.2.6.8 and 6.1.1.4'
 'H' 'H' 0.0000 0.0000 'International Tables Vol C Tables 4.2.6.8 and 6.1.1.4'
 'N' 'N' 0.0311 0.0180 'International Tables Vol C Tables 4.2.6.8 and 6.1.1.4'
 'O' 'O' 0.0492 0.0322 'International Tables Vol C Tables 4.2.6.8 and 6.1.1.4'

_shelx_space_group_comment
;
The symmetry employed for this shelxl refinement is uniquely defined
by the following loop, which should always be used as a source of
symmetry information in preference to the above space-group names.
They are only intended as comments.
;
_space_group_crystal_system       'monoclinic'
_space_group_IT_number            4
_space_group_name_H-M_alt         'P 1 21 1'
_space_group_name_Hall            'P 2yb'
loop_
  _space_group_symop_operation_xyz
 'x, y, z'
 '-x, y+1/2, -z'

_cell_length_a                    8.72405(13)
_cell_length_b                    12.40698(17)
_cell_length_c                    10.56285(13)
_cell_angle_alpha                 90
_cell_angle_beta                  91.0399(13)
_cell_angle_gamma                 90
_cell_volume                      1143.13(3)
_cell_formula_units_Z             2
_cell_measurement_reflns_used     6944
_cell_measurement_temperature     290.23(10)
_cell_measurement_theta_max       71.3440
_cell_measurement_theta_min       5.0570
_shelx_estimated_absorpt_T_max    ?
_shelx_estimated_absorpt_T_min    ?
_exptl_absorpt_coefficient_mu     0.663
_exptl_absorpt_correction_T_max   1.00000
_exptl_absorpt_correction_T_min   0.55398
_exptl_absorpt_correction_type    multi-scan
_exptl_absorpt_process_details
;
CrysAlisPro, Agilent Technologies,
Version 1.171.37.34 (release 22-05-2014 CrysAlis171 .NET)
(compiled May 22 2014,16:03:01)
Empirical absorption correction using spherical harmonics,
 implemented in SCALE3 ABSPACK scaling algorithm.
;
_exptl_crystal_colour             'clear light colourless'
_exptl_crystal_colour_lustre      clear
_exptl_crystal_colour_modifier    light
_exptl_crystal_colour_primary     colourless
_exptl_crystal_density_diffrn     1.262
_exptl_crystal_density_meas       ?
_exptl_crystal_density_method     ?
_exptl_crystal_description        block
_exptl_crystal_F_000              456
_exptl_crystal_size_max           0.15
_exptl_crystal_size_mid           0.14
_exptl_crystal_size_min           0.13
_exptl_special_details
;
 ?
;
_exptl_transmission_factor_max    ?
_exptl_transmission_factor_min    ?
_diffrn_reflns_av_R_equivalents   0.0211
_diffrn_reflns_av_unetI/netI      0.0202
_diffrn_reflns_Laue_measured_fraction_full 0.999
_diffrn_reflns_Laue_measured_fraction_max 0.983
_diffrn_reflns_limit_h_max        7
_diffrn_reflns_limit_h_min        -10
_diffrn_reflns_limit_k_max        14
_diffrn_reflns_limit_k_min        -15
_diffrn_reflns_limit_l_max        12
_diffrn_reflns_limit_l_min        -12
_diffrn_reflns_number             8886
_diffrn_reflns_point_group_measured_fraction_full 0.923
_diffrn_reflns_point_group_measured_fraction_max 0.895
_diffrn_reflns_theta_full         67.684
_diffrn_reflns_theta_max          71.414
_diffrn_reflns_theta_min          5.071
_diffrn_ambient_environment       air
_diffrn_ambient_temperature       290.23(10)
_diffrn_detector                  'CCD plate'
_diffrn_detector_area_resol_mean  8.0243
_diffrn_detector_type             EosS2
_diffrn_measured_fraction_theta_full 0.999
_diffrn_measured_fraction_theta_max 0.983
_diffrn_measurement_details
;
#__ type_ start__ end____ width___ exp.time_
  1 omega   18.00  106.00   1.0000    1.0000
omega____ theta____ kappa____ phi______ frames
    -       36.7203   38.0000 -180.0000 88

#__ type_ start__ end____ width___ exp.time_
  2 omega  -31.00   53.00   1.0000    1.0000
omega____ theta____ kappa____ phi______ frames
    -       36.7203  -57.0000   30.0000 84

#__ type_ start__ end____ width___ exp.time_
  3 omega    1.00   76.00   1.0000    1.0000
omega____ theta____ kappa____ phi______ frames
    -       36.7203  -99.0000  150.0000 75

#__ type_ start__ end____ width___ exp.time_
  4 omega   10.00  104.00   1.0000    1.0000
omega____ theta____ kappa____ phi______ frames
    -       36.7203   77.0000 -150.0000 94

#__ type_ start__ end____ width___ exp.time_
  5 omega   10.00  104.00   1.0000    1.0000
omega____ theta____ kappa____ phi______ frames
    -       36.7203   77.0000 -120.0000 94

#__ type_ start__ end____ width___ exp.time_
  6 omega   36.00  105.00   1.0000    1.0000
omega____ theta____ kappa____ phi______ frames
    -       36.7203 -149.0000   88.0000 69

#__ type_ start__ end____ width___ exp.time_
  7 omega   38.00   91.00   1.0000    9.0000
omega____ theta____ kappa____ phi______ frames
    -      108.0000  -30.0000   30.0000 53

#__ type_ start__ end____ width___ exp.time_
  8 omega   38.00   91.00   1.0000    9.0000
omega____ theta____ kappa____ phi______ frames
    -      108.0000  -30.0000   90.0000 53

#__ type_ start__ end____ width___ exp.time_
  9 omega   38.00   91.00   1.0000    9.0000
omega____ theta____ kappa____ phi______ frames
    -      108.0000  -30.0000  -30.0000 53

#__ type_ start__ end____ width___ exp.time_
 10 omega   39.00  110.00   1.0000    9.0000
omega____ theta____ kappa____ phi______ frames
    -      108.0000  -95.0000  -60.0000 71

#__ type_ start__ end____ width___ exp.time_
 11 omega   91.00  176.00   1.0000    9.0000
omega____ theta____ kappa____ phi______ frames
    -      108.0000   45.0000 -150.0000 85

#__ type_ start__ end____ width___ exp.time_
 12 omega   38.00  116.00   1.0000    9.0000
omega____ theta____ kappa____ phi______ frames
    -      108.0000 -112.0000 -150.0000 78

#__ type_ start__ end____ width___ exp.time_
 13 omega   38.00   91.00   1.0000    9.0000
omega____ theta____ kappa____ phi______ frames
    -      108.0000  -30.0000  120.0000 53

#__ type_ start__ end____ width___ exp.time_
 14 omega   40.00   98.00   1.0000    9.0000
omega____ theta____ kappa____ phi______ frames
    -      108.0000  -45.0000  -60.0000 58

#__ type_ start__ end____ width___ exp.time_
 15 omega  101.00  178.00   1.0000    9.0000
omega____ theta____ kappa____ phi______ frames
    -      108.0000  112.0000   90.0000 77

#__ type_ start__ end____ width___ exp.time_
 16 omega  101.00  178.00   1.0000    9.0000
omega____ theta____ kappa____ phi______ frames
    -      108.0000  112.0000  -90.0000 77

#__ type_ start__ end____ width___ exp.time_
 17 omega   18.00  106.00   1.0000    1.0000
omega____ theta____ kappa____ phi______ frames
    -       36.7203   38.0000    0.0000 88

#__ type_ start__ end____ width___ exp.time_
 18 omega   20.00  104.00   1.0000    1.0000
omega____ theta____ kappa____ phi______ frames
    -       36.7203   57.0000   60.0000 84

#__ type_ start__ end____ width___ exp.time_
 19 omega   10.00  104.00   1.0000    1.0000
omega____ theta____ kappa____ phi______ frames
    -       36.7203   77.0000   90.0000 94

#__ type_ start__ end____ width___ exp.time_
 20 omega  -31.00   53.00   1.0000    1.0000
omega____ theta____ kappa____ phi______ frames
    -       36.7203  -57.0000 -180.0000 84

#__ type_ start__ end____ width___ exp.time_
 21 omega  -31.00   53.00   1.0000    1.0000
omega____ theta____ kappa____ phi______ frames
    -       36.7203  -57.0000 -120.0000 84

#__ type_ start__ end____ width___ exp.time_
 22 omega   87.00  172.00   1.0000    9.0000
omega____ theta____ kappa____ phi______ frames
    -      108.0000   30.0000  150.0000 85

#__ type_ start__ end____ width___ exp.time_
 23 omega   87.00  178.00   1.0000    9.0000
omega____ theta____ kappa____ phi______ frames
    -      108.0000   30.0000   60.0000 91
;
_diffrn_measurement_device        'four-circle diffractometer'
_diffrn_measurement_device_type   'SuperNova, Dual, Cu at zero, EosS2'
_diffrn_measurement_method        '\w scans'
_diffrn_orient_matrix_UB_11       -0.0389600000
_diffrn_orient_matrix_UB_12       -0.0454562000
_diffrn_orient_matrix_UB_13       0.1312333000
_diffrn_orient_matrix_UB_21       0.0008415000
_diffrn_orient_matrix_UB_22       0.1150402000
_diffrn_orient_matrix_UB_23       0.0549303000
_diffrn_orient_matrix_UB_31       -0.1723079000
_diffrn_orient_matrix_UB_32       0.0108644000
_diffrn_orient_matrix_UB_33       -0.0320542000
_diffrn_radiation_monochromator   mirror
_diffrn_radiation_probe           x-ray
_diffrn_radiation_type            CuK\a
_diffrn_radiation_wavelength      1.54184
_diffrn_source                    'sealed X-ray tube'
_diffrn_source_type               'SuperNova (Cu) X-ray Source'
_reflns_Friedel_coverage          0.738
_reflns_Friedel_fraction_full     0.839
_reflns_Friedel_fraction_max      0.799
_reflns_number_gt                 3874
_reflns_number_total              3983
_reflns_odcompleteness_completeness 99.86
_reflns_odcompleteness_iscentric  1
_reflns_odcompleteness_theta      66.97
_reflns_special_details
;
 Reflections were merged by SHELXL according to the crystal
 class for the calculation of statistics and refinement.
 
 _reflns_Friedel_fraction is defined as the number of unique
 Friedel pairs measured divided by the number that would be
 possible theoretically, ignoring centric projections and
 systematic absences.
;
_reflns_threshold_expression      'I > 2\s(I)'
_computing_cell_refinement
;
CrysAlisPro, Agilent Technologies,
Version 1.171.37.34 (release 22-05-2014 CrysAlis171 .NET)
(compiled May 22 2014,16:03:01)
;
_computing_data_collection
;
CrysAlisPro, Agilent Technologies,
Version 1.171.37.34 (release 22-05-2014 CrysAlis171 .NET)
(compiled May 22 2014,16:03:01)
;
_computing_data_reduction
;
CrysAlisPro, Agilent Technologies,
Version 1.171.37.34 (release 22-05-2014 CrysAlis171 .NET)
(compiled May 22 2014,16:03:01)
;
_computing_molecular_graphics     'Olex2 (Dolomanov et al., 2009)'
_computing_publication_material   'Olex2 (Dolomanov et al., 2009)'
_computing_structure_refinement   'ShelXL (Sheldrick, 2008)'
_computing_structure_solution     'ShelXS (Sheldrick, 2008)'
_refine_diff_density_max          0.110
_refine_diff_density_min          -0.138
_refine_diff_density_rms          0.031
_refine_ls_abs_structure_details
;
 Flack x determined using 1622 quotients [(I+)-(I-)]/[(I+)+(I-)]
 (Parsons, Flack and Wagner, Acta Cryst. B69 (2013) 249-259).
;
_refine_ls_abs_structure_Flack    0.00(10)
_refine_ls_extinction_coef        .
_refine_ls_extinction_method      none
_refine_ls_goodness_of_fit_ref    1.043
_refine_ls_hydrogen_treatment     constr
_refine_ls_matrix_type            full
_refine_ls_number_parameters      299
_refine_ls_number_reflns          3983
_refine_ls_number_restraints      1
_refine_ls_R_factor_all           0.0320
_refine_ls_R_factor_gt            0.0313
_refine_ls_restrained_S_all       1.043
_refine_ls_shift/su_max           0.000
_refine_ls_shift/su_mean          0.000
_refine_ls_structure_factor_coef  Fsqd
_refine_ls_weighting_details
'w=1/[\s^2^(Fo^2^)+(0.0500P)^2^+0.0684P] where P=(Fo^2^+2Fc^2^)/3'
_refine_ls_weighting_scheme       calc
_refine_ls_wR_factor_gt           0.0831
_refine_ls_wR_factor_ref          0.0841
_refine_special_details
;
 ?
;
_olex2_refinement_description
;
1. Fixed Uiso
 At 1.2 times of:
  All C(H) groups
 At 1.5 times of:
  All C(H,H,H) groups
2.a Ternary CH refined with riding coordinates:
 C16(H16), C15(H15), C10(H10), C11(H11)
2.b Aromatic/amide H refined with riding coordinates:
 C21(H21), C4(H4), C22(H22), C19(H19), C3(H3), C18(H18), C29(H29), C12(H12),
 C20(H20), C2(H2), C33(H33), C13(H13), C30(H30), C32(H32), C31(H31)
2.c Idealised Me refined as rotating group:
 C27(H27A,H27B,H27C)
;
_atom_sites_solution_hydrogens    geom
_atom_sites_solution_primary      direct
_atom_sites_solution_secondary    ?
loop_
  _atom_site_label
  _atom_site_type_symbol
  _atom_site_fract_x
  _atom_site_fract_y
  _atom_site_fract_z
  _atom_site_U_iso_or_equiv
  _atom_site_adp_type
  _atom_site_occupancy
  _atom_site_site_symmetry_order
  _atom_site_calc_flag
  _atom_site_refinement_flags_posn
  _atom_site_refinement_flags_adp
  _atom_site_refinement_flags_occupancy
  _atom_site_disorder_assembly
  _atom_site_disorder_group
 O26 O -0.37574(18) -0.19269(13) -0.81080(15) 0.0640(4) Uani 1 1 d . . . . .
 C7 C -0.2652(2) -0.13308(15) -0.80060(17) 0.0459(4) Uani 1 1 d . . . . .
 C5 C -0.0755(2) -0.01379(14) -0.72205(19) 0.0453(4) Uani 1 1 d . . . . .
 C6 C -0.22444(19) -0.06487(13) -0.68357(15) 0.0399(4) Uani 1 1 d . . . . .
 C17 C -0.3582(2) 0.11001(16) -0.75830(17) 0.0456(4) Uani 1 1 d . . . . .
 N8 N -0.1611(2) -0.11314(14) -0.89207(15) 0.0528(4) Uani 1 1 d . . . . .
 N1 N 0.0657(2) -0.01206(19) -0.9183(2) 0.0741(6) Uani 1 1 d . . . . .
 C16 C -0.35682(19) 0.01839(15) -0.66429(16) 0.0420(4) Uani 1 1 d . . . . .
 H16 H -0.4534 -0.0209 -0.6768 0.050 Uiso 1 1 calc R . . . .
 C21 C -0.4395(3) 0.1760(3) -0.9638(2) 0.0779(8) Uani 1 1 d . . . . .
 H21 H -0.4944 0.1659 -1.0392 0.093 Uiso 1 1 calc R . . . .
 C23 C -0.0626(3) -0.17338(18) -0.5266(2) 0.0587(5) Uani 1 1 d . . . . .
 C15 C -0.3454(2) 0.04755(15) -0.52306(18) 0.0495(4) Uani 1 1 d . . . . .
 H15 H -0.2774 0.1093 -0.5080 0.059 Uiso 1 1 calc R . . . .
 O25 O -0.5842(3) 0.14425(16) -0.49115(19) 0.0876(6) Uani 1 1 d . . . . .
 C10 C -0.2226(2) -0.13061(15) -0.55756(16) 0.0469(4) Uani 1 1 d . . . . .
 H10 H -0.2927 -0.1919 -0.5673 0.056 Uiso 1 1 calc R . . . .
 C4 C 0.0294(2) 0.05215(19) -0.6631(3) 0.0642(6) Uani 1 1 d . . . . .
 H4 H 0.0192 0.0736 -0.5793 0.077 Uiso 1 1 calc R . . . .
 C11 C -0.2860(3) -0.05414(18) -0.45605(18) 0.0565(5) Uani 1 1 d . . . . .
 H11 H -0.2050 -0.0354 -0.3944 0.068 Uiso 1 1 calc R . . . .
 C22 C -0.4379(2) 0.0961(2) -0.8729(2) 0.0595(5) Uani 1 1 d . . . . .
 H22 H -0.4906 0.0321 -0.8882 0.071 Uiso 1 1 calc R . . . .
 C19 C -0.2779(3) 0.2846(2) -0.8321(3) 0.0762(7) Uani 1 1 d . . . . .
 H19 H -0.2221 0.3476 -0.8192 0.091 Uiso 1 1 calc R . . . .
 C14 C -0.5040(3) 0.06670(18) -0.4702(2) 0.0625(6) Uani 1 1 d . . . . .
 C9 C -0.0481(2) -0.04295(17) -0.8473(2) 0.0515(4) Uani 1 1 d . . . . .
 C3 C 0.1547(3) 0.0859(2) -0.7375(4) 0.0870(10) Uani 1 1 d . . . . .
 H3 H 0.2304 0.1300 -0.7023 0.104 Uiso 1 1 calc R . . . .
 O24 O 0.0074(3) -0.14612(19) -0.43176(17) 0.0908(7) Uani 1 1 d . . . . .
 C28 C 0.0109(3) -0.24420(17) -0.6222(2) 0.0586(5) Uani 1 1 d . . . . .
 C18 C -0.2778(3) 0.20522(17) -0.7390(2) 0.0581(5) Uani 1 1 d . . . . .
 H18 H -0.2235 0.2161 -0.6635 0.070 Uiso 1 1 calc R . . . .
 C29 C -0.0712(3) -0.32240(18) -0.6880(2) 0.0670(6) Uani 1 1 d . . . . .
 H29 H -0.1743 -0.3335 -0.6713 0.080 Uiso 1 1 calc R . . . .
 C12 C -0.4255(4) -0.0951(2) -0.3887(3) 0.0857(9) Uani 1 1 d . . . . .
 H12 H -0.4286 -0.1610 -0.3470 0.103 Uiso 1 1 calc R . . . .
 C20 C -0.3608(4) 0.2700(3) -0.9439(3) 0.0823(9) Uani 1 1 d . . . . .
 H20 H -0.3629 0.3239 -1.0051 0.099 Uiso 1 1 calc R . . . .
 C27 C -0.1635(4) -0.1644(3) -1.0158(2) 0.0877(9) Uani 1 1 d . . . . .
 H27A H -0.0734 -0.2080 -1.0244 0.132 Uiso 1 1 calc GR . . . .
 H27B H -0.1656 -0.1101 -1.0805 0.132 Uiso 1 1 calc GR . . . .
 H27C H -0.2531 -0.2089 -1.0242 0.132 Uiso 1 1 calc GR . . . .
 C2 C 0.1637(3) 0.0535(3) -0.8606(4) 0.0880(9) Uani 1 1 d . . . . .
 H2 H 0.2451 0.0795 -0.9074 0.106 Uiso 1 1 calc R . . . .
 C33 C 0.1652(3) -0.2288(2) -0.6473(2) 0.0679(6) Uani 1 1 d . . . . .
 H33 H 0.2215 -0.1775 -0.6020 0.081 Uiso 1 1 calc R . . . .
 C13 C -0.5427(4) -0.0281(2) -0.3950(3) 0.0879(9) Uani 1 1 d . . . . .
 H13 H -0.6366 -0.0395 -0.3569 0.105 Uiso 1 1 calc R . . . .
 C30 C 0.0012(4) -0.3843(2) -0.7793(3) 0.0824(8) Uani 1 1 d . . . . .
 H30 H -0.0530 -0.4376 -0.8228 0.099 Uiso 1 1 calc R . . . .
 C32 C 0.2352(3) -0.2898(3) -0.7398(3) 0.0814(8) Uani 1 1 d . . . . .
 H32 H 0.3380 -0.2787 -0.7577 0.098 Uiso 1 1 calc R . . . .
 C31 C 0.1524(4) -0.3664(2) -0.8046(3) 0.0866(9) Uani 1 1 d . . . . .
 H31 H 0.1996 -0.4070 -0.8668 0.104 Uiso 1 1 calc R . . . .

loop_
  _atom_site_aniso_label
  _atom_site_aniso_U_11
  _atom_site_aniso_U_22
  _atom_site_aniso_U_33
  _atom_site_aniso_U_23
  _atom_site_aniso_U_13
  _atom_site_aniso_U_12
 O26 0.0623(9) 0.0656(9) 0.0639(8) -0.0143(7) -0.0011(7) -0.0212(8)
 C7 0.0463(10) 0.0458(9) 0.0458(8) -0.0037(7) 0.0024(7) -0.0034(8)
 C5 0.0360(8) 0.0407(8) 0.0590(10) 0.0061(7) -0.0020(7) -0.0003(7)
 C6 0.0392(8) 0.0398(8) 0.0407(8) -0.0015(6) 0.0008(6) -0.0030(7)
 C17 0.0371(8) 0.0516(10) 0.0483(9) 0.0041(8) 0.0064(7) 0.0076(8)
 N8 0.0598(9) 0.0554(9) 0.0436(8) -0.0040(7) 0.0095(7) -0.0026(8)
 N1 0.0531(11) 0.0780(13) 0.0920(14) 0.0254(11) 0.0273(10) 0.0037(10)
 C16 0.0377(8) 0.0441(8) 0.0442(8) -0.0013(7) 0.0044(6) -0.0021(7)
 C21 0.0692(15) 0.105(2) 0.0598(13) 0.0248(14) 0.0016(11) 0.0188(15)
 C23 0.0692(13) 0.0549(11) 0.0520(10) 0.0078(9) -0.0024(9) 0.0098(10)
 C15 0.0608(11) 0.0431(9) 0.0447(9) -0.0032(7) 0.0051(8) 0.0000(8)
 O25 0.1015(14) 0.0783(12) 0.0843(12) 0.0048(9) 0.0337(10) 0.0378(11)
 C10 0.0553(10) 0.0428(9) 0.0427(8) 0.0023(7) 0.0048(7) 0.0007(8)
 C4 0.0482(11) 0.0519(11) 0.0919(17) 0.0021(11) -0.0154(11) -0.0071(9)
 C11 0.0725(13) 0.0543(10) 0.0428(9) 0.0013(8) 0.0066(9) 0.0096(10)
 C22 0.0445(10) 0.0808(15) 0.0532(10) 0.0088(10) 0.0005(8) 0.0059(10)
 C19 0.0900(18) 0.0507(12) 0.0890(17) 0.0132(12) 0.0343(14) 0.0078(13)
 C14 0.0780(14) 0.0560(11) 0.0541(11) -0.0048(9) 0.0188(10) 0.0123(11)
 C9 0.0448(10) 0.0503(10) 0.0597(11) 0.0123(8) 0.0119(8) 0.0058(8)
 C3 0.0448(12) 0.0675(15) 0.148(3) 0.0204(17) -0.0175(15) -0.0175(11)
 O24 0.0943(14) 0.1113(16) 0.0658(10) -0.0110(10) -0.0270(10) 0.0380(12)
 C28 0.0694(13) 0.0506(11) 0.0558(11) 0.0147(9) 0.0056(10) 0.0158(10)
 C18 0.0650(13) 0.0468(10) 0.0630(12) 0.0044(9) 0.0095(9) 0.0024(10)
 C29 0.0776(15) 0.0503(11) 0.0736(14) 0.0051(10) 0.0184(11) 0.0091(11)
 C12 0.116(2) 0.0689(14) 0.0736(15) 0.0200(12) 0.0474(16) 0.0203(16)
 C20 0.0928(19) 0.0836(18) 0.0713(15) 0.0351(14) 0.0268(14) 0.0313(16)
 C27 0.119(2) 0.0925(19) 0.0524(12) -0.0178(13) 0.0229(14) -0.0058(18)
 C2 0.0518(13) 0.090(2) 0.123(3) 0.0353(19) 0.0205(15) -0.0042(14)
 C33 0.0643(13) 0.0723(14) 0.0673(12) 0.0198(11) 0.0032(10) 0.0147(12)
 C13 0.103(2) 0.0714(16) 0.0910(18) 0.0127(14) 0.0558(16) 0.0156(16)
 C30 0.109(2) 0.0560(13) 0.0834(17) -0.0036(12) 0.0233(15) 0.0081(14)
 C32 0.0741(17) 0.0896(19) 0.0813(17) 0.0258(15) 0.0238(13) 0.0221(15)
 C31 0.105(2) 0.0736(17) 0.0829(17) 0.0082(14) 0.0396(16) 0.0229(17)

_geom_special_details
;
 All esds (except the esd in the dihedral angle between two l.s. planes)
 are estimated using the full covariance matrix.  The cell esds are taken
 into account individually in the estimation of esds in distances, angles
 and torsion angles; correlations between esds in cell parameters are only
 used when they are defined by crystal symmetry.  An approximate (isotropic)
 treatment of cell esds is used for estimating esds involving l.s. planes.
;
loop_
  _geom_bond_atom_site_label_1
  _geom_bond_atom_site_label_2
  _geom_bond_distance
  _geom_bond_site_symmetry_2
  _geom_bond_publ_flag
 O26 C7 1.218(2) . ?
 C7 C6 1.535(2) . ?
 C7 N8 1.361(2) . ?
 C5 C6 1.508(2) . ?
 C5 C4 1.369(3) . ?
 C5 C9 1.396(3) . ?
 C6 C16 1.565(2) . ?
 C6 C10 1.561(2) . ?
 C17 C16 1.509(3) . ?
 C17 C22 1.396(3) . ?
 C17 C18 1.387(3) . ?
 N8 C9 1.392(3) . ?
 N8 C27 1.453(3) . ?
 N1 C9 1.312(3) . ?
 N1 C2 1.321(4) . ?
 C16 C15 1.537(2) . ?
 C21 C22 1.381(4) . ?
 C21 C20 1.368(5) . ?
 C23 C10 1.523(3) . ?
 C23 O24 1.212(3) . ?
 C23 C28 1.491(3) . ?
 C15 C11 1.532(3) . ?
 C15 C14 1.521(3) . ?
 O25 C14 1.208(3) . ?
 C10 C11 1.542(3) . ?
 C4 C3 1.421(4) . ?
 C11 C12 1.509(4) . ?
 C19 C18 1.392(3) . ?
 C19 C20 1.385(4) . ?
 C14 C13 1.462(3) . ?
 C3 C2 1.364(5) . ?
 C28 C29 1.385(4) . ?
 C28 C33 1.390(4) . ?
 C29 C30 1.393(3) . ?
 C12 C13 1.318(4) . ?
 C33 C32 1.386(4) . ?
 C30 C31 1.369(5) . ?
 C32 C31 1.371(5) . ?

loop_
  _geom_angle_atom_site_label_1
  _geom_angle_atom_site_label_2
  _geom_angle_atom_site_label_3
  _geom_angle
  _geom_angle_site_symmetry_1
  _geom_angle_site_symmetry_3
  _geom_angle_publ_flag
 O26 C7 C6 125.29(17) . . ?
 O26 C7 N8 125.79(18) . . ?
 N8 C7 C6 108.89(15) . . ?
 C4 C5 C6 134.5(2) . . ?
 C4 C5 C9 117.5(2) . . ?
 C9 C5 C6 108.04(16) . . ?
 C7 C6 C16 107.93(14) . . ?
 C7 C6 C10 113.41(14) . . ?
 C5 C6 C7 101.72(14) . . ?
 C5 C6 C16 113.51(14) . . ?
 C5 C6 C10 117.00(15) . . ?
 C10 C6 C16 103.30(14) . . ?
 C22 C17 C16 118.37(19) . . ?
 C18 C17 C16 123.14(17) . . ?
 C18 C17 C22 118.41(19) . . ?
 C7 N8 C9 110.50(15) . . ?
 C7 N8 C27 124.1(2) . . ?
 C9 N8 C27 125.3(2) . . ?
 C9 N1 C2 113.9(3) . . ?
 C17 C16 C6 114.11(14) . . ?
 C17 C16 C15 117.45(15) . . ?
 C15 C16 C6 104.27(14) . . ?
 C20 C21 C22 120.5(2) . . ?
 O24 C23 C10 121.7(2) . . ?
 O24 C23 C28 120.5(2) . . ?
 C28 C23 C10 117.61(19) . . ?
 C11 C15 C16 105.67(15) . . ?
 C14 C15 C16 110.45(17) . . ?
 C14 C15 C11 105.15(17) . . ?
 C23 C10 C6 111.10(16) . . ?
 C23 C10 C11 113.84(16) . . ?
 C11 C10 C6 105.86(14) . . ?
 C5 C4 C3 116.1(3) . . ?
 C15 C11 C10 107.93(15) . . ?
 C12 C11 C15 103.08(19) . . ?
 C12 C11 C10 115.0(2) . . ?
 C21 C22 C17 120.8(2) . . ?
 C20 C19 C18 120.2(3) . . ?
 O25 C14 C15 125.9(2) . . ?
 O25 C14 C13 127.0(2) . . ?
 C13 C14 C15 107.12(19) . . ?
 N8 C9 C5 110.59(16) . . ?
 N1 C9 C5 127.6(2) . . ?
 N1 C9 N8 121.8(2) . . ?
 C2 C3 C4 119.9(2) . . ?
 C29 C28 C23 121.8(2) . . ?
 C29 C28 C33 119.6(2) . . ?
 C33 C28 C23 118.5(2) . . ?
 C17 C18 C19 120.3(2) . . ?
 C28 C29 C30 119.8(3) . . ?
 C13 C12 C11 113.3(2) . . ?
 C21 C20 C19 119.7(2) . . ?
 N1 C2 C3 125.0(2) . . ?
 C32 C33 C28 120.0(3) . . ?
 C12 C13 C14 110.4(2) . . ?
 C31 C30 C29 119.8(3) . . ?
 C31 C32 C33 119.7(3) . . ?
 C30 C31 C32 121.1(3) . . ?

_shelx_res_file
;
TITL cyc150509_zz in P21 #4
CELL 1.54184 8.724055 12.40698 10.562849 90 91.0399 90
ZERR 2 0.000127 0.000167 0.000132 0 0.0013 0
LATT -1
SYMM -X,0.5+Y,-Z

SFAC C H N O
UNIT 56 44 4 6

L.S. 28
PLAN  20
REM reset to P21 #4
BOND
fmap 2
acta
REM <HKL>D:/data/cyc150509_zz/struct/olex2_cyc150509_zz/cyc150509_zz.hkl</HKL>

WGHT    0.050000    0.068400
FVAR      10.59561
O26   4   -0.375744   -0.192693   -0.810798    11.00000    0.06231    0.06562 =
         0.06394   -0.01426   -0.00105   -0.02118
C7    1   -0.265245   -0.133076   -0.800597    11.00000    0.04626    0.04582 =
         0.04582   -0.00371    0.00236   -0.00344
C5    1   -0.075536   -0.013789   -0.722045    11.00000    0.03605    0.04070 =
         0.05899    0.00613   -0.00196   -0.00027
C6    1   -0.224442   -0.064868   -0.683571    11.00000    0.03917    0.03976 =
         0.04068   -0.00145    0.00084   -0.00303
C17   1   -0.358206    0.110011   -0.758304    11.00000    0.03705    0.05160 =
         0.04835    0.00409    0.00640    0.00761
N8    3   -0.161143   -0.113139   -0.892071    11.00000    0.05979    0.05538 =
         0.04359   -0.00400    0.00950   -0.00259
N1    3    0.065677   -0.012062   -0.918319    11.00000    0.05314    0.07802 =
         0.09201    0.02544    0.02729    0.00369
C16   1   -0.356819    0.018388   -0.664292    11.00000    0.03775    0.04407 =
         0.04419   -0.00132    0.00444   -0.00205
AFIX  13
H16   2   -0.453381   -0.020871   -0.676827    11.00000   -1.20000
AFIX   0
C21   1   -0.439479    0.176022   -0.963832    11.00000    0.06921    0.10468 =
         0.05982    0.02483    0.00163    0.01876
AFIX  43
H21   2   -0.494439    0.165891   -1.039157    11.00000   -1.20000
AFIX   0
C23   1   -0.062583   -0.173378   -0.526635    11.00000    0.06915    0.05485 =
         0.05196    0.00779   -0.00242    0.00984
C15   1   -0.345357    0.047547   -0.523062    11.00000    0.06084    0.04310 =
         0.04468   -0.00324    0.00514    0.00002
AFIX  13
H15   2   -0.277394    0.109296   -0.507987    11.00000   -1.20000
AFIX   0
O25   4   -0.584236    0.144252   -0.491147    11.00000    0.10153    0.07830 =
         0.08427    0.00483    0.03368    0.03779
C10   1   -0.222611   -0.130608   -0.557564    11.00000    0.05526    0.04281 =
         0.04273    0.00235    0.00483    0.00073
AFIX  13
H10   2   -0.292671   -0.191915   -0.567288    11.00000   -1.20000
AFIX   0
C4    1    0.029365    0.052155   -0.663127    11.00000    0.04822    0.05192 =
         0.09193    0.00215   -0.01543   -0.00713
AFIX  43
H4    2    0.019204    0.073605   -0.579335    11.00000   -1.20000
AFIX   0
C11   1   -0.286016   -0.054144   -0.456054    11.00000    0.07253    0.05429 =
         0.04277    0.00130    0.00655    0.00959
AFIX  13
H11   2   -0.205040   -0.035383   -0.394418    11.00000   -1.20000
AFIX   0
C22   1   -0.437892    0.096065   -0.872915    11.00000    0.04454    0.08083 =
         0.05316    0.00880    0.00051    0.00590
AFIX  43
H22   2   -0.490595    0.032090   -0.888233    11.00000   -1.20000
AFIX   0
C19   1   -0.277871    0.284591   -0.832115    11.00000    0.08998    0.05074 =
         0.08897    0.01319    0.03426    0.00781
AFIX  43
H19   2   -0.222058    0.347631   -0.819246    11.00000   -1.20000
AFIX   0
C14   1   -0.504032    0.066702   -0.470240    11.00000    0.07796    0.05602 =
         0.05411   -0.00483    0.01879    0.01227
C9    1   -0.048123   -0.042948   -0.847282    11.00000    0.04484    0.05030 =
         0.05969    0.01226    0.01186    0.00578
C3    1    0.154715    0.085923   -0.737491    11.00000    0.04484    0.06754 =
         0.14791    0.02038   -0.01745   -0.01749
AFIX  43
H3    2    0.230443    0.130036   -0.702349    11.00000   -1.20000
AFIX   0
O24   4    0.007376   -0.146119   -0.431763    11.00000    0.09426    0.11128 =
         0.06583   -0.01103   -0.02697    0.03797
C28   1    0.010873   -0.244200   -0.622154    11.00000    0.06940    0.05062 =
         0.05579    0.01466    0.00561    0.01579
C18   1   -0.277784    0.205222   -0.738994    11.00000    0.06500    0.04677 =
         0.06296    0.00435    0.00954    0.00245
AFIX  43
H18   2   -0.223545    0.216076   -0.663461    11.00000   -1.20000
AFIX   0
C29   1   -0.071199   -0.322396   -0.687974    11.00000    0.07756    0.05034 =
         0.07360    0.00511    0.01842    0.00910
AFIX  43
H29   2   -0.174294   -0.333525   -0.671270    11.00000   -1.20000
AFIX   0
C12   1   -0.425549   -0.095104   -0.388713    11.00000    0.11628    0.06887 =
         0.07363    0.01995    0.04735    0.02034
AFIX  43
H12   2   -0.428595   -0.161048   -0.346973    11.00000   -1.20000
AFIX   0
C20   1   -0.360785    0.270032   -0.943897    11.00000    0.09284    0.08358 =
         0.07134    0.03512    0.02681    0.03135
AFIX  43
H20   2   -0.362933    0.323924   -1.005098    11.00000   -1.20000
AFIX   0
C27   1   -0.163485   -0.164382   -1.015801    11.00000    0.11909    0.09255 =
         0.05238   -0.01775    0.02292   -0.00576
AFIX 137
H27A  2   -0.073373   -0.207995   -1.024381    11.00000   -1.50000
H27B  2   -0.165568   -0.110070   -1.080542    11.00000   -1.50000
H27C  2   -0.253060   -0.208934   -1.024218    11.00000   -1.50000
AFIX   0
C2    1    0.163725    0.053488   -0.860559    11.00000    0.05181    0.08998 =
         0.12275    0.03527    0.02051   -0.00419
AFIX  43
H2    2    0.245071    0.079494   -0.907364    11.00000   -1.20000
AFIX   0
C33   1    0.165227   -0.228765   -0.647277    11.00000    0.06427    0.07226 =
         0.06730    0.01978    0.00319    0.01475
AFIX  43
H33   2    0.221497   -0.177522   -0.602050    11.00000   -1.20000
AFIX   0
C13   1   -0.542687   -0.028075   -0.394962    11.00000    0.10310    0.07141 =
         0.09101    0.01268    0.05581    0.01562
AFIX  43
H13   2   -0.636603   -0.039451   -0.356890    11.00000   -1.20000
AFIX   0
C30   1    0.001184   -0.384306   -0.779262    11.00000    0.10869    0.05596 =
         0.08336   -0.00359    0.02335    0.00814
AFIX  43
H30   2   -0.053038   -0.437600   -0.822834    11.00000   -1.20000
AFIX   0
C32   1    0.235229   -0.289782   -0.739765    11.00000    0.07410    0.08961 =
         0.08135    0.02582    0.02382    0.02207
AFIX  43
H32   2    0.338006   -0.278742   -0.757732    11.00000   -1.20000
AFIX   0
C31   1    0.152357   -0.366435   -0.804607    11.00000    0.10472    0.07362 =
         0.08287    0.00821    0.03962    0.02285
AFIX  43
H31   2    0.199619   -0.406966   -0.866844    11.00000   -1.20000
AFIX   0
HKLF 4

REM  cyc150509_zz in P21 #4
REM R1 =  0.0313 for    3874 Fo > 4sig(Fo)  and  0.0320 for all    3983 data
REM    299 parameters refined using      1 restraints

END

WGHT      0.0490      0.0699

REM Highest difference peak  0.110,  deepest hole -0.138,  1-sigma level  0.031
Q1    1   0.1445  0.0959 -0.6512  11.00000  0.05    0.11
Q2    1   0.2451 -0.0393 -0.5515  11.00000  0.05    0.10
Q3    1  -0.1356 -0.4368 -0.8658  11.00000  0.05    0.10
Q4    1  -0.6842 -0.0603 -0.4006  11.00000  0.05    0.09
Q5    1   0.2127  0.1334 -0.6479  11.00000  0.05    0.09
Q6    1  -0.5213  0.1005 -1.1371  11.00000  0.05    0.08
Q7    1  -0.3060 -0.1419 -1.0686  11.00000  0.05    0.08
Q8    1  -0.6666  0.0957 -1.1294  11.00000  0.05    0.08
Q9    1  -0.0661 -0.1990 -0.4261  11.00000  0.05    0.08
Q10   1  -0.0481 -0.1412 -1.0657  11.00000  0.05    0.08
Q11   1  -0.6117  0.0461 -1.1618  11.00000  0.05    0.08
Q12   1  -0.8114 -0.0760 -0.3169  11.00000  0.05    0.08
Q13   1  -0.7257 -0.0916 -0.4719  11.00000  0.05    0.08
Q14   1   0.2567  0.0794 -1.0576  11.00000  0.05    0.08
Q15   1  -0.2592  0.4372 -0.7619  11.00000  0.05    0.08
Q16   1   0.0055  0.0054 -0.5129  11.00000  0.05    0.08
Q17   1  -0.6434 -0.0235 -0.2865  11.00000  0.05    0.08
Q18   1  -0.6077  0.2563 -0.5355  11.00000  0.05    0.08
Q19   1  -0.7770 -0.1160 -0.3463  11.00000  0.05    0.07
Q20   1  -0.2342  0.3345 -0.6170  11.00000  0.05    0.07
;
_shelx_res_checksum               99579
_shelx_hkl_file
;
   0 -15   0 10.8347 14.9715  22
   0 -15   1 1114.44 55.1212  22
   0 -14   0 288.884 38.6251  22
   0 -14   1 120.926 29.4320  22
   0 -14  -1 80.6122 24.3781  22
   0 -14  -2 72.1665 22.9096  23
   0 -14  -2 93.4738 22.9291  22
   0 -14   2 122.981 29.3078  22
   0 -14  -3 481.782 43.7745  23
   0 -14   3 466.087 44.4081  22
   0 -14  -4 572.231 44.2409  23
   0 -14   4 568.974 44.6599  22
   0 -14   4 571.694 41.4317  15
   0 -14   5 77.4462 17.8141  15
   0 -14   5 64.7969 18.1732  22
   0 -13   0-2.70129 28.9353  22
   0 -13   1 198.450 39.5793  22
   0 -13  -1 182.994 39.5089  23
   0 -13  -2 2097.13 108.102  23
   0 -13   2 2145.84 110.755  22
   0 -13  -3 421.159 50.0882  23
   0 -13   3 415.011 51.8101  22
   0 -13  -4 957.925 69.3496  23
   0 -13   4 911.398 67.1474  22
   0 -13  -5 385.707 44.0520  23
   0 -13   5 424.160 44.2905  22
   0 -13   6 1071.37 61.0021  22
   0 -13  -6 1069.74 61.9070  23
   0 -13   6 1052.42 54.4695  15
   0 -12   0 5054.99 187.689  23
   0 -12  -1 63.6131 37.2988  23
   0 -12   2 2998.54 141.992  22
   0 -12  -2 3379.04 149.753  23
   0 -12  -3 11571.4 319.976  23
   0 -12   3 11906.5 320.883  22
   0 -12  -4 177.627 42.6191  23
   0 -12   4 258.477 46.3018  22
   0 -12  -5 621.267 62.2138  23
   0 -12   5 645.130 61.4219  22
   0 -12   6 200.390 36.0987  22
   0 -12  -6 180.497 36.3092  23
   0 -12  -7 16.3289 20.7513  23
   0 -12   7-5.67640 18.6390  22
   0 -12   7-8.11881 14.3966  15
   0 -12  -8 757.263 46.3262  23
   0 -11   0-6.59445 28.4269  23
   0 -11  -1 109.028 39.4897  23
   0 -11   1 140.877 36.7916  23
   0 -11   2 11276.3 318.863  22
   0 -11  -2 11532.4 324.881  23
   0 -11  -3 108.446 39.9248  23
   0 -11   3 119.683 36.8988  22
   0 -11   4 678.656 69.1467  22
   0 -11  -4 742.437 73.7515  23
   0 -11  -5 4890.76 189.014  23
   0 -11   5 4898.52 185.728  22
   0 -11  -6 167.110 39.1732  23
   0 -11   6 174.487 41.3831  22
   0 -11   7 34.5164 27.7851  22
   0 -11  -7 19.8762 27.1071  23
   0 -11   8 220.624 32.3488  22
   0 -11  -8 170.297 29.7681  23
   0 -10   0 8667.33 259.848  23
   0 -10  -1 15372.3 385.823  23
   0 -10   1 15283.7 379.647  23
   0 -10  -2 22669.9 521.357  23
   0 -10  -3 359.383 52.8873  23
   0 -10   3 462.837 57.8851  22
   0 -10   4 3291.12 153.435  22
   0 -10  -4 3372.27 157.609  23
   0 -10   5-11.3373 31.1203  22
   0 -10  -5 59.2716 36.8355  23
   0 -10  -6 9886.81 296.087  23
   0 -10   6 10189.1 296.021  22
   0 -10   7 507.988 57.6447  22
   0 -10  -7 512.273 61.3982  23
   0 -10   8 1093.51 74.9640  22
   0 -10  -8 1159.09 81.3307  23
   0 -10  -9 498.746 45.4060  23
   0 -10   9 560.250 44.9337  22
   0  -9   0-22.9394 86.9604   1
   0  -9   0-31.1570 69.2706  19
   0  -9   1 5962.45 474.210   1
   0  -9  -1 6963.56 529.124  19
   0  -9  -1 6816.35 495.601   1
   0  -9   1 7663.31 562.399  19
   0  -9   2 6933.48 538.156  19
   0  -9  -2 7687.69 555.825  19
   0  -9   2 6687.12 516.305   1
   0  -9  -2 7347.37 515.501   1
   0  -9   3 1290.91 88.7663  22
   0  -9  -3 1388.55 230.688  19
   0  -9  -3 1219.56 89.0526  23
   0  -9   4 1515.07 98.8635  22
   0  -9  -4 1569.48 102.569  23
   0  -9   5 2854.77 142.857  22
   0  -9  -5 2973.12 146.916  23
   0  -9   6 1951.95 117.711  22
   0  -9  -6 1952.42 117.808  23
   0  -9   7 5629.76 203.314  22
   0  -9  -7 5650.69 207.627  23
   0  -9  -8 1291.05 90.4255  23
   0  -9   8 1310.98 87.4677  22
   0  -9   9-0.42890 22.2343  22
   0  -9  -9 0.93414 24.3532  23
   0  -9  10 708.786 44.7991  22
   0  -9 -10 637.470 45.7499  23
   0  -8   0 4297.97 362.838   1
   0  -8   0 4413.68 386.981  19
   0  -8   1 2692.47 289.094   1
   0  -8  -1 3055.56 313.678  19
   0  -8   1 2798.77 320.375  19
   0  -8  -1 2678.34 277.596   1
   0  -8   2 6456.31 481.610  19
   0  -8  -2 6208.48 456.036  19
   0  -8   2 6276.17 461.179   1
   0  -8   3 1660.11 244.958  19
   0  -8  -3 1428.10 221.991  21
   0  -8  -3 1456.88 226.319  19
   0  -8   3 1739.71 255.403   1
   0  -8   4 13914.7 783.732   1
   0  -8  -4 13120.6 723.292  21
   0  -8  -5 3184.92 147.081  23
   0  -8   5 3283.09 148.429  22
   0  -8   6 20645.7 484.186  22
   0  -8  -6 20266.1 483.905  23
   0  -8  -7 9423.33 288.574  23
   0  -8   7 9173.08 281.287  22
   0  -8   8 561.116 61.2500  22
   0  -8  -8 556.607 63.2041  23
   0  -8  -9 53.7088 28.3958  23
   0  -8   9 109.212 33.4778  22
   0  -8  10 830.545 55.6958  22
   0  -8 -10 697.499 54.3165  23
   0  -7   0-42.1171 58.4050  19
   0  -7   0 192.364 79.7730   1
   0  -7  -1 4402.34 309.150  21
   0  -7   1 4316.05 339.694   1
   0  -7  -1 4632.69 349.630  19
   0  -7   1 4969.02 372.048  19
   0  -7  -2 15404.4 662.939  19
   0  -7   2 13374.1 643.227   1
   0  -7   2 16176.7 718.117  19
   0  -7  -2 14304.0 627.956  21
   0  -7  -3 19965.0 779.983  19
   0  -7   3 18616.7 821.239   1
   0  -7  -3 19687.2 806.783  21
   0  -7   3 19168.6 795.223  19
   0  -7   4 42.8506 71.2233   1
   0  -7  -4 227.341 101.876  21
   0  -7   5 4948.03 458.559   1
   0  -7  -5 4664.15 427.206  21
   0  -7   6 3192.86 145.437  22
   0  -7  -6 3147.79 144.988  23
   0  -7  -7 97.4702 36.3990  23
   0  -7   7 239.850 45.8702  22
   0  -7   8 4116.93 170.232  22
   0  -7  -8 4311.18 176.435  23
   0  -7   9 145.498 35.7919  22
   0  -7  -9 140.504 35.7639  23
   0  -7  10 1745.26 87.5794  22
   0  -7 -10 1662.60 90.2438  23
   0  -7  11 450.686 36.0324  11
   0  -7 -11 466.549 38.6614  23
   0  -6   0 12775.0 542.981  19
   0  -6   0 12865.5 481.844  21
   0  -6   1 8018.60 351.105  21
   0  -6  -1 8099.43 392.313  21
   0  -6  -1 8445.33 426.747  19
   0  -6   1 7867.49 425.992   1
   0  -6   1 8111.13 433.352  19
   0  -6  -2 17716.7 651.054  19
   0  -6   2 16765.9 680.165   1
   0  -6   2 18531.1 706.184  19
   0  -6  -2 18253.2 670.598  21
   0  -6  -2 17111.2 698.444  18
   0  -6  -3 9562.25 457.858  19
   0  -6   3 8570.27 466.774  19
   0  -6   3 9006.85 507.604   1
   0  -6  -3 9175.88 489.698  21
   0  -6  -3 9145.42 511.097  18
   0  -6  -4 17587.4 771.522  18
   0  -6  -4 18212.8 676.467  19
   0  -6   4 18305.3 807.011   1
   0  -6  -4 17494.2 756.247  21
   0  -6  -5 10358.0 609.232  18
   0  -6   5 10858.1 654.885   1
   0  -6  -5 10364.5 607.526  21
   0  -6   6 4927.48 465.845   1
   0  -6  -6 5852.12 479.860  18
   0  -6  -6 4801.16 443.296  21
   0  -6  -7 2185.80 117.396  23
   0  -6   7 2123.51 114.973  22
   0  -6  -7 1873.85 108.629  13
   0  -6   8 4966.70 187.107  22
   0  -6  -8 4872.38 188.521  23
   0  -6   9 2987.77 137.158  22
   0  -6  -9 3415.48 148.545  23
   0  -6 -10 803.106 65.5653  23
   0  -6  10 818.563 64.1804  22
   0  -6 -11 268.293 32.5177  23
   0  -5   0-12.3516 26.9161  21
   0  -5   0-0.80950 36.1320  19
   0  -5  -1 29489.3 826.952  19
   0  -5  -1 29438.3 875.888  18
   0  -5   1 32274.5 893.110   1
   0  -5   1 32917.8 885.632  19
   0  -5  -1 31449.8 834.823  21
   0  -5   1 31125.8 775.607  21
   0  -5  -2 14074.4 563.427  18
   0  -5   2 15896.0 578.175  19
   0  -5   2 15094.1 583.637   1
   0  -5  -2 15281.1 559.990  21
   0  -5  -2 14999.6 521.766  19
   0  -5   3 2521.58 243.007   1
   0  -5  -3 2736.11 206.343  19
   0  -5  -3 2836.40 242.159  21
   0  -5   3 2605.79 222.828  19
   0  -5  -4 29330.4 952.978  18
   0  -5  -4 29799.2 923.438  20
   0  -5  -4 28564.8 812.361  19
   0  -5   4 28192.3 991.705   1
   0  -5  -4 29761.0 957.943  21
   0  -5  -5 1241.88 183.549  20
   0  -5  -5 1334.18 196.821  21
   0  -5  -5 986.525 172.968  18
   0  -5   5 1202.81 202.276   1
   0  -5   6 8071.15 574.305   1
   0  -5  -6 8766.28 548.222  18
   0  -5  -6 8065.59 547.149  21
   0  -5   7 9515.29 269.694  22
   0  -5  -7 9397.85 267.391  13
   0  -5  -7 9910.08 272.380  23
   0  -5  -8 10755.9 299.771  13
   0  -5  -8 11251.8 304.973  23
   0  -5   8 10555.8 298.776  22
   0  -5  -9 210.883 41.0772  13
   0  -5   9 182.992 39.7061  22
   0  -5  -9 241.090 41.9503  23
   0  -5 -10 3686.30 150.159  13
   0  -5  10 3983.29 148.303  22
   0  -5 -10 3695.69 146.755  23
   0  -5 -11 605.395 49.1552  23
   0  -5  12 21.6745 15.6256  11
   0  -4   0 97917.3 2022.47  19
   0  -4   0 113693. 2016.11  21
   0  -4   1 2794.26 192.920  19
   0  -4  -1 2771.83 175.246  19
   0  -4  -1 2750.71 180.623  21
   0  -4   1 2787.43 163.851  21
   0  -4   1 2846.96 201.228   1
   0  -4  -1 3121.43 204.649  18
   0  -4   2 36271.0 947.416   1
   0  -4  -2 39542.2 953.861  18
   0  -4   2 37310.8 933.404  19
   0  -4  -2 34459.5 843.653  19
   0  -4  -2 38173.2 931.312  21
   0  -4  -3 275751. 4857.61  18
   0  -4  -3 272232. 4837.99  20
   0  -4   3 264331. 4791.99  19
   0  -4   3 256858. 4897.16   1
   0  -4  -3 272810. 4854.84  21
   0  -4  -3 266175. 4687.16  19
   0  -4   4 44200.8 1081.83   4
   0  -4  -4 46262.0 1034.55  19
   0  -4  -4 46578.6 1219.98  21
   0  -4  -4 46636.5 1199.26  18
   0  -4  -4 46349.4 1191.40  20
   0  -4   4 47096.5 1284.65   1
   0  -4  -5 19311.3 735.443  20
   0  -4  -5 19509.7 737.301  18
   0  -4   5 21289.2 843.274   1
   0  -4  -5 20807.1 786.052  21
   0  -4   5 20570.5 669.113   4
   0  -4   6 14048.8 735.673   1
   0  -4  -6 14001.1 695.305  21
   0  -4  -6 14506.0 663.216  18
   0  -4  -6 14436.1 670.232  20
   0  -4  -7 3530.89 338.037  18
   0  -4   7 3112.56 368.056   1
   0  -4  -7 3743.24 376.975  21
   0  -4  -8 56.2593 31.3175  13
   0  -4  -8 27.5701 27.1083  23
   0  -4   8 5.40012 28.1348  22
   0  -4  -9 9449.31 271.945  23
   0  -4  -9 9576.81 278.964  13
   0  -4   9 9677.19 273.073  22
   0  -4  10 2293.16 111.763  22
   0  -4 -10 2428.78 120.577  13
   0  -4 -10 2539.19 117.781  23
   0  -4  11 740.066 59.9434  11
   0  -4 -11 768.967 61.6145  13
   0  -4  12 245.324 29.6024  11
   0  -3   0 28.2821 27.9745  21
   0  -3   1 140061. 2326.21  21
   0  -3  -1 131529. 2369.40  21
   0  -3  -2 262612. 4618.96  19
   0  -3   2 281316. 4724.80  19
   0  -3  -2 265882. 4718.34  20
   0  -3  -2 276647. 4735.23  21
   0  -3   2 266875. 4768.12   1
   0  -3  -3 10701.6 335.628  19
   0  -3   3 11475.5 392.277  19
   0  -3  -3 11151.3 422.869  20
   0  -3   3 11920.2 473.328   1
   0  -3   3 11275.1 386.163   4
   0  -3  -4 77188.2 1633.57  18
   0  -3   4 71098.7 1546.48   4
   0  -3  -4 79333.0 1673.73  20
   0  -3  -4 73557.9 1430.56  19
   0  -3   4 76056.5 1739.69   1
   0  -3   5 10512.8 544.889   1
   0  -3  -5 10413.1 493.583  20
   0  -3   5 10039.1 434.973   4
   0  -3  -5 9927.01 458.073  18
   0  -3  -6 5942.59 376.119  18
   0  -3   6 6224.17 456.408   1
   0  -3   6 5437.63 347.805   4
   0  -3  -6 6096.48 411.246  20
   0  -3   7 12554.1 723.645   1
   0  -3  -7 11479.1 639.620  20
   0  -3  -7 11056.9 643.370  21
   0  -3  -8 616.388 56.6399  23
   0  -3  -8 630.896 61.2095  13
   0  -3   8 630.215 60.0149  22
   0  -3  -9 7534.30 238.510  13
   0  -3  -9 7453.22 227.184  23
   0  -3   9 7600.47 229.998  22
   0  -3  10 776.514 63.9663  22
   0  -3 -10 641.212 58.7716  23
   0  -3 -10 837.578 72.2109  13
   0  -3 -11 1246.16 80.3672  13
   0  -3  11 1199.82 77.5624  11
   0  -3  12 489.671 42.9798  11
   0  -2   0 16502.6 382.890  21
   0  -2   1 59101.0 1101.58  21
   0  -2  -1 58884.4 1138.79  20
   0  -2  -1 58012.8 1095.41  19
   0  -2   2 178538. 3161.15  19
   0  -2  -2 177552. 3188.29  20
   0  -2  -2 183541. 3093.67  19
   0  -2   3 13273.1 413.590   4
   0  -2  -3 13560.3 448.019  20
   0  -2   3 13350.5 480.767   1
   0  -2  -3 14486.4 452.463  18
   0  -2  -3 13594.5 339.399  19
   0  -2  -4 169721. 3131.33  18
   0  -2  -4 164232. 2886.69  19
   0  -2   4 170996. 3096.15   4
   0  -2   4 171679. 3259.54   1
   0  -2  -4 168879. 3161.78  20
   0  -2   5 130064. 2697.64   4
   0  -2   5 139402. 2658.65   5
   0  -2  -5 139774. 2806.00  20
   0  -2  -5 147820. 2735.58  18
   0  -2   5 137793. 2892.95   1
   0  -2   6 3243.75 318.379   1
   0  -2   6 3024.86 257.683   4
   0  -2  -6 3130.11 246.932  18
   0  -2  -6 3313.79 293.128  20
   0  -2  -7 12487.7 660.114  20
   0  -2   7 12545.0 607.500   4
   0  -2   7 12418.8 707.315   1
   0  -2  -8 18600.2 429.813  13
   0  -2  -8 18270.8 878.471  21
   0  -2   8 18522.4 422.948  22
   0  -2  -8 19977.5 428.137  23
   0  -2  -9 4892.27 170.186  23
   0  -2  -9 4822.25 179.727  13
   0  -2   9 4785.19 171.142  22
   0  -2 -10 1221.15 87.0733  13
   0  -2 -11 4217.59 156.625  13
   0  -2  11 4202.38 154.528  11
   0  -2  12 320.939 36.6068  11
   0  -2 -12 230.924 33.7482  13
   0  -1   1 482578. 8070.54  19
   0  -1  -1 490130. 8052.72  19
   0  -1  -2 159029. 2967.16  18
   0  -1   2 166172. 2918.23   4
   0  -1  -2 167741. 2869.16  19
   0  -1  -3 47037.1 908.971  19
   0  -1  -3 46728.3 1060.26  18
   0  -1   3 46651.5 1004.44   4
   0  -1   4 155372. 2811.53   5
   0  -1   4 155040. 2969.73   1
   0  -1   4 148627. 2852.37   4
   0  -1  -4 148652. 2882.39  18
   0  -1  -4 160602. 2933.50  20
   0  -1   5 49324.3 1142.29   5
   0  -1  -5 51224.2 1191.34  18
   0  -1   5 47136.7 1285.09   1
   0  -1   5 48474.4 1198.25   4
   0  -1  -5 49333.7 1260.91  20
   0  -1  -6 32134.2 1027.19  20
   0  -1   6 30523.9 965.345   4
   0  -1   6 31261.7 884.007   5
   0  -1  -6 33220.0 901.961  18
   0  -1   6 31067.0 1060.62   1
   0  -1   7 3354.63 347.667   1
   0  -1  -7 3164.26 321.582  20
   0  -1   7 3246.18 306.678   4
   0  -1   8 20986.4 907.430   4
   0  -1  -8 22682.3 488.578  13
   0  -1  -8 20401.5 944.780  20
   0  -1  -8 22590.4 491.612   8
   0  -1  -9 3878.46 154.965  13
   0  -1  -9 3619.57 153.228   8
   0  -1 -10 3314.40 143.894  13
   0  -1  10 2779.47 132.976  11
   0  -1  11 2603.54 119.071  11
   0  -1 -11 2377.04 114.474  13
   0  -1 -12 60.4868 25.1306  13
   0  -1  12 93.9756 28.2452  11
   0   0  -2 10059.4 253.960   3
   0   0  -2 10823.6 300.469  18
   0   0   2 10558.5 284.519   5
   0   0  -3 59216.4 1219.72  18
   0   0  -3 62174.2 1234.16  20
   0   0   3 54689.7 1147.36   5
   0   0  -3 59834.1 1107.22   3
   0   0   3 56989.7 1189.21   4
   0   0   3 55012.0 1227.28   1
   0   0   4 10936.2 418.217   4
   0   0  -4 11349.2 342.254   3
   0   0   4 11040.4 451.853   1
   0   0  -4 11580.0 441.569  18
   0   0  -4 11811.3 447.497  20
   0   0   4 11413.3 391.461   5
   0   0  -5 4368.45 275.437  18
   0   0   5 4252.80 308.413   1
   0   0   5 5073.14 307.019   4
   0   0  -5 4711.26 309.146  20
   0   0   5 4463.14 255.379   5
   0   0   6 12661.5 510.022   5
   0   0  -6 13452.4 619.114  20
   0   0   6 12722.2 575.233   4
   0   0  -7 1051.64 187.896  20
   0   0   7 938.191 167.628   4
   0   0  -8 78.5687 24.2949   8
   0   0  -8 111.993 49.2110  20
   0   0  -8 112.631 28.5353  13
   0   0   8 26.5279 54.3535   4
   0   0  -9 1991.43 108.733   8
   0   0  -9 1594.29 96.1319  13
   0   0 -10 423.209 55.6242   8
   0   0 -10 504.182 57.5535  13
   0   0  10 449.307 55.9760  11
   0   0 -11 367.985 48.3121  13
   0   0  11 367.503 49.4447  11
   0   0  12 405.489 42.3073  11
   0   0 -12 318.902 38.7997  13
   0   1   2 161615. 2970.36   5
   0   1  -2 179180. 2943.40   3
   0   1  -3 47461.1 952.543   3
   0   1  -3 47853.5 1043.92  17
   0   1   3 47431.6 1001.84   5
   0   1  -3 48076.9 944.465  18
   0   1   4 151404. 2815.51   5
   0   1  -4 151291. 2804.00  18
   0   1   4 157720. 2905.78   4
   0   1  -4 156538. 2730.15   3
   0   1  -4 151511. 2902.54  20
   0   1  -5 48106.0 1159.02  18
   0   1   5 44922.4 1118.23   5
   0   1  -5 49699.9 1248.54  20
   0   1   5 47978.3 1223.55   4
   0   1   6 31281.1 1004.79   4
   0   1   6 30948.8 901.637   5
   0   1  -6 31915.5 1027.92  20
   0   1  -7 3694.16 350.309  20
   0   1   7 3267.99 320.812   4
   0   1   8 23722.2 994.609   4
   0   1  -8 23107.3 493.936  13
   0   1  -8 22755.7 493.786   8
   0   1   8 20514.7 932.948   2
   0   1  -8 22549.6 998.581  20
   0   1  -9 3930.35 156.355   8
   0   1   9 3845.88 155.178  11
   0   1  -9 3585.85 149.196  13
   0   1 -10 2899.52 133.325  13
   0   1 -10 2670.75 129.486   8
   0   1  10 3078.23 136.502  11
   0   1  11 2477.37 115.742  11
   0   1 -11 2386.37 114.927  13
   0   1 -12 103.339 26.9867  13
   0   1  12 71.9218 25.4063  11
   0   2   0 19930.9 433.329   2
   0   2   1 61071.8 1122.38   2
   0   2  -1 58797.6 1123.91  17
   0   2   2 167832. 2973.15   2
   0   2  -2 170044. 2974.41  17
   0   2   3 12521.8 416.866   2
   0   2  -3 12406.8 378.873   3
   0   2   3 13455.7 451.962   4
   0   2   3 12942.1 417.609   5
   0   2  -3 13453.2 421.605  17
   0   2  -4 179429. 3046.68  18
   0   2  -4 164629. 3201.26  17
   0   2   4 170416. 3211.74   2
   0   2  -4 178120. 3267.62  20
   0   2   4 170179. 3257.72   4
   0   2   4 172071. 3185.36   5
   0   2  -4 167820. 3106.47   3
   0   2  -5 133743. 2756.76  17
   0   2   5 140490. 2745.08   2
   0   2   5 141582. 2789.70   4
   0   2  -5 138026. 2780.05  20
   0   2  -6 3761.62 318.940  20
   0   2   6 3181.17 256.716   5
   0   2   6 3333.57 302.438   4
   0   2   6 3667.39 299.926   2
   0   2   7 12152.3 654.366   4
   0   2   7 11645.2 561.810   5
   0   2  -7 12391.1 668.359  20
   0   2   7 12609.5 637.331   2
   0   2   8 18413.0 420.646  11
   0   2  -8 18645.6 422.171   8
   0   2   8 17392.4 828.900   2
   0   2   9 4721.84 176.364  11
   0   2  -9 4891.00 178.630   8
   0   2  -9 5036.53 180.824  13
   0   2 -10 1290.50 87.4614  13
   0   2  10 1375.96 89.7022  11
   0   2 -10 1317.35 87.6448   8
   0   2  11 4256.94 154.806  11
   0   2 -11 4212.30 154.817  13
   0   2 -11 4134.39 154.135   8
   0   2 -12 300.089 36.8973  13
   0   2  12 292.128 37.2324  11
   0   3   0 3.03041 19.1648   2
   0   3   1 134950. 2409.30   4
   0   3   1 137032. 2375.91   2
   0   3   2 274720. 4646.25   2
   0   3   2 262046. 4702.76   4
   0   3  -2 264896. 4654.62  17
   0   3   2 271570. 4691.41   5
   0   3  -3 12022.0 414.030  17
   0   3  -3 11313.2 393.497   3
   0   3   3 12107.3 430.910   5
   0   3   3 11977.7 448.541   4
   0   3   3 11290.4 402.212   2
   0   3  -4 78498.6 1595.75   3
   0   3   4 74736.1 1647.60   5
   0   3   4 78952.1 1726.79   4
   0   3   4 77574.6 1648.05   2
   0   3  -4 76057.0 1647.90  17
   0   3   5 9717.08 459.212   2
   0   3  -5 9828.84 493.528  20
   0   3   5 9583.42 448.948   5
   0   3   5 10154.0 500.680   4
   0   3  -5 11022.2 428.748   3
   0   3  -5 9146.29 459.278  17
   0   3   6 5634.77 379.438   2
   0   3  -6 6335.24 432.765  20
   0   3   6 6461.13 431.973   4
   0   3   6 6085.83 382.329   5
   0   3  -6 5977.40 416.294  17
   0   3   7 11698.0 585.469   5
   0   3   7 12727.8 683.373   4
   0   3  -7 12426.2 683.766  20
   0   3   7 11427.9 609.856   2
   0   3  -8 554.445 55.6696   8
   0   3   8 546.804 55.6849  11
   0   3   9 7585.31 234.707  11
   0   3  -9 7860.22 239.044  13
   0   3  -9 7463.89 233.285   8
   0   3  10 729.580 66.1905  11
   0   3 -10 731.304 66.4616   8
   0   3 -10 796.054 69.2450  13
   0   3  11 1181.79 76.2515  11
   0   3 -11 1142.46 75.5758   8
   0   3 -11 1077.51 74.7824  13
   0   3  12 514.194 43.8518  11
   0   3 -12 515.480 44.5503  13
   0   4   0 101242. 1907.23   2
   0   4   0 102730. 1969.74   5
   0   4   1 2816.42 164.869   2
   0   4   1 2947.48 190.051   5
   0   4  -1 2920.12 172.140  17
   0   4  -2 38400.8 878.137  17
   0   4   2 36224.4 849.053   2
   0   4   2 36689.4 902.257   5
   0   4   3 278874. 4922.84   5
   0   4   3 271613. 4935.36   4
   0   4  -3 280188. 4872.04  17
   0   4   3 264925. 4825.04   2
   0   4  -4 47192.3 1152.60  17
   0   4  -4 47362.6 1129.12   3
   0   4   4 46447.4 1218.16   4
   0   4   4 44736.4 1120.77   2
   0   4   4 43852.8 1157.58   5
   0   4   5 20045.7 776.310   4
   0   4   5 21368.2 746.848   5
   0   4  -5 19986.1 737.034  17
   0   4   5 20617.7 715.099   2
   0   4  -5 20352.3 688.650   3
   0   4  -5 21771.7 798.871  20
   0   4   6 14511.0 644.523   5
   0   4   6 14999.4 644.364   2
   0   4  -6 13771.2 667.097  17
   0   4  -6 14234.8 696.690  20
   0   4   6 13976.7 689.433   4
   0   4   7 3374.13 320.062   5
   0   4   7 3414.41 360.016   4
   0   4  -7 4007.20 385.504  20
   0   4   8-23.2191 28.3952  11
   0   4  -8-9.49550 27.4619   8
   0   4  -9 9492.38 271.341   8
   0   4   9 9513.35 272.700  11
   0   4  10 2406.93 117.661  11
   0   4 -10 2466.13 119.978  13
   0   4 -10 2414.54 117.950   8
   0   4 -11 767.094 60.6577   8
   0   4 -11 853.690 63.2404  13
   0   4  11 705.374 58.0616  11
   0   4  12 254.319 30.4108  11
   0   4 -12 202.718 23.7153  12
   0   4 -12 214.745 28.8547  13
   0   5   0-32.2935 42.7607  17
   0   5   0 28.6506 33.7438   5
   0   5   1 31622.7 765.340   2
   0   5   1 30830.5 836.120   5
   0   5  -2 15205.7 503.627  17
   0   5   2 14715.1 486.848   2
   0   5   2 13965.7 526.946   5
   0   5   2 14732.4 536.068   4
   0   5   3 2450.96 188.968   2
   0   5  -3 2618.61 206.971  17
   0   5   3 2237.89 207.457   5
   0   5   3 2786.76 234.450   4
   0   5  -4 30088.3 884.995   3
   0   5   4 28450.1 826.495   2
   0   5   4 28899.9 902.341   5
   0   5   4 27275.0 917.524   4
   0   5  -4 27876.6 853.350  17
   0   5  -5 1262.56 168.765   3
   0   5   5 1018.76 144.985   2
   0   5  -5 1368.42 181.043  17
   0   5   5 1207.60 191.104   4
   0   5   5 1222.15 173.155   5
   0   5  -6 8677.62 528.655  17
   0   5   6 9054.79 565.818   4
   0   5  -6 8895.42 566.389  20
   0   5   6 8336.01 503.171   5
   0   5   7 8021.05 527.875   5
   0   5  -7 8420.94 578.557  17
   0   5   7 10033.2 264.942  11
   0   5  -7 9553.71 260.922   8
   0   5   8 10679.7 290.841  11
   0   5  -8 10622.6 289.447   8
   0   5   9 207.529 40.2393  11
   0   5  -9 220.875 40.7890   8
   0   5 -10 3876.82 148.776   8
   0   5  10 3992.27 150.645  11
   0   5 -10 3914.64 150.998  13
   0   5 -11 629.549 53.0095  13
   0   5 -11 618.084 52.1927   8
   0   5  11 596.578 50.2523  11
   0   5  12 3.99780 14.4559  11
   0   5 -12 17.2282 15.3883  13
   0   6   0 10842.8 439.179  17
   0   6   1 7462.22 392.008   5
   0   6  -1 7094.60 346.893  17
   0   6   1 7916.12 349.003   2
   0   6   2 17439.9 572.804   2
   0   6  -2 16806.5 583.450  17
   0   6   2 17044.5 646.746   5
   0   6   3 8941.22 466.886   4
   0   6   3 8770.55 399.993   2
   0   6   3 9008.90 469.979   5
   0   6  -3 8784.13 422.240  17
   0   6  -4 18339.8 692.588  17
   0   6  -4 19885.0 737.777   3
   0   6   4 18887.2 757.480   5
   0   6   4 20012.8 790.235   4
   0   6   5 10347.2 570.569   5
   0   6  -5 10722.6 547.969  17
   0   6  -5 11181.5 556.348   3
   0   6   5 11103.5 618.289   4
   0   6  -6 4850.90 431.165  20
   0   6   6 4775.32 425.956   4
   0   6  -6 4408.29 381.222  17
   0   6   6 4783.66 399.369   5
   0   6  -7 1825.99 101.107   8
   0   6   7 1983.42 104.555  11
   0   6   8 4911.59 179.026  11
   0   6  -8 4872.89 177.883   8
   0   6   9 3327.72 139.889  11
   0   6  -9 3215.61 137.389   8
   0   6 -10 825.143 64.1375  13
   0   6 -10 743.124 61.8369   8
   0   6  10 844.172 64.5990  11
   0   6 -11 234.817 32.6139  13
   0   6 -11 255.997 33.1971   8
   0   6  11 295.945 34.5678  11
   0   7   0 16.4531 46.4414  17
   0   7   1 3910.15 304.413   5
   0   7  -1 3772.53 268.576  17
   0   7  -2 14047.2 558.905  17
   0   7   2 13833.3 626.759   5
   0   7   3 18100.9 763.560   5
   0   7  -3 18822.0 691.170  17
   0   7  -4 27.7836 55.1171  17
   0   7   4 151.759 86.0362   5
   0   7  -4 36.9584 50.1166   3
   0   7   5 4119.15 378.186   5
   0   7  -6 3328.30 132.365  16
   0   7   6 3289.87 135.634  11
   0   7   7 198.059 40.0494  11
   0   7  -7 141.693 30.2607  16
   0   7  -7 165.228 38.8180   8
   0   7  -8 4090.80 158.797   8
   0   7   8 4250.66 161.956  11
   0   7  -9 181.736 35.8903   8
   0   7   9 96.0948 29.2304  11
   0   7 -10 1688.26 87.2883  13
   0   7  10 1735.25 86.1009  11
   0   7 -10 1842.07 89.0199   8
   0   7 -11 417.974 37.9299  13
   0   7 -11 487.812 38.8439   8
   0   7  11 437.898 35.6071  11
   0   8   0 3852.96 293.959  17
   0   8  -1 2498.19 231.735  17
   0   8   1 2738.36 252.784  17
   0   8   2 6066.63 433.782   5
   0   8   3 1443.48 221.220   5
   0   8   4 13731.6 731.459   5
   0   8  -4 14415.3 711.980   3
   0   8  -5 3368.80 134.850   7
   0   8   5 3315.42 123.404   9
   0   8   5 3206.08 132.131  11
   0   8  -6 21075.0 453.588  16
   0   8   6 19698.5 453.158  11
   0   8  -7 9216.11 262.122   8
   0   8  -7 8978.91 245.021  16
   0   8   7 9565.79 265.417  11
   0   8   8 574.666 57.8177  11
   0   8  -8 481.927 53.1159   8
   0   8  -9 127.459 31.5609   8
   0   8   9 87.4669 27.4530  11
   0   8 -10 767.890 53.6699   8
   0   8 -10 746.794 54.2217  13
   0   8  10 807.466 52.4451  11
   0   9   3 1304.79 79.1212  11
   0   9  -3 1470.87 81.9158   7
   0   9   4 1665.60 88.8309   9
   0   9   4 1489.99 86.6977  11
   0   9  -4 1575.24 89.3674   7
   0   9  -5 2874.04 126.777   7
   0   9   5 2671.83 113.818   9
   0   9  -5 3099.05 134.418  16
   0   9   5 3011.29 128.275  11
   0   9  -6 1848.93 99.0889  16
   0   9   6 1890.51 101.643  11
   0   9   7 5378.53 182.059  11
   0   9  -7 5354.99 184.066   8
   0   9  -7 5264.87 170.139  16
   0   9   8 1256.92 77.6850  11
   0   9  -8 1265.20 80.0630   8
   0   9  -8 1144.79 66.1329  16
   0   9   9 24.3825 20.7461  11
   0   9  -9 14.7899 21.3086   8
   0   9  10 688.140 41.4421  11
   0   9 -10 786.675 48.5448  13
   0   9 -10 703.456 45.1403   8
   0  10   0 8560.15 232.560   7
   0  10   1 15455.5 355.110   7
   0  10  -1 15655.4 358.954   7
   0  10  -2 23042.2 486.684   7
   0  10   2 22781.2 487.016  11
   0  10   2 22780.2 480.640   7
   0  10  -3 488.612 51.7741   7
   0  10   3 522.727 52.2387  11
   0  10  -4 3389.05 136.503   7
   0  10   4 3286.96 133.962  11
   0  10  -5 73.4334 33.7725   7
   0  10   5 38.0990 29.9834  11
   0  10  -5 60.9836 34.1429  16
   0  10   6 9914.20 262.834  11
   0  10  -6 9680.90 259.044  16
   0  10   7 488.407 48.8581  11
   0  10  -7 460.321 46.6526  16
   0  10  -7 507.764 52.4474   8
   0  10  -8 1104.08 68.3018   8
   0  10  -8 990.292 57.4260  16
   0  10   8 1146.37 66.2743  11
   0  10  -9 473.868 39.9850   8
   0  10   9 504.658 37.1691  11
   0  11   0 13.9103 21.5279   7
   0  11  -1 184.150 35.4554   7
   0  11   1 183.802 35.5936   7
   0  11   2 11388.0 285.319   7
   0  11  -2 11605.9 293.732   7
   0  11   3 55.3922 23.2001   7
   0  11  -3 111.614 28.6155   7
   0  11   4 698.850 54.3773   7
   0  11  -4 874.416 72.0609  16
   0  11   4 819.924 63.2794  11
   0  11  -4 765.862 63.1945   7
   0  11   5 4848.71 160.571  11
   0  11  -5 4953.86 167.812  16
   0  11  -6 87.7994 29.0280   8
   0  11   6 126.659 27.0443  11
   0  11  -6 130.575 28.3170  16
   0  11  -7 25.2261 18.2828  16
   0  11   7-9.38130 18.4434  11
   0  11  -7 3.10124 19.5674   8
   0  11  -8 184.383 24.4507  16
   0  11  -8 195.522 29.1537   8
   0  12   0 4996.51 165.171   7
   0  12  -1 93.9938 30.2292   7
   0  12   1 60.1738 25.2949   7
   0  12  -2 3474.95 133.973   7
   0  12  -2 3525.54 141.255  16
   0  12   2 3328.69 125.910   7
   0  12   3 11139.1 273.423   7
   0  12  -3 11519.2 289.472   7
   0  12   4 161.835 27.4174   7
   0  12  -4 197.562 34.1139   7
   0  12  -4 221.672 40.1385  16
   0  12  -5 580.763 51.1705  16
   0  12  -6 199.662 30.7382  16
   0  12  -6 328.296 39.1064   8
   0  12  -7-13.0049 16.8760  16
   0  12  -7 6.75436 16.8297   8
   0  13   0 17.4063 21.0148   7
   0  13   1 208.808 32.1625   7
   0  13  -1 197.875 33.3041  16
   0  13  -1 211.608 33.0495   7
   0  13  -2 2039.78 92.9932   7
   0  13   2 1967.56 84.6147   7
   0  13  -2 2063.42 94.2256  16
   0  13   3 415.060 36.3984   7
   0  13  -3 416.375 44.1297  16
   0  13  -3 393.479 41.2862   7
   0  13  -4 898.869 58.0565  16
   0  13  -5 348.672 35.4349  16
   0  13  -5 431.768 40.6627   8
   0  13  -6 1012.88 52.0324  16
   0  13  -6 1110.95 55.1850   8
   0  14   0 290.911 30.4000   7
   0  14  -1 87.1544 19.3232  16
   0  14   1 111.501 21.2180   7
   0  14  -1 90.1005 21.1737   7
   0  14  -2 120.789 22.1646   7
   0  14  -2 48.1899 17.6396  16
   0  14  -3 434.360 35.8903  16
   0  14  -4 582.091 39.4163  16
   0  14  -5 68.7091 15.9656  16
   1 -15  -1 291.004 28.4922  22
   1 -15   0 2024.21 77.4447  22
   1 -15   1 73.0518 19.3041  22
  -1 -14   5 1514.28 59.7492  15
   1 -14  -4-4.79291 15.4819  23
  -1 -14   4 16.9740 16.5201  15
  -1 -14   4-0.39383 17.0484  22
  -1 -14   3 847.904 52.7113  15
   1 -14  -3 915.415 53.9973  23
  -1 -14   3 890.098 58.0800  22
  -1 -14   2 322.910 34.7077  15
  -1 -14   2 371.295 41.4133  22
  -1 -14   1 818.168 51.4901  15
   1 -14  -1 868.953 61.6861  22
  -1 -14   1 847.487 58.3861  22
   1 -14   0 1222.24 73.4209  22
  -1 -14   0 1172.73 66.0510  22
   1 -14   1 1004.15 67.3333  22
   1 -14   2 693.940 55.2483  22
  -1 -14  -2 671.403 53.0755  23
  -1 -14  -3 29.2476 21.1112  23
   1 -14   3-1.69061 20.3142  22
   1 -14   4 19.8014 17.2735  22
  -1 -14  -4 34.6157 20.0406  23
  -1 -13   6 505.923 37.7226  15
   1 -13  -6 453.879 39.0232  23
  -1 -13   6 525.792 42.3247  22
  -1 -13   5 540.830 48.6039  22
  -1 -13   5 595.147 47.4472  15
   1 -13  -5 475.498 44.9529  23
  -1 -13   4 1835.76 94.1286  22
  -1 -13   4 1774.08 86.5701  15
   1 -13  -4 1720.09 89.2468  23
  -1 -13   3 708.630 61.7193  22
   1 -13  -3 675.825 58.2322  23
   1 -13  -2 3452.47 137.215  23
  -1 -13   2 3653.05 145.168  22
  -1 -13   1 5430.74 184.269  22
  -1 -13   0 3402.68 138.097  22
  -1 -13   0 3484.08 125.071  15
  -1 -13  -1 2147.11 103.746  22
   1 -13   1 2391.13 117.706  22
  -1 -13  -1 2301.74 116.529  23
   1 -13   2 681.785 62.4253  22
  -1 -13  -2 679.625 65.5834  23
  -1 -13  -3 4433.87 164.413  23
   1 -13   3 4472.72 161.627  22
   1 -13   4 91.8076 28.5577  22
  -1 -13  -4 64.8776 27.1345  23
   1 -13   5 653.714 52.5949  22
  -1 -13  -5 644.553 54.4417  23
   1 -13   6 299.540 32.7708  22
  -1 -13  -6 315.306 34.8318  23
  -1 -12   7 157.413 22.7715  15
  -1 -12   7 177.178 30.0695  22
   1 -12  -7 184.505 31.0232  23
  -1 -12   6 144.903 33.1747  22
  -1 -12   6 113.783 25.7169  15
   1 -12  -6 151.793 34.9720  23
  -1 -12   5 1496.06 90.8818  22
   1 -12  -5 1370.26 85.6586  23
   1 -12  -4 295.743 44.9033  23
  -1 -12   4 288.276 46.1171  22
   1 -12  -3 287.733 47.2084  23
  -1 -12   3 351.612 51.5202  22
   1 -12  -2 1089.62 82.1837  23
  -1 -12   2 1086.16 85.6738  22
  -1 -12   1 9912.52 288.076  22
   1 -12  -1 10293.9 285.572  23
  -1 -12   0 377.028 51.9916  22
  -1 -12   0 331.541 52.7586  23
  -1 -12  -1 7407.09 243.802  23
  -1 -12  -2 732.918 72.2354  23
   1 -12   2 850.914 75.3237  22
  -1 -12  -3 1997.62 115.763  23
   1 -12   3 1857.70 108.686  22
  -1 -12  -4 4520.99 176.020  23
   1 -12   4 4520.71 171.755  22
   1 -12   5 1287.31 83.3033  22
  -1 -12  -5 1371.97 89.1153  23
   1 -12   6 760.643 59.3717  22
  -1 -12  -6 743.850 61.5593  23
   1 -12   7 191.272 30.1505  22
  -1 -12  -7 151.476 29.6271  23
  -1 -11   8 333.381 38.6819  22
   1 -11  -8 290.095 37.2780  23
   1 -11  -7 1063.46 73.3885  23
  -1 -11   7 1168.07 75.6684  22
  -1 -11   7 1109.31 63.7666  15
   1 -11  -6 736.897 66.7720  23
  -1 -11   6 687.299 64.5116  22
   1 -11  -5 4217.05 171.743  23
  -1 -11   5 4629.48 176.971  22
  -1 -11   4 4928.20 187.656  22
   1 -11  -4 4646.49 182.181  23
   1 -11  -3 957.097 80.2047  23
  -1 -11   3 985.768 82.0782  22
  -1 -11   2 2865.20 140.855  22
   1 -11  -2 2994.88 141.150  23
  -1 -11   1 8055.24 255.228  23
   1 -11  -1 7925.55 247.928  23
  -1 -11   1 8202.48 254.957  22
  -1 -11   0 6255.20 221.734  23
  -1 -11  -1 7141.22 242.376  23
  -1 -11  -2 1659.85 109.573  23
  -1 -11  -3 2819.08 143.969  23
   1 -11   3 2753.63 139.182  22
   1 -11   4 936.819 79.6816  22
  -1 -11  -4 963.828 84.3328  23
   1 -11   5 2314.33 121.286  22
  -1 -11  -5 2251.24 123.730  23
  -1 -11  -6 534.587 59.8117  23
   1 -11   6 530.882 56.8181  22
  -1 -11  -7 385.069 48.8884  23
   1 -11   7 381.010 44.7654  22
   1 -11   8 1767.79 78.5513  22
  -1 -11  -8 1669.75 82.3731  23
  -1 -10   9 195.473 30.9210  22
   1 -10  -9 174.630 29.6877  23
  -1 -10   8 500.445 52.2991  22
   1 -10  -8 557.934 56.8595  23
   1 -10  -7 20.3416 29.1161  23
  -1 -10   7 56.6822 27.2335  15
  -1 -10   7 41.9149 33.5783  22
  -1 -10   6 392.409 55.6626  22
   1 -10  -6 315.786 51.8283  23
   1 -10  -5 6331.97 220.934  23
  -1 -10   5 6328.35 223.582  22
  -1 -10   4 8928.40 276.515  22
   1 -10  -4 9348.61 280.801  23
   1 -10  -3 124.299 38.0913  23
  -1 -10   3 110.970 35.7061  22
  -1 -10   2 14735.7 377.795  23
  -1 -10   2 15151.3 379.955  22
   1 -10  -2 14680.8 375.769  23
  -1 -10   1 4337.20 174.600  23
   1 -10  -1 4417.03 170.304  23
  -1 -10   0 4246.01 173.450  23
  -1 -10  -1 2260.46 124.429  23
  -1 -10  -2 8642.70 272.444  23
   1 -10   3 6910.41 230.593  22
  -1 -10  -3 6914.29 239.696  23
   1 -10   4 14106.7 370.510  22
  -1 -10  -4 14024.8 379.306  23
  -1 -10  -5 4384.63 182.734  23
   1 -10   5 4470.15 180.442  22
   1 -10   6 397.220 53.7577  22
  -1 -10  -6 389.628 56.6903  23
  -1 -10  -7 542.864 61.8826  23
   1 -10   7 425.899 52.2640  22
  -1 -10  -8 359.117 47.0138  23
   1 -10   8 347.692 42.3095  22
   1 -10   9 334.479 32.6843  22
  -1 -10  -9 425.552 40.8806  23
   1  -9 -10 1160.72 62.7242  23
  -1  -9  10 1260.96 63.1425  22
   1  -9  -9 513.161 52.5874  23
  -1  -9   9 604.425 54.9424  22
  -1  -9   8 5858.48 198.558  22
   1  -9  -8 5549.30 197.379  23
   1  -9  -7 1658.22 105.424  23
  -1  -9   7 1656.34 106.299  22
  -1  -9   6 2187.49 123.890  22
   1  -9  -6 2342.13 126.918  23
   1  -9  -5 319.833 52.9486  23
  -1  -9   5 332.703 52.0138  22
  -1  -9   4 4893.24 187.187  22
   1  -9  -4 4801.90 184.459  23
  -1  -9   3 7674.96 240.363  22
   1  -9  -3 8058.68 246.092  23
   1  -9  -2 12506.3 707.471  19
  -1  -9   2 12538.4 699.238   1
  -1  -9   1 7658.56 566.131  19
   1  -9  -1 7644.79 543.497   1
   1  -9  -1 8199.89 565.656  19
  -1  -9   0 142.141 97.0672  19
   1  -9   0 176.766 76.7465   1
   1  -9   0 142.942 79.7706  19
   1  -9   1 7047.50 528.313   1
   1  -9   1 7129.18 538.752  19
  -1  -9  -1 6804.71 533.511  19
  -1  -9  -2 8450.51 258.766  23
   1  -9   2 7725.50 565.049   1
  -1  -9  -2 8122.47 577.458  19
   1  -9   2 8812.35 606.611  19
  -1  -9  -3 4305.92 175.751  23
  -1  -9  -4 7075.32 238.275  23
   1  -9   4 6909.59 230.239  22
   1  -9   5 591.526 65.6941  22
  -1  -9  -5 643.447 69.5552  23
  -1  -9  -6 13405.7 367.690  23
   1  -9   6 13990.0 364.194  22
   1  -9   7 1546.42 98.8055  22
  -1  -9  -7 1558.72 102.754  23
   1  -9   8 345.417 47.0414  22
  -1  -9  -8 463.674 56.8795  23
  -1  -9  -9 1709.51 87.8647  23
   1  -9   9 1725.79 82.9751  22
  -1  -9 -10 602.499 41.0616  23
  -1  -8  10 149.739 30.0203  22
   1  -8 -10 136.625 31.3735  23
   1  -8  -9 1840.36 102.863  23
  -1  -8   9 1831.55 100.473  22
  -1  -8   8 648.735 67.1988  22
   1  -8  -8 583.808 64.1670  23
   1  -8  -7 2197.39 124.758  23
  -1  -8   7 2049.62 120.747  22
  -1  -8   6 1573.56 105.075  22
   1  -8  -6 1486.80 100.029  23
  -1  -8   5 704.737 69.0681  22
   1  -8  -5 697.998 68.0056  23
   1  -8  -4 19493.4 446.216  23
  -1  -8   4 17298.3 881.408   1
  -1  -8   4 19197.2 445.234  22
   1  -8  -4 17184.4 890.955  18
   1  -8  -4 18215.5 816.287  19
   1  -8  -3 11665.0 618.793  19
  -1  -8   3 10833.8 643.049   1
  -1  -8   2 12367.3 677.931  19
  -1  -8   2 13292.1 670.486   1
   1  -8  -2 11907.6 623.476  19
  -1  -8   1 382.518 113.203   1
  -1  -8   1 344.589 136.822  19
   1  -8  -1 305.740 108.591  19
   1  -8   0 19887.7 860.727   1
  -1  -8   0 22428.0 944.123  19
   1  -8   0 22814.5 897.325  19
  -1  -8   0 20248.9 809.155   1
  -1  -8   0 21561.0 825.154  21
   1  -8   1 1853.73 252.000   1
  -1  -8  -1 1780.30 231.503  21
  -1  -8  -1 2097.40 273.916  19
   1  -8   1 1780.58 251.791  19
  -1  -8  -2 2679.56 299.030  21
  -1  -8  -2 2502.42 298.865  19
   1  -8   2 2638.13 298.704  19
   1  -8   2 2343.36 295.081   1
  -1  -8  -3 5959.96 455.873  19
   1  -8   3 5697.71 450.966  19
  -1  -8  -3 5219.53 445.223  21
   1  -8   3 5636.40 474.477   1
   1  -8   4 3729.76 151.962  22
  -1  -8  -4 3596.06 154.511  23
   1  -8   4 3360.41 388.302   1
  -1  -8  -4 2933.45 348.280  21
  -1  -8  -5 8908.75 272.678  23
   1  -8   5 9047.68 268.924  22
  -1  -8  -6 5176.06 200.002  23
   1  -8   6 5237.63 195.096  22
  -1  -8  -7 5847.06 215.688  23
   1  -8   7 5927.82 208.562  22
  -1  -8  -8 591.779 63.8380  23
   1  -8   8 523.736 57.3015  22
   1  -8   9 669.229 57.0313  22
  -1  -8  -9 664.293 60.6075  23
  -1  -8 -10 759.180 52.3476  23
   1  -7 -11 576.086 44.3599  23
  -1  -7  11 683.209 44.7996  22
   1  -7 -10 2366.55 109.366  23
  -1  -7  10 2523.00 111.881  22
   1  -7  -9 68.7456 31.9589  23
  -1  -7   9 3.07315 27.8991  22
   1  -7  -8 773.757 73.2261  23
  -1  -7   8 747.010 72.7134  22
   1  -7  -7 11346.9 318.238  23
  -1  -7   7 11485.6 323.343  22
   1  -7  -6 330.353 48.1156  23
  -1  -7   6 449.928 56.4079  22
  -1  -7   5 15581.0 830.559   1
   1  -7  -5 16647.9 837.069  18
   1  -7  -5 15536.6 776.294  21
   1  -7  -4 7320.51 440.464  19
  -1  -7   4 6725.92 498.245   1
   1  -7  -4 6678.79 457.137  21
   1  -7  -4 6939.54 497.043  18
  -1  -7   3 3966.99 354.563   1
   1  -7  -3 4321.96 371.701  18
   1  -7  -3 4137.41 318.192  19
   1  -7  -3 4020.97 325.784  21
   1  -7  -2 12818.9 629.930  18
  -1  -7   2 11901.1 617.877  19
   1  -7  -2 12768.7 573.199  19
  -1  -7   2 11946.7 590.959   1
  -1  -7   1 2340.94 230.797  21
   1  -7  -1 2166.83 228.968  19
  -1  -7   1 2175.26 226.945   1
  -1  -7   1 2111.28 249.927  19
  -1  -7   0 5569.54 410.926  19
  -1  -7   0 4524.02 325.966   1
   1  -7   0 4961.01 367.552   1
  -1  -7   0 5315.53 358.358  21
   1  -7   0 5479.62 364.525  19
  -1  -7  -1 38001.0 1088.41   1
   1  -7   1 40005.0 1173.62  19
  -1  -7  -1 38078.1 1153.57  21
  -1  -7  -1 41633.6 1258.71  19
  -1  -7  -2 16645.9 743.799  19
   1  -7   2 15997.4 735.958   1
  -1  -7  -2 15507.8 705.372  21
   1  -7   2 17122.0 722.890  19
   1  -7   3 625.503 153.787   1
   1  -7   3 775.127 153.359  19
  -1  -7  -3 625.602 152.703  21
  -1  -7  -3 1158.79 185.090  19
   1  -7   4 14477.3 773.697   1
  -1  -7  -4 14125.6 755.854  21
   1  -7   5 5498.78 493.158   1
  -1  -7  -5 5159.08 471.296  21
   1  -7   6 19031.9 446.476  22
  -1  -7  -6 19085.7 455.129  23
  -1  -7  -7 1895.87 114.449  23
   1  -7   7 1787.63 105.682  22
   1  -7   8 2010.92 109.865  22
  -1  -7  -8 1939.62 114.413  23
  -1  -7  -9 513.822 56.0970  23
   1  -7   9 598.906 56.8163  22
  -1  -7 -10 245.811 37.4010  23
  -1  -6  11 658.185 49.5500  22
   1  -6 -11 680.940 53.0385  23
  -1  -6  11 570.901 42.2538  11
  -1  -6  10 1247.96 81.0293  22
   1  -6 -10 1201.42 80.8815  23
   1  -6  -9 590.262 63.4503  23
  -1  -6   9 549.428 61.8669  22
   1  -6  -8 5708.42 205.691  23
  -1  -6   8 5891.78 210.742  22
  -1  -6   7 1050.39 83.1253  22
   1  -6  -7 903.203 75.1164  23
   1  -6  -6 3492.74 359.759  21
   1  -6  -6 3644.45 147.068  23
   1  -6  -6 3146.87 344.725  18
  -1  -6   6 3507.69 148.581  22
  -1  -6   6 3106.24 360.314   1
   1  -6  -5 8904.22 544.118  21
  -1  -6   5 9097.94 587.692   1
   1  -6  -5 9447.99 569.137  18
   1  -6  -4 12293.4 523.615  19
   1  -6  -4 13020.3 606.752  21
   1  -6  -4 13611.7 644.931  18
  -1  -6   4 12768.0 654.205   1
   1  -6  -3 8817.84 427.963  19
  -1  -6   3 9229.97 508.451   1
   1  -6  -3 10275.9 519.901  18
   1  -6  -3 9717.45 476.918  21
  -1  -6   2 67409.0 1690.07  19
   1  -6  -2 71093.2 1677.15  18
   1  -6  -2 71052.1 1580.10  21
  -1  -6   2 70232.8 1661.30   1
  -1  -6   1 14667.7 582.142   1
  -1  -6   1 15701.1 597.102  21
  -1  -6   1 17014.8 683.977  19
   1  -6  -1 16253.5 538.297  21
   1  -6  -1 16899.7 591.768  19
   1  -6  -1 15321.7 609.245  18
  -1  -6   0 7074.50 390.546  21
  -1  -6   0 7936.36 449.460  19
   1  -6   0 7099.69 370.206  19
  -1  -6   0 7170.26 373.077   1
  -1  -6  -1 10953.2 528.604  19
  -1  -6  -1 9366.88 469.565  21
   1  -6   1 11328.9 485.707  19
   1  -6   1 9544.16 492.077   1
  -1  -6  -1 9229.10 424.179   1
  -1  -6  -2 5686.50 379.821  21
   1  -6   2 6449.89 378.753  19
  -1  -6  -2 6478.79 395.024  19
   1  -6   2 6426.76 415.088   1
   1  -6   3 20360.3 825.699   1
  -1  -6  -3 22138.8 853.591  21
   1  -6   3 21565.3 771.550  19
  -1  -6  -3 22113.9 786.122  19
   1  -6   4 9167.50 565.382   1
   1  -6   4 9552.72 487.307  19
  -1  -6  -4 9400.11 564.646  21
  -1  -6  -5 9463.39 605.845  21
   1  -6   5 9787.29 632.062   1
   1  -6   6 7057.20 563.284   1
  -1  -6  -6 6694.60 213.560  13
  -1  -6  -6 6571.51 535.023  21
  -1  -6  -7 9059.65 271.757  13
   1  -6   7 9548.97 271.195  22
  -1  -6  -7 10010.5 283.637  23
  -1  -6  -8 7188.34 234.473  23
   1  -6   8 7246.63 226.301  22
  -1  -6  -8 6685.89 226.642  13
  -1  -6  -9 1753.55 103.664  23
   1  -5 -11 710.352 55.5797  23
  -1  -5  11 623.786 50.6884  22
  -1  -5  11 673.832 50.4521  11
  -1  -5  10 2262.40 115.246  22
   1  -5 -10 2385.66 115.473  23
  -1  -5   9 524.869 59.9085  22
   1  -5  -9 405.878 53.4542  23
   1  -5  -9 513.556 57.1884  13
   1  -5  -8 2555.75 126.564  23
   1  -5  -8 2557.18 125.460  13
  -1  -5   8 2519.80 128.619  22
   1  -5  -7 1587.40 94.9184  23
  -1  -5   7 1611.45 98.3013  22
   1  -5  -7 1728.91 97.0737  13
   1  -5  -6 81.5051 80.8634  18
  -1  -5   6 70.2914 72.1030   1
   1  -5  -6 71.8291 88.5146  21
   1  -5  -5 2688.01 277.840  18
   1  -5  -5 3132.43 295.133  21
  -1  -5   5 2832.54 311.258   1
  -1  -5   4 36188.6 1129.91   1
   1  -5  -4 36767.7 1059.98  21
   1  -5  -4 33872.6 914.344  19
   1  -5  -4 34450.7 1054.20  18
   1  -5  -3 41120.9 1079.35  21
   1  -5  -3 40095.5 1002.89  19
  -1  -5   3 38533.3 1133.66   1
   1  -5  -2 36320.4 992.399  18
   1  -5  -2 38488.6 957.581  21
  -1  -5   2 38130.5 1050.53  19
   1  -5  -2 36153.6 917.625  19
  -1  -5   2 36745.7 1004.37   1
  -1  -5   1 16851.8 583.328  21
   1  -5  -1 17079.4 519.256  21
  -1  -5   1 17484.6 647.233  19
   1  -5  -1 16855.1 538.145  19
  -1  -5   1 16634.5 570.577   1
   1  -5  -1 17889.9 591.571  18
  -1  -5   0 40474.2 1000.17   1
   1  -5   0 42492.8 910.978  21
  -1  -5   0 40322.4 1056.46  21
   1  -5   0 41809.1 1002.44  19
   1  -5   0 41593.4 1019.95  18
  -1  -5   0 43855.0 1139.19  19
   1  -5   1 12410.2 460.054  19
  -1  -5  -1 13248.8 532.270  19
   1  -5   1 12383.1 519.691   1
  -1  -5  -1 12983.4 514.350  21
  -1  -5  -2 52985.0 1359.67  21
  -1  -5  -2 54821.6 1327.68  19
   1  -5   2 54711.1 1385.78   1
   1  -5   2 55759.2 1283.75  19
  -1  -5  -3 37575.4 1115.01  21
   1  -5   3 39598.3 1023.60  19
   1  -5   3 36731.9 1107.99   1
  -1  -5  -3 37196.1 1014.33  19
  -1  -5  -4 49978.4 1401.28  20
   1  -5   4 53575.6 1485.13   1
   1  -5   4 52238.5 1330.78   4
  -1  -5  -4 52600.2 1453.80  21
   1  -5   4 51674.1 1277.13  19
   1  -5   5 1946.83 213.636   4
  -1  -5  -5 1597.14 222.958  20
  -1  -5  -5 1660.07 231.735  21
   1  -5   5 1745.52 243.753   1
  -1  -5  -6 4785.58 414.595  20
   1  -5   6 5080.88 456.443   1
  -1  -5  -6 5452.07 463.419  21
   1  -5   7 13215.8 331.828  22
  -1  -5  -7 13544.3 339.489  23
  -1  -5  -7 13158.7 337.593  13
   1  -5   8 3259.62 140.835  22
  -1  -5  -8 3625.17 151.829  23
  -1  -5  -8 3454.58 150.507  13
  -1  -5  -9 2523.27 127.784  13
  -1  -5  -9 2707.29 127.007  23
  -1  -5 -10 17.0067 26.7561  13
   1  -5  12 626.904 41.3463  11
  -1  -4  12 275.719 28.9899  11
  -1  -4  11 125.729 29.0476  11
  -1  -4  11 133.822 28.2007  22
   1  -4 -11 126.783 27.3677  23
   1  -4 -10 3074.36 133.552  23
   1  -4 -10 3054.60 132.390  13
  -1  -4  10 3185.64 137.449  22
  -1  -4   9 3722.16 157.808  22
   1  -4  -9 3810.60 156.149  13
   1  -4  -9 3718.11 154.043  23
   1  -4  -8 11557.1 306.267  23
   1  -4  -8 11469.3 305.783  13
  -1  -4   8 11306.3 311.882  22
   1  -4  -7 6901.17 480.205  18
  -1  -4   7 7168.72 565.196   1
   1  -4  -6 7503.99 466.141  18
  -1  -4   6 7096.58 516.752   1
  -1  -4   5 2073.29 250.394   1
   1  -4  -5 2548.18 249.212  18
   1  -4  -4 111374. 2206.23  20
   1  -4  -4 108887. 2121.74  19
   1  -4  -4 115487. 2324.20  18
   1  -4  -3 28438.6 747.509  19
   1  -4  -3 30116.6 841.196  18
   1  -4  -3 29649.0 746.650  20
  -1  -4   3 27416.9 856.906   1
  -1  -4   2 13579.2 513.534  19
   1  -4  -2 14897.5 504.221  18
  -1  -4   2 13499.9 502.955   1
   1  -4  -2 15121.1 467.907  19
   1  -4  -1 22197.1 561.240  21
  -1  -4   1 21548.9 479.122   6
  -1  -4   1 22436.0 684.802  19
   1  -4  -1 21113.1 581.082  19
  -1  -4   1 21902.6 636.345  21
  -1  -4   1 20120.1 595.589   1
   1  -4  -1 23041.0 621.806  18
   1  -4   0 3542.71 157.915  21
   1  -4   0 3166.55 186.338  18
  -1  -4   0 3752.38 245.651  19
   1  -4   0 3217.11 184.506  19
  -1  -4   0 3217.47 217.163  21
  -1  -4   0 3200.36 186.560   1
  -1  -4  -1 53101.9 1207.33  21
  -1  -4  -1 55744.4 1220.83  19
   1  -4   1 52642.5 1213.14   1
   1  -4   2 76841.4 1583.45  19
  -1  -4  -2 76523.7 1701.89  21
   1  -4   2 77345.6 1711.18   1
   1  -4   3 51749.4 1175.90  19
  -1  -4  -3 50475.8 1174.84  19
  -1  -4  -3 51941.1 1298.80  20
   1  -4   3 50710.8 1297.42   1
  -1  -4  -3 53660.1 1318.81  21
  -1  -4  -3 52912.8 1304.52  18
   1  -4   4 67407.2 1419.76  19
  -1  -4  -4 63719.7 1596.06  20
   1  -4   4 65625.3 1521.22   4
  -1  -4  -4 63824.6 1573.41  18
  -1  -4  -4 66062.7 1617.47  21
   1  -4   4 62276.6 1613.06   1
   1  -4   5 45049.2 1365.68   1
  -1  -4  -5 46449.0 1346.63  21
   1  -4   5 48109.0 1252.58   4
  -1  -4  -5 45959.6 1299.94  18
  -1  -4  -5 45179.1 1331.23  20
   1  -4   6 8752.01 570.231   1
  -1  -4  -6 9031.90 528.385  18
  -1  -4  -6 9494.82 578.693  21
  -1  -4  -6 8992.03 555.373  20
   1  -4   6 8666.31 483.645   4
  -1  -4  -7 3281.51 361.797  20
  -1  -4  -7 3365.96 366.902  21
   1  -4   7 3455.10 380.423   1
  -1  -4  -8 24833.2 551.773  13
  -1  -4  -8 25841.5 547.753  23
  -1  -4  -9 3983.88 165.154  13
  -1  -4 -10 3935.40 158.797  13
  -1  -4 -11-19.4070 26.8848  13
   1  -4  12 487.460 41.4072  11
  -1  -3  12 1023.26 58.1419  11
   1  -3 -11 1799.05 92.4603  13
  -1  -3  11 1974.47 97.0522  11
   1  -3 -11 1763.32 91.2547  23
  -1  -3  11 1918.69 93.6077  22
   1  -3 -10 88.5747 28.7052  13
   1  -3 -10 72.2109 31.8895  23
  -1  -3  10 133.947 34.6809  22
  -1  -3   9 4603.90 176.332  22
   1  -3  -9 4802.86 176.539  13
   1  -3  -9 4686.19 172.962  23
  -1  -3   8 4333.12 166.873  22
   1  -3  -8 4338.94 162.750  13
   1  -3  -8 4459.75 164.946  23
   1  -3  -7 1311.14 198.989  18
  -1  -3   7 1151.25 219.105   1
   1  -3  -6 31669.6 1018.53  18
   1  -3  -6 30683.8 974.657  20
  -1  -3   6 30690.9 1128.54   1
   1  -3  -5 28555.9 859.071  20
  -1  -3   5 28594.5 993.486   1
   1  -3  -4 48638.9 1105.26  19
  -1  -3   4 50319.9 1064.17   4
  -1  -3   4 46422.8 1257.94   1
   1  -3  -4 47483.1 1242.14  18
   1  -3  -4 46254.3 1113.23  20
  -1  -3   3 16115.1 570.350   1
   1  -3  -3 15258.9 511.172  19
  -1  -3   3 14781.5 411.511   4
   1  -3  -3 17218.9 585.099  18
   1  -3  -3 16290.5 476.719  20
   1  -3  -2 65964.1 1397.43  18
   1  -3  -2 61427.1 1352.56  19
  -1  -3   2 64175.1 1172.33   4
   1  -3  -2 66022.9 1242.13  20
  -1  -3   2 61935.1 1360.89   1
   1  -3  -1 40511.9 878.812  18
  -1  -3   1 39169.9 782.944   6
  -1  -3   1 37039.6 881.438  21
  -1  -3   1 36912.4 849.389   1
   1  -3   0 466487. 7924.87  18
  -1  -3   0 473232. 7831.53   6
   1  -3   0 472054. 7841.97  21
  -1  -3   0 473911. 7923.09   1
  -1  -3   0 468701. 8031.56  21
   1  -3   1 634296. 10286.7  19
  -1  -3  -1 587193. 10378.2  19
   1  -3   2 154055. 2835.71  19
  -1  -3  -2 159567. 2989.87  21
   1  -3   2 156122. 2974.96   1
  -1  -3  -2 154196. 2984.25  20
  -1  -3  -2 163395. 2996.52  18
  -1  -3  -3 46368.1 1171.98  20
  -1  -3  -3 44982.1 1147.53  21
  -1  -3  -3 46009.9 1129.92  18
   1  -3   3 46922.1 1168.79   1
   1  -3   3 50183.9 1034.70  19
  -1  -3  -3 50524.6 1040.25  19
   1  -3   4 6090.68 335.334   4
  -1  -3  -4 6713.06 350.746  18
   1  -3   4 6437.41 373.641   1
  -1  -3  -4 6727.12 385.637  20
  -1  -3  -4 6850.75 378.548  21
  -1  -3  -5 53501.1 1376.35  18
  -1  -3  -5 58127.2 1510.53  20
  -1  -3  -5 56765.2 1469.58  21
   1  -3   5 55368.4 1489.12   1
   1  -3   5 56452.7 1383.16   4
  -1  -3  -6 4403.38 375.664  20
   1  -3   6 3933.78 355.619   1
  -1  -3  -6 4315.03 364.100  21
  -1  -3  -6 3712.27 301.182  18
   1  -3   6 4181.08 321.835   4
  -1  -3  -7 12213.6 687.907  21
   1  -3   7 11405.5 681.090   1
  -1  -3  -7 11799.3 694.011  20
   1  -3   7 12321.1 621.779   4
  -1  -3  -8 10534.2 289.451  13
  -1  -3  -9 609.081 63.6812  13
  -1  -3 -10 3874.29 159.113  13
  -1  -3 -11 293.088 43.7514  13
   1  -3  12 186.543 30.3787  11
  -1  -3 -12 148.184 27.8447  13
  -1  -2  12 894.231 57.1885  11
   1  -2 -12 894.500 53.9330  13
  -1  -2  11 261.870 37.4717  22
   1  -2 -11 201.791 35.7614  23
   1  -2 -11 223.830 37.1909  13
  -1  -2  11 206.561 38.0808  11
   1  -2 -10 3374.59 142.845  13
  -1  -2  10 3321.34 142.098  11
  -1  -2  10 3333.73 141.071  22
   1  -2 -10 3316.08 138.971  23
   1  -2  -9 20124.7 461.551  13
   1  -2  -9 20410.5 459.595  23
  -1  -2   9 20457.7 466.408  22
   1  -2  -8 12024.5 306.031  13
  -1  -2   8 11847.8 310.697  22
   1  -2  -7 2574.45 267.450  18
   1  -2  -7 2455.71 269.099  20
  -1  -2   7 2685.56 333.451   1
  -1  -2   6 1427.74 220.112   1
   1  -2  -6 1370.86 189.427  18
   1  -2  -6 1467.47 184.796  20
  -1  -2   6 1531.62 178.987   4
   1  -2  -5 14342.9 629.747  18
   1  -2  -5 14247.8 531.617  20
  -1  -2   5 13061.2 613.999   1
  -1  -2   5 13765.3 511.918   4
  -1  -2   4 111350. 2003.85   5
   1  -2  -4 108347. 2354.85  18
   1  -2  -4 110562. 2130.41  20
  -1  -2   4 117152. 2115.86   4
  -1  -2   4 112665. 2313.37   1
   1  -2  -3 31163.0 715.305  20
   1  -2  -3 31080.6 807.983  19
   1  -2  -3 30022.1 887.324  18
  -1  -2   3 30308.0 686.616   4
  -1  -2   3 31360.5 839.001   1
   1  -2  -2 139753. 2639.72  19
  -1  -2   2 139951. 2620.70   1
  -1  -2   2 143450. 2442.72   4
   1  -2  -2 143180. 2489.17  20
  -1  -2   1 614986. 10269.5   1
  -1  -2   0 85598.5 1539.40   1
  -1  -2   0 84145.3 1542.89   6
   1  -2   1 383122. 6362.81  18
   1  -2   1 393929. 6441.22  19
   1  -2   2 999999. 16275.1   1
  -1  -2  -2 979409. 16255.3  18
   1  -2   2 985783. 16113.7  19
  -1  -2  -2 942440. 16166.2  19
  -1  -2  -3 126165. 2471.18  20
   1  -2   3 128841. 2248.37  19
  -1  -2  -3 124063. 2372.02  18
   1  -2   3 118881. 2423.39   1
   1  -2   3 117607. 2391.40   4
  -1  -2  -3 131137. 2441.66  21
  -1  -2  -3 131293. 2233.64  19
  -1  -2  -4 59738.9 1400.17  21
  -1  -2  -4 60179.8 1327.78  18
  -1  -2  -4 62580.5 1450.87  20
   1  -2   4 60400.4 1421.83   1
   1  -2   4 61055.6 1376.65   4
   1  -2   5 88375.9 1940.81   4
  -1  -2  -5 88015.6 2034.23  20
  -1  -2  -5 88912.4 1867.85  18
   1  -2   5 85067.9 1996.78   1
  -1  -2  -5 93507.9 2012.02  21
   1  -2   6 4010.62 300.381   5
  -1  -2  -6 4254.44 341.180  21
   1  -2   6 4349.07 357.321   1
   1  -2   6 4092.90 316.848   4
  -1  -2  -6 4048.58 355.183  20
  -1  -2  -7 9131.08 562.233  21
   1  -2   7 8611.54 567.147   1
   1  -2   7 9365.25 538.396   4
  -1  -2  -7 9287.31 602.957  20
  -1  -2  -8 9252.00 262.720   8
  -1  -2  -8 9391.74 263.476  13
   1  -2   8 8716.05 566.490   4
  -1  -2  -9 5793.10 201.932  13
  -1  -2 -10 1283.51 89.1453  13
   1  -2  11 41.5197 29.7424  11
  -1  -2 -11 38.5705 27.2491  13
   1  -2  12 460.860 43.7592  11
  -1  -2 -12 511.949 46.8876  13
  -1  -1  12 3013.99 112.238  11
   1  -1 -12 2848.66 104.467  13
   1  -1 -11 1769.37 93.7156  13
   1  -1 -11 1607.35 85.2740  23
  -1  -1  11 1728.53 94.7111  11
  -1  -1  10 10843.9 299.147  11
   1  -1 -10 11132.4 297.255  13
  -1  -1  10 11433.1 297.079  22
   1  -1 -10 10847.8 288.680  23
  -1  -1   9 22238.3 495.040  22
   1  -1  -9 22582.6 496.279  13
  -1  -1   8 4882.10 173.786  22
   1  -1  -8 4582.28 404.601  20
   1  -1  -8 5427.09 177.379  13
   1  -1  -8 5218.97 179.029   8
   1  -1  -7 986.780 172.889  20
  -1  -1   7 989.157 168.898   4
  -1  -1   6 23916.1 802.320   4
  -1  -1   6 23533.6 918.503   1
   1  -1  -6 22834.6 800.167  20
  -1  -1   5 3768.79 308.078   1
  -1  -1   5 3960.38 263.290   4
   1  -1  -5 4021.97 267.621  20
   1  -1  -5 3762.18 315.946  18
   1  -1  -4 56405.3 1395.01  18
   1  -1  -4 52943.5 1221.46  20
  -1  -1   4 55999.1 1107.47   5
  -1  -1   4 56080.4 1358.48   1
  -1  -1   4 58465.2 1240.19   4
   1  -1  -4 57942.1 1192.54  19
  -1  -1   3 36592.0 918.159   1
  -1  -1   3 36506.0 722.920   5
  -1  -1   3 37457.8 814.590   4
   1  -1  -3 38218.6 953.474  18
   1  -1  -3 36722.8 817.292  20
   1  -1  -2 99443.3 1760.64  20
  -1  -1   2 99291.2 1681.98   5
  -1  -1   2 98123.4 1754.21   4
  -1  -1   1 63111.3 1228.82   1
  -1  -1   1 65244.1 1128.14   4
   1  -1   0 411125. 6862.48  18
  -1  -1   0 423523. 6807.82   1
   1  -1   1 343309. 5775.53  19
   1  -1   1 342756. 5776.01   1
   1  -1   2 93826.8 1781.00   1
  -1  -1  -2 96255.5 1799.67   3
  -1  -1  -2 90677.6 1778.10  21
   1  -1   2 97593.0 1637.51  19
  -1  -1  -2 95561.7 1748.64  18
   1  -1   3 136453. 2565.09   4
   1  -1   3 140187. 2574.93   1
  -1  -1  -3 142621. 2614.07  20
  -1  -1  -3 142721. 2547.03   3
   1  -1   4 36615.2 929.851   4
   1  -1   4 36452.9 955.814   1
  -1  -1  -4 35670.3 843.610  18
  -1  -1  -4 38321.5 996.300  20
   1  -1   5 2001.20 209.926   1
  -1  -1  -5 2474.35 239.483  20
  -1  -1  -5 2222.42 169.558  18
   1  -1   5 2190.74 196.056   5
  -1  -1  -6 16448.6 733.639  20
   1  -1   6 16208.9 699.555   1
   1  -1   6 16767.6 679.108   4
   1  -1   6 15840.8 629.200   5
  -1  -1  -7 8321.06 513.991  21
   1  -1   7 8472.10 472.016   5
   1  -1   7 8581.12 518.223   4
  -1  -1  -7 8054.23 547.748  20
   1  -1   7 8396.98 541.364   1
  -1  -1  -8 4342.39 162.143   8
  -1  -1  -8 4420.51 162.368  13
  -1  -1  -9 2747.55 130.061  13
  -1  -1  -9 2609.23 127.782   8
  -1  -1 -10 9800.57 280.716  13
   1  -1  11 127.012 35.4244  11
  -1  -1 -11 133.142 39.6672  13
  -1  -1 -12 26.4913 22.9200  13
   1  -1  12 46.9371 24.2410  11
  -1   0  12 367.315 41.4092  11
   1   0 -12 288.936 34.2806  13
   1   0 -11 768.749 62.6571  13
  -1   0  11 908.158 70.3444  11
  -1   0  10 174.056 36.2301  22
   1   0 -10 130.867 34.1485  23
   1   0 -10 123.904 34.3643  13
  -1   0  10 98.3300 37.8628  11
   1   0  -9 9818.41 280.845   8
  -1   0   9 10548.2 289.508  11
  -1   0   9 10172.9 278.772  22
   1   0  -9 10639.5 282.768  13
   1   0  -8 71.8805 25.9718   8
   1   0  -8 228.823 114.690  20
  -1   0   8 152.485 80.1060   4
  -1   0   8 196.201 86.5050   2
   1   0  -7 359.937 106.606  20
  -1   0   7 289.688 98.0119   4
   1   0  -6 732.107 133.973  20
   1   0  -6 654.958 156.274  18
  -1   0   6 459.893 105.053   4
  -1   0   5 1602.91 169.736   4
   1   0  -5 1914.23 209.161  18
  -1   0   5 1741.59 140.212   5
   1   0  -5 1857.68 179.387  20
  -1   0   4 6829.94 362.185   1
  -1   0   4 7120.63 324.036   4
  -1   0   4 6517.80 251.562   5
   1   0  -4 6980.44 335.481  18
   1   0  -4 6323.18 328.998  17
   1   0  -4 6833.59 315.148  20
   1   0  -3 47960.7 1015.80  18
   1   0  -3 49442.4 1010.44  20
  -1   0   3 47390.4 1015.94   4
  -1   0   3 46676.9 914.234   5
  -1   0   2 235277. 4145.65   4
  -1   0   2 245967. 4058.18   5
   1   0  -1 136841. 2346.14  17
  -1   0   1 136035. 2340.12   4
  -1   0   1 137118. 2292.45   3
  -1   0   0 98700.2 1644.06   2
  -1   0   0 92152.4 1651.00  20
  -1   0  -1 249520. 4247.29  21
   1   0   1 254339. 4219.03   1
   1   0   2 60942.9 1183.43   1
  -1   0  -2 60583.8 1207.40   3
  -1   0  -2 63266.1 1121.27  18
   1   0   3 17954.1 515.614   1
   1   0   3 18089.0 521.948   5
  -1   0  -3 18035.9 507.186   3
  -1   0  -3 18968.0 430.597  18
  -1   0  -4 53426.1 1072.25  18
  -1   0  -4 55123.9 1193.94   3
   1   0   4 52402.6 1234.09   4
   1   0   4 53037.7 1218.23   5
  -1   0  -4 57592.1 1321.32  20
   1   0   4 53768.7 1240.83   1
  -1   0  -5 470.423 109.635  20
   1   0   5 345.603 87.9955   1
  -1   0  -5 318.364 74.4439   3
   1   0   5 444.462 98.1024   4
   1   0   6 24692.5 823.865   5
   1   0   6 25661.4 904.073   1
   1   0   6 25644.9 887.024   4
  -1   0  -6 27750.5 969.185  20
  -1   0  -7 45271.2 1424.17  20
   1   0   7 42013.3 1236.33   5
   1   0   7 42807.3 1338.22   4
   1   0   8 7087.55 522.976   4
  -1   0  -8 7788.38 228.328  13
  -1   0  -8 7579.71 226.763   8
  -1   0  -8 7204.85 560.026  20
  -1   0  -9 292.867 43.2242  13
  -1   0  -9 82.8720 31.0868   8
   1   0  10 394.368 51.2055  11
  -1   0 -10 437.284 54.6468   8
  -1   0 -10 470.827 55.3007  13
   1   0  11 1419.71 85.6321  11
  -1   0 -11 1476.45 91.2008  13
   1   0  12-6.74158 20.9503  11
  -1   0 -12 11.9721 21.8399  13
  -1   1  12 3025.71 113.117  11
   1   1 -12 2922.49 106.175  13
   1   1 -11 1708.55 92.2419  13
  -1   1  11 1766.94 96.9354  11
   1   1 -10 10826.2 295.577   8
  -1   1  10 11144.7 303.992  11
   1   1 -10 11040.6 294.369  13
  -1   1   9 22799.9 503.729  11
   1   1  -9 22204.6 491.410  13
   1   1  -9 22072.2 495.116   8
  -1   1   9 22530.7 492.216  22
  -1   1   8 5121.17 178.323  11
  -1   1   8 4513.64 431.469   2
   1   1  -8 4394.53 412.471  20
  -1   1   8 5149.77 174.155  22
   1   1  -8 5202.13 172.395  13
  -1   1   8 4843.75 422.737   4
   1   1  -8 5005.27 172.358   8
  -1   1   7 1378.99 222.769   2
   1   1  -7 1430.72 211.486  20
  -1   1   7 1075.11 190.295   4
   1   1  -6 23397.4 830.428  20
   1   1  -6 23154.5 844.686  18
  -1   1   6 23509.1 843.492   4
  -1   1   6 24264.8 886.902   2
   1   1  -5 3925.76 274.952  20
  -1   1   5 3928.59 229.004   5
  -1   1   5 4221.36 293.412   4
   1   1  -5 3892.14 285.045  17
   1   1  -5 3522.97 253.960  18
   1   1  -4 53244.0 1184.57  18
  -1   1   4 56284.7 1166.92   5
  -1   1   4 58290.3 1291.92   4
   1   1  -4 54891.7 1270.43  17
   1   1  -3 35455.5 671.218   3
  -1   1   3 34621.8 848.535   4
  -1   1   2 97464.4 1749.96   5
  -1   1   2 98425.8 1821.52   4
  -1   1   1 68053.2 1230.63   5
  -1   1   0 417904. 6913.64   6
  -1   1   0 407101. 6832.63  20
   1   1   0 418757. 6836.24   4
   1   1   0 419125. 6872.52   5
   1   1   1 343926. 5745.40   4
  -1   1  -1 344051. 5666.82  21
  -1   1  -1 338140. 5749.11  20
  -1   1  -2 97675.4 1827.73   3
   1   1   3 137540. 2547.67   4
   1   1   3 137091. 2531.77   5
   1   1   3 138813. 2516.27   1
  -1   1  -3 133543. 2305.03  18
  -1   1  -3 140951. 2586.76  20
  -1   1  -3 141140. 2528.84   3
  -1   1  -4 38525.1 927.287   3
   1   1   4 38978.7 953.934   5
   1   1   4 37892.2 971.961   4
  -1   1  -4 37485.6 1004.25  20
  -1   1  -5 2367.44 190.613   3
  -1   1  -5 2054.45 219.662  20
   1   1   5 2285.82 201.850   5
   1   1   5 2121.52 207.325   4
  -1   1  -6 18366.1 773.883  20
   1   1   6 17034.9 704.483   4
   1   1   7 8158.49 476.071   5
   1   1   7 8292.70 529.284   4
  -1   1  -7 8359.01 551.779  20
  -1   1  -8 4461.47 165.038   8
  -1   1  -8 4792.66 168.783  13
   1   1   9 2790.36 128.258  11
  -1   1  -9 2563.34 126.782   8
  -1   1  -9 2751.33 130.037  13
  -1   1 -10 9456.85 277.188   8
   1   1  10 9702.46 271.961  11
  -1   1 -10 10262.3 283.540  13
   1   1  11 112.306 33.2393  11
  -1   1 -11 141.449 36.7201  13
   1   1  12 15.0194 20.1626  11
  -1   1 -12 9.04587 21.5985  13
  -1   2  12 979.668 60.9501  11
   1   2 -12 877.852 54.3822  13
  -1   2  11 229.571 40.6756  11
   1   2 -11 270.411 41.6399  13
  -1   2  10 3320.09 145.597  11
   1   2 -10 3302.82 139.481  13
   1   2 -10 3450.22 143.215   8
   1   2  -9 19992.7 451.345  13
  -1   2   9 20084.7 462.832  11
   1   2  -9 19773.0 452.239   8
  -1   2   8 12010.2 310.253  11
   1   2  -8 11856.2 302.175   8
  -1   2   7 2525.06 292.070   2
   1   2  -7 2971.27 306.123  20
  -1   2   7 2739.45 301.632   4
  -1   2   6 1430.56 193.584   4
  -1   2   6 1316.35 189.078   2
   1   2  -6 1385.50 199.970  17
   1   2  -6 1235.10 179.944  20
  -1   2   5 14363.4 513.414   5
  -1   2   5 14103.8 590.049   2
  -1   2   5 13645.5 577.206   4
   1   2  -5 14212.9 572.460  20
   1   2  -5 13477.8 564.737  17
   1   2  -5 14132.5 496.309  18
   1   2  -4 111300. 2002.14   3
  -1   2   4 113573. 2153.94   5
   1   2  -4 108873. 2208.82  17
  -1   2   4 112485. 2265.28   4
  -1   2   4 106874. 2248.04   2
   1   2  -3 31386.8 771.850  17
  -1   2   3 29591.6 727.352   5
  -1   2   3 31553.0 806.839   2
  -1   2   3 29804.8 790.338   4
  -1   2   2 141910. 2545.09   5
   1   2  -1 609456. 10044.3   5
  -1   2   1 601389. 10137.2   5
   1   2   0 88076.4 1498.28   4
   1   2   0 86654.2 1555.88   5
  -1   2   0 85325.3 1548.61   6
  -1   2  -1 374275. 6407.96  17
   1   2   1 387773. 6370.83   2
   1   2   1 380585. 6478.75   4
  -1   2  -2 973283. 16209.1  20
  -1   2  -2 962017. 16224.6   3
  -1   2  -2 976649. 16135.0  17
   1   2   2 969144. 16204.8   4
   1   2   2 981115. 16094.8   2
  -1   2  -3 127773. 2366.66  17
   1   2   3 125290. 2402.17   5
  -1   2  -3 127804. 2405.42   3
   1   2   3 128043. 2416.36   4
  -1   2  -3 124827. 2420.47  20
  -1   2  -4 59601.2 1360.31   3
   1   2   4 61124.0 1382.61   5
  -1   2  -4 61334.4 1391.10  17
  -1   2  -4 65413.2 1454.56  20
   1   2   4 61990.8 1416.86   4
  -1   2  -5 90681.1 1893.33   3
   1   2   5 86283.2 1929.39   5
   1   2   5 92794.7 2019.00   4
  -1   2  -5 89115.2 2021.12  20
   1   2   6 4310.81 317.875   5
  -1   2  -6 4508.33 361.450  20
   1   2   6 4416.65 347.941   4
   1   2   6 3911.42 297.801   2
   1   2   7 8423.89 496.116   5
  -1   2  -7 8937.26 589.689  20
   1   2   7 9482.62 573.829   4
   1   2   8 9739.85 262.205  11
  -1   2  -8 9445.68 265.750   8
   1   2   9 5867.60 197.189  11
  -1   2  -9 5930.13 204.354   8
  -1   2  -9 6095.11 206.187  13
   1   2  10 1433.53 90.1130  11
  -1   2 -10 1367.86 92.0868  13
  -1   2 -10 1445.78 93.9983   8
  -1   2 -11 33.9422 20.8903  12
   1   2  11 47.2396 27.1698  11
  -1   2 -11 63.5327 30.6001   8
  -1   2 -11 61.8939 31.9589  13
  -1   2 -12 503.946 46.2512  13
   1   2  12 460.860 42.1095  11
   1   3 -12 957.837 54.5958  13
  -1   3  12 959.330 58.7624  11
   1   3 -11 1902.63 93.4710  13
  -1   3  11 2028.98 100.860  11
   1   3 -11 1876.14 94.5778   8
  -1   3  10 80.2224 29.1640  11
   1   3 -10 78.8662 29.8901   8
   1   3 -10 58.3423 25.7238  13
   1   3  -9 4611.40 169.324  13
   1   3  -9 4650.92 169.815   8
  -1   3   9 4514.55 175.083  11
  -1   3   8 4368.79 146.992   9
   1   3  -8 4431.69 160.422   8
  -1   3   8 4309.59 163.931  11
   1   3  -7 1140.70 203.418  20
   1   3  -7 1200.95 213.887  17
  -1   3   7 975.732 190.014   2
  -1   3   7 1293.36 215.929   4
  -1   3   6 29977.4 1023.86   2
   1   3  -6 30919.7 1044.93  20
  -1   3   6 30289.9 1048.15   4
  -1   3   6 30374.7 930.477   5
   1   3  -6 29931.6 1034.26  17
  -1   3   5 30240.9 866.983   5
   1   3  -5 29402.6 912.884  17
  -1   3   5 30584.6 944.436   2
   1   3  -5 27626.3 770.768  18
  -1   3   5 28775.4 940.209   4
  -1   3   4 48068.5 1133.45   5
  -1   3   4 44074.0 1165.72   2
   1   3  -4 46054.5 1157.60  17
  -1   3   4 47191.3 1214.87   4
   1   3  -4 48203.0 1023.32   3
  -1   3   3 15565.9 502.964   5
   1   3  -3 15418.9 518.973  17
  -1   3   3 15329.1 542.115   4
  -1   3   3 15063.8 521.573   2
   1   3  -2 62502.9 1287.33  17
  -1   3   2 62159.9 1285.89   5
  -1   3   2 61973.9 1323.24   4
  -1   3   2 57995.6 1283.96   2
  -1   3   1 38606.2 876.084   5
   1   3  -1 37894.4 789.387   5
  -1   3   1 37456.6 767.695   6
  -1   3   1 39343.1 876.063   2
   1   3   0 482854. 7954.47   5
  -1   3   0 468208. 7857.05   6
   1   3   1 595973. 10439.2   5
   1   3   1 619777. 10288.1   2
  -1   3  -1 632920. 10334.8  17
   1   3   1 633004. 10395.3   4
  -1   3  -2 165205. 2877.44  17
   1   3   2 167821. 2975.72   4
   1   3   2 163486. 2986.44   5
  -1   3  -2 165385. 3003.62   3
   1   3   2 159774. 2830.67   2
  -1   3  -3 46070.5 1018.16  17
   1   3   3 46759.6 976.492   2
  -1   3  -3 47537.9 1098.25   3
   1   3   3 43620.5 1075.13   5
   1   3   3 47675.9 1102.29   4
   1   3   4 6363.79 341.418   5
  -1   3  -4 6360.88 355.055  20
   1   3   4 6712.82 304.039   2
  -1   3  -4 6695.31 332.492  17
  -1   3  -4 6306.69 336.489   3
  -1   3  -5 58060.7 1432.95  17
  -1   3  -5 55613.3 1470.03  20
   1   3   5 57630.5 1421.03   5
  -1   3  -5 58181.1 1394.95   3
   1   3   5 58112.9 1470.39   4
   1   3   5 56163.3 1337.50   2
   1   3   6 4209.17 353.556   4
  -1   3  -6 4333.70 362.866  20
   1   3   6 3945.41 317.907   5
  -1   3  -7 13136.9 723.003  20
   1   3   7 12140.0 624.445   5
   1   3   7 13163.6 702.874   4
  -1   3  -8 10270.8 285.667   8
   1   3   8 10797.0 283.029  11
  -1   3  -9 646.134 65.0123  13
  -1   3  -9 544.666 59.7804   8
   1   3   9 665.095 63.4229  11
   1   3  10 4203.81 159.156  11
  -1   3 -10 4432.34 169.272  13
  -1   3 -10 4283.57 166.350   8
   1   3  11 191.510 33.9876  11
  -1   3 -11 286.588 43.7899  13
  -1   3 -11 240.954 33.8780  12
  -1   3 -11 220.026 39.3155   8
   1   3  12 189.312 28.3827  11
  -1   3 -12 193.193 29.7516  13
  -1   4  12 320.936 33.3481  11
   1   4 -12 278.207 28.0776  13
  -1   4  11 130.239 30.1760  11
   1   4 -11 106.327 28.4895   8
   1   4 -11 90.5553 27.2040  13
  -1   4  10 3192.66 138.564  11
   1   4 -10 3107.34 132.299  13
   1   4 -10 3308.63 135.671   8
  -1   4   9 3972.54 159.704  11
   1   4  -9 3634.39 150.090   8
  -1   4   8 11417.4 276.314   9
  -1   4   8 11193.6 301.497  11
   1   4  -8 10974.4 290.590   8
  -1   4   7 6684.68 510.142   4
   1   4  -7 6835.52 516.596  17
   1   4  -7 7516.87 537.318  20
  -1   4   7 7463.59 504.480   2
  -1   4   6 6345.37 405.022   5
   1   4  -6 7102.59 477.270  20
  -1   4   6 6984.96 454.847   2
  -1   4   6 7196.89 486.841   4
   1   4  -6 6706.21 456.664  17
  -1   4   5 2339.65 236.529   2
  -1   4   5 1877.63 228.727   4
  -1   4   5 1855.85 199.276   5
   1   4  -5 1883.99 213.633  17
   1   4  -4 101274. 2185.78  17
  -1   4   4 105430. 2213.65   2
  -1   4   4 108252. 2201.60   5
  -1   4   4 103249. 2267.86   4
  -1   4   3 27051.9 781.933   5
   1   4  -3 27768.2 785.670  17
  -1   4   3 25364.9 803.079   4
  -1   4   3 26722.3 773.987   2
  -1   4   2 14083.5 491.200   5
  -1   4   2 13166.7 469.812   2
   1   4  -2 13060.5 462.638  17
   1   4  -1 20826.7 557.164   5
  -1   4   1 22158.2 635.685   5
   1   4  -1 20546.6 599.272  17
  -1   4   1 22025.2 621.315   2
  -1   4   1 21327.0 472.052   6
  -1   4   0 3073.74 154.017  17
   1   4   0 3254.18 186.885   5
  -1   4  -1 53494.7 1035.30  17
   1   4   1 50049.8 1073.34   4
   1   4   1 52167.9 1130.27   5
   1   4   1 50077.6 981.298   2
   1   4   2 75020.0 1630.95   5
   1   4   2 79993.0 1612.48   4
   1   4   2 78995.1 1475.90   2
  -1   4  -2 80142.2 1530.52  17
   1   4   3 48146.5 1194.96   5
  -1   4  -3 51203.6 1217.42   3
   1   4   3 50121.7 1204.04   4
  -1   4  -3 51168.5 1113.71  17
   1   4   3 50748.5 1055.50   2
   1   4   4 66189.0 1531.59   5
  -1   4  -4 61057.5 1434.51  17
  -1   4  -4 65548.5 1542.57  20
  -1   4  -4 65279.4 1527.43   3
   1   4   4 65550.8 1547.54   4
  -1   4  -5 48051.8 1284.15   3
   1   4   5 46981.1 1288.24   5
  -1   4  -5 48086.8 1272.09  17
  -1   4  -5 47059.9 1331.44  20
   1   4   5 47688.0 1323.40   4
  -1   4  -6 9199.16 552.508  20
   1   4   6 9041.30 515.155   5
   1   4   6 9176.67 545.897   4
   1   4   7 3401.67 354.128   4
   1   4   7 3216.70 326.260   5
  -1   4  -7 3310.00 360.159  20
  -1   4  -8 25526.3 554.167   8
   1   4   8 25783.2 547.636  11
   1   4   9 3823.72 153.568  11
  -1   4  -9 4041.54 162.616   8
   1   4  10 3795.70 147.903  11
  -1   4 -10 3785.54 153.393   8
  -1   4 -10 3963.72 157.031  13
   1   4  11 2.53716 21.9989  11
  -1   4 -11 9.44259 22.9352   8
  -1   4 -11 5.26098 24.0539  13
  -1   4 -12 519.587 35.2138  12
   1   4  12 496.885 38.3111  11
  -1   4 -12 609.008 45.4469  13
  -1   5  12 23.5868 15.2483  11
  -1   5  11 741.450 56.6653  11
   1   5 -11 691.419 51.9465  13
   1   5 -11 691.813 52.4309   8
   1   5 -10 2282.25 108.836   8
  -1   5  10 2359.81 113.775  11
   1   5 -10 2342.49 109.808  13
  -1   5   9 555.603 60.4921  11
   1   5  -9 531.154 54.9007   8
  -1   5   8 2764.21 111.590   9
   1   5  -8 2500.46 118.411   8
  -1   5   8 2525.63 124.398  11
  -1   5   7 1750.40 97.0184  11
  -1   5   7 1655.28 84.0435   9
   1   5  -7 1740.82 92.8928   8
  -1   5   6 108.448 78.1545   2
   1   5  -6 99.0370 84.4908  17
  -1   5   6 57.5029 48.9832   5
  -1   5   6 185.446 92.4036   4
  -1   5   5 2354.21 246.369   5
  -1   5   5 2937.39 269.694   2
  -1   5   5 2472.41 277.074   4
   1   5  -5 2527.84 256.773  17
   1   5  -4 37409.7 1055.75  17
  -1   5   4 36413.4 1118.65   4
  -1   5   4 36115.8 1060.66   5
  -1   5   4 34240.4 1020.48   2
   1   5  -3 42392.1 1106.58  17
  -1   5   3 41254.9 1092.31   2
  -1   5   3 42849.4 1137.31   5
   1   5  -2 37758.1 971.206  17
  -1   5   2 36106.1 966.685   2
  -1   5   2 36927.9 1005.55   5
   1   5  -1 16192.5 558.079  17
  -1   5   1 17733.5 600.809   5
  -1   5   1 16835.4 562.583   2
  -1   5   0 38791.4 877.582  17
   1   5   0 36867.5 969.409  17
  -1   5   0 39682.7 983.192   2
   1   5   0 41553.6 971.413   5
   1   5   1 12107.8 454.040   5
  -1   5  -1 11501.3 382.782  17
  -1   5  -2 51222.1 1122.33  17
   1   5   2 52551.4 1199.09   4
   1   5   2 50647.8 1229.29   5
  -1   5  -3 37711.2 1036.75   3
   1   5   3 36161.5 1014.62   5
   1   5   3 35575.0 987.784   4
  -1   5  -3 36582.9 903.165  17
  -1   5  -4 53465.9 1400.48   3
   1   5   4 51294.2 1380.08   5
   1   5   4 49946.9 1364.91   4
  -1   5  -5 1748.30 202.667  17
  -1   5  -5 1979.02 227.026   3
   1   5   5 2257.54 243.617   5
  -1   5  -5 1856.27 229.995  20
   1   5   5 2363.57 257.401   4
  -1   5  -6 5898.61 455.652  20
   1   5   6 5401.73 412.749   5
   1   5   6 5496.82 429.992   4
   1   5   7 13375.9 328.363  11
  -1   5  -7 13413.2 335.381   8
  -1   5  -8 3356.50 146.017   8
   1   5   8 3485.41 143.801  11
   1   5   9 2578.57 122.070  11
  -1   5  -9 2666.01 127.207   8
  -1   5 -10 106.579 34.3274  13
   1   5  10 113.420 31.5093  11
  -1   5 -10 65.2548 29.9789   8
  -1   5 -11 291.778 38.7021   8
  -1   5 -11 265.612 37.4501  13
   1   5  11 242.664 32.7869  11
  -1   5 -12 632.626 41.9418  13
   1   6 -11 594.536 44.7099   8
  -1   6  11 547.595 46.8179  11
   1   6 -11 608.115 45.7280  13
  -1   6  10 1170.84 76.4614  11
   1   6 -10 1155.49 73.2031  13
   1   6 -10 1185.75 72.9107   8
  -1   6   9 626.043 61.5965  11
   1   6  -9 640.303 58.8624   8
  -1   6   8 5912.42 175.884   9
   1   6  -8 5656.43 191.299   8
  -1   6   8 5726.22 198.590  11
   1   6  -7 1078.09 74.0409   8
  -1   6   7 946.353 74.1266  11
  -1   6   7 999.581 65.1644   9
   1   6  -6 2795.76 309.278  17
  -1   6   6 2732.89 298.138   5
  -1   6   6 2991.82 341.002   4
   1   6  -5 9244.09 522.568  17
  -1   6   5 8359.62 490.421   2
  -1   6   5 8924.43 566.973   4
  -1   6   5 8891.66 531.680   5
   1   6  -4 13441.4 596.510  17
  -1   6   4 11649.0 588.886   5
  -1   6   4 13572.1 591.701   2
  -1   6   3 9237.35 459.100   2
  -1   6   3 9965.55 505.291   5
   1   6  -3 8475.23 439.692  17
   1   6  -2 68306.5 1587.77  17
  -1   6   2 68453.9 1589.42   2
  -1   6   2 71095.1 1671.96   5
   1   6  -1 14190.8 552.529  17
  -1   6   1 14992.1 559.521   2
   1   6   0 6216.54 350.984  17
  -1   6   0 6483.56 297.022  17
  -1   6   0 6879.84 353.689   2
   1   6   0 6539.74 345.578   5
  -1   6  -1 9358.81 365.456  17
   1   6   1 9327.09 433.440   5
   1   6   2 5716.01 347.743   5
   1   6   3 20908.4 764.624   5
  -1   6  -3 22116.3 797.123   3
   1   6   3 21059.0 743.063   4
  -1   6  -4 9906.80 529.909   3
   1   6   4 9141.28 498.979   4
   1   6   4 8538.29 492.419   5
   1   6   5 8761.02 525.784   5
  -1   6  -5 9632.53 553.631   3
   1   6   5 9011.69 541.186   4
  -1   6  -5 9752.61 569.114  20
  -1   6  -6 7172.58 524.446  20
   1   6   6 6718.25 483.560   5
   1   6   6 6534.67 492.557   4
   1   6   7 9726.36 265.291  11
  -1   6  -7 9840.26 272.338   8
  -1   6  -7 9561.93 251.179  16
  -1   6  -8 6799.75 220.981   8
   1   6   8 7033.15 217.627  11
   1   6   9 1553.47 91.4122  11
  -1   6  -9 1533.84 93.9960   8
   1   6  10 454.250 46.5810  11
  -1   6 -10 533.968 53.9208  13
  -1   6 -10 523.493 53.5106   8
   1   6  11 152.746 24.6042  11
  -1   6 -11 184.782 29.2274   8
  -1   6 -11 198.031 30.8608  13
  -1   7  11 624.823 43.5425  11
   1   7 -11 594.576 39.5352   8
   1   7 -11 611.941 41.8810  13
  -1   7  10 2365.82 103.876  11
   1   7 -10 2395.23 101.499  13
   1   7 -10 2397.25 99.6590   8
  -1   7   9-5.77714 30.5984  11
   1   7  -9 16.6250 22.9225   8
  -1   7   8 818.169 70.8205  11
  -1   7   8 777.621 56.5559   9
   1   7  -8 741.421 64.4281   8
  -1   7   7 11284.9 304.337  11
  -1   7   7 11175.5 277.379   9
   1   7  -7 11558.6 297.617   8
  -1   7   6 384.908 41.2825   9
  -1   7   6 336.449 46.3018  11
  -1   7   5 16435.8 791.467   5
   1   7  -5 16742.7 751.498  17
   1   7  -4 6422.05 423.304  17
  -1   7   4 6168.62 404.087   2
  -1   7   4 6913.48 481.168   5
   1   7  -3 3944.96 313.477  17
  -1   7   3 4038.43 307.888   2
  -1   7   3 3800.40 335.258   5
  -1   7   2 12017.7 590.459   5
  -1   7   2 12176.3 544.443   2
   1   7  -2 11743.1 538.561  17
   1   7  -1 2020.89 213.011  17
  -1   7   1 2111.09 211.830   2
   1   7   0 4374.96 310.981   5
   1   7   0 4726.69 325.206  17
   1   7   1 37185.1 1089.33   5
   1   7   2 16580.3 685.540   5
   1   7   3 732.180 146.902   5
  -1   7  -3 654.596 136.131   3
   1   7   4 13369.1 650.224   4
  -1   7  -4 12975.1 668.320   3
   1   7   4 13567.3 673.570   5
  -1   7  -5 5120.25 425.151  20
   1   7   5 4727.29 407.479   5
   1   7   5 4469.96 395.142   4
  -1   7  -5 5498.61 439.344   3
   1   7   6 18919.5 425.469  11
  -1   7  -6 19545.9 426.322  16
   1   7   7 1838.07 99.1466  11
  -1   7  -7 1891.12 106.277   8
  -1   7  -7 1784.99 94.2842  16
  -1   7  -8 1897.14 105.480   8
   1   7   8 2195.90 108.172  11
  -1   7  -9 515.981 54.7618   8
   1   7   9 591.145 55.4438  11
  -1   7 -10 286.446 38.5796   8
  -1   7 -10 268.138 39.0928  13
   1   7  10 289.990 34.9996  11
   1   7  11 18.1489 13.9690  11
  -1   7 -11 18.8692 16.7686   8
  -1   7 -11 38.2024 17.8183  12
  -1   7 -11 31.4990 19.3323  13
  -1   8  10 149.859 28.4706  11
   1   8 -10 118.197 25.7189  13
   1   8 -10 152.156 26.0784   8
  -1   8   9 1876.17 94.9537  11
   1   8  -9 1920.76 93.0432   8
  -1   8   8 547.955 57.5141  11
   1   8  -8 627.797 56.9988   8
  -1   8   8 646.500 50.2784   9
   1   8  -7 1899.24 94.9215  16
  -1   8   7 1975.86 94.2744   9
  -1   8   7 2039.46 109.079  11
   1   8  -7 1990.91 104.886   8
  -1   8   6 1518.64 81.8972   9
  -1   8   6 1387.98 89.7699  11
  -1   8   5 651.662 61.1885  11
  -1   8   5 793.622 58.7154   9
   1   8  -5 733.371 59.7246   7
  -1   8   4 17458.7 836.193   5
   1   8  -4 17364.2 764.249  17
   1   8  -3 10777.6 565.645  17
  -1   8   3 10988.2 627.124   5
   1   8  -2 12602.3 598.997  17
  -1   8   2 12882.4 592.905   2
   1   8  -1 262.629 88.5044  17
   1   8   0 19565.0 772.172  17
   1   8   1 1739.14 216.095   5
   1   8   1 1529.21 202.640  17
   1   8   2 2837.60 295.827   5
   1   8   3 5213.84 417.767   5
  -1   8  -3 6289.15 463.142   3
  -1   8  -4 3861.72 147.970  16
   1   8   4 3522.41 356.713   5
  -1   8  -4 3717.82 365.189   3
  -1   8  -4 3530.62 134.572   7
  -1   8  -5 9038.98 251.324  16
  -1   8  -5 8805.81 246.388   7
  -1   8  -6 5065.61 173.806  16
   1   8   7 5722.91 185.569  11
  -1   8  -7 5598.73 182.473  16
  -1   8  -7 5711.06 194.862   8
   1   8   8 521.327 52.1374  11
  -1   8  -8 513.168 49.0968  16
  -1   8  -8 548.448 58.9991   8
  -1   8  -9 672.237 57.5603   8
   1   8   9 729.498 54.4557  11
   1   8  10 816.701 48.2024  11
  -1   8 -10 876.271 56.8791   8
  -1   8 -10 812.760 56.2291  13
  -1   9  10 1214.33 57.8554  11
   1   9 -10 1246.83 58.2822  13
  -1   9   9 598.846 50.5752  11
   1   9  -9 522.320 44.8192   8
  -1   9   8 5939.26 167.007   9
  -1   9   8 5847.86 185.004  11
   1   9  -8 5780.00 179.682   8
  -1   9   7 1600.30 93.8366  11
   1   9  -7 1431.99 80.5876  16
   1   9  -7 1670.73 95.1459   8
  -1   9   7 1637.45 83.8710   9
  -1   9   6 2361.80 106.824   9
   1   9  -6 2499.64 115.720  16
  -1   9   6 2227.91 115.954  11
  -1   9   5 305.711 41.6476   9
  -1   9   5 310.006 43.3113  11
  -1   9   4 4881.61 163.451   9
   1   9  -4 4689.50 160.096   7
  -1   9   4 4816.14 171.301  11
   1   9  -3 7745.49 215.494   7
  -1   9   3 7849.47 230.432  11
   1   9  -2 11736.9 607.844  17
   1   9  -1 7653.72 481.487  17
   1   9   0 139.650 84.6561  17
   1   9   1 5979.43 436.279  17
  -1   9  -2 8824.35 234.793   7
   1   9   2 7260.79 496.604  17
  -1   9  -2 8743.03 581.089   3
   1   9   2 7472.58 518.745   5
  -1   9  -3 4197.50 151.246   7
  -1   9  -4 7490.32 225.707  16
  -1   9  -4 6922.74 212.590   7
  -1   9  -5 706.014 63.9737  16
  -1   9  -5 609.936 59.8305   7
  -1   9  -6 13601.2 334.056  16
  -1   9  -7 1415.84 82.1246  16
  -1   9  -7 1436.35 92.1489   8
  -1   9  -8 335.145 39.5190  16
  -1   9  -8 371.690 46.9096   8
  -1   9  -9 1656.64 83.9402   8
  -1   9 -10 672.864 44.9041  13
  -1   9 -10 700.821 44.8891   8
  -1   9 -10 696.231 42.2593  12
   1  10  -9 172.755 24.1000   8
  -1  10   9 229.223 28.9857  11
   1  10  -8 454.208 38.0871  16
  -1  10   8 574.464 49.8842  11
   1  10  -8 575.071 47.2927   8
  -1  10   7 76.5675 27.9818  11
   1  10  -7 22.5611 20.8299  16
   1  10  -7 53.4638 25.1248   8
  -1  10   6 354.836 42.4170   9
  -1  10   6 316.576 45.1984  11
   1  10  -6 301.916 44.8011  16
  -1  10   5 6396.97 208.844  11
  -1  10   5 6851.74 203.043   9
  -1  10   4 9475.27 261.143  11
   1  10  -4 8756.38 244.088   7
  -1  10   3 147.142 35.2093  11
   1  10  -3 105.701 28.4779   7
  -1  10   2 15470.3 368.843  11
   1  10  -2 15382.8 351.467   7
  -1  10   1 4550.09 159.306   7
   1  10  -1 4704.89 153.858   7
  -1  10   1 4473.03 162.524  11
  -1  10   0 4214.80 152.047   7
  -1  10  -1 2218.40 106.873   7
  -1  10  -2 8712.79 243.631   7
  -1  10  -3 7147.86 221.236  16
  -1  10  -3 6752.97 211.069   7
  -1  10  -4 15009.2 360.646  16
  -1  10  -4 14235.4 353.544   7
  -1  10  -5 4189.83 158.011  16
  -1  10  -5 4516.09 164.430   7
  -1  10  -6 358.815 45.4877  16
  -1  10  -7 505.067 48.8812  16
  -1  10  -7 511.514 52.2914   8
  -1  10  -8 311.785 34.3047  16
  -1  10  -8 293.207 38.9161   8
  -1  10  -9 468.957 40.5950   8
  -1  11   8 368.059 34.8909  11
   1  11  -8 258.445 26.1477  16
   1  11  -8 349.260 31.9858   8
   1  11  -7 942.301 57.4874  16
  -1  11   7 1115.55 65.9542  11
   1  11  -7 1056.68 63.1953   8
  -1  11   6 748.168 59.7879  11
   1  11  -6 731.421 57.8632   8
   1  11  -6 718.696 56.7950  16
  -1  11   5 4201.42 155.676  11
   1  11  -5 4670.94 161.256  16
   1  11  -4 4612.53 159.425   7
  -1  11   4 4952.32 171.845  11
  -1  11   3 938.052 71.3794  11
   1  11  -3 998.850 68.1817   7
  -1  11   3 950.779 68.9840   7
   1  11  -2 2823.64 118.415   7
  -1  11   2 3059.34 130.584  11
  -1  11   2 2843.28 122.280   7
  -1  11   1 8297.99 234.907   7
   1  11  -1 8165.68 226.052   7
  -1  11   0 6375.71 199.510   7
  -1  11  -1 7370.19 221.424   7
  -1  11  -1 7600.43 222.615  16
  -1  11  -2 1789.15 98.8207  16
  -1  11  -2 1660.05 94.1590   7
  -1  11  -3 2854.07 127.479  16
  -1  11  -3 2784.51 124.791   7
  -1  11  -4 885.181 70.0366  16
  -1  11  -4 1039.76 74.9468   7
  -1  11  -5 2205.38 106.120  16
  -1  11  -5 2288.36 108.658   7
  -1  11  -6 453.793 46.6000  16
  -1  11  -6 578.575 55.6806   8
  -1  11  -7 323.563 36.6256  16
  -1  11  -7 359.775 41.4304   8
  -1  11  -8 1529.68 65.6666  16
  -1  11  -8 1713.07 75.9204   8
  -1  12   7 178.265 21.8582   7
   1  12  -7 177.478 23.4812   8
   1  12  -7 142.429 21.6419  16
  -1  12   6 125.206 26.4816  11
   1  12  -6 149.697 26.9358  16
   1  12  -6 140.278 26.3180   8
  -1  12   6 83.0420 20.5731   7
  -1  12   5 1438.92 78.1353  11
  -1  12   5 1454.29 74.4611   7
   1  12  -5 1491.88 80.0589  16
  -1  12   4 262.696 36.3923   7
   1  12  -4 406.090 51.3877  16
  -1  12   4 377.308 45.8049  11
   1  12  -3 365.414 43.2109   7
  -1  12   3 334.187 41.8501   7
  -1  12   2 1109.71 72.7427   7
   1  12  -2 1065.17 68.9755   7
   1  12  -1 10667.4 265.889   7
  -1  12   1 10238.5 269.727   7
  -1  12   0 294.942 43.0609   7
  -1  12  -1 6796.52 200.098  16
  -1  12  -1 7001.95 207.597   7
  -1  12  -2 782.171 61.2580  16
  -1  12  -2 873.284 66.1788   7
  -1  12  -3 1943.53 98.0139  16
  -1  12  -3 2002.27 100.079   7
  -1  12  -4 4393.59 152.627   7
  -1  12  -4 4211.55 148.954  16
  -1  12  -5 1213.55 72.4357  16
  -1  12  -6 677.751 53.0299   8
  -1  12  -6 696.730 50.2806  16
  -1  12  -7 106.146 21.5294  16
  -1  12  -7 119.440 24.0421   8
   1  13  -6 446.885 32.3465   8
   1  13  -6 454.848 33.9688  16
   1  13  -5 567.191 42.9426  16
  -1  13   5 522.575 37.6538   7
   1  13  -5 541.081 41.1915   8
   1  13  -4 1755.57 82.0981  16
  -1  13   4 1789.72 77.3516   7
  -1  13   3 688.431 50.8258   7
   1  13  -3 729.673 56.6789  16
   1  13  -2 3933.31 138.204  16
  -1  13   2 3680.77 127.700   7
   1  13  -2 3585.26 123.591   7
  -1  13   1 5285.09 163.252   7
  -1  13   0 3470.08 127.660   7
  -1  13  -1 2348.04 96.1670  16
  -1  13  -1 2411.79 104.318   7
  -1  13  -2 642.376 50.8781  16
  -1  13  -2 588.364 51.8628   7
  -1  13  -3 4275.88 139.962  16
  -1  13  -3 4426.61 144.379   7
  -1  13  -4 64.2304 21.3339  16
  -1  13  -4 56.2655 21.6586   7
  -1  13  -5 646.781 45.6433  16
  -1  13  -5 659.026 48.8414   8
  -1  13  -6 283.402 28.5191  16
  -1  13  -6 305.362 30.7133   8
   1  14  -5 1418.71 55.3638  16
   1  14  -4 26.9301 16.4286  16
   1  14  -4 11.4848 13.0627   8
  -1  14   3 824.447 45.3219   7
   1  14  -3 807.113 48.7733  16
   1  14  -2 382.392 35.8619  16
  -1  14   2 337.084 32.2717   7
   1  14  -1 733.118 47.1001  16
  -1  14   1 752.995 48.4650   7
  -1  14   0 1339.42 66.3166   7
  -1  14  -1 937.446 55.4314   7
  -1  14  -2 584.833 40.9733  16
  -1  14  -2 711.743 47.4407   7
  -1  14  -3-8.35015 16.7046  16
  -1  14  -3-6.55421 18.8672   7
  -1  14  -4 15.5071 13.8462  16
  -2 -14   4 114.168 21.2303  15
  -2 -14   3 1183.66 59.2729  22
  -2 -14   3 1245.88 60.3755  15
  -2 -14   2 2797.87 97.3688  15
  -2 -14   1 1146.43 58.6498  15
   2 -14   0 6027.26 178.767  22
   2 -14   1 964.336 63.7745  22
   2 -14   2 677.274 53.1272  22
   2 -14   3 627.804 48.2509  22
   2 -14   4 74.8226 19.1565  22
  -2 -13   6 636.186 43.8312  22
  -2 -13   6 636.295 39.7799  15
  -2 -13   5 288.283 35.6643  22
   2 -13  -5 275.255 32.2901  23
  -2 -13   5 315.662 34.7349  15
  -2 -13   4 3698.05 133.008  22
  -2 -13   4 3938.85 129.615  15
   2 -13  -4 3589.42 125.017  23
  -2 -13   3 72.0559 27.7757  22
  -2 -13   3 82.1503 27.5028  15
  -2 -13   2 3034.91 118.718  15
  -2 -13   2 2987.42 122.026  22
  -2 -13   1 460.588 45.5643  15
  -2 -13   1 363.167 43.0746  22
  -2 -13   0 2024.90 89.6348  15
   2 -13   1 2269.25 113.228  22
  -2 -13  -1 2353.24 119.105  23
   2 -13   2 603.547 59.0001  22
  -2 -13  -2 544.668 57.7244  23
  -2 -13  -3 728.669 63.8459  23
   2 -13   3 771.118 63.4927  22
   2 -13   4 1976.44 93.7128  22
  -2 -13  -4 1904.52 96.8821  23
   2 -13   5 267.087 34.0208  22
  -2 -13  -5 236.265 35.3610  23
  -2 -13  -6 2.71093 15.7068  23
   2 -12  -7 473.001 40.0490  23
  -2 -12   7 469.626 41.0950  22
  -2 -12   7 407.560 31.9776  15
  -2 -12   6 279.534 36.8850  22
  -2 -12   6 248.605 32.6140  15
   2 -12  -6 215.423 32.4221  23
  -2 -12   5 569.067 55.1117  22
   2 -12  -5 469.177 48.7678  23
  -2 -12   5 551.470 51.5679  15
   2 -12  -4 1488.45 88.1134  23
  -2 -12   4 1598.51 89.5360  15
  -2 -12   4 1447.23 90.1268  22
  -2 -12   3 144.626 35.8940  22
  -2 -12   3 153.807 36.2315  15
   2 -12  -3 125.233 31.6239  23
  -2 -12   2 1487.48 87.1105  15
  -2 -12   2 1323.31 88.2554  22
  -2 -12   1 7990.54 229.153  15
  -2 -12   1 7887.43 236.865  22
  -2 -12   0 13326.9 353.365  23
  -2 -12   0 12752.8 312.314  15
  -2 -12  -1 412.581 60.6385  23
  -2 -12  -2 229.928 47.4182  23
   2 -12   2 180.695 40.3464  22
  -2 -12  -3 2780.09 139.286  23
   2 -12   3 2774.19 130.916  22
   2 -12   4 2754.44 125.414  22
  -2 -12  -4 2748.27 133.356  23
   2 -12   5 58.8591 27.3349  22
  -2 -12  -5 82.1518 31.7782  23
  -2 -12  -6 817.689 63.5570  23
   2 -12   6 943.990 60.9310  22
  -2 -12  -7 1164.48 63.7331  23
  -2 -11   8 1015.80 59.9863  22
   2 -11  -8 933.593 58.4469  23
  -2 -11   7 114.828 30.2223  22
  -2 -11   7 112.353 23.9685  15
   2 -11  -7 88.9099 27.6831  23
   2 -11  -6 225.228 40.6327  23
  -2 -11   6 215.421 36.7006  15
  -2 -11   6 244.509 41.8611  22
  -2 -11   5 2127.81 113.597  22
   2 -11  -5 1933.76 107.086  23
  -2 -11   5 2095.94 104.737  15
  -2 -11   4 1196.46 87.9998  22
   2 -11  -4 1328.44 89.8779  23
  -2 -11   3 4668.05 181.361  22
   2 -11  -3 4665.22 176.490  23
  -2 -11   2 1558.85 99.2867  22
  -2 -11   1 1706.83 109.494  23
  -2 -11   1 1727.28 102.411  22
  -2 -11   0 4600.23 189.665  23
  -2 -11  -1 4620.13 190.353  23
  -2 -11  -2 1999.34 122.020  23
   2 -11   3 4969.89 189.103  22
  -2 -11  -3 5116.19 199.781  23
   2 -11   4 5245.30 193.241  22
  -2 -11  -4 5382.36 203.320  23
   2 -11   5 3427.53 145.314  22
  -2 -11  -5 3395.52 152.798  23
   2 -11   6 1020.46 72.4173  22
  -2 -11  -6 964.454 75.1735  23
  -2 -11  -7 144.962 33.1430  23
   2 -11   7 180.191 29.7534  22
  -2 -11  -8 1120.71 61.3952  23
  -2 -10   9 249.891 32.4182  22
   2 -10  -9 284.512 34.4733  23
  -2 -10   8 1572.68 87.7076  22
   2 -10  -8 1495.54 83.9248  23
  -2 -10   7 321.028 47.5678  22
   2 -10  -7 393.414 49.8234  23
  -2 -10   7 357.335 40.8491  15
  -2 -10   6 1257.28 91.2637  22
  -2 -10   6 1359.65 82.5240  15
   2 -10  -6 1287.37 89.6160  23
   2 -10  -5 1109.89 83.8611  23
  -2 -10   5 1277.43 91.7965  22
  -2 -10   4 212.135 42.9342  22
   2 -10  -4 223.661 42.3690  23
  -2 -10   3 17890.4 435.271  22
   2 -10  -3 18042.1 432.485  23
  -2 -10   2 1890.73 108.256  22
  -2 -10   1 7086.14 225.529  22
  -2 -10   1 7003.88 237.906  23
  -2 -10   0 2356.41 129.355  23
  -2 -10  -1 187.414 44.9374  23
  -2 -10  -2 819.552 78.6674  23
  -2 -10  -3 2954.72 148.465  23
  -2 -10  -4 734.351 74.9073  23
   2 -10   4 733.326 70.9739  22
  -2 -10  -5 3207.24 151.429  23
   2 -10   5 3227.54 146.765  22
  -2 -10  -6 926.679 80.8266  23
   2 -10   6 963.043 75.4977  22
   2 -10   7 500.178 51.0842  22
  -2 -10  -7 457.276 53.6437  23
  -2 -10  -8 941.698 64.8099  23
  -2  -9  10 121.680 23.3626  22
   2  -9 -10 122.173 23.4358  23
  -2  -9   9 1518.54 83.4426  22
   2  -9  -9 1498.19 84.4490  23
  -2  -9   8 302.310 46.6203  22
   2  -9  -8 292.223 45.7255  23
  -2  -9   7 560.919 62.8410  22
  -2  -9   7 547.279 50.2020  15
   2  -9  -7 509.149 59.2521  23
  -2  -9   6 1372.36 96.1233  22
   2  -9  -6 1367.41 93.3972  23
   2  -9  -5 3175.05 145.874  23
  -2  -9   5 3199.03 149.470  22
  -2  -9   4 1543.78 99.2749  22
   2  -9  -4 1528.43 97.8786  23
  -2  -9   3 2799.71 133.260  22
   2  -9  -3 2870.29 132.973  23
  -2  -9   2 970.033 75.2036  22
  -2  -9   2 1035.86 82.3018  23
  -2  -9   1 263.224 44.9687  23
   2  -9  -1 283.550 115.531   1
  -2  -9   0 59.4020 25.0613  23
   2  -9   0 129.457 100.802  19
   2  -9   0-84.7844 65.4148   1
   2  -9   1 1558.24 244.370  19
  -2  -9  -1 1795.52 107.272  23
   2  -9   1 1737.10 268.915   1
  -2  -9  -1 1709.32 257.549  21
  -2  -9  -2 724.915 70.2973  23
  -2  -9  -3 594.672 64.4126  23
   2  -9   4 12781.5 337.244  22
  -2  -9  -4 12101.9 342.801  23
   2  -9   5 7253.29 234.406  22
  -2  -9  -5 6706.21 236.520  23
  -2  -9  -6 1116.92 87.8926  23
   2  -9   6 1106.60 83.1429  22
   2  -9   7 1610.98 93.9789  22
  -2  -9  -7 1577.42 100.456  23
  -2  -9  -8 3332.12 137.725  23
  -2  -9  -9 844.807 56.0486  23
  -2  -8  10 610.812 50.0406  22
   2  -8 -10 530.020 47.8689  23
   2  -8  -9 484.736 53.8675  23
  -2  -8   9 492.373 54.8213  22
  -2  -8   8 454.343 57.2112  22
   2  -8  -8 435.899 55.6632  23
  -2  -8   7 8663.86 269.091  22
   2  -8  -7 8393.52 261.766  23
  -2  -8   6 1741.67 110.672  22
   2  -8  -6 1499.56 100.698  23
  -2  -8   5 680.612 67.2237  22
   2  -8  -5 617.404 63.6938  23
  -2  -8   4 6849.39 221.825  22
   2  -8  -4 6422.24 454.565  19
   2  -8  -4 7091.19 220.963  23
   2  -8  -3 8759.54 523.900  19
   2  -8  -3 8492.37 568.926  18
   2  -8  -2 9702.80 548.209  19
   2  -8  -2 9879.12 593.907  18
   2  -8  -1 851.274 164.793  19
  -2  -8   1 1105.09 192.305  21
  -2  -8   0 3017.24 313.602  21
   2  -8   0 2642.07 313.094   1
   2  -8   0 3091.28 306.010  19
   2  -8   1 1660.80 230.549  19
  -2  -8  -1 1418.82 236.153  21
   2  -8   1 1555.05 240.978   1
   2  -8   2-36.8102 92.2870  19
   2  -8   2-19.0181 81.0268   1
  -2  -8  -2-16.6617 67.5014  21
  -2  -8  -3 5804.73 497.858  21
   2  -8   3 5280.76 426.848  19
   2  -8   3 5659.55 486.949   1
  -2  -8  -4 11959.3 331.624  23
   2  -8   4 12722.6 325.645  22
   2  -8   5 1462.70 93.3536  22
  -2  -8  -5 1454.27 99.8400  23
  -2  -8  -6 4061.45 172.599  23
   2  -8   6 4075.43 163.167  22
   2  -8   7 5479.19 189.183  22
  -2  -8  -7 5326.92 199.550  23
  -2  -8  -8 3677.98 151.406  23
  -2  -7  11 1479.42 67.2090  22
   2  -7 -11 1316.18 65.7365  23
   2  -7 -10 68.3643 26.5187  23
  -2  -7  10 73.5712 26.3558  22
  -2  -7   9-10.5014 31.6126  22
   2  -7  -9 1.10534 28.7117  23
  -2  -7   8 1412.33 97.9849  22
   2  -7  -8 1461.67 96.2825  23
  -2  -7   7 3764.81 164.407  22
   2  -7  -7 3584.36 154.437  23
  -2  -7   6 352.491 51.6582  22
   2  -7  -6 314.558 46.5227  23
  -2  -7   5 583.215 60.9471  22
   2  -7  -5 530.318 55.6354  23
   2  -7  -4 42248.9 1371.63  18
   2  -7  -4 42828.9 1240.07  19
  -2  -7   4 42327.7 1383.24   1
   2  -7  -3 43919.3 1338.04  18
   2  -7  -3 41013.0 1205.43  19
  -2  -7   3 45375.6 1348.86   1
   2  -7  -2 15149.0 639.810  19
   2  -7  -2 15810.6 695.816  18
  -2  -7   2 16979.1 701.012   1
   2  -7  -1 27590.0 893.677  19
  -2  -7   1 27854.0 972.843  21
   2  -7  -1 25841.9 908.007  18
   2  -7   0 38898.8 1108.80  19
  -2  -7   0 38578.3 1204.41  21
   2  -7   1 38246.8 1241.05   1
   2  -7   1 39243.6 1145.51  19
  -2  -7  -1 37224.7 1222.87  21
  -2  -7  -2 805.623 172.217  21
   2  -7   2 1158.39 178.280  19
   2  -7   2 771.424 175.160   1
   2  -7   3 2461.62 262.360  19
  -2  -7  -3 2651.56 317.742  21
   2  -7   3 2471.84 302.120   1
  -2  -7  -4 5356.24 480.455  21
   2  -7   4 6148.85 502.214   1
   2  -7   5 1760.63 99.1651  22
  -2  -7  -5 1852.95 105.909  23
   2  -7   6 39334.3 784.229  22
  -2  -7  -6 39664.4 802.828  23
  -2  -7  -7 1152.03 87.3426  23
  -2  -7  -8 1475.33 96.3538  23
  -2  -6  11 34.8970 19.3995  22
   2  -6 -11 23.1565 20.8223  23
  -2  -6  10 256.368 40.8301  22
   2  -6 -10 302.926 44.2847  23
  -2  -6   9 5661.14 200.784  22
   2  -6  -9 5231.80 189.382  23
  -2  -6   8 5465.35 204.975  22
   2  -6  -8 5417.97 196.885  23
   2  -6  -7 2837.63 133.862  23
  -2  -6   7 3208.08 148.064  22
  -2  -6   6 4815.26 180.365  22
   2  -6  -6 4458.30 397.218  21
   2  -6  -6 4747.46 171.771  23
  -2  -6   6 4263.06 428.676   1
   2  -6  -5 20005.0 826.648  21
   2  -6  -5 20220.0 872.635  18
  -2  -6   5 20233.6 911.432   1
   2  -6  -4 705.438 132.877  21
   2  -6  -4 771.557 156.497  18
  -2  -6   4 374.806 127.992   1
   2  -6  -4 821.560 135.437  19
  -2  -6   3 15792.9 684.274   1
   2  -6  -3 16169.2 672.754  18
   2  -6  -3 15355.5 602.647  21
   2  -6  -3 15825.4 605.181  19
   2  -6  -2 5097.70 314.825  19
   2  -6  -2 4625.00 324.711  18
  -2  -6   2 5392.96 348.351   1
   2  -6  -1 44774.5 1187.05  18
  -2  -6   1 44857.7 1274.02  21
   2  -6  -1 48378.8 1178.33  19
  -2  -6   1 44615.4 1167.81   1
   2  -6   0 31902.2 907.320  19
  -2  -6   0 31805.8 1013.80  21
   2  -6   0 30777.2 888.754  18
   2  -6   1 1272.12 158.843  19
   2  -6   1 1299.00 188.598   1
  -2  -6  -1 1145.64 172.396  19
  -2  -6  -1 1423.34 196.615  21
   2  -6   2 28214.1 858.259  19
   2  -6   2 26706.0 968.273   1
  -2  -6  -2 26398.6 902.252  19
  -2  -6  -2 28699.6 1001.01  21
  -2  -6  -3 24093.6 945.358  21
   2  -6   3 23154.7 792.632  19
   2  -6   3 23173.2 905.610   1
   2  -6   4 18324.8 841.117   1
  -2  -6  -4 17968.1 853.161  21
  -2  -6  -5 3726.28 399.491  21
   2  -6   5 4536.88 429.441   1
   2  -6   5 3976.68 354.768   4
  -2  -6  -6 22456.0 499.327  23
  -2  -6  -6 21963.6 493.556  13
  -2  -6  -7 3352.73 147.218  23
  -2  -6  -7 3290.49 147.975  13
   2  -5 -11 931.252 63.5923  23
  -2  -5  11 996.765 64.1807  22
   2  -5 -10 2147.40 108.006  23
  -2  -5  10 2157.22 111.858  22
  -2  -5   9 3468.24 154.095  22
   2  -5  -9 3031.59 138.379  23
   2  -5  -8 2270.22 118.649  23
  -2  -5   8 2430.38 128.499  22
   2  -5  -7 10524.0 287.100  23
  -2  -5   7 10525.1 299.679  22
  -2  -5   6 5866.13 496.248   1
   2  -5  -6 6172.56 456.804  18
   2  -5  -5 28034.4 995.954  18
   2  -5  -5 26714.5 819.862  19
  -2  -5   5 26586.7 1029.47   1
   2  -5  -4 52360.1 1401.69  18
   2  -5  -4 52966.3 1294.82  19
  -2  -5   4 48473.2 1417.98   1
   2  -5  -3 675.886 121.180  19
   2  -5  -3 819.834 135.069  18
   2  -5  -2 9094.74 414.824  19
   2  -5  -2 8420.43 409.547  18
   2  -5  -2 8465.32 359.386  21
  -2  -5   2 8857.35 422.383   1
   2  -5  -1 19135.5 618.239  18
   2  -5  -1 19918.1 636.056  19
  -2  -5   1 19203.4 702.231  21
  -2  -5   1 19425.2 614.862   1
   2  -5   0 41104.9 996.454  19
   2  -5   0 39193.6 960.892  18
  -2  -5   0 39457.4 930.195   1
  -2  -5   0 39045.0 1111.65  21
  -2  -5  -1 74362.6 1759.53  19
  -2  -5  -1 78098.8 1811.43  21
   2  -5   1 77783.9 1777.52   1
   2  -5   1 77607.6 1626.18  19
   2  -5   2 27668.3 770.720  19
   2  -5   2 28658.6 924.087   1
  -2  -5  -2 27151.3 918.944  21
  -2  -5  -3 105568. 2417.53  21
   2  -5   3 104417. 2162.95  19
   2  -5   3 109437. 2380.64   1
   2  -5   4 71289.2 1862.39   1
  -2  -5  -4 72673.0 1905.23  21
  -2  -5  -4 74274.3 1896.70  20
   2  -5   5 17144.4 745.710   4
   2  -5   5 15801.1 782.941   1
  -2  -5  -5 17439.7 834.228  21
  -2  -5  -5 16678.6 800.171  20
  -2  -5  -6 10722.8 676.590  20
   2  -5   6 11513.9 692.425   1
  -2  -5  -6 10911.7 694.870  21
   2  -5   6 10791.4 600.560   4
  -2  -5  -7 2274.11 118.180  13
  -2  -5  -8 5446.94 198.005  13
  -2  -5  -9 3562.59 153.747  13
   2  -4 -12 383.118 34.4307  23
  -2  -4  11 886.416 63.3845  22
   2  -4 -11 921.615 63.9521  23
  -2  -4  10 748.085 58.4046  11
   2  -4 -10 685.668 62.7571  23
  -2  -4  10 812.666 68.5714  22
   2  -4  -9 5001.81 183.090  23
  -2  -4   9 4995.14 191.316  22
  -2  -4   8 7221.93 238.429  22
   2  -4  -8 7376.28 229.015  23
   2  -4  -7 3181.61 325.605  18
  -2  -4   7 3494.76 148.011  22
  -2  -4   7 3527.23 400.732   1
   2  -4  -7 3383.27 138.972  23
   2  -4  -6 10207.6 582.909  18
  -2  -4   6 8914.15 596.515   1
   2  -4  -5 45678.4 1186.35  19
   2  -4  -5 48566.7 1378.82  18
   2  -4  -4 5114.06 369.921  18
   2  -4  -4 5199.31 337.335  19
  -2  -4   4 4650.69 347.880   1
  -2  -4   3 135327. 2679.87   1
   2  -4  -3 128273. 2666.60  19
   2  -4  -3 128162. 2698.13  18
  -2  -4   2 20131.8 585.679   6
   2  -4  -2 20730.0 682.506  18
   2  -4  -2 20357.0 700.736  19
  -2  -4   2 20463.1 648.342   1
  -2  -4   1 35782.4 980.850  21
   2  -4  -1 36747.5 968.052  19
   2  -4  -1 37442.1 911.682  18
  -2  -4   1 34024.8 815.902   6
  -2  -4   1 34968.9 862.720   1
  -2  -4   0 6478.39 351.275  21
  -2  -4   0 6298.62 244.500   6
   2  -4   0 6395.66 313.004  19
  -2  -4   0 5930.39 244.634   1
   2  -4   0 6460.20 272.818  18
  -2  -4  -1 406988. 7363.77  21
   2  -4   1 422481. 7080.04  18
  -2  -4  -1 413314. 7054.12   1
   2  -4   1 420922. 7184.10  19
   2  -4   1 427660. 7342.61   1
   2  -4   2 10101.8 364.907  19
  -2  -4  -2 9259.12 459.245  21
   2  -4   2 9932.56 456.131   1
  -2  -4  -3 58276.6 1468.75  21
  -2  -4  -3 54026.1 1438.87  20
   2  -4   3 55547.8 1404.89   1
   2  -4   3 55633.9 1217.63  19
   2  -4   4 43744.4 1252.44   1
  -2  -4  -4 43347.0 1289.59  21
  -2  -4  -4 43074.7 1287.58  20
  -2  -4  -5 9359.49 562.015  21
   2  -4   5 9603.13 551.897   1
  -2  -4  -5 10044.3 584.992  20
   2  -4   5 9140.27 507.381   4
  -2  -4  -6 930.493 197.171  20
  -2  -4  -6 1016.96 204.411  21
   2  -4   6 1025.50 202.248   1
   2  -4   6 733.499 158.080   4
   2  -4   7 2129.37 293.704   1
   2  -4   7 2267.82 279.466   4
  -2  -4  -7 2553.42 120.630  13
  -2  -4  -8 2305.69 120.607  13
  -2  -4  -9 3182.56 146.182  13
  -2  -4 -10 540.875 57.9641  13
  -2  -4 -11 820.544 62.4743  13
   2  -4  12 211.420 27.1005  11
   2  -3 -12 93.9423 22.1662  23
  -2  -3  11 1538.63 79.3172  11
   2  -3 -11 1660.65 87.7127  23
  -2  -3  11 1729.05 90.2868  22
  -2  -3  10 1302.16 81.6615  11
  -2  -3  10 1427.98 93.2934  22
   2  -3 -10 1324.29 86.8205  23
   2  -3  -9 27229.8 581.897  23
  -2  -3   9 27177.9 595.531  22
  -2  -3   8 4486.40 175.753  22
   2  -3  -8 4505.00 169.186  23
   2  -3  -7 7570.68 509.195  18
  -2  -3   7 7448.70 580.179   1
  -2  -3   6 19832.6 890.794   1
   2  -3  -6 18065.7 818.007  18
   2  -3  -5 45007.0 1399.77  18
   2  -3  -5 45007.2 1259.29  19
   2  -3  -4 25704.5 887.541  19
   2  -3  -4 27481.0 978.468  18
  -2  -3   4 27915.1 903.424   1
   2  -3  -3 62268.8 1587.45  18
   2  -3  -3 61681.6 1523.98  19
  -2  -3   3 63636.9 1466.56   1
  -2  -3   2 260451. 4508.63   1
  -2  -3   2 244772. 4481.91   6
   2  -3  -2 255462. 4666.68  19
   2  -3  -2 248833. 4669.10  18
  -2  -3   1 74356.6 1504.33   6
   2  -3  -1 73888.4 1675.79  19
  -2  -3   1 76232.3 1486.73   1
   2  -3  -1 73176.8 1616.15  18
  -2  -3   1 79653.0 1632.56  21
   2  -3   0 135568. 2403.76  18
  -2  -3   0 129998. 2271.60   1
  -2  -3   0 132571. 2359.26   6
  -2  -3  -1 63742.3 1443.08  21
  -2  -3  -1 64907.0 1311.95   6
  -2  -3  -1 65573.7 1181.33   1
   2  -3   1 66741.8 1228.17  18
   2  -3   1 67008.0 1391.43  19
  -2  -3  -2 216598. 3983.13  20
   2  -3   2 219861. 3736.94  19
  -2  -3  -2 202746. 3949.40  21
   2  -3   2 208898. 3898.76   1
   2  -3   3 13182.6 389.189  19
  -2  -3  -3 13620.8 572.408  20
   2  -3   3 13459.8 520.844   1
  -2  -3  -3 12850.1 541.746  21
   2  -3   4 4588.21 315.386   4
  -2  -3  -4 4775.90 352.845  20
  -2  -3  -4 4587.79 336.515  21
   2  -3   4 4881.40 327.821   1
   2  -3   5 46642.6 1338.50   1
   2  -3   5 48288.2 1313.19   4
  -2  -3  -5 47718.1 1423.72  20
  -2  -3  -5 48799.4 1395.31  21
   2  -3   6 2272.88 269.131   1
  -2  -3  -6 2611.61 300.906  21
  -2  -3  -6 2603.43 315.813  20
   2  -3   6 2310.26 255.371   4
  -2  -3  -7 6158.54 524.442  20
   2  -3   7 5861.99 434.699   5
  -2  -3  -7 6610.29 516.389  21
   2  -3   7 5786.53 472.889   1
   2  -3   7 6679.31 477.043   4
  -2  -3  -8 6990.49 226.070  13
  -2  -3  -9 53.8921 32.2103  13
  -2  -3 -10 1038.69 78.2909  13
  -2  -3 -11 587.988 55.7910  13
   2  -3  12 1919.71 79.9837  11
  -2  -2  12 1954.87 77.7165  11
   2  -2 -12 1838.97 78.5783  23
  -2  -2  11 601.747 52.0454  11
  -2  -2  11 567.683 54.1476  22
   2  -2 -11 587.762 53.9600  23
  -2  -2  10 652.046 60.1583  11
   2  -2 -10 702.045 65.1378  23
  -2  -2  10 760.501 69.1332  22
  -2  -2   9 27069.6 577.942  11
   2  -2  -9 27723.4 588.134  23
  -2  -2   9 27893.2 598.709  22
  -2  -2   8 15491.8 384.426  22
   2  -2  -7 8904.12 568.243  18
   2  -2  -6 18765.2 876.427  18
  -2  -2   6 24163.3 966.850   1
   2  -2  -5 2404.94 235.509  19
  -2  -2   5 2210.56 252.445   1
   2  -2  -5 2668.89 300.844  18
   2  -2  -4 3235.86 245.396  19
   2  -2  -4 3623.22 323.483  18
  -2  -2   4 3158.50 261.681   1
   2  -2  -4 2782.14 174.730  20
   2  -2  -3 2060.43 117.213  20
   2  -2  -3 1997.63 181.730  19
   2  -2  -3 2455.04 232.898  18
  -2  -2   3 1990.37 107.917   4
  -2  -2   3 2076.00 185.671   1
   2  -2  -2 141529. 2401.92  20
   2  -2  -2 149069. 2699.26  19
   2  -2  -2 143112. 2755.44  18
  -2  -2   2 140544. 2648.10   1
  -2  -2   1 201206. 3551.51   6
  -2  -2   1 203686. 3469.60   1
   2  -2   0 194993. 3362.14  18
  -2  -2   0 181265. 3356.99   6
  -2  -2   0 189702. 3170.31   2
   2  -2   0 194233. 3448.83  19
  -2  -2   0 188993. 3188.38   1
  -2  -2  -1 114057. 2080.35   6
   2  -2   1 111184. 2002.63  18
  -2  -2  -1 108382. 2155.12  21
   2  -2   1 113666. 2170.46  19
  -2  -2  -2 16653.2 566.232  20
  -2  -2  -2 16697.1 548.344  21
   2  -2   2 16845.9 451.963  19
   2  -2   2 16567.0 505.445   1
  -2  -2  -3 19236.2 646.951  21
   2  -2   3 19777.1 454.027  19
   2  -2   3 18988.1 600.822   1
  -2  -2  -3 20737.7 692.777  20
  -2  -2  -4 11466.9 537.615  20
   2  -2   4 11145.1 477.973   1
  -2  -2  -4 10702.9 495.044  21
   2  -2   4 11459.9 495.503   4
   2  -2   5 14162.5 605.730   4
   2  -2   5 14210.4 611.631   1
  -2  -2  -5 15516.4 653.389  21
  -2  -2  -6 66680.4 1743.70  21
  -2  -2  -6 69425.3 1865.50  20
   2  -2   6 65716.3 1685.50   4
   2  -2   6 63275.1 1639.15   5
   2  -2   6 60651.1 1670.09   1
  -2  -2  -7 1881.71 260.778  21
   2  -2   7 1650.27 242.280   1
   2  -2   7 1872.07 238.934   5
  -2  -2  -7 1776.67 279.955  20
   2  -2   7 1606.32 233.133   4
  -2  -2  -8 10730.1 294.403  13
  -2  -2  -9 1368.84 91.7737  13
  -2  -2 -10 1271.37 88.2617  13
   2  -2  11 459.518 50.2484  11
  -2  -2 -11 421.953 49.4341  13
   2  -2  12 2395.55 92.2831  11
  -2  -2 -12 2283.11 95.0997  13
  -2  -1  12 905.970 54.6563  11
   2  -1 -12 895.800 53.5889  23
  -2  -1  11 205.124 34.9927  11
   2  -1 -11 229.150 36.6261  23
  -2  -1  10 9815.54 273.440  11
   2  -1 -10 10165.1 277.137  23
  -2  -1  10 10004.9 280.718  22
  -2  -1   9 7985.25 239.563  11
  -2  -1   9 7969.91 245.844  22
  -2  -1   8 3074.86 131.001  11
  -2  -1   8 3175.00 139.379  22
   2  -1  -7 17259.4 852.741  18
   2  -1  -6 4902.59 427.540  18
   2  -1  -6 6174.36 369.086  20
   2  -1  -5 28537.5 809.303  20
  -2  -1   5 30188.2 837.236   4
   2  -1  -5 29000.0 1007.09  18
   2  -1  -4 55054.8 1163.81  20
  -2  -1   4 51032.2 1336.22   1
  -2  -1   4 52626.9 1171.42   4
   2  -1  -4 55515.9 1366.23  18
   2  -1  -3 7636.91 261.957  20
   2  -1  -3 7998.33 356.761  18
   2  -1  -3 7263.97 313.112  17
  -2  -1   3 6922.80 347.758   1
  -2  -1   3 7199.66 262.275   4
   2  -1  -2 229541. 3874.96  17
  -2  -1   2 214385. 3958.70   1
  -2  -1   1 117787. 2181.65   6
   2  -1  -1 117770. 2016.59  17
  -2  -1   1 114484. 2088.37   2
   2  -1  -1 113608. 2108.28  18
  -2  -1   0 187434. 3099.07   2
   2  -1   0 181244. 3038.51  17
  -2  -1   0 181529. 3265.13  21
  -2  -1  -1 110161. 2066.82   6
   2  -1   1 114284. 2012.24   1
  -2  -1  -1 107853. 2084.22  21
  -2  -1  -1 111596. 2110.57  20
  -2  -1  -2 18055.6 562.470   3
   2  -1   2 19741.2 505.748  19
   2  -1   2 18254.2 496.215   1
  -2  -1  -2 20461.7 611.873  20
  -2  -1  -2 20137.8 566.094  21
   2  -1   3 95234.9 1908.86   4
  -2  -1  -3 93053.1 1899.19  21
   2  -1   3 95684.3 1619.66  19
  -2  -1  -3 90897.8 1902.54   3
  -2  -1  -3 92813.8 1963.11  20
   2  -1   3 87592.4 1823.07   1
   2  -1   4 14538.7 530.769   1
  -2  -1  -4 15394.9 565.097  21
  -2  -1  -4 14933.4 608.251  20
   2  -1   4 15678.1 571.443   4
  -2  -1  -4 16065.3 574.577   3
  -2  -1  -5 26222.1 833.262  21
  -2  -1  -5 24024.3 877.110  20
   2  -1   5 21667.1 760.668   5
   2  -1   5 24115.6 803.608   4
   2  -1   5 23443.8 779.080   1
  -2  -1  -6 4186.34 337.666  21
   2  -1   6 3943.34 320.416   5
  -2  -1  -6 4705.87 405.214  20
   2  -1   6 4891.52 359.888   1
   2  -1   6 4111.36 336.028   4
  -2  -1  -7 9822.22 573.964  21
  -2  -1  -7 9162.07 627.294  20
   2  -1   7 7878.96 495.676   5
   2  -1   7 9076.26 556.976   1
   2  -1   7 9457.49 562.210   4
  -2  -1  -8 3179.71 136.924   8
  -2  -1  -8 3249.54 139.109  13
  -2  -1  -9 6375.23 213.034   8
  -2  -1  -9 6594.81 217.489  13
  -2  -1 -10 5107.05 184.936  13
   2  -1  11 2359.35 107.944  11
  -2  -1 -11 2417.63 115.004  13
   2  -1  12 1093.96 61.1368  11
  -2  -1 -12 935.425 61.0365  13
  -2   0  12 186.450 28.9144  11
  -2   0  11 3992.19 145.862  11
  -2   0  11 3852.78 128.774   9
   2   0 -11 4048.39 143.389  23
  -2   0  10 495.558 56.7485  22
  -2   0  10 571.395 60.1899  11
  -2   0   9 160.006 36.2842  22
  -2   0   9 230.969 40.3295  11
  -2   0   8 796.081 65.1375  11
   2   0  -8 728.220 61.4454   8
  -2   0   8 617.544 59.3171  22
   2   0  -7 1414.14 202.311  20
   2   0  -7 1674.90 272.300  18
  -2   0   7 1506.03 242.991   2
   2   0  -6 43086.9 1346.12  18
   2   0  -6 42127.4 1176.48  20
  -2   0   6 45479.8 1354.74   2
  -2   0   6 43270.4 1216.40   4
   2   0  -5 2708.86 247.181  17
   2   0  -5 3023.84 228.506  20
   2   0  -5 2877.95 258.471  18
  -2   0   5 3102.22 242.927   4
   2   0  -4 35078.0 869.238  20
   2   0  -4 35584.6 932.689  18
   2   0  -4 33716.1 918.429  17
  -2   0   4 37135.4 911.337   4
   2   0  -3 3629.55 207.541  17
  -2   0   3 3832.19 242.029   2
   2   0  -3 4016.65 222.676  18
  -2   0   3 3839.65 204.915   4
   2   0  -2 381289. 6390.34  17
  -2   0   2 370330. 6472.18   2
   2   0  -1 108516. 1874.48  17
  -2   0   1 102165. 1876.25   3
  -2   0   1 104717. 1929.31   2
  -2   0   0 15368.7 419.312   3
   2   0   0 16504.3 364.562  17
  -2   0   0 14712.5 414.329  21
  -2   0   0 16238.3 390.502   2
   2   0   1 536308. 8766.75   1
  -2   0  -1 510222. 8907.72  20
  -2   0  -1 529584. 8878.50  21
   2   0   2 13425.1 355.199   1
  -2   0  -2 13357.8 445.816  20
  -2   0  -2 13074.8 398.940  21
   2   0   2 13395.6 422.770   4
   2   0   3 1703.12 130.113   1
  -2   0  -3 1882.45 173.216  20
  -2   0  -3 1923.30 166.061   3
   2   0   3 1971.21 165.124   4
  -2   0  -3 1808.51 146.528  21
  -2   0  -4 26416.2 748.678  21
  -2   0  -4 28198.9 842.162  20
  -2   0  -4 26677.7 782.182   3
   2   0   4 26763.3 781.763   4
   2   0   4 25886.7 732.386   1
   2   0   5 373.124 92.3993   4
  -2   0  -5 506.208 102.016  21
   2   0   5 436.629 99.8987   5
   2   0   5 338.451 81.8769   1
  -2   0  -5 671.290 137.790  20
  -2   0  -5 340.642 89.1119   3
  -2   0  -6 43211.2 1228.05  21
   2   0   6 46494.0 1281.55   1
   2   0   6 41915.6 1233.13   5
  -2   0  -6 46857.1 1414.76  20
   2   0   6 43852.0 1284.63   4
  -2   0  -6 44934.4 1239.14   3
  -2   0  -7 6128.97 500.189  20
   2   0   7 6261.66 430.458   5
   2   0   7 5583.05 431.959   4
  -2   0  -8 4272.55 161.226   8
  -2   0  -8 4482.85 165.381  13
  -2   0  -9 8310.85 250.628   8
  -2   0  -9 8358.60 251.453  13
   2   0  10-14.4171 25.9245  11
  -2   0 -10 37.1721 29.8624   8
  -2   0 -10 19.2686 29.1152  13
   2   0  11 326.373 43.5356  11
  -2   0 -11 300.719 46.3088  13
   2   0  12 188.651 28.7050  11
  -2   0 -12 139.909 29.8042  13
  -2   1  12 959.434 58.7663  11
  -2   1  11 270.772 42.5036  11
   2   1 -11 335.119 41.6341  23
  -2   1  11 325.055 35.9624   9
  -2   1  10 9993.78 277.119  11
   2   1 -10 9548.36 259.423  13
  -2   1   9 7850.55 241.138  11
   2   1  -9 8122.07 238.819   8
   2   1  -9 7646.14 225.992  13
  -2   1   9 8029.98 242.543  22
  -2   1   8 3146.55 134.876  11
  -2   1   8 3050.95 134.065  22
   2   1  -8 3210.95 131.001   8
  -2   1   7 20506.4 930.381   2
   2   1  -7 22168.1 868.248  20
  -2   1   7 21161.4 875.945   4
  -2   1   6 5236.91 405.799   2
   2   1  -6 5657.70 368.875  20
   2   1  -6 4828.12 379.016  17
  -2   1   6 5721.68 389.369   4
   2   1  -6 5544.38 400.430  18
   2   1  -5 28158.9 843.582  20
   2   1  -5 29129.4 861.539  18
   2   1  -5 27003.0 876.372  17
  -2   1   5 27679.4 939.058   2
  -2   1   5 29484.7 896.860   4
   2   1  -4 50690.8 1200.73  18
  -2   1   4 55321.0 1342.30   2
   2   1  -4 52224.5 1244.90  17
  -2   1   4 54699.2 1266.49   4
  -2   1   3 7541.48 354.510   2
  -2   1   3 7195.39 244.756   5
   2   1  -3 7073.58 308.760  17
  -2   1   3 7361.87 324.667   4
  -2   1   2 221743. 3946.70   2
  -2   1   2 220328. 3727.15   3
   2   1  -2 221363. 3882.57  17
   2   1  -1 120754. 2139.23  17
   2   1  -1 117960. 1988.28   5
  -2   1   1 116001. 2174.95   2
  -2   1   1 119000. 2202.86   6
  -2   1   1 116001. 2104.79   3
  -2   1   0 178158. 3211.11   3
   2   1   0 185299. 3168.19  17
   2   1   0 181719. 3126.58   5
  -2   1   0 182543. 3236.39   6
  -2   1   0 186089. 3097.00  20
  -2   1   0 173841. 3189.10   2
  -2   1  -1 113335. 2070.42   6
  -2   1  -1 112953. 2023.95   2
   2   1   1 110013. 2033.67   5
  -2   1  -1 111433. 1952.58  21
   2   1   1 109107. 2002.91   4
  -2   1  -1 110398. 2019.22  20
  -2   1  -2 19876.8 468.680  21
  -2   1  -2 19768.4 587.461   3
   2   1   2 18748.6 543.257   5
  -2   1  -2 19389.6 545.118  20
   2   1   2 18227.0 516.937   4
  -2   1  -3 88589.0 1851.34   3
   2   1   3 86434.9 1818.59   5
   2   1   3 87103.3 1793.75   4
  -2   1  -3 90601.4 1725.31  21
  -2   1  -4 15123.4 492.840  21
  -2   1  -4 15020.5 557.457   3
  -2   1  -4 15193.3 591.031  20
   2   1   4 14696.5 546.742   5
   2   1   4 14704.5 545.765   4
  -2   1  -5 22495.9 705.193  21
  -2   1  -5 24194.5 853.311  20
  -2   1  -5 22274.6 761.436   3
   2   1   5 23019.2 771.780   5
   2   1   5 23617.0 790.335   4
  -2   1  -6 4409.84 324.836   3
  -2   1  -6 5028.95 402.254  20
   2   1   6 4290.45 331.240   5
   2   1   6 4425.82 350.201   4
  -2   1  -7 9448.26 619.739  20
   2   1   7 8412.09 513.513   5
   2   1   7 8680.10 555.378   4
  -2   1  -8 3190.87 135.838   8
  -2   1  -8 3270.13 138.270  13
   2   1   9 6459.08 206.302  11
  -2   1  -9 6436.02 213.519   8
  -2   1  -9 6743.29 218.122  13
   2   1  10 4734.38 170.151  11
  -2   1 -10 4844.36 159.917  12
  -2   1 -10 4827.46 178.374   8
  -2   1 -10 5102.76 183.574  13
  -2   1 -11 2388.80 113.446  13
   2   1  11 2345.51 105.563  11
   2   1  12 1049.07 59.5666  11
  -2   1 -12 1029.33 63.8637  13
  -2   2  12 2026.89 85.5768  11
  -2   2  11 615.506 56.4496  11
  -2   2  11 518.778 42.2014   9
   2   2 -10 677.144 61.1280   8
  -2   2  10 714.451 66.5296  11
  -2   2  10 765.290 58.3305   9
   2   2 -10 755.389 62.1301  13
  -2   2   9 26636.9 578.973  11
   2   2  -9 27212.1 569.151   8
   2   2  -9 26614.9 557.603  13
   2   2  -8 15615.0 368.014   8
  -2   2   8 15643.7 378.116  11
  -2   2   7 9868.50 620.887   2
   2   2  -7 9209.14 559.794  20
   2   2  -7 9580.32 613.612  17
  -2   2   7 10211.6 606.772   4
   2   2  -6 22407.4 833.899  20
   2   2  -6 21095.4 851.002  17
  -2   2   6 23036.7 877.954   4
  -2   2   6 22226.6 898.113   2
   2   2  -6 23145.9 817.639  18
  -2   2   5 2792.70 256.600   4
  -2   2   5 2705.98 265.302   2
   2   2  -5 2652.18 220.359  18
   2   2  -5 2578.52 238.280  17
  -2   2   4 3076.12 254.391   2
  -2   2   4 2869.90 189.825   5
   2   2  -4 2951.07 227.093  17
  -2   2   4 2694.28 231.181   4
  -2   2   3 2008.48 146.151   5
   2   2  -3 2402.17 184.286  17
  -2   2   3 2282.74 190.565   4
  -2   2   3 2192.17 191.479   2
  -2   2   2 142944. 2528.95   3
  -2   2   2 141433. 2713.10   2
   2   2  -2 148801. 2676.92  17
  -2   2   1 194648. 3595.37   6
   2   2  -1 210791. 3423.75   5
   2   2  -1 207169. 3601.07  17
  -2   2   1 189565. 3535.10   3
  -2   2   0 185023. 3164.94  20
  -2   2   0 186125. 3344.94   6
   2   2   0 198082. 3259.67   5
  -2   2   0 180521. 3348.46   3
  -2   2   0 189933. 3373.66   2
   2   2   0 191371. 3177.01   4
   2   2   1 113345. 2024.63   4
  -2   2  -1 116202. 2041.21  20
   2   2   1 107967. 2071.20   5
  -2   2  -1 113032. 2114.58   2
  -2   2  -1 112892. 2097.97   6
  -2   2  -2 15404.9 322.713  21
  -2   2  -2 15937.7 472.868  20
   2   2   2 15162.8 307.292   2
   2   2   2 15522.1 480.043   5
  -2   2  -2 16570.7 540.378   3
   2   2   2 14876.5 451.620   4
  -2   2  -3 21025.8 483.457  21
  -2   2  -3 19616.3 623.362  20
  -2   2  -3 20341.6 652.848   3
   2   2   3 18428.1 593.621   5
   2   2   3 17976.8 574.291   4
  -2   2  -4 11298.2 501.956  20
  -2   2  -4 11550.2 493.508   3
   2   2   4 10548.5 459.507   5
   2   2   4 11124.4 467.877   4
   2   2   5 14318.5 601.664   5
  -2   2  -5 15909.9 632.139   3
  -2   2  -5 16871.9 704.002  20
   2   2   5 15787.0 638.429   4
  -2   2  -6 66454.9 1794.92  20
  -2   2  -6 68368.3 1661.48   3
   2   2   6 62517.8 1693.21   4
   2   2   6 64306.4 1657.58   5
  -2   2  -7 1357.23 233.619  20
   2   2   7 1874.07 239.129   5
   2   2   7 1997.45 266.130   4
   2   2   8 10923.2 283.680  11
  -2   2  -8 10873.0 290.657   8
  -2   2  -8 10690.5 290.817  13
   2   2   9 1491.63 90.4956  11
  -2   2  -9 1486.23 94.9642   8
  -2   2  -9 1472.90 95.6242  13
  -2   2 -10 1324.39 79.6179  12
   2   2  10 1377.61 85.8834  11
  -2   2 -10 1355.68 89.6911   8
  -2   2 -10 1273.03 88.2085  13
  -2   2 -11 408.756 41.3075  12
   2   2  11 454.031 45.9088  11
  -2   2 -11 485.825 53.1152   8
  -2   2 -11 502.778 53.7545  13
  -2   2 -12 2312.43 94.9641  13
   2   2  12 2274.46 86.6754  11
  -2   3  12 86.0965 22.5493  11
  -2   3  11 1693.27 91.4551  11
  -2   3  10 1378.20 89.4113  11
  -2   3  10 1323.12 74.8083   9
   2   3 -10 1319.24 81.9990   8
   2   3 -10 1371.44 81.1525  13
  -2   3   9 27057.8 586.220  11
  -2   3   9 26981.3 555.879   9
   2   3  -9 27602.1 573.015   8
   2   3  -9 26789.1 562.230  13
  -2   3   8 4302.76 165.991  11
  -2   3   8 4211.89 151.440   9
   2   3  -8 4397.57 157.943   8
   2   3  -7 7984.84 535.266  20
   2   3  -7 7668.52 546.988  17
  -2   3   7 7514.95 537.549   2
  -2   3   7 7526.71 541.041   4
  -2   3   6 18619.0 821.820   2
   2   3  -6 18837.9 789.772  20
   2   3  -6 19211.5 813.277  17
  -2   3   6 20319.9 848.757   4
  -2   3   5 48220.9 1360.39   4
  -2   3   5 47173.0 1346.79   2
   2   3  -5 47272.0 1297.62  17
  -2   3   4 29598.2 916.279   2
  -2   3   4 27899.0 805.929   5
   2   3  -4 29199.9 869.000  17
  -2   3   4 29431.4 917.318   4
  -2   3   3 64268.8 1371.26   5
   2   3  -3 61425.1 1407.51  17
  -2   3   3 60368.7 1435.27   2
  -2   3   2 256812. 4522.15   6
  -2   3   2 252484. 4505.63   5
   2   3  -2 268585. 4559.30  17
  -2   3   2 240314. 4560.33   2
  -2   3   1 76176.9 1544.83   6
   2   3  -1 79941.8 1448.90   5
  -2   3   1 77714.6 1558.64   3
   2   3  -1 79871.8 1607.60  17
  -2   3   1 80352.9 1641.17   2
  -2   3   0 127794. 2350.20   6
  -2   3   0 127168. 2192.02  20
   2   3   0 130094. 2320.10   5
   2   3   0 129140. 2198.63   4
  -2   3   0 128698. 2443.84   2
  -2   3   0 129848. 2418.54   3
  -2   3  -1 64140.0 1265.85  20
  -2   3  -1 65913.3 1310.94   6
   2   3   1 65693.4 1334.24   5
  -2   3  -1 67230.4 1414.37   3
  -2   3  -1 67197.7 1391.88   2
   2   3   1 64856.6 1265.45   4
  -2   3  -2 210524. 3843.84   3
   2   3   2 206139. 3755.68   5
   2   3   2 201841. 3711.48   4
  -2   3  -2 215824. 3737.57  20
  -2   3  -3 12856.1 520.227   3
   2   3   3 12685.2 482.625   5
  -2   3  -3 13337.8 492.154  20
   2   3   3 12283.7 465.251   4
  -2   3  -4 4410.70 309.020   3
  -2   3  -4 4759.83 315.871  20
   2   3   4 4404.91 296.293   5
   2   3   4 4262.18 288.594   4
  -2   3  -5 46263.2 1304.79   3
   2   3   5 48083.6 1295.30   5
  -2   3  -5 49245.9 1367.99  20
   2   3   5 49601.6 1329.37   4
  -2   3  -6 2552.53 265.554   3
  -2   3  -6 3188.23 326.443  20
   2   3   6 2569.20 270.153   5
   2   3   6 2552.92 279.145   4
  -2   3  -7 6779.02 525.726  20
   2   3   7 5840.04 438.945   5
   2   3   7 6362.42 481.866   4
  -2   3  -8 7294.94 226.578   8
   2   3   8 7262.61 218.443  11
   2   3   9 44.5033 27.2606  11
  -2   3  -9 66.3938 33.3871   8
  -2   3  -9 66.2906 32.8525  13
   2   3  10 1008.66 71.3478  11
  -2   3 -10 1006.48 78.4011   8
  -2   3 -10 1100.71 81.4939  13
   2   3  11 745.146 55.5068  11
  -2   3 -11 723.670 60.9886   8
  -2   3 -11 666.784 60.5468  13
  -2   3 -11 690.404 51.9722  12
   2   3  12 1918.33 73.4284  11
  -2   3 -12 1885.66 81.4673  13
  -2   4  12 412.554 35.3244  11
  -2   4  11 903.425 64.1358  11
  -2   4  10 866.975 70.8587  11
  -2   4  10 776.347 56.0725   9
   2   4 -10 715.092 60.0359   8
   2   4 -10 703.171 57.1786  13
  -2   4   9 5165.04 189.723  11
  -2   4   9 5311.72 171.274   9
   2   4  -9 5080.77 176.712   8
   2   4  -9 5180.03 175.123  13
  -2   4   8 7329.75 232.276  11
  -2   4   8 7556.31 218.719   9
  -2   4   8 7435.32 200.254  14
   2   4  -8 7571.04 222.981   8
  -2   4   7 3380.75 139.505  11
   2   4  -7 3384.30 354.878  20
  -2   4   7 3520.76 362.511   2
  -2   4   7 3440.07 131.108   9
  -2   4   7 3031.68 345.685   4
  -2   4   6 9280.93 566.279   2
   2   4  -6 9736.34 571.036  17
  -2   4   6 9928.01 602.262   4
   2   4  -5 44844.5 1283.91  17
  -2   4   5 44608.6 1348.53   4
  -2   4   5 43484.0 1303.04   2
  -2   4   5 46228.5 1239.31   5
  -2   4   4 4801.96 340.558   2
  -2   4   4 4610.20 310.157   5
   2   4  -4 5452.35 345.292  17
  -2   4   3 127519. 2572.87   5
   2   4  -3 134189. 2604.17  17
  -2   4   3 124987. 2608.06   2
  -2   4   2 19641.7 573.048   6
  -2   4   2 19832.3 658.756   2
   2   4  -2 20292.8 643.788  17
  -2   4   1 35644.6 821.166   6
   2   4  -1 36443.4 803.977   5
   2   4  -1 36430.2 931.111  17
  -2   4   1 34946.0 939.718   2
  -2   4   0 6276.35 242.130   6
   2   4   0 5809.92 302.896  17
   2   4   0 6036.21 258.247   5
  -2   4   0 5588.49 295.960   3
  -2   4   0 6209.10 317.015   2
  -2   4  -1 422267. 7165.91  20
  -2   4  -1 416335. 7368.01   3
   2   4   1 404572. 7264.42   5
  -2   4  -1 433576. 7367.05   2
   2   4   1 434354. 7166.29   4
  -2   4  -2 10358.6 454.007   3
   2   4   2 9750.89 372.940   4
   2   4   2 9809.21 406.268   5
  -2   4  -2 9439.33 376.722  20
  -2   4  -3 57034.6 1402.27   3
   2   4   3 55361.7 1329.49   5
   2   4   3 53727.6 1286.00   4
  -2   4  -3 55482.4 1308.04  20
  -2   4  -4 43062.9 1180.13  20
  -2   4  -4 41552.4 1205.52   3
   2   4   4 44308.0 1175.65   5
   2   4   4 42252.7 1151.51   4
  -2   4  -5 8328.67 495.113  20
  -2   4  -5 9984.81 536.478   3
   2   4   5 9406.75 501.516   5
   2   4   5 9750.75 517.762   4
   2   4   6 709.224 159.565   4
  -2   4  -6 539.735 147.476  20
   2   4   6 677.496 147.941   5
  -2   4  -7 2526.84 117.304   8
   2   4   8 2611.98 119.128  11
  -2   4  -8 2471.41 122.338   8
   2   4   9 3347.82 136.993  11
  -2   4  -9 3343.53 145.910   8
  -2   4  -9 3288.07 145.255  13
   2   4  10 588.932 54.1769  11
  -2   4 -10 619.831 62.9564   8
  -2   4 -10 701.283 65.7184  13
  -2   4 -11 968.247 61.3996  12
  -2   4 -11 849.522 61.9364   8
  -2   4 -11 964.084 65.7534  13
   2   4  11 877.084 56.3975  11
  -2   4 -12 188.445 26.4090  13
  -2   5  12 722.156 42.8313  11
  -2   5  11 990.404 64.2601  11
  -2   5  10 2191.24 109.617  11
  -2   5  10 2236.95 93.8651   9
   2   5 -10 2195.48 99.0383  13
   2   5 -10 2119.25 98.0054   8
  -2   5   9 3277.73 127.587   9
  -2   5   9 3163.41 142.276  11
   2   5  -9 3283.82 134.059   8
  -2   5   8 2325.43 120.359  11
  -2   5   8 2534.90 112.456   9
   2   5  -8 2358.29 112.966   8
  -2   5   7 10423.5 287.205  11
  -2   5   7 10952.9 275.575   9
  -2   5   7 10319.9 253.826  14
   2   5  -6 5766.60 440.705  17
  -2   5   6 5652.19 443.622   2
  -2   5   5 25368.4 916.720   5
   2   5  -5 25896.3 930.516  17
  -2   5   5 25089.2 943.956   2
  -2   5   4 50188.6 1345.87   5
   2   5  -4 48543.8 1330.97  17
  -2   5   4 48504.1 1350.15   2
   2   5  -3 198.319 69.8506  17
  -2   5   3 323.825 86.7376   2
  -2   5   3 385.606 98.1427   5
   2   5  -2 7893.50 399.370  17
  -2   5   2 8311.66 421.855   2
   2   5  -1 18726.8 662.057  17
  -2   5   1 18413.2 668.595   2
   2   5   0 41128.9 979.966   5
   2   5   0 39786.7 1062.50  17
  -2   5   0 41172.4 1081.51   2
  -2   5  -1 77833.3 1702.84   3
   2   5   1 73308.6 1484.63   4
   2   5   1 72938.0 1583.54   5
  -2   5  -2 26843.8 745.541  20
   2   5   2 26260.8 798.620   5
  -2   5  -2 28250.7 874.239   3
   2   5   2 27079.7 738.938   4
  -2   5  -3 100661. 2190.05  20
   2   5   3 109538. 2272.50   5
  -2   5  -3 106346. 2329.95   3
   2   5   3 106612. 2192.82   4
  -2   5  -4 75773.3 1786.12  20
  -2   5  -4 75264.2 1861.50   3
   2   5   4 73974.9 1787.10   5
   2   5   4 72185.3 1745.42   4
  -2   5  -5 17275.7 747.477  20
   2   5   5 16784.6 729.413   5
  -2   5  -5 17086.7 773.998   3
   2   5   5 16278.4 714.061   4
  -2   5  -6 11280.0 650.049  20
  -2   5  -6 12197.1 662.116   3
   2   5   6 10715.8 612.660   5
   2   5   6 10773.9 616.843   4
  -2   5  -7 2188.11 102.273  16
  -2   5  -7 2311.30 115.614   8
   2   5   8 5687.50 186.232  11
  -2   5  -8 5698.90 198.451   8
   2   5   9 3464.26 137.686  11
  -2   5  -9 3805.01 153.717   8
   2   5  10 929.332 62.4001  11
  -2   5 -10 945.363 71.5358   8
  -2   5 -10 1010.31 73.7646  13
   2   5  11 472.938 37.9977  11
  -2   5 -11 517.362 47.2278   8
  -2   5 -11 536.561 48.5459  13
  -2   5 -11 494.181 43.3799  12
  -2   6  11 21.4998 17.3376  11
  -2   6  10 254.499 40.6461  11
  -2   6  10 260.772 31.1005   9
   2   6 -10 254.411 35.3132  13
  -2   6   9 5381.90 188.388  11
  -2   6   9 5618.62 171.319   9
   2   6  -9 5259.53 173.335   8
  -2   6   8 5723.04 201.469  11
  -2   6   8 6067.06 188.828   9
   2   6  -8 5811.92 188.603   8
  -2   6   7 2919.07 136.017  11
  -2   6   7 3115.44 126.984   9
   2   6  -7 3161.18 128.343   8
  -2   6   6 4631.98 171.970  11
  -2   6   6 4442.86 394.362   2
  -2   6   6 5252.01 166.993   9
  -2   6   5 20144.9 844.966   5
   2   6  -5 19361.1 817.294  17
  -2   6   5 18823.2 822.880   2
   2   6  -4 607.052 135.967  17
  -2   6   4 562.121 137.460   2
  -2   6   4 400.991 119.945   5
   2   6  -3 15742.9 654.394  17
  -2   6   3 15961.9 676.831   2
   2   6  -2 4349.76 316.006  17
  -2   6   2 4673.51 331.162   2
   2   6  -1 45739.1 1230.06  17
  -2   6   1 46207.3 1239.14   2
   2   6   0 31660.0 958.105  17
   2   6   0 30995.5 879.346   5
  -2   6   0 32103.7 962.355   2
   2   6   1 1181.73 149.471   5
  -2   6  -1 1601.66 192.020   3
   2   6   2 26203.3 844.593   5
  -2   6  -2 27566.1 922.994   3
  -2   6  -3 23931.7 887.238   3
  -2   6  -3 22882.2 773.542  20
   2   6   3 23129.2 765.095   4
   2   6   3 21987.1 805.871   5
  -2   6  -4 17982.2 734.029  20
   2   6   4 17858.5 751.640   5
  -2   6  -4 20094.4 837.824   3
   2   6   4 17603.4 710.619   4
  -2   6  -5 4527.14 384.454  20
  -2   6  -5 4473.03 403.108   3
   2   6   5 4170.54 361.652   5
   2   6   5 4343.95 361.969   4
  -2   6  -6 21008.1 949.344  20
  -2   6  -6 21344.6 959.730   3
  -2   6  -6 22511.6 474.011  16
  -2   6  -7 3377.96 133.680  16
  -2   6  -7 3255.58 143.059   8
  -2   6  -8 4716.34 161.647  16
  -2   6  -8 4938.76 181.145   8
  -2   6  -9 861.007 71.3017   8
  -2   6 -10 277.076 39.2356   8
  -2   6 -10 248.362 39.7164  13
  -2   6 -11 161.334 26.3358  12
  -2   6 -11 170.411 27.7471   8
  -2   6 -11 141.759 26.8025  13
  -2   7  11 1368.18 63.0887  11
  -2   7  10 52.5818 25.1906  11
  -2   7  10 66.6753 18.3636   9
   2   7 -10 77.1740 22.5107  13
  -2   7   9-8.74473 27.2546  11
  -2   7   9 8.90192 19.9540   9
   2   7  -9 33.5400 24.8074   8
  -2   7   8 1520.68 95.5693  11
  -2   7   8 1602.41 87.2261   9
   2   7  -8 1440.62 84.1230   8
  -2   7   7 3948.89 146.781   9
  -2   7   7 3737.16 156.092  11
   2   7  -7 3796.60 144.679   8
  -2   7   6 272.822 45.5251  11
  -2   7   6 430.740 47.4041   9
  -2   7   5 541.940 55.3649  11
  -2   7   5 541.065 127.781   5
  -2   7   5 539.376 50.0198   9
   2   7  -5 457.671 126.893  17
  -2   7   5 774.787 155.498   2
   2   7  -4 40072.8 1277.37  17
  -2   7   4 42501.9 1313.32   2
   2   7  -3 42826.3 1291.93  17
  -2   7   3 45798.0 1330.37   2
   2   7  -2 16148.7 688.256  17
  -2   7   2 16649.4 704.341   2
   2   7  -1 25850.6 909.982  17
  -2   7   1 27410.7 921.995   2
   2   7   0 37441.5 1061.09   5
   2   7   0 37371.1 1137.45  17
   2   7   1 36311.8 1090.26   5
   2   7   1 37666.5 1158.14  17
  -2   7  -2 1065.60 192.204   3
   2   7   2 812.096 144.088   5
   2   7   3 2487.73 267.299   5
  -2   7  -3 2575.13 294.425   3
   2   7   4 5659.61 424.879   5
  -2   7  -4 6119.72 477.896   3
  -2   7  -5 1816.00 94.2816  16
  -2   7  -5 1932.80 280.093   3
  -2   7  -5 1819.68 93.1030   7
  -2   7  -6 38300.8 756.383   7
  -2   7  -6 39090.6 759.070  16
  -2   7  -7 1061.98 74.8068  16
  -2   7  -7 1130.98 83.2739   8
  -2   7  -8 1395.46 82.9701  16
  -2   7  -8 1437.94 91.5962   8
  -2   7  -9 1368.69 84.9742   8
  -2   7 -10 1382.78 75.6361   8
  -2   7 -10 1418.00 76.9117  13
  -2   7 -10 1273.18 71.0102  12
  -2   7 -11 98.2391 19.6577  12
  -2   7 -11 136.184 22.6300   8
  -2   7 -11 125.770 22.6923  13
  -2   8  10 631.996 48.4301  11
   2   8 -10 615.058 41.0252  13
  -2   8   9 506.706 52.2652  11
  -2   8   9 486.054 43.0454   9
  -2   8   8 426.620 46.5404   9
  -2   8   8 477.792 53.9173  11
   2   8  -8 419.731 43.7372   8
  -2   8   7 8345.48 251.359  11
  -2   8   7 8843.41 240.705   9
   2   8  -7 8229.75 232.531   8
  -2   8   6 1579.08 97.7479  11
  -2   8   6 1759.07 94.1432   9
   2   8  -6 1684.63 90.8671   8
  -2   8   5 647.599 61.2760  11
  -2   8   5 638.489 56.5907   9
  -2   8   4 7356.92 206.967   9
  -2   8   4 6358.35 464.462   2
   2   8  -4 6661.50 192.629   7
  -2   8   4 6735.81 211.717  11
   2   8  -3 8060.42 513.992  17
  -2   8   3 8354.02 517.359   2
   2   8  -2 8342.66 512.621  17
  -2   8   2 8744.45 518.048   2
   2   8  -1 940.801 173.172  17
  -2   8   1 1013.71 172.894   2
   2   8   0 2940.71 300.760  17
   2   8   1 1262.05 198.542  17
  -2   8  -1 1386.66 213.311   3
   2   8   1 1060.59 176.306   5
   2   8   2 91.5251 55.7728  17
  -2   8  -2-16.5884 62.3156   3
   2   8   2-3.16244 62.9698   5
  -2   8  -3 5772.53 470.088   3
   2   8   3 5008.28 407.961   5
  -2   8  -4 11885.4 298.797  16
  -2   8  -4 11389.4 291.495   7
  -2   8  -5 1358.45 86.1749  16
  -2   8  -5 1572.44 90.1751   7
  -2   8  -6 3912.91 150.122  16
  -2   8  -6 3929.55 151.044   7
  -2   8  -7 5408.81 181.047  16
  -2   8  -7 5493.78 189.832   8
  -2   8  -8 3731.68 138.119  16
  -2   8  -8 4094.12 153.488   8
  -2   8  -9 940.700 65.8768   8
  -2   8 -10 666.149 48.7842   8
  -2   8 -10 725.949 49.6132  13
  -2   8 -10 586.502 43.6735  12
  -2   9  10 164.393 23.3265  11
  -2   9   9 1587.48 80.2134  11
  -2   9   9 1759.33 72.6044   9
  -2   9   8 271.175 42.1058  11
  -2   9   8 332.003 39.0167   9
  -2   9   7 594.346 55.8433   9
   2   9  -7 556.775 49.7550  16
  -2   9   7 596.648 60.9504  11
   2   9  -7 483.683 49.0070   8
  -2   9   6 1562.52 89.2298   9
  -2   9   6 1486.82 93.4856  11
   2   9  -6 1390.42 82.1998   8
  -2   9   5 3277.69 144.594  11
  -2   9   5 3411.31 137.067   9
  -2   9   4 1528.50 93.1688  11
  -2   9   4 1635.01 90.7028   9
   2   9  -4 1345.91 77.0591   7
  -2   9   3 2750.04 119.748   9
  -2   9   3 2735.98 125.602  11
  -2   9   2 974.584 69.2765   9
  -2   9   2 876.989 69.2260  11
  -2   9   1 214.552 37.1628  11
   2   9  -1 323.519 103.098  17
  -2   9   0 71.7167 24.6551   7
   2   9   0-48.4819 49.8992  17
  -2   9   0 29.9813 67.9749   3
   2   9   1 1693.26 233.705   5
   2   9   1 1535.37 231.751  17
  -2   9  -1 1922.76 95.5414   7
  -2   9  -1 1786.58 263.230   3
  -2   9  -2 751.243 62.9819  16
  -2   9  -2 807.253 62.4818   7
  -2   9  -3 1075.87 71.8572   7
  -2   9  -3 613.155 59.7680  16
  -2   9  -4 12783.6 321.552  16
  -2   9  -4 12388.9 316.144   7
  -2   9  -5 6952.48 215.502  16
  -2   9  -5 6873.42 214.115   7
  -2   9  -6 1095.17 77.5284  16
  -2   9  -7 1446.70 85.3900  16
  -2   9  -7 1630.23 94.2895   8
  -2   9  -8 3211.17 119.897  16
  -2   9  -8 3236.41 129.156   8
  -2   9  -9 829.954 47.9286  16
  -2   9  -9 797.968 52.5258  12
  -2   9 -10 268.123 27.7562   8
  -2   9 -10 257.651 27.7833  13
  -2   9 -10 210.893 22.8434  12
  -2  10   9 279.036 30.6881  11
   2  10  -9 243.397 25.2707  13
  -2  10   8 1566.08 79.7936  11
  -2  10   7 354.441 44.1712  11
  -2  10   7 443.207 44.7715   9
   2  10  -7 356.211 38.4608  16
  -2  10   6 1365.05 82.0370   9
  -2  10   6 1378.66 86.8500  11
   2  10  -6 1152.59 71.2398   8
  -2  10   5 1220.69 80.8016   9
  -2  10   5 1178.98 83.2747  11
  -2  10   4 275.386 43.8406  11
  -2  10   4 290.286 45.0424   9
  -2  10   3 18453.4 439.435  11
  -2  10   3 20077.6 438.463   9
  -2  10   2 1781.39 100.434  11
  -2  10   1 7212.03 221.262  11
  -2  10   1 6776.43 209.304   7
  -2  10   0 2472.92 115.030   7
  -2  10  -1 137.490 31.4088  16
  -2  10  -1 239.272 38.4237   7
  -2  10  -2 903.979 69.5269  16
  -2  10  -2 923.302 69.7436   7
  -2  10  -3 2832.25 125.504  16
  -2  10  -3 2584.69 120.577   7
  -2  10  -4 677.936 62.1218  16
  -2  10  -4 675.378 63.0412   7
  -2  10  -5 3045.42 131.365  16
  -2  10  -5 3033.39 131.612   7
  -2  10  -6 839.656 65.5536  16
  -2  10  -7 466.108 46.6346  16
  -2  10  -7 446.335 49.2405   8
  -2  10  -8 909.820 53.4161  12
  -2  10  -8 891.574 55.0749  16
  -2  10  -8 1039.22 64.6903   8
  -2  10  -9 1445.68 65.8156   8
  -2  10  -9 1475.84 65.6621  13
  -2  10  -9 1311.62 55.9479  12
  -2  11   8 1034.37 55.5569  11
  -2  11   7 93.9352 25.1779  11
   2  11  -7 117.749 23.0360  16
  -2  11   6 185.858 36.3156  11
   2  11  -6 160.874 33.4458  16
  -2  11   5 2151.78 106.647  11
  -2  11   4 1360.25 87.1468  11
  -2  11   3 4845.74 167.221   7
  -2  11   3 4814.93 173.538  11
  -2  11   2 1565.57 94.5772  11
  -2  11   2 1581.57 91.9280   7
  -2  11   1 1734.86 95.2958   7
  -2  11   0 4721.30 167.580   7
  -2  11  -1 4492.40 162.642   7
  -2  11  -1 4346.46 153.851  16
  -2  11  -2 1953.69 100.631  16
  -2  11  -2 2047.50 104.643   7
  -2  11  -3 4865.35 170.075  16
  -2  11  -3 5054.22 175.866   7
  -2  11  -4 5326.29 178.644  16
  -2  11  -4 5390.06 180.069   7
  -2  11  -5 3365.11 133.751  16
  -2  11  -5 3406.07 135.080   7
  -2  11  -6 894.955 63.7396  16
  -2  11  -6 976.619 68.0528   8
  -2  11  -7 176.750 29.4355  16
  -2  11  -7 106.672 27.2398   8
  -2  11  -8 1081.48 52.5755  16
  -2  11  -8 1142.85 59.4184   8
  -2  12   7 494.963 37.3984  11
  -2  12   7 480.428 34.4734   7
  -2  12   6 193.069 28.3270   7
  -2  12   6 248.220 33.4143  11
   2  12  -6 246.870 31.1554  16
   2  12  -5 653.729 53.5478  16
  -2  12   5 519.623 48.6443  11
  -2  12   5 507.251 45.7975   7
  -2  12   4 1469.88 82.6033  11
  -2  12   4 1495.15 80.6775   7
  -2  12   3 112.178 28.8035   7
  -2  12   2 1442.61 83.9831   7
  -2  12   1 8279.34 233.486   7
  -2  12   0 13075.3 320.557   7
  -2  12  -1 335.698 39.2582  16
  -2  12  -1 379.624 48.0444   7
  -2  12  -2 172.048 31.8237  16
  -2  12  -2 202.257 37.2761   7
  -2  12  -3 2855.80 120.136   7
  -2  12  -3 2553.81 112.266  16
  -2  12  -4 2845.07 116.234  16
  -2  12  -4 2941.27 119.895   7
  -2  12  -5 60.2725 25.3580  16
  -2  12  -6 815.327 54.0034  16
  -2  12  -6 866.886 57.2514   8
  -2  12  -7 1175.57 56.5166  16
  -2  12  -7 1248.57 60.5234   8
   2  13  -6 596.658 36.0975  16
  -2  13   5 273.164 30.1561   7
   2  13  -5 258.634 30.0756  16
   2  13  -4 3907.04 127.304  16
  -2  13   4 4046.20 126.303   7
  -2  13   3 68.8792 24.3215   7
  -2  13   2 3060.72 115.636   7
  -2  13   1 479.881 47.2971   7
  -2  13   0 2314.84 102.132   7
  -2  13  -1 2179.71 97.8257   7
  -2  13  -2 584.648 51.2540   7
  -2  13  -2 486.579 43.0331  16
  -2  13  -3 770.583 53.6680  16
  -2  13  -3 881.538 59.7022   7
  -2  13  -4 1846.83 81.8174  16
  -2  13  -4 1936.05 84.8591   7
  -2  13  -5 290.123 31.4638  16
  -2  13  -5 238.323 30.0568   8
  -2  13  -6 6.71262 13.3271  16
  -2  13  -6 12.7301 13.3384   8
  -2  14   4 129.740 19.7037   7
   2  14  -4 136.434 20.3460  16
   2  14  -3 1258.74 59.1137  16
  -2  14   3 1302.31 58.3818   7
  -2  14   2 2955.06 98.1371   7
   2  14  -2 2742.08 94.8614  16
   2  14  -1 1253.60 61.2679  16
  -2  14   1 1281.55 64.0959   7
  -2  14   0 6154.71 165.051   7
  -2  14  -1 913.079 55.1804   7
  -2  14  -2 752.751 48.5384   7
  -2  14  -3 583.132 37.6646  16
  -2  14  -3 607.584 41.6934   7
  -2  14  -4 51.9413 14.9666  16
  -2  14  -4 57.0973 16.7763   8
  -3 -14   3 189.547 23.4316  15
  -3 -14   2 610.076 39.2555  15
  -3 -14   1 3649.26 104.051  15
   3 -14   0 862.438 57.1519  22
   3 -14   1 454.867 41.7320  22
   3 -14   2 1.85259 16.6523  22
   3 -14   3 214.828 25.7041  22
  -3 -13   5 563.350 39.8862  15
  -3 -13   5 533.944 38.2299  22
  -3 -13   4 29.9164 17.3294  22
  -3 -13   4 105.746 26.2958  15
  -3 -13   3 1747.15 81.4147  15
  -3 -13   2 1058.21 64.1803  15
  -3 -13   1 1513.64 76.0565  15
   3 -13   1 4849.87 167.154  22
   3 -13   2 1024.94 71.2965  22
   3 -13   3 781.619 58.6681  22
  -3 -13  -3 786.194 61.8370  23
   3 -13   4 630.076 47.6460  22
  -3 -13  -4 627.131 51.6054  23
  -3 -13  -5 555.253 44.2851  23
  -3 -12   6 1016.81 60.2472  22
  -3 -12   6 998.251 55.8826  15
   3 -12  -6 930.293 54.7525  23
  -3 -12   5 206.134 33.4583  22
  -3 -12   5 206.613 34.3290  15
  -3 -12   4 2796.73 118.050  22
  -3 -12   4 3131.95 120.988  15
  -3 -12   3 4530.50 158.194  22
  -3 -12   3 4831.45 162.123  15
  -3 -12   2 277.848 42.6903  15
  -3 -12   1 1257.52 78.1754  15
  -3 -12   0 3906.36 139.233  15
  -3 -12  -1 1155.05 89.9605  23
   3 -12   2 555.307 59.3030  22
  -3 -12  -2 568.145 63.6821  23
   3 -12   3 112.668 33.8196  22
  -3 -12  -3 87.7087 38.5966  23
   3 -12   4 2489.78 110.949  22
  -3 -12  -4 2280.47 113.522  23
   3 -12   5 267.665 34.7741  22
  -3 -12  -5 243.073 38.3184  23
  -3 -12  -6 586.819 48.2783  23
  -3 -11   8 210.526 27.8761  22
   3 -11  -8 193.718 26.0894  23
   3 -11  -7 3607.53 123.770  23
  -3 -11   7 3344.82 107.980  15
  -3 -11   7 3444.40 124.179  22
  -3 -11   6 143.689 32.9000  22
  -3 -11   6 196.013 33.4444  15
   3 -11  -6 172.656 32.2105  23
  -3 -11   5 620.440 60.5345  22
  -3 -11   5 809.296 63.3078  15
   3 -11  -5 669.403 59.3770  23
  -3 -11   4 774.323 67.5971  22
  -3 -11   4 865.252 69.7275  15
  -3 -11   3 538.973 56.8599  22
  -3 -11   3 711.868 63.9118  15
  -3 -11   2 5472.05 187.458  15
  -3 -11   1 3434.27 141.196  15
  -3 -11   0 9171.56 286.638  23
  -3 -11   0 8941.25 247.893  15
  -3 -11  -1 3569.29 165.012  23
  -3 -11  -2 1871.62 117.233  23
   3 -11   3 1735.81 103.604  22
  -3 -11  -3 1643.19 107.026  23
   3 -11   4 3048.50 133.830  22
  -3 -11  -4 2836.01 138.518  23
   3 -11   5 171.736 34.0391  22
  -3 -11  -5 186.699 40.2900  23
   3 -11   6 48.6191 19.7345  22
  -3 -11  -6 19.7098 24.1291  23
  -3 -11  -7 264.021 34.5686  23
   3 -10  -9 1020.15 54.3571  23
  -3 -10   9 1071.35 55.3537  22
  -3 -10   8 3394.36 124.044  22
   3 -10  -8 3335.08 122.889  23
  -3 -10   7 1149.73 66.1119  15
   3 -10  -7 1163.86 76.1059  23
  -3 -10   7 1338.52 82.3162  22
  -3 -10   6 295.426 46.5120  22
   3 -10  -6 286.392 44.3347  23
  -3 -10   6 253.154 39.5334  15
  -3 -10   5 3190.16 144.170  22
  -3 -10   5 3375.81 139.739  15
   3 -10  -5 3172.49 140.303  23
  -3 -10   4 7083.26 229.841  22
  -3 -10   4 7363.56 228.673  15
   3 -10  -4 7244.32 228.332  23
  -3 -10   3 3458.88 147.880  22
  -3 -10   3 3281.56 143.372  15
  -3 -10   2 3211.64 139.346  15
  -3 -10   1 3088.18 133.997  15
  -3 -10   0 5584.01 185.076  15
  -3 -10   0 5805.45 215.465  23
  -3 -10  -1 10803.0 319.955  23
  -3 -10  -2 5020.63 201.183  23
  -3 -10  -3 2447.45 134.661  23
   3 -10   4 7245.52 230.911  22
  -3 -10  -4 7055.86 240.929  23
  -3 -10  -5 73.2071 30.1488  23
   3 -10   5 113.795 32.3874  22
  -3 -10  -6 146.776 35.7411  23
  -3 -10  -7 14.2163 23.2157  23
  -3  -9   9 105.938 27.0053  22
   3  -9  -9 109.865 26.6164  23
  -3  -9   8 2388.10 111.985  22
   3  -9  -8 2394.23 111.354  23
  -3  -9   7 590.354 50.9292  15
   3  -9  -7 633.436 62.7182  23
  -3  -9   7 658.975 64.6142  22
  -3  -9   6 3687.91 158.872  22
   3  -9  -6 3550.46 152.171  23
  -3  -9   6 3576.20 141.657  15
  -3  -9   5 5861.30 209.562  22
   3  -9  -5 6313.22 210.899  23
  -3  -9   5 6140.40 201.942  15
  -3  -9   4 819.185 72.8386  22
  -3  -9   4 720.504 66.0945  15
   3  -9  -4 872.485 73.5016  23
  -3  -9   3 278.373 43.9172  22
  -3  -9   3 304.682 46.7775  15
  -3  -9   1 3111.68 145.831  23
  -3  -9   1 2827.92 125.804  15
  -3  -9   0 9794.88 293.814  23
  -3  -9   0 9882.09 262.324  15
  -3  -9  -1 2613.44 135.769  23
  -3  -9  -2 1459.53 100.668  23
  -3  -9  -3 8665.62 274.134  23
   3  -9   4 456.201 53.7809  22
  -3  -9  -4 412.075 57.2333  23
   3  -9   5 4765.05 176.287  22
  -3  -9  -5 4789.74 189.245  23
  -3  -9  -6 80.5734 31.7295  23
  -3  -9  -7 4266.87 160.390  23
  -3  -8  10 393.107 37.9404  22
   3  -8 -10 307.828 35.0271  23
  -3  -8   9 248.777 37.8948  22
   3  -8  -9 191.302 35.0018  23
   3  -8  -8 560.193 60.1817  23
  -3  -8   8 599.716 62.3641  22
  -3  -8   7 1866.10 92.1626  15
  -3  -8   7 1819.94 109.067  22
   3  -8  -7 1863.42 107.448  23
  -3  -8   6 484.250 60.7120  22
  -3  -8   6 485.018 51.4425  15
   3  -8  -6 560.849 61.4250  23
  -3  -8   5 3231.45 147.635  22
  -3  -8   5 3469.19 142.748  15
   3  -8  -5 3423.10 146.549  23
  -3  -8   4 5235.31 189.283  22
  -3  -8   4 5283.85 183.846  15
   3  -8  -4 5403.72 187.221  23
  -3  -8   3 15671.8 378.600  22
   3  -8  -2 1649.76 219.040  19
   3  -8  -2 1504.15 230.394  18
  -3  -8   1 3518.30 361.451  21
   3  -8  -1 2739.07 285.585  19
   3  -8   0 376.570 117.541  19
  -3  -8   0 494.281 152.790  21
   3  -8   0 323.355 115.389   1
  -3  -8  -1 4232.88 421.066  21
   3  -8   1 4103.15 360.644  19
   3  -8   1 5020.28 455.906   1
   3  -8   2 6113.10 447.827  19
   3  -8   2 5715.78 493.792   1
  -3  -8  -2 5326.43 487.628  21
  -3  -8  -3 463.438 56.3575  23
   3  -8   4 22650.7 495.652  22
  -3  -8  -4 21808.3 509.965  23
  -3  -8  -5 866.603 76.1861  23
  -3  -8  -6 4747.92 183.520  23
  -3  -8  -7 2449.58 121.428  23
  -3  -7  11 171.238 23.9489  22
   3  -7 -11 172.745 23.8225  23
   3  -7 -10 141.251 29.1676  23
  -3  -7  10 155.198 32.1239  22
  -3  -7   9 25.2570 27.8906  22
   3  -7  -9 40.8324 29.4611  23
   3  -7  -8 1127.82 83.1307  23
  -3  -7   8 1102.86 84.9273  22
   3  -7  -7 3147.34 143.192  23
  -3  -7   7 3263.85 151.640  22
  -3  -7   6 2641.21 131.645  22
  -3  -7   6 2535.97 114.850  15
   3  -7  -6 2533.28 124.309  23
  -3  -7   5 13876.7 356.586  22
  -3  -7   5 14017.0 340.398  15
   3  -7  -5 13690.3 344.537  23
   3  -7  -4 16860.5 799.047  18
   3  -7  -4 17187.2 728.783  19
   3  -7  -3 18948.2 807.764  18
   3  -7  -3 18830.0 754.895  19
   3  -7  -2 8476.57 471.300  19
   3  -7  -2 7643.53 471.655  18
   3  -7  -1 2098.17 231.881  19
   3  -7  -1 2096.78 229.752  18
  -3  -7   1 2118.07 273.820  21
   3  -7   0 18011.8 707.489  19
   3  -7   0 17218.7 812.068   1
  -3  -7   0 17374.7 815.054  21
  -3  -7  -1 6725.29 504.882  21
   3  -7   1 7173.71 427.196  19
   3  -7   1 6416.94 483.986   1
   3  -7   2 83545.8 2191.22   1
   3  -7   2 81437.5 1964.39  19
  -3  -7  -2 84925.0 2254.22  21
  -3  -7  -3 43340.9 1515.58  21
   3  -7   3 41479.6 1419.62   1
   3  -7   4 1669.50 264.778   1
  -3  -7  -4 2066.35 309.682  21
  -3  -7  -5 55.1194 26.1081  23
   3  -6 -11 289.317 33.4468  23
  -3  -6  11 369.196 36.3129  22
  -3  -6  10 439.603 48.6360  22
   3  -6 -10 513.001 52.0400  23
   3  -6  -9 646.048 62.4713  23
  -3  -6   9 634.353 64.3165  22
  -3  -6   8 2964.53 122.486  14
  -3  -6   8 3342.62 150.171  22
   3  -6  -8 2970.29 137.708  23
  -3  -6   7 2708.88 134.925  22
   3  -6  -7 2570.56 126.242  23
  -3  -6   6 2882.65 137.966  22
   3  -6  -6 2992.47 132.130  23
  -3  -6   6 3096.06 124.376  15
   3  -6  -5 5506.17 375.538  19
   3  -6  -5 4926.03 412.849  18
   3  -6  -4 20334.4 839.669  18
   3  -6  -4 20416.3 772.386  19
   3  -6  -3 34059.8 1039.16  19
   3  -6  -3 32188.2 1054.18  18
   3  -6  -2 13269.1 589.473  18
   3  -6  -2 15021.7 618.990  19
   3  -6  -1 25695.0 831.661  19
   3  -6  -1 23854.2 793.735  18
  -3  -6   1 26474.0 973.618  21
  -3  -6   0 10645.7 593.233  21
   3  -6   0 12643.7 530.009  19
   3  -6   1 70538.6 1812.71   1
  -3  -6  -1 70950.4 1856.55  21
   3  -6   1 66379.3 1590.30  19
   3  -6   2 40307.8 1110.84  19
   3  -6   2 41596.4 1305.71   1
  -3  -6  -2 42229.6 1366.58  21
   3  -6   3 28154.6 1060.65   1
  -3  -6  -3 30202.4 1155.67  21
   3  -6   3 29566.3 913.901  19
  -3  -6  -4 10944.9 684.436  21
   3  -6   4 9677.91 614.864   1
  -3  -6  -5 10400.3 701.751  21
   3  -6   5 11674.6 705.589   1
   3  -6   5 11265.3 659.000   4
  -3  -5  11 728.436 53.6749  22
   3  -5 -11 741.095 54.3780  23
  -3  -5  10 715.160 64.0515  22
   3  -5 -10 633.454 58.9751  23
  -3  -5   9 1277.68 92.2267  22
   3  -5  -9 1161.87 84.6262  23
   3  -5  -8 12574.2 327.419  23
  -3  -5   8 12100.1 303.925  14
  -3  -5   8 12769.5 344.655  22
   3  -5  -7 7219.68 224.340  23
  -3  -5   7 6934.63 232.346  22
  -3  -5   6 7616.25 234.671  22
   3  -5  -6 7383.14 220.820  23
   3  -5  -5 6259.93 402.325  19
   3  -5  -5 5665.60 440.090  18
  -3  -5   5 5410.85 449.080   1
   3  -5  -4 21530.7 825.375  19
   3  -5  -4 22001.2 866.775  18
  -3  -5   4 21927.5 873.976   1
   3  -5  -3 8470.69 488.620  19
   3  -5  -3 9053.58 493.733  18
   3  -5  -2 6378.20 408.533  19
   3  -5  -2 6640.37 385.183  18
   3  -5  -1 39577.7 1034.33  18
   3  -5  -1 38575.8 1114.56  19
  -3  -5   1 40676.2 1209.89  21
   3  -5   0 5714.85 340.486  19
  -3  -5   0 5301.44 383.160  21
   3  -5   1 58162.9 1329.90  19
   3  -5   1 52852.0 1442.73   1
  -3  -5  -1 55489.4 1518.33  21
  -3  -5  -2 55763.3 1552.91  21
   3  -5   2 53551.1 1265.30  19
   3  -5   2 55393.8 1478.11   1
   3  -5   3 7037.03 448.281   1
  -3  -5  -3 7625.37 502.436  21
   3  -5   3 6978.31 348.819  19
  -3  -5  -4 11188.3 656.768  21
   3  -5   4 12281.4 645.195   1
   3  -5   5 12841.8 707.753   1
  -3  -5  -5 13158.0 760.327  21
   3  -5   5 13964.2 710.691   4
   3  -5   6 19349.3 933.160   1
  -3  -5  -6 20658.2 464.421  13
  -3  -5  -7 30801.7 650.479  13
  -3  -5  -8 6989.08 231.384  13
  -3  -5  -9 1223.08 86.7832  13
  -3  -4  11 1555.93 82.0130  22
   3  -4 -11 1422.07 77.7156  23
  -3  -4  10 2155.99 111.837  22
   3  -4 -10 2081.16 105.351  23
  -3  -4   9 446.123 59.7356  22
   3  -4  -9 494.119 58.0858  23
   3  -4  -8 2199.65 114.445  23
  -3  -4   8 2204.20 123.689  22
  -3  -4   8 2248.29 105.074  14
   3  -4  -7 2960.81 131.286  23
  -3  -4   7 2808.72 137.583  22
   3  -4  -6 24.2953 95.9058  18
  -3  -4   6 69.3611 80.9266   1
   3  -4  -5 9376.52 591.029  18
  -3  -4   5 10225.3 600.307   1
  -3  -4   4 869.237 151.042   6
   3  -4  -4 868.308 194.616  18
  -3  -4   4 614.720 139.495   1
   3  -4  -4 722.109 174.189  19
  -3  -4   3 6355.90 370.084   6
   3  -4  -3 6122.55 436.708  19
   3  -4  -3 5995.43 425.104  18
  -3  -4   3 7449.23 406.961   1
  -3  -4   2 33728.0 940.395   6
   3  -4  -2 31236.2 1068.12  19
   3  -4  -2 32656.6 1036.97  18
  -3  -4   1 6565.85 333.954   6
   3  -4  -1 7351.75 383.168  18
  -3  -4   1 6592.68 398.592  21
  -3  -4   0 60123.3 1331.95   6
   3  -4   0 62760.0 1329.27  18
  -3  -4   0 62022.6 1537.52  21
  -3  -4  -1 59128.0 1492.48  21
   3  -4   1 57754.4 1349.44  19
   3  -4   1 53792.1 1373.55   1
  -3  -4  -1 56987.0 1273.48   6
   3  -4   2 7711.93 335.634  19
   3  -4   2 7498.14 411.297   1
  -3  -4  -2 7621.54 450.396  21
  -3  -4  -3 1196.20 183.466  21
   3  -4   3 1425.83 134.559  19
   3  -4   3 1375.67 177.672   1
  -3  -4  -4 16988.6 778.926  21
  -3  -4  -4 15266.5 753.060  20
   3  -4   4 15866.4 692.656   1
  -3  -4  -5 903.711 199.695  20
  -3  -4  -5 845.874 186.308  21
   3  -4   5 1014.80 178.003   4
   3  -4   5 765.741 157.416   1
  -3  -4  -6 5004.72 481.161  20
  -3  -4  -6 5588.32 489.045  21
   3  -4   6 5892.84 469.239   1
   3  -4   6 5302.33 428.290   4
  -3  -4  -7 6111.50 206.049  13
  -3  -4  -8 10213.2 293.627  13
  -3  -4  -9 1679.38 103.054  13
  -3  -4 -10 175.161 36.7208  13
   3  -3 -12 14.1833 16.2160  23
  -3  -3  11 2891.83 116.802  22
   3  -3 -11 2607.53 110.564  23
  -3  -3  10 501.727 56.6251  22
   3  -3 -10 431.043 51.8367  23
   3  -3  -9 3730.53 152.733  23
  -3  -3   9 3557.08 158.245  22
  -3  -3   8 23177.2 524.623  22
  -3  -3   8 22459.0 480.671  14
  -3  -3   7 9214.56 246.934  14
  -3  -3   7 9990.67 280.917  22
   3  -3  -6 8618.91 606.429  18
   3  -3  -5 15106.9 727.577  19
   3  -3  -5 15158.0 797.756  18
  -3  -3   5 17354.6 779.791   1
   3  -3  -4 40093.7 1240.81  19
   3  -3  -4 39993.1 1317.22  18
  -3  -3   4 41209.0 1207.10   1
  -3  -3   3 51044.3 1333.86   6
   3  -3  -3 51336.3 1415.43  19
   3  -3  -3 53709.0 1491.46  18
   3  -3  -2 199126. 3853.75  19
  -3  -3   2 194901. 3719.99   6
   3  -3  -2 200032. 3866.68  18
  -3  -3   2 200192. 3641.31   1
  -3  -3   1 11925.8 464.492   6
   3  -3  -1 11612.0 498.236  18
  -3  -3   1 11872.9 513.824  21
   3  -3  -1 11372.7 524.855  19
  -3  -3   0 54272.7 1333.53  21
   3  -3   0 52067.3 1248.79  18
  -3  -3   0 54180.9 1233.11   6
   3  -3   0 52230.9 1352.45  19
  -3  -3  -1 52597.7 1330.39  21
   3  -3   1 56336.5 1109.82  18
  -3  -3  -1 54810.3 1218.64   6
   3  -3   1 52070.5 1239.14   1
   3  -3   2 4176.28 243.317  19
  -3  -3  -2 3702.11 291.423  20
   3  -3   2 3855.89 260.221   1
  -3  -3  -2 3670.84 284.420  21
  -3  -3  -3 71481.6 1715.48  21
  -3  -3  -3 69695.5 1745.34  20
   3  -3   3 68908.1 1372.86  19
   3  -3   3 65770.8 1569.25   1
   3  -3   4 18591.5 734.916   4
  -3  -3  -4 17765.0 757.694  21
  -3  -3  -4 18307.8 792.232  20
   3  -3   4 17537.3 688.349   1
  -3  -3  -5 6498.85 470.848  21
   3  -3   5 6139.66 415.198   1
  -3  -3  -5 6527.43 489.680  20
   3  -3   5 6424.61 435.141   4
  -3  -3  -6 3196.71 354.709  21
  -3  -3  -6 3653.99 396.020  20
   3  -3   6 3045.78 312.231   4
   3  -3   6 3251.52 328.007   1
  -3  -3  -7 1103.51 78.5106  13
  -3  -3  -8 2844.05 136.907  13
  -3  -3  -9 2776.24 133.555  13
  -3  -3 -10 469.300 54.6336  13
   3  -3  11 1171.37 68.4294  11
  -3  -3 -11 1207.00 72.4711  13
   3  -3  12 11.9985 13.5144  11
  -3  -2  12 719.317 40.0163   9
   3  -2 -12 716.194 46.3958  23
   3  -2 -11 1064.72 70.2392  23
   3  -2 -10 924.457 73.3124  23
  -3  -2  10 871.282 72.9656  22
  -3  -2   9 4753.67 185.304  22
  -3  -2   8 7540.96 242.791  22
  -3  -2   8 7471.92 212.891  14
  -3  -2   7 2266.41 117.546  22
   3  -2  -7 2380.77 336.845  18
  -3  -2   7 2315.89 314.982   2
   3  -2  -6 22195.9 1040.07  18
  -3  -2   6 25600.4 1020.78   2
   3  -2  -5 3473.70 307.631  19
   3  -2  -5 4121.81 393.996  18
   3  -2  -4 46235.7 1362.63  18
   3  -2  -4 46216.3 1238.24  19
  -3  -2   3 48181.4 1264.39   6
   3  -2  -3 49482.3 1300.24  18
  -3  -2   2 7548.91 374.985   6
   3  -2  -2 7389.68 374.471  18
  -3  -2   2 7576.63 334.247   2
  -3  -2   1 46192.1 1118.51   6
  -3  -2   1 44608.7 956.122   2
   3  -2  -1 44832.3 1058.98  18
  -3  -2   1 46958.2 1151.89  21
  -3  -2   0 10052.9 431.879  21
   3  -2   0 9206.87 397.766  19
  -3  -2   0 9818.79 406.082   6
   3  -2   0 9941.30 355.440  18
  -3  -2  -1 31758.5 835.609   6
   3  -2   1 32626.3 731.335  18
   3  -2   1 31463.0 792.952   1
  -3  -2  -1 31009.5 882.015  21
   3  -2   1 31835.5 868.340  19
  -3  -2  -2 2809.25 210.010   6
  -3  -2  -2 2618.32 221.779  21
  -3  -2  -2 2816.97 237.417  20
   3  -2   2 3164.20 205.416   1
   3  -2   2 2647.32 206.180  19
  -3  -2  -3 53065.9 1344.98  21
  -3  -2  -3 54782.5 1410.58  20
   3  -2   3 51165.4 1222.90   1
  -3  -2  -4 10024.9 521.448  21
  -3  -2  -4 10596.4 563.791  20
   3  -2   4 10097.4 460.624   1
   3  -2   4 10539.4 511.012   4
  -3  -2  -5 13046.2 649.237  21
  -3  -2  -5 13891.0 705.984  20
   3  -2   5 13140.2 613.957   4
   3  -2   5 12685.9 572.883   1
   3  -2   6 943.431 177.371   4
  -3  -2  -6 886.675 181.289  21
  -3  -2  -6 1025.33 206.766  20
   3  -2   6 926.594 169.848   5
   3  -2   7 7752.65 530.046   5
  -3  -2  -7 8184.33 238.964  13
  -3  -2  -8 6136.07 208.681  13
  -3  -2  -9 5915.03 205.542  13
  -3  -2 -10 4695.47 172.351  13
   3  -2  11 79.8460 24.9512  11
  -3  -2 -11 120.920 29.9726  13
   3  -2  12 1151.01 55.9779  11
  -3  -1  12 1291.67 55.2723   9
   3  -1 -12 1326.35 63.6266  23
  -3  -1  11 2854.85 109.458  11
   3  -1 -11 3219.36 124.095  23
  -3  -1  10 4805.88 164.152  11
  -3  -1  10 4780.04 177.338  22
  -3  -1   9 4523.47 164.641  11
  -3  -1   9 4634.64 180.816  22
  -3  -1   8 15234.4 348.401  14
  -3  -1   8 15072.1 382.846  22
   3  -1  -7 12489.1 785.143  18
  -3  -1   7 14400.0 797.088   2
   3  -1  -6 41553.8 1443.76  18
  -3  -1   6 43006.0 1392.06   2
   3  -1  -5 26386.1 993.660  18
  -3  -1   5 27664.6 974.859   2
   3  -1  -4 10301.1 503.101  18
   3  -1  -4 9106.67 426.798  17
  -3  -1   4 9586.67 486.058   2
   3  -1  -3 49683.9 1213.93  18
   3  -1  -3 49166.0 1122.86  17
  -3  -1   3 51597.8 1247.01   2
  -3  -1   2 86082.9 1835.29   6
  -3  -1   2 88536.8 1747.48   2
   3  -1  -2 84138.3 1732.58  18
   3  -1  -2 82922.7 1613.32  17
  -3  -1   1 118311. 2214.18   2
  -3  -1   1 114846. 2360.42   6
   3  -1  -1 124062. 2258.86  18
   3  -1  -1 120681. 2107.27  17
   3  -1   0 51734.9 921.544  17
  -3  -1   0 51800.8 1002.32   2
  -3  -1   0 49741.8 1184.06   6
  -3  -1  -1 28318.7 790.683   3
  -3  -1  -1 28032.1 775.394   6
  -3  -1  -1 29156.4 791.752  20
   3  -1   1 29154.0 682.331   1
   3  -1   1 30000.3 577.555  17
  -3  -1  -1 29146.9 787.663  21
  -3  -1  -2 59126.5 1427.50   3
  -3  -1  -2 62357.3 1459.75  20
   3  -1   2 66661.2 1340.93  19
  -3  -1  -2 63652.3 1419.08  21
  -3  -1  -2 66171.1 1427.67   6
   3  -1   2 62440.1 1275.04   1
   3  -1   3 680.874 114.090   4
  -3  -1  -3 761.862 122.323  21
   3  -1   3 898.702 106.917   1
  -3  -1  -3 846.566 135.962   3
  -3  -1  -4 10429.2 544.331  20
   3  -1   4 10491.4 432.206   1
  -3  -1  -4 10987.0 518.265   3
   3  -1   4 10717.2 495.247   4
  -3  -1  -4 11038.4 511.837  21
  -3  -1  -5 4036.80 328.131  21
  -3  -1  -5 4276.61 371.013  20
   3  -1   5 3750.52 308.991   5
   3  -1   5 3990.11 315.894   4
  -3  -1  -6 3939.82 349.442  21
  -3  -1  -6 4496.12 421.966  20
   3  -1   6 3462.03 325.849   5
   3  -1   6 3856.46 341.154   4
   3  -1   7 743.947 163.453   4
  -3  -1  -7 739.850 184.011  20
   3  -1   7 982.748 179.769   5
  -3  -1  -8 10406.0 284.844   8
  -3  -1  -8 10649.1 292.241  13
  -3  -1  -9 6794.50 222.330  13
  -3  -1 -10 1662.63 97.8940  13
   3  -1  11 583.716 50.7037  11
  -3  -1 -11 605.904 54.4059  13
   3  -1  12 1188.22 56.5896  11
  -3  -1 -12 1103.07 59.7946  13
   3   0 -12 1234.91 61.0813  23
  -3   0  12 1250.06 53.9092   9
  -3   0  11 836.621 59.4222  11
  -3   0  11 894.174 58.1452   9
   3   0 -11 995.860 67.9604  23
  -3   0  10 2417.25 113.123  11
  -3   0   9 16676.0 400.059  11
  -3   0   9 16970.9 375.820  14
  -3   0   9 17720.8 421.385  22
  -3   0   8 7674.46 227.673  11
  -3   0   8 7700.40 213.425  14
  -3   0   8 7593.82 239.011  22
  -3   0   7 17492.5 885.214   2
   3   0  -7 18048.7 943.804  18
   3   0  -6 11439.0 655.363  18
  -3   0   6 10244.5 612.155   2
   3   0  -5 576.452 131.220  18
   3   0  -5 321.828 92.2149  17
  -3   0   5 285.095 99.5611   2
  -3   0   4 13982.4 599.250   2
   3   0  -4 14607.1 565.258  18
   3   0  -4 13644.5 531.270  17
  -3   0   3 9999.23 445.154   2
   3   0  -3 9308.81 401.341  18
   3   0  -3 9333.75 372.004  17
  -3   0   2 19694.1 656.607   6
   3   0  -2 19724.9 528.288  17
  -3   0   2 19277.5 597.365   2
  -3   0   1 130559. 2440.40   2
  -3   0   1 134302. 2429.07   3
  -3   0   1 133273. 2574.90   6
   3   0  -1 129987. 2356.68  17
  -3   0   0 29873.0 757.892  21
  -3   0   0 28507.6 757.861   3
   3   0   0 31219.7 658.469  17
  -3   0   0 30953.4 822.752   6
  -3   0   0 30861.2 704.568   2
  -3   0  -1 14726.4 503.453   6
  -3   0  -1 15853.1 493.924  20
  -3   0  -1 15229.9 514.008   3
   3   0   1 14404.4 350.153   1
  -3   0  -1 15173.9 474.119  21
  -3   0  -1 14983.3 406.962   2
   3   0   2 172.582 52.7706   4
  -3   0  -2 263.421 63.8728  21
  -3   0  -2 169.667 64.6196  20
  -3   0  -2 188.253 57.6417   6
  -3   0  -2 81.4380 48.2948   3
   3   0   2 344.680 47.3024   1
  -3   0  -3 7022.08 380.317   3
  -3   0  -3 7503.72 395.858  20
  -3   0  -3 6589.15 324.772  21
   3   0   3 6393.37 335.194   4
  -3   0  -4 7050.45 406.309   3
  -3   0  -4 7375.79 432.642  20
   3   0   4 6851.98 388.215   5
  -3   0  -4 6595.57 359.629  21
   3   0   4 6483.34 362.782   4
  -3   0  -5 27322.5 929.281   3
  -3   0  -5 25954.9 970.668  20
   3   0   5 26388.9 901.809   5
   3   0   5 26025.6 883.942   4
  -3   0  -6 11430.6 669.183  20
   3   0   6 10996.7 583.838   4
   3   0   6 9704.56 552.112   5
  -3   0  -6 10020.2 562.990   3
  -3   0  -7 630.834 173.450  20
   3   0   7 531.231 140.889   4
   3   0   7 390.187 121.254   5
  -3   0  -8 1431.14 88.1555   8
  -3   0  -8 1491.19 91.8612  13
  -3   0  -8 1545.55 86.9167  12
  -3   0  -9 3587.11 136.979  12
  -3   0  -9 3618.28 148.942   8
  -3   0  -9 3580.42 151.692  13
   3   0  10 2448.15 112.222  11
  -3   0 -10 2250.00 114.703  13
   3   0  11 321.482 38.3521  11
  -3   0 -11 365.813 44.0951  13
   3   0  12 61.5620 16.9148  11
  -3   0 -12 98.6741 22.7218  13
   3   1 -12 1268.53 59.0504  23
  -3   1  12 1276.03 53.3377   9
  -3   1  12 1275.13 59.0379  11
  -3   1  11 3007.51 116.758  11
   3   1 -11 2956.53 118.678  23
  -3   1  11 2973.53 109.221   9
  -3   1  10 4740.20 168.602  11
  -3   1   9 4421.69 166.378  11
  -3   1   9 4381.02 146.383  14
  -3   1   8 14969.0 365.608  11
  -3   1   8 15350.8 379.341  22
  -3   1   8 15233.6 347.042  14
  -3   1   7 13483.8 768.984   2
   3   1  -7 14684.2 813.454  18
   3   1  -6 41926.1 1191.26  20
  -3   1   6 43228.9 1385.60   2
   3   1  -6 40025.6 1292.67  18
   3   1  -6 41957.7 1302.53  17
   3   1  -5 29256.9 922.314  18
   3   1  -5 26905.2 905.326  17
  -3   1   5 29607.0 1018.13   2
  -3   1   4 10051.1 507.850   2
   3   1  -4 10161.6 452.628  18
   3   1  -4 11308.4 470.027  17
  -3   1   3 49594.2 1228.94   2
   3   1  -3 46725.1 1115.70  17
  -3   1   2 82912.2 1577.38   3
  -3   1   2 83501.7 1809.95   6
   3   1  -2 83840.8 1674.14  17
  -3   1   2 85964.8 1762.59   2
  -3   1   1 117586. 2365.74   6
  -3   1   1 121063. 2246.79   3
   3   1  -1 118943. 2231.74  17
   3   1  -1 122058. 2093.04   5
  -3   1   1 117761. 2292.63   2
  -3   1   0 49973.2 1178.47   6
  -3   1   0 49437.5 1135.38   3
   3   1   0 52325.5 1070.27  17
   3   1   0 50752.5 1040.59   5
  -3   1   0 52127.3 1110.49   2
   3   1   1 28239.1 691.792   4
  -3   1  -1 29084.1 778.062   6
  -3   1  -1 29146.7 716.075  20
  -3   1  -1 28475.5 792.563   3
  -3   1  -1 28646.9 667.228  21
   3   1   1 30012.5 730.041   5
  -3   1  -1 27330.6 696.597   2
  -3   1  -2 66242.0 1430.03   6
  -3   1  -2 62498.0 1277.03  21
  -3   1  -2 63953.0 1398.02  20
  -3   1  -2 61421.5 1453.72   3
   3   1   2 63426.5 1344.03   4
   3   1   2 63359.2 1393.38   5
   3   1   3 779.612 111.780   4
  -3   1  -3 667.450 113.819  20
  -3   1  -3 989.818 107.997  21
  -3   1  -3 798.432 129.411   3
   3   1   3 576.477 104.727   5
  -3   1  -4 11342.3 532.755   3
   3   1   4 10659.1 496.582   5
   3   1   4 10702.5 476.829   4
  -3   1  -4 10337.1 513.208  20
  -3   1  -5 3802.03 316.518   3
  -3   1  -5 4187.38 352.893  20
   3   1   5 4178.50 317.649   4
   3   1   5 3496.67 298.024   5
  -3   1  -6 4162.58 392.574  20
   3   1   6 3759.31 337.482   5
  -3   1  -6 4342.07 363.350   3
   3   1   6 4450.88 362.866   4
   3   1   7 579.448 148.808   4
  -3   1  -7 1003.45 206.846  20
   3   1   7 616.669 144.533   5
  -3   1  -8 10586.4 286.488   8
  -3   1  -8 10570.9 289.753  13
  -3   1  -8 10853.9 282.721  12
  -3   1  -9 6898.11 208.746  12
   3   1   9 6943.71 209.493  11
  -3   1  -9 6496.53 214.624   8
  -3   1  -9 6701.43 218.187  13
   3   1  10 1634.66 89.3543  11
  -3   1 -10 1521.36 91.1166   8
  -3   1 -10 1761.36 99.4852  13
  -3   1 -10 1586.81 85.3308  12
   3   1  11 614.338 49.4560  11
  -3   1 -11 606.262 54.7620  13
  -3   1 -12 1248.33 63.4962  13
  -3   2  12 692.938 42.9324  11
   3   2 -12 715.424 41.6472  23
  -3   2  11 1118.71 69.3376  11
  -3   2  11 1032.14 60.1796   9
  -3   2  10 853.421 69.0319  11
  -3   2  10 800.179 60.4363   9
  -3   2   9 4446.37 169.742  11
  -3   2   9 4494.10 147.368  14
  -3   2   8 7795.18 234.037  11
  -3   2   8 7604.49 213.127  14
  -3   2   7 2510.36 118.036  22
  -3   2   7 2236.54 310.255   2
   3   2  -7 2222.48 268.740  20
   3   2  -7 2163.19 295.460  17
  -3   2   6 25526.8 1017.48   2
   3   2  -6 24791.6 897.020  20
   3   2  -6 24522.8 909.865  18
   3   2  -6 25253.2 964.580  17
  -3   2   5 3910.57 342.710   2
   3   2  -5 4430.46 314.305  18
   3   2  -5 3739.67 305.305  17
  -3   2   4 47262.0 1297.08   2
   3   2  -4 45237.1 1190.60  17
  -3   2   3 50451.1 1298.26   6
   3   2  -3 49603.7 1190.24  17
  -3   2   3 47728.7 1251.19   2
  -3   2   2 7690.44 376.354   6
  -3   2   2 7709.39 290.414   3
   3   2  -2 7476.81 334.558  17
  -3   2   2 6989.05 354.541   2
  -3   2   1 46596.9 1104.00   6
  -3   2   1 44989.9 1027.09   3
   3   2  -1 44038.4 1026.19  17
   3   2  -1 45724.9 856.019   5
  -3   2   1 43067.3 1068.86   2
  -3   2   0 9794.60 398.550   6
  -3   2   0 9658.66 394.361   3
   3   2   0 9187.94 362.000  17
   3   2   0 10037.4 314.202   5
  -3   2   0 9450.87 381.247   2
   3   2   0 9636.81 263.155   4
  -3   2  -1 32061.3 837.837   6
  -3   2  -1 33058.7 745.284  20
  -3   2  -1 32671.7 889.884   3
   3   2   1 31049.1 771.559   5
  -3   2  -1 30998.5 803.810   2
   3   2   1 31908.1 719.309   4
  -3   2  -2 2870.30 212.591   6
  -3   2  -2 2720.85 191.502  20
  -3   2  -2 2938.76 239.569   3
   3   2   2 2492.58 191.098   5
   3   2   2 2607.80 175.717   4
  -3   2  -3 52245.1 1270.69  20
  -3   2  -3 55975.7 1379.50   3
   3   2   3 53091.5 1275.26   5
   3   2   3 49387.9 1207.74   4
  -3   2  -4 10041.4 517.566   3
   3   2   4 10228.9 488.016   5
  -3   2  -4 10686.6 517.569  20
   3   2   4 10265.4 469.735   4
  -3   2  -5 13072.8 641.984  20
  -3   2  -5 12965.5 624.229   3
   3   2   5 13126.4 601.590   5
   3   2   5 12098.4 571.876   4
   3   2   6 1176.27 193.999   4
  -3   2  -6 1108.55 206.782  20
  -3   2  -6 932.223 174.613   3
   3   2   6 987.161 177.032   5
  -3   2  -7 8206.40 604.304  20
   3   2   7 7005.78 494.827   5
  -3   2  -7 8109.06 228.245   8
  -3   2  -7 7860.15 228.218  13
   3   2   8 6132.28 192.239  11
  -3   2  -8 6175.80 202.215   8
  -3   2  -8 6329.92 205.550  13
   3   2   9 5807.20 184.873  11
  -3   2  -9 5627.52 195.195   8
  -3   2  -9 5776.57 199.221  13
  -3   2  -9 5807.65 191.158  12
   3   2  10 4529.14 154.694  11
  -3   2 -10 4986.14 172.768   8
  -3   2 -10 4874.69 172.240  13
  -3   2 -10 4537.90 158.039  12
  -3   2 -11 48.3338 20.2263  12
   3   2  11 70.8899 22.0201  11
  -3   2 -11 94.5400 28.8151  13
  -3   2 -12 1117.21 58.1224  13
  -3   3  12 11.6450 13.5077  11
  -3   3  11 2641.32 108.237  11
  -3   3  11 2673.13 96.9721   9
  -3   3  10 511.565 55.2533  11
  -3   3  10 412.306 43.4806   9
  -3   3   9 3368.22 145.951  11
  -3   3   9 3676.45 139.511   9
  -3   3   9 3550.98 126.739  14
  -3   3   8 23201.6 511.864  11
  -3   3   8 22477.4 493.137   9
  -3   3   8 23609.3 481.927  14
  -3   3   7 9729.53 268.801  11
  -3   3   7 10215.1 253.994  14
  -3   3   6 9106.89 590.017   2
   3   3  -6 10220.2 537.974  18
   3   3  -6 9190.84 561.209  17
  -3   3   5 16292.4 751.054   2
   3   3  -5 16730.4 704.099  17
  -3   3   4 43014.1 1243.10   2
   3   3  -4 41002.6 1149.69  17
  -3   3   3 53002.5 1361.78   6
   3   3  -3 56441.6 1335.43  17
  -3   3   3 53115.4 1372.36   2
  -3   3   2 194910. 3654.28   6
  -3   3   2 197239. 3522.27   3
   3   3  -2 190179. 3618.45  17
  -3   3   2 196321. 3698.96   2
  -3   3   1 10722.5 440.572   6
  -3   3   1 11816.2 439.745   3
   3   3  -1 11521.4 445.939  17
  -3   3   1 12036.8 481.025   2
  -3   3   0 55082.8 1270.43   6
  -3   3   0 58715.5 1329.62   3
   3   3   0 56068.1 1283.70  17
   3   3   0 56599.3 1159.88   5
  -3   3   0 58709.0 1327.59   2
  -3   3  -1 53234.7 1225.45   6
  -3   3  -1 53671.5 1313.38   3
   3   3   1 54421.8 1175.34   5
  -3   3  -1 52298.4 1242.55   2
   3   3   1 54324.1 1086.92   4
  -3   3  -2 4160.37 239.671  20
  -3   3  -2 4039.74 294.929   3
   3   3   2 4305.04 258.067   5
   3   3   2 3972.52 221.458   4
  -3   3  -3 69654.0 1571.16  20
   3   3   3 69103.3 1581.46   5
   3   3   3 65573.3 1507.66   4
  -3   3  -4 19025.8 724.288  20
  -3   3  -4 19406.0 773.413   3
   3   3   4 17959.5 697.983   5
   3   3   4 18915.5 683.041   4
  -3   3  -5 6468.12 442.256  20
   3   3   5 6218.10 417.494   5
  -3   3  -5 6649.03 450.698   3
   3   3   5 7018.24 431.900   4
  -3   3  -6 3402.96 353.506  20
  -3   3  -6 3769.85 354.533   3
   3   3   6 3547.90 332.643   5
   3   3   6 3189.02 323.248   4
  -3   3  -7 1117.68 75.3985   8
  -3   3  -8 2798.12 129.229   8
  -3   3  -8 2875.94 131.551  13
  -3   3  -9 2637.17 125.702   8
  -3   3  -9 2758.84 128.328  13
  -3   3  -9 2664.97 122.887  12
  -3   3 -10 401.387 48.9517   8
  -3   3 -10 510.042 54.6224  13
  -3   3 -10 472.056 50.3825  12
  -3   3 -11 1230.99 66.4225  12
  -3   3 -11 1219.43 71.6218   8
  -3   3 -11 1109.02 69.1599  13
  -3   3 -12 27.5697 15.9724  13
  -3   4  11 1468.36 76.3159  11
  -3   4  11 1334.71 63.2761   9
  -3   4  10 2203.50 108.428  11
  -3   4  10 2070.07 94.1710   9
  -3   4   9 571.437 59.9434  11
  -3   4   9 456.783 49.6154   9
  -3   4   9 550.002 48.2077  14
  -3   4   8 2062.85 104.378   9
  -3   4   8 2184.57 98.6999  14
  -3   4   8 2137.91 114.744  11
  -3   4   7 2900.58 131.497  11
  -3   4   7 2777.34 120.837   9
  -3   4   7 3032.38 118.106  14
   3   4  -6 226.771 94.9353  18
   3   4  -6 257.917 110.356  17
  -3   4   6 183.761 99.6518   2
  -3   4   5 9328.85 562.224   2
   3   4  -5 9304.62 526.101  17
  -3   4   4 589.946 124.808   6
   3   4  -4 507.126 121.893  17
  -3   4   4 714.018 148.194   2
  -3   4   3 6580.43 373.712   6
   3   4  -3 6764.62 384.921  17
  -3   4   3 6793.14 412.476   2
   3   4  -2 35984.9 986.271  17
  -3   4   2 34637.6 942.043   6
  -3   4   2 34054.7 904.763   3
  -3   4   2 35260.5 1023.67   2
  -3   4   1 6171.75 317.586   6
   3   4  -1 6060.69 338.237  17
  -3   4   1 6424.24 337.818   3
  -3   4   1 6433.10 365.705   2
  -3   4   0 60672.9 1321.10   6
   3   4   0 61978.3 1259.41   5
   3   4   0 55697.9 1378.17  17
  -3   4   0 57804.0 1408.46   3
  -3   4   0 59593.4 1423.08   2
  -3   4  -1 55525.7 1409.46   3
   3   4   1 55963.4 1273.19   5
  -3   4  -1 59431.9 1295.52   6
  -3   4  -1 58690.4 1390.65   2
  -3   4  -2 7762.37 435.495   3
   3   4   2 7491.74 367.735   5
   3   4   2 7371.79 322.741   4
  -3   4  -3 1320.28 160.722  20
   3   4   3 1395.77 167.292   5
  -3   4  -3 1253.03 185.830   3
   3   4   3 1147.03 142.520   4
  -3   4  -4 17432.8 701.394  20
  -3   4  -4 16650.1 744.613   3
   3   4   4 15729.9 663.598   5
   3   4   4 16710.7 651.924   4
   3   4   5 1053.04 174.917   4
  -3   4  -5 910.737 167.831  20
  -3   4  -5 1190.28 202.285   3
   3   4   5 810.658 157.496   5
  -3   4  -6 5654.19 461.332  20
  -3   4  -6 5452.82 450.384   3
   3   4   6 5072.17 411.534   5
   3   4   6 4424.18 386.852   4
  -3   4  -7 5848.25 183.932  16
  -3   4  -7 6056.74 196.411   8
  -3   4  -8 9802.39 276.818   8
  -3   4  -9 1802.64 101.482   8
  -3   4  -9 1750.04 101.242  13
  -3   4  -9 1777.67 99.4803  12
  -3   4 -10 239.507 38.0077  12
  -3   4 -10 227.941 39.2110   8
  -3   4 -10 251.993 42.1965  13
  -3   4 -11 216.486 30.8416  12
  -3   4 -11 145.533 27.5544   8
  -3   4 -11 205.262 32.1162  13
  -3   5  11 763.718 52.3474  11
  -3   5  11 684.359 41.6060   9
  -3   5  10 618.230 56.2776  11
  -3   5  10 603.054 49.5210   9
  -3   5   9 1340.13 89.2923  11
  -3   5   9 1369.08 80.4276   9
  -3   5   8 12376.6 334.622  11
  -3   5   8 13248.1 321.891   9
  -3   5   8 13047.4 307.298  14
  -3   5   7 7164.07 227.145  11
  -3   5   7 7140.31 214.069   9
  -3   5   7 7237.79 205.631  14
  -3   5   6 7395.32 214.188   9
  -3   5   6 7627.62 207.256  14
  -3   5   6 7311.74 225.246  11
   3   5  -5 5534.65 415.541  17
  -3   5   5 5659.77 445.197   2
   3   5  -4 20388.6 802.438  17
  -3   5   4 19530.6 822.880   2
   3   5  -3 8115.28 454.786  17
  -3   5   3 7787.61 465.316   2
   3   5  -2 5891.00 366.261  17
  -3   5   2 5619.56 328.756   3
  -3   5   2 5534.79 374.487   2
   3   5  -1 39315.2 1099.00  17
  -3   5   1 39158.7 1068.28   3
  -3   5   1 37284.5 1102.06   2
   3   5   0 5144.33 274.381   5
   3   5   0 4821.51 326.609  17
  -3   5   0 5506.78 353.737   2
   3   5   1 53206.3 1271.86   5
  -3   5  -1 55796.7 1431.97   3
  -3   5  -2 54855.8 1473.79   3
   3   5   2 53800.5 1338.76   5
  -3   5  -3 8287.82 504.760   3
   3   5   3 7670.35 432.138   5
  -3   5  -4 12887.2 677.764   3
   3   5   4 12067.8 588.676   5
   3   5   4 11170.4 537.655   4
  -3   5  -5 11408.9 667.419   3
   3   5   5 12195.0 636.971   5
   3   5   5 12362.2 621.919   4
  -3   5  -6 20310.3 451.246  16
  -3   5  -6 21791.4 465.253   8
  -3   5  -7 31420.1 631.601  16
  -3   5  -7 30846.7 643.902   8
  -3   5  -8 6957.87 207.419  16
  -3   5  -8 7215.24 225.653   8
  -3   5  -9 1186.24 82.4525   8
  -3   5  -9 1229.90 83.3114  13
  -3   5  -9 1250.67 84.6159  12
  -3   5 -10 860.450 63.7569   8
  -3   5 -10 730.390 60.2340  13
  -3   5 -10 704.308 57.3550  12
  -3   5 -11 1001.39 58.5647   8
  -3   5 -11 1104.66 61.3133  13
  -3   5 -11 1083.13 58.5312  12
  -3   6  11 347.899 34.0442  11
  -3   6  10 564.666 51.6277  11
  -3   6  10 580.128 45.5993   9
  -3   6   9 784.470 66.3443  11
  -3   6   9 742.717 57.4619   9
  -3   6   8 3023.62 139.046  11
  -3   6   8 3272.02 131.586   9
  -3   6   7 2776.07 133.014  11
  -3   6   7 3033.25 128.644   9
  -3   6   6 2964.75 134.074  11
  -3   6   6 2893.11 124.122   9
  -3   6   6 3073.09 120.628  14
  -3   6   5 6535.87 205.028  11
   3   6  -5 6088.72 455.140  17
  -3   6   5 6594.68 194.246   9
  -3   6   5 6434.32 185.135  14
   3   6  -4 20472.0 843.268  17
  -3   6   4 20218.5 872.948   2
   3   6  -3 31203.1 1047.89  17
  -3   6   3 32215.9 1094.59   2
   3   6  -2 13516.3 618.252  17
  -3   6   2 12503.4 564.382   3
  -3   6   2 14009.0 649.703   2
   3   6  -1 24510.9 871.713  17
  -3   6   1 24537.9 851.660   3
  -3   6   1 24657.2 884.821   2
   3   6   0 11297.3 471.658   5
   3   6   0 12035.8 570.767  17
  -3   6   0 11679.7 567.744   3
  -3   6   0 11860.5 574.338   2
   3   6   1 67200.8 1566.91   5
   3   6   1 65599.9 1672.48  17
  -3   6  -1 69012.6 1748.16   3
   3   6   2 38405.3 1115.01   5
  -3   6  -2 41167.9 1269.64   3
  -3   6  -3 29429.8 1089.40   3
   3   6   3 29018.8 976.014   5
  -3   6  -4 11475.3 674.269   3
   3   6   4 10550.0 580.375   5
  -3   6  -5 11260.6 696.223   3
   3   6   5 11438.4 638.901   5
  -3   6  -5 11685.0 292.086  16
  -3   6  -6 5575.15 185.935  16
  -3   6  -6 5915.40 194.739   8
  -3   6  -7 5497.61 191.003   8
  -3   6  -7 5507.61 184.727  16
  -3   6  -8 247.857 38.5441  16
  -3   6  -8 343.704 48.6458   8
  -3   6  -9 456.544 50.7639   8
  -3   6  -9 626.554 58.7388  13
  -3   6  -9 524.973 56.0362  12
  -3   6 -10 364.370 40.8396  12
  -3   6 -10 356.658 41.4706   8
  -3   6 -10 380.187 43.1319  13
  -3   6 -11 304.925 30.0684  12
  -3   6 -11 253.037 28.8194   8
  -3   6 -11 252.593 28.1839  13
  -3   7  11 169.881 22.3490  11
  -3   7  10 215.937 34.1834  11
  -3   7  10 194.981 26.5649   9
  -3   7   9 32.7067 26.7506  11
  -3   7   9 83.4993 24.1464   9
  -3   7   8 1115.85 80.7996  11
  -3   7   8 1111.17 72.8683   9
  -3   7   7 3137.34 143.241  11
  -3   7   7 3543.90 140.469   9
  -3   7   6 2784.92 132.328  11
  -3   7   6 2738.14 121.431   9
  -3   7   5 14276.2 358.230  11
  -3   7   5 14530.2 343.823   9
  -3   7   4 18739.0 427.661  11
   3   7  -4 17195.7 815.501  17
  -3   7   4 19499.1 415.897   9
  -3   7   4 17038.2 825.919   2
   3   7  -3 19043.0 823.597  17
  -3   7   3 18967.7 837.696   2
   3   7  -2 7309.38 473.670  17
  -3   7   2 6235.62 447.923   2
   3   7  -1 1886.87 236.859  17
  -3   7   1 2140.68 247.243   3
  -3   7   1 2067.76 245.729   2
   3   7   0 17538.7 757.228  17
  -3   7   0 17684.8 776.350   3
   3   7   1 6845.94 409.117   5
   3   7   1 6734.03 456.368  17
  -3   7  -1 7327.11 492.641   3
   3   7   2 80721.3 1949.38   5
  -3   7  -2 83377.5 2153.21   3
   3   7   3 44243.6 1327.34   5
  -3   7  -3 43656.3 1459.85   3
   3   7   4 1855.38 246.811   5
  -3   7  -4 2132.14 102.240  16
  -3   7  -4 2047.43 288.768   3
  -3   7  -4 2122.13 98.1294   7
  -3   7  -5 101.422 30.3313   7
  -3   7  -5 54.3473 26.1579  16
  -3   7  -6 2775.49 126.381  16
  -3   7  -6 2932.01 132.809   8
  -3   7  -7 1066.34 79.7575   8
  -3   7  -7 1132.06 79.3265  16
  -3   7  -8 870.534 65.0682  16
  -3   7  -8 902.139 71.0925   8
  -3   7  -9 83.2912 29.2212  12
  -3   7  -9 66.4226 25.6980   8
  -3   7  -9 53.8761 26.7544  13
  -3   7 -10 579.130 45.8590  12
  -3   7 -10 537.035 44.8549   8
  -3   7 -10 567.026 45.4635  13
  -3   8  10 389.077 37.0318  11
  -3   8  10 386.902 29.9375   9
  -3   8   9 239.907 36.6350  11
  -3   8   9 265.257 32.1449   9
  -3   8   8 536.777 55.8872  11
  -3   8   8 551.556 50.7276   9
  -3   8   7 1906.20 106.664  11
  -3   8   7 1957.36 99.7765   9
  -3   8   6 553.319 61.2226  11
  -3   8   6 550.378 56.4688   9
  -3   8   5 3344.56 147.337  11
  -3   8   5 3743.78 144.256   9
  -3   8   4 5172.08 184.495  11
  -3   8   4 5341.12 175.738   9
  -3   8   3 15799.7 382.381  11
  -3   8   3 16420.7 370.733   9
  -3   8   2 1788.30 95.7704  11
   3   8  -2 2062.90 268.832  17
  -3   8   2 1716.05 240.169   2
   3   8  -1 2715.88 299.195  17
  -3   8   1 3149.55 328.592   3
  -3   8   1 2901.04 312.261   2
   3   8   0 282.484 106.946  17
  -3   8   0 470.096 134.999   3
   3   8   1 5065.37 417.649  17
  -3   8  -1 4891.79 434.812   3
   3   8   2 5154.20 399.694   5
   3   8   2 5028.52 427.215  17
  -3   8  -2 5777.70 488.053   3
  -3   8  -3 745.273 62.2168  16
  -3   8  -3 498.503 50.4585   7
  -3   8  -4 21703.3 480.279  16
  -3   8  -4 22067.5 472.563   7
  -3   8  -5 912.468 70.7487  16
  -3   8  -5 879.303 67.7843   7
  -3   8  -6 4563.15 167.783  16
  -3   8  -6 4518.77 170.285   8
  -3   8  -7 2604.87 119.354  16
  -3   8  -7 2662.88 123.472   8
  -3   8  -8 3197.46 124.466  16
  -3   8  -8 3315.52 132.588   8
  -3   8  -8 3074.64 126.071  12
  -3   8  -9 1020.38 56.6187  16
  -3   8  -9 1168.37 68.6846   8
  -3   8  -9 1074.09 65.1665  13
  -3   8  -9 1130.39 65.4224  12
  -3   8 -10 331.015 30.8742  12
  -3   8 -10 438.991 36.0873   8
  -3   8 -10 366.365 32.1739  13
  -3   9   9 106.892 25.5573  11
  -3   9   9 144.083 24.2024   9
  -3   9   8 2302.40 105.994  11
  -3   9   8 2524.46 102.114   9
  -3   9   7 707.233 59.0192   9
  -3   9   7 736.611 65.4217  11
  -3   9   6 4062.00 150.344   9
  -3   9   6 3756.22 154.301  11
  -3   9   5 6105.04 208.522  11
  -3   9   5 6505.97 202.900   9
  -3   9   4 854.283 73.0870  11
  -3   9   4 858.188 67.1320   9
  -3   9   3 289.409 46.8546  11
  -3   9   3 314.314 45.4656   9
  -3   9   2 7271.80 228.081  11
  -3   9   2 8001.20 228.647   9
  -3   9   1 2982.27 131.552  11
  -3   9   0 10054.5 265.100   7
  -3   9  -1 2659.23 117.276   7
  -3   9  -1 2771.64 117.832  16
  -3   9  -2 1441.14 87.1378  16
  -3   9  -2 1422.65 84.6355   7
  -3   9  -3 8801.61 251.688  16
  -3   9  -3 8852.92 246.931   7
  -3   9  -4 497.964 53.3833   7
  -3   9  -4 448.593 52.1514  16
  -3   9  -5 4862.89 174.912  16
  -3   9  -5 4673.24 166.356   7
  -3   9  -6 16.5347 20.8256  12
  -3   9  -6-3.87797 28.3783  16
  -3   9  -6 38.2955 26.1173   8
  -3   9  -7 4557.05 156.255  16
  -3   9  -7 4081.05 144.511  12
  -3   9  -7 4490.12 158.529   8
  -3   9  -8 1561.83 78.4283  12
  -3   9  -8 1653.70 80.1724  16
  -3   9  -8 1682.09 84.7107   8
  -3   9  -9 1688.39 66.7767  16
  -3   9  -9 1826.08 76.6508  13
  -3   9  -9 1677.43 71.3694  12
  -3  10   9 1174.17 55.7450  11
  -3  10   8 3564.18 123.808  11
  -3  10   8 3880.87 120.361   9
   3  10  -7 1312.55 67.1608  16
  -3  10   7 1329.51 79.3669  11
  -3  10   6 251.460 41.7420  11
  -3  10   6 282.182 42.5088   9
  -3  10   5 3467.04 147.020  11
  -3  10   5 3522.83 140.473   9
  -3  10   4 7703.23 239.245  11
  -3  10   4 8301.16 238.935   9
  -3  10   3 3664.86 152.218  11
  -3  10   3 3830.48 149.350   9
  -3  10   2 3438.10 146.482  11
  -3  10   1 3109.54 131.797   7
  -3  10   0 5609.01 184.954   7
  -3  10  -1 10307.8 271.414  16
  -3  10  -1 10413.2 277.875   7
  -3  10  -2 5050.03 175.068  16
  -3  10  -2 4931.82 173.262   7
  -3  10  -3 2507.78 119.405  16
  -3  10  -3 2494.09 117.327   7
  -3  10  -4 7391.84 221.090   7
  -3  10  -4 7383.25 226.031  16
  -3  10  -5 73.9833 26.6698   7
  -3  10  -5 138.468 34.2649  16
  -3  10  -6 135.490 32.0344  16
  -3  10  -6 161.728 33.8827   8
  -3  10  -7 15.3093 22.0577  16
  -3  10  -7 12.4166 22.7709   8
  -3  10  -8 674.679 46.2176  16
  -3  10  -8 792.794 52.4029   8
  -3  10  -8 667.937 42.0672  12
  -3  11   8 239.429 27.1037  11
  -3  11   7 3574.77 120.746  11
   3  11  -7 3408.41 103.438  16
  -3  11   6 197.696 35.4342  11
   3  11  -6 212.655 32.7466  16
  -3  11   5 715.393 61.0005  11
  -3  11   4 865.793 68.2918  11
  -3  11   3 759.199 66.9454  11
  -3  11   3 699.285 61.0344   7
  -3  11   2 5643.57 184.266   7
  -3  11   1 3370.30 137.588   7
  -3  11   0 9346.95 256.065   7
  -3  11  -1 3524.62 139.973   7
  -3  11  -2 1766.25 97.1044   7
  -3  11  -2 1763.96 94.1006  16
  -3  11  -3 1660.12 92.6797  16
  -3  11  -3 1668.94 92.6561   7
  -3  11  -4 2879.45 125.719  16
  -3  11  -4 3145.43 126.401   7
  -3  11  -5 169.280 32.2049   7
  -3  11  -5 230.594 39.6530  16
  -3  11  -6 49.8705 23.9122  16
  -3  11  -6 37.7608 21.6503   8
  -3  11  -7 226.473 30.0062  16
  -3  11  -7 243.901 31.6344   8
  -3  11  -8 82.8424 17.3652   8
  -3  12   7 504.726 33.5616   7
   3  12  -6 1026.22 53.3847  16
  -3  12   6 1025.92 56.3374   7
  -3  12   5 211.498 32.2541   7
  -3  12   4 2798.53 110.798   7
  -3  12   3 4925.06 159.585   7
  -3  12   2 293.380 40.2028   7
  -3  12   1 1261.82 78.7114   7
  -3  12   0 3939.93 143.829   7
  -3  12  -1 1120.49 73.5938   7
  -3  12  -2 522.847 49.0246  16
  -3  12  -2 562.471 54.2611   7
  -3  12  -3 123.335 29.2980   7
  -3  12  -3 153.598 32.2740  16
  -3  12  -4 2299.21 101.371  16
  -3  12  -4 2540.08 104.173   7
  -3  12  -5 276.438 33.6102  16
  -3  12  -5 235.134 32.8892   8
  -3  12  -6 569.068 42.4778  16
  -3  12  -6 559.136 41.6929   8
  -3  12  -7 680.265 39.1089  16
  -3  13   5 597.070 39.2250   7
   3  13  -5 589.107 39.2781  16
   3  13  -4 109.110 26.9488  16
  -3  13   4 66.6194 21.1919   7
  -3  13   3 1823.09 81.0207   7
  -3  13   2 1149.94 65.7466   7
  -3  13   1 1512.84 77.5505   7
  -3  13   0 666.167 52.7071   7
  -3  13  -1 4657.35 147.957   7
  -3  13  -2 854.896 57.0534   7
  -3  13  -2 832.770 51.5163  16
  -3  13  -3 695.406 47.0721  16
  -3  13  -3 724.023 50.6373   7
  -3  13  -4 595.871 42.6122  16
  -3  13  -5 512.258 37.0431  16
  -3  13  -5 423.150 33.5069   8
  -3  14   3 161.919 21.6027   7
   3  14  -3 198.901 24.1407  16
   3  14  -2 731.817 44.1233  16
  -3  14   2 681.439 42.6541   7
  -3  14   1 4005.45 118.525   7
  -3  14   0 791.561 48.5339   7
  -3  14  -1 511.204 39.2124   7
  -3  14  -2-10.5935 16.7448   7
   4 -14  -1 166.425 24.4352  22
   4 -14   0 1114.33 55.6469  22
  -4 -13   4 843.314 47.6996  15
  -4 -13   3 359.635 34.0747  15
  -4 -13   2 146.569 26.5726  15
  -4 -13   1 84.6704 22.4935  15
   4 -13   1 1438.97 76.3867  22
  -4 -13  -1 1325.94 61.8356  10
   4 -13   2 419.461 40.6089  22
   4 -13   3 175.810 25.0084  22
  -4 -12   6 529.776 35.8655  15
  -4 -12   5 1251.16 64.1190  15
  -4 -12   4 1186.65 67.5659  15
  -4 -12   3 2402.47 102.884  15
  -4 -12   2 7438.29 206.908  15
  -4 -12   1 10.3880 21.3936  15
  -4 -12   0 1262.35 69.7532  15
   4 -12   2 124.712 31.7098  22
   4 -12   3 1676.07 84.3133  22
  -4 -12  -4 463.823 47.7125  23
  -4 -11   7 27.4642 15.5871  22
  -4 -11   7 23.5766 13.4449  15
  -4 -11   7 27.0651 15.1147  14
  -4 -11   6 2225.49 89.7539  15
  -4 -11   6 2292.23 94.2840  22
  -4 -11   5 528.301 50.0705  15
  -4 -11   5 551.859 49.0965  22
  -4 -11   4 849.810 65.4296  15
  -4 -11   3 1942.94 101.744  15
  -4 -11   2 2056.49 104.929  15
  -4 -11   1 4162.40 154.106  15
  -4 -11   0 1419.23 81.5886  15
  -4 -11  -2 146.609 41.4138  23
   4 -11   3 275.649 41.2588  22
  -4 -11  -3 409.531 56.9741  23
  -4 -11  -4 249.983 43.1914  23
  -4 -11  -5 19.6120 21.6498  23
  -4 -11  -6 205.841 30.8602  23
  -4 -10   8 585.747 43.1279  22
   4 -10  -8 569.355 41.5997  23
   4 -10  -7 1210.60 69.1555  23
  -4 -10   7 1123.18 59.2577  15
  -4 -10   7 1240.90 71.2753  22
  -4 -10   6 1972.43 92.3409  15
   4 -10  -6 2046.99 97.5533  23
  -4 -10   6 1990.54 99.4678  22
  -4 -10   5 6954.85 206.798  15
  -4 -10   5 6217.02 201.212  22
  -4 -10   4 818.103 68.9090  15
  -4 -10   3 497.844 58.6492  15
  -4 -10   2 14729.8 364.738  15
  -4 -10   1 4801.61 172.433  15
  -4 -10   0 7620.08 223.728  15
  -4 -10  -1 3118.51 153.636  23
  -4 -10  -2 4717.69 190.860  23
   4 -10   3 13398.5 338.087  22
  -4 -10  -3 13426.9 361.010  23
  -4 -10  -4 1497.07 97.8877  23
  -4 -10  -5 285.736 44.9749  23
  -4 -10  -6 595.471 53.4838  23
   4  -9  -9 916.758 52.7702  23
  -4  -9   9 924.857 52.1717  22
  -4  -9   8 229.194 35.1390  22
  -4  -9   8 233.499 28.9654  14
   4  -9  -8 180.873 31.7747  23
  -4  -9   7 1564.00 77.1234  15
   4  -9  -7 1796.63 94.8937  23
  -4  -9   7 1756.64 95.4472  22
   4  -9  -6 806.957 66.4710  23
  -4  -9   6 809.134 63.2055  15
  -4  -9   6 834.649 69.2594  22
  -4  -9   5 5453.66 184.387  15
  -4  -9   5 4859.39 180.651  22
  -4  -9   4 1188.45 84.2247  15
  -4  -9   3 43407.7 857.115  15
  -4  -9   2 13470.7 344.206  15
  -4  -9   1 7331.29 225.245  15
  -4  -9   0 2882.44 125.484  15
  -4  -9   0 3026.88 148.548  23
  -4  -9  -1 6475.66 228.346  23
  -4  -9  -2 23368.3 541.356  23
  -4  -9  -3 6093.16 218.645  23
  -4  -9  -4 11365.3 319.331  23
  -4  -9  -5 2715.04 131.285  23
  -4  -8  10 50.8984 17.1872  22
  -4  -8   9 266.781 34.2834  22
   4  -8  -9 332.433 40.1014  23
  -4  -8   8 611.456 49.4207  14
   4  -8  -8 614.170 56.6191  23
  -4  -8   8 600.430 55.8650  22
  -4  -8   7 1479.37 93.5155  22
  -4  -8   7 1448.06 78.0747  15
   4  -8  -7 1602.25 94.9229  23
  -4  -8   6 3224.61 132.186  15
   4  -8  -6 3344.93 143.103  23
  -4  -8   6 3190.79 143.900  22
  -4  -8   5 12432.9 319.281  15
   4  -8  -5 11970.5 316.546  23
  -4  -8   5 11962.1 323.416  22
  -4  -8   4 2032.92 110.570  15
  -4  -8   3 2263.34 116.796  15
  -4  -8   2 3686.78 149.488  15
  -4  -8   1 2502.54 117.200  15
  -4  -8   0 11681.9 295.816  15
  -4  -8   0 11723.1 323.685  23
  -4  -8  -1 3309.30 128.891  15
  -4  -8  -1 3427.66 152.218  23
  -4  -8  -2 3820.78 164.152  23
  -4  -8  -3 17190.3 423.822  23
  -4  -8  -4 108.700 37.6663  23
  -4  -7  10 75.1691 21.3335  22
   4  -7 -10 87.0503 22.4098  23
  -4  -7   9 318.518 41.6434  22
  -4  -7   9 315.093 33.2249  14
   4  -7  -9 261.904 38.6175  23
  -4  -7   8 396.470 43.4794  14
   4  -7  -8 461.529 52.8832  23
  -4  -7   8 538.974 57.2560  22
   4  -7  -7 4240.46 163.421  23
  -4  -7   7 3887.18 162.039  22
  -4  -7   6 11421.3 294.411  15
   4  -7  -6 11786.7 310.374  23
  -4  -7   6 11221.3 315.261  22
  -4  -7   5 1996.21 106.897  15
   4  -7  -5 2003.34 106.200  23
  -4  -7   5 1842.91 108.124  22
  -4  -7   4 17151.5 405.962  15
   4  -7  -3 3651.46 345.690  18
  -4  -7   3 4139.09 157.254  15
   4  -7  -2 1858.22 225.378  19
   4  -7  -1 21906.7 834.213  19
   4  -7   0 12331.4 596.620  19
   4  -7   0 11769.9 687.709   1
  -4  -7   0 12515.9 735.633  21
  -4  -7  -1 3072.67 358.936  21
   4  -7   1 3026.99 288.277  19
   4  -7   1 3923.42 391.594   1
  -4  -7  -2 11463.9 740.641  21
   4  -7   2 11465.3 574.562  19
   4  -7   2 12335.2 712.819   1
  -4  -7  -3 5519.37 195.087  23
   4  -6 -11 534.486 37.9024  23
  -4  -6  11 576.337 38.2478  22
   4  -6 -10 970.407 62.9023  23
  -4  -6  10 1072.95 66.0443  22
  -4  -6   9 74.0599 30.4497  22
  -4  -6   9 133.170 27.3408  14
   4  -6  -9 65.3509 25.8607  23
  -4  -6   8 724.270 59.4287  14
   4  -6  -8 749.687 67.6243  23
  -4  -6   8 706.411 67.3425  22
  -4  -6   7 957.916 78.2997  22
   4  -6  -7 837.557 72.4190  23
  -4  -6   6 1125.59 73.7932  15
   4  -6  -6 1119.21 79.5938  23
  -4  -6   6 1166.06 85.7154  22
   4  -6  -5 1810.38 97.4312  23
  -4  -6   5 1888.68 99.6913  15
  -4  -6   5 1792.42 104.193  22
   4  -6  -4 11618.5 616.912  19
   4  -6  -4 11536.4 638.310  18
  -4  -6   4 12771.2 318.068  15
   4  -6  -3 2539.44 276.575  19
   4  -6  -3 2690.61 280.276  18
   4  -6  -2 3090.27 299.055  19
   4  -6  -2 3415.21 294.801  18
  -4  -6   1 456.859 139.133  21
   4  -6  -1 419.600 116.020  19
  -4  -6   0 13433.4 735.060  21
   4  -6   0 15286.0 639.863  19
   4  -6   1 7010.15 407.978  19
  -4  -6  -1 6929.15 519.502  21
   4  -6   1 7318.94 501.103   1
   4  -6   2 13531.3 574.176  19
   4  -6   2 13237.4 697.237   1
  -4  -6  -2 13083.6 749.418  21
  -4  -6  -3 3938.24 420.194  21
   4  -6   3 4571.86 399.864   1
   4  -6   4 7713.86 551.421   1
  -4  -5  11 750.613 49.1550  22
   4  -5 -11 734.271 48.9145  23
  -4  -5  10 1847.62 93.8501  22
   4  -5 -10 1913.70 93.9933  23
  -4  -5   9 2707.44 127.379  22
  -4  -5   9 2511.06 105.155  14
   4  -5  -9 2404.48 117.641  23
  -4  -5   8 2157.86 106.254  14
   4  -5  -8 2216.06 114.494  23
  -4  -5   8 2390.60 124.456  22
   4  -5  -7 6206.14 204.760  23
  -4  -5   7 5840.85 211.461  22
   4  -5  -6 4841.26 172.990  23
  -4  -5   6 5012.44 185.628  22
   4  -5  -5 5685.01 431.626  19
   4  -5  -4 944.386 196.566  19
   4  -5  -4 708.227 153.264  18
   4  -5  -3 4029.43 374.337  19
   4  -5  -3 3955.26 348.940  18
   4  -5  -2 1683.49 239.932  19
   4  -5  -2 1665.79 206.518  18
   4  -5  -1 25638.1 963.329  19
  -4  -5   1 24964.7 990.045  21
   4  -5  -1 27760.7 853.764  18
   4  -5   0 8827.51 489.211  19
  -4  -5   0 7832.66 514.116  21
   4  -5   1 17628.6 740.821   1
  -4  -5  -1 16728.7 789.219  21
   4  -5   1 18344.2 679.024  19
  -4  -5  -2 4044.35 381.468  21
   4  -5   2 4137.21 281.583  19
   4  -5   2 4518.69 361.855   1
  -4  -5  -3 7174.13 536.418  21
   4  -5   3 6961.92 467.334   1
  -4  -5  -4 11816.7 731.169  21
   4  -5   4 12932.6 682.189   1
   4  -5  11 221.821 24.7066  11
   4  -4 -11 752.160 52.3110  23
   4  -4 -10 605.965 56.6286  23
  -4  -4  10 684.787 59.0851  22
  -4  -4   9 7620.87 213.678  14
   4  -4  -9 7620.18 232.252  23
  -4  -4   9 8068.41 244.253  22
   4  -4  -8 9001.98 262.314  23
  -4  -4   8 8905.64 247.879  14
  -4  -4   8 8623.83 269.926  22
   4  -4  -7 7208.02 222.989  23
  -4  -4   7 6518.82 225.209  22
  -4  -4   6 8860.38 262.758  22
   4  -4  -6 8941.45 251.832  23
  -4  -4   5 4397.80 401.611   6
   4  -4  -5 4015.57 407.812  19
   4  -4  -5 5281.76 474.658  18
  -4  -4   4 3503.19 330.298   6
   4  -4  -4 3255.24 363.803  19
   4  -4  -4 3675.99 383.351  18
  -4  -4   3 14955.7 659.467   6
   4  -4  -3 13113.7 724.561  19
   4  -4  -3 13321.3 706.935  18
  -4  -4   2 20920.1 767.441   6
   4  -4  -2 19536.4 813.023  18
   4  -4  -2 19528.9 862.610  19
  -4  -4   1 4344.70 361.177  21
  -4  -4   1 4643.82 320.467   6
   4  -4  -1 3970.53 370.101  19
   4  -4  -1 4326.53 327.643  18
  -4  -4   0 22399.5 858.216  21
  -4  -4   0 22847.7 747.495   6
  -4  -4  -1 10378.0 471.843   6
  -4  -4  -1 9801.93 551.778  21
   4  -4   1 8969.05 490.187  19
   4  -4   1 9489.98 482.129   1
  -4  -4  -2 12001.3 633.171  21
   4  -4   2 12752.6 506.851  19
   4  -4   2 11740.8 558.593   1
  -4  -4  -3 9048.38 565.911  21
   4  -4   3 9001.05 493.418   1
  -4  -4  -4 7238.11 536.792  21
  -4  -4  -5 14182.4 800.569  21
  -4  -4  -5 12628.8 772.629  20
   4  -4   5 14434.9 750.182   4
  -4  -4  -6 7509.70 226.550  13
  -4  -4  -7 5307.79 188.820  13
  -4  -4  -8 11040.2 303.222  13
  -4  -4  -9 870.127 71.5821  13
   4  -4  11 216.677 26.9785  11
   4  -3 -11 252.465 34.3861  23
  -4  -3  10 118.101 36.3618  22
   4  -3 -10 104.243 33.4317  23
  -4  -3   9 47.6540 34.4082  22
   4  -3  -9 99.6911 37.3944  23
  -4  -3   9 124.070 33.8231  14
  -4  -3   8 2119.83 105.859  14
  -4  -3   8 2284.41 124.333  22
  -4  -3   7 16051.0 379.191  14
  -4  -3   7 16498.1 406.380  22
  -4  -3   6 1320.23 234.203   6
   4  -3  -6 1556.97 279.793  18
  -4  -3   6 1804.73 102.957  22
  -4  -3   5 4498.60 405.694   6
   4  -3  -5 4430.17 422.843  19
   4  -3  -5 3790.81 428.040  18
  -4  -3   5 5369.16 426.772   2
  -4  -3   4 18849.2 807.873   6
   4  -3  -4 18667.7 854.129  19
   4  -3  -4 19157.6 913.322  18
  -4  -3   4 21547.5 810.299   2
  -4  -3   3 50935.2 1404.00   6
   4  -3  -3 50585.2 1471.08  19
   4  -3  -3 48016.1 1480.74  18
  -4  -3   2 2192.65 229.740   6
   4  -3  -2 2239.83 254.186  19
   4  -3  -2 1986.29 245.663  18
  -4  -3   1 84647.0 1947.43   6
   4  -3  -1 87710.7 2051.91  19
   4  -3  -1 85120.0 1959.38  18
  -4  -3   0 37114.9 1050.70   6
   4  -3   0 37297.3 1157.88  19
   4  -3   0 38744.0 1041.27  18
  -4  -3   0 34868.0 1092.87  21
  -4  -3  -1 7478.15 445.687  21
  -4  -3  -1 8082.59 414.492   6
   4  -3   1 7667.89 460.403  19
   4  -3   1 7262.84 379.602   1
  -4  -3  -2 15438.7 689.130  21
   4  -3   2 15798.1 621.137  19
   4  -3   2 17038.6 620.637   1
  -4  -3  -3 12160.7 628.351  21
  -4  -3  -3 11560.6 629.274  20
   4  -3   3 12268.0 537.344   1
   4  -3   4 1671.95 230.766   4
  -4  -3  -4 2007.31 260.431  21
  -4  -3  -4 1625.63 246.836  20
  -4  -3  -5 4558.97 424.915  21
  -4  -3  -5 4466.85 437.769  20
   4  -3   5 4034.09 376.494   4
  -4  -3  -6 791.908 188.141  21
  -4  -3  -7 12294.9 321.965  13
  -4  -3  -8 2590.52 127.244  13
  -4  -3  -9 852.293 71.1616  13
  -4  -3 -10 615.307 55.5772  13
   4  -3  11 259.310 29.5046  11
   4  -2 -11 1395.85 75.0233  23
  -4  -2  10 129.756 37.3136  22
   4  -2 -10 147.006 36.4409  23
  -4  -2  10 160.977 27.7740  14
  -4  -2   9 1521.21 99.2101  22
  -4  -2   9 1426.86 81.4721  14
  -4  -2   8 23713.2 506.004  14
  -4  -2   8 23924.7 540.081  22
  -4  -2   7 448.882 55.4716  22
  -4  -2   7 412.551 47.3073  14
  -4  -2   6 5056.84 464.381   6
  -4  -2   6 5669.47 478.384   2
   4  -2  -6 4740.16 489.225  18
  -4  -2   5 5680.15 458.455   6
   4  -2  -5 5910.57 444.585  19
  -4  -2   5 5649.69 442.854   2
   4  -2  -5 5528.99 495.904  18
  -4  -2   4 6078.56 439.521   6
   4  -2  -4 6641.57 436.117  19
  -4  -2   4 7476.04 458.230   2
   4  -2  -4 6412.80 476.289  18
  -4  -2   3 40970.5 1211.02   6
  -4  -2   3 40620.0 1124.94   2
   4  -2  -3 39989.7 1216.42  18
  -4  -2   2 2900.97 211.632   2
  -4  -2   2 3028.24 272.149   6
   4  -2  -2 3029.65 260.382  18
  -4  -2   1 26097.9 855.914   6
   4  -2  -1 25075.0 768.287  18
  -4  -2   0 19652.6 716.954  21
  -4  -2   0 19438.4 702.497   6
   4  -2   0 20323.5 620.333  18
  -4  -2  -1 65260.0 1588.53  21
  -4  -2  -1 65041.5 1551.65   6
   4  -2   1 64487.2 1428.90   1
   4  -2   1 69618.5 1604.62  19
  -4  -2  -2 19068.3 687.225   6
   4  -2   2 18380.4 585.413   1
   4  -2   2 17779.9 674.957  19
  -4  -2  -3 9089.16 505.310  21
  -4  -2  -3 8866.27 521.816  20
  -4  -2  -4 2768.74 291.651  21
  -4  -2  -4 3151.23 327.524  20
   4  -2   4 3798.39 324.693   4
  -4  -2  -5 380.710 122.421  21
  -4  -2  -5 511.488 154.387  20
   4  -2   5 436.226 126.405   4
  -4  -2  -6 5065.25 481.721  20
   4  -2   6 5825.68 460.286   5
   4  -2   6 5049.47 422.278   4
  -4  -2  -7 5357.32 186.030  13
  -4  -2  -8 344.693 49.5957  13
  -4  -2  -9 4152.41 162.495  13
  -4  -2 -10 186.276 34.7482  13
   4  -2  11 11.6509 18.0021  11
  -4  -2 -11 2.68936 19.2981  13
   4  -1 -12 1826.17 69.7091  23
   4  -1 -11 72.2708 28.2584  23
  -4  -1  10 402.985 39.7656  14
  -4  -1   9 15667.0 389.140  22
  -4  -1   9 15029.6 349.482  14
  -4  -1   8 10830.2 280.025  14
  -4  -1   8 10927.8 309.699  22
  -4  -1   7 3755.13 156.953  22
  -4  -1   7 3593.97 137.973  14
  -4  -1   6 15150.0 803.996   2
  -4  -1   6 15421.9 838.107   6
   4  -1  -6 14482.2 848.715  18
  -4  -1   5 19533.7 886.870   6
  -4  -1   5 19705.7 860.702   2
   4  -1  -5 18804.8 876.945  18
  -4  -1   4 56512.8 1502.07   2
  -4  -1   4 55555.7 1551.13   6
   4  -1  -4 52262.7 1478.75  18
   4  -1  -4 53803.4 1345.59  17
  -4  -1   3 33460.0 970.315   2
  -4  -1   3 30676.3 1023.60   6
   4  -1  -3 30987.0 956.352  18
  -4  -1   2 14727.5 530.369   2
  -4  -1   2 14197.9 619.426   6
   4  -1  -2 14787.4 552.147  18
  -4  -1   1 108586. 2294.57   6
   4  -1  -1 103574. 2103.46  18
  -4  -1   1 104832. 2041.39   2
  -4  -1   0 1134.22 148.207  21
  -4  -1   0 1243.30 163.856   6
   4  -1   0 1492.90 134.684  18
  -4  -1  -1 9155.43 434.527  21
  -4  -1  -1 9531.17 453.786   3
  -4  -1  -1 8757.60 434.108   6
   4  -1   1 8920.82 333.036  18
  -4  -1  -2 3114.72 256.702   6
  -4  -1  -2 2973.63 244.259  21
  -4  -1  -2 3191.74 270.674   3
  -4  -1  -2 3106.87 263.518  20
   4  -1   2 2992.18 229.022  19
   4  -1   3 18850.3 705.699   4
  -4  -1  -3 19283.2 757.614   3
  -4  -1  -3 17595.8 686.685  21
  -4  -1  -3 17999.3 742.284  20
  -4  -1  -4 16671.3 701.196  21
  -4  -1  -4 15095.5 725.229  20
   4  -1   4 16063.8 681.152   4
  -4  -1  -5 10757.2 652.978  20
   4  -1   5 11628.9 612.646   5
   4  -1   5 10552.3 566.843   4
   4  -1   6 1092.85 195.501   4
  -4  -1  -6 737.332 177.697  20
   4  -1   6 1041.63 191.035   5
  -4  -1  -7 317.477 40.7855  12
  -4  -1  -7 339.859 45.0651  13
  -4  -1  -8 243.468 38.1028  12
  -4  -1  -8 231.550 42.3183  13
  -4  -1  -9 844.907 71.2411  13
   4  -1  10 1236.08 72.7302  11
  -4  -1 -10 1344.79 81.3532  13
   4  -1  11 528.274 40.8737  11
  -4  -1 -11 473.017 42.8604  13
   4   0 -12 236.458 26.3835  23
  -4   0  11 667.436 48.8839   9
   4   0 -11 780.666 56.9723  23
  -4   0  10 418.114 40.1844  14
  -4   0   9 1039.26 69.3452  14
  -4   0   9 1041.59 82.1783  22
  -4   0   8 9380.17 277.741  22
  -4   0   8 9315.10 250.370  14
  -4   0   7 2080.90 112.206  22
  -4   0   7 2019.42 99.3221  14
  -4   0   6 9634.79 626.383   2
  -4   0   6 10286.3 680.706   6
   4   0  -6 9621.51 647.252  18
  -4   0   5 10634.2 610.001   2
  -4   0   5 10551.0 640.256   6
   4   0  -5 10620.8 593.850  18
   4   0  -5 10483.0 539.212  17
  -4   0   4 3470.37 307.182   2
  -4   0   4 3546.80 332.377   6
   4   0  -4 3820.42 306.410  18
   4   0  -4 3513.52 267.237  17
  -4   0   3 60918.9 1533.70   2
  -4   0   3 60442.9 1617.79   6
   4   0  -3 66344.9 1523.95  18
   4   0  -3 64313.1 1407.14  17
  -4   0   2 7099.79 362.116   2
  -4   0   2 6722.51 409.854   6
   4   0  -2 7072.26 301.337  17
  -4   0   1 226141. 4218.68   3
  -4   0   1 233164. 4412.01   6
   4   0  -1 233218. 4076.60  17
  -4   0   1 239191. 4207.05   2
  -4   0   0 8425.03 395.146   3
  -4   0   0 8158.71 426.076   6
   4   0   0 7851.38 277.163  17
  -4   0   0 7801.99 323.375   2
  -4   0  -1 1100.16 146.758   6
  -4   0  -1 1225.27 141.200  21
  -4   0  -1 1134.96 151.759   3
   4   0   2 527.562 96.5904   4
  -4   0  -2 467.344 91.6700  21
  -4   0  -2 570.620 107.604  20
  -4   0  -2 491.632 103.013   6
  -4   0  -2 533.126 111.993   3
  -4   0  -3 61218.8 1557.97  20
   4   0   3 60155.6 1487.90   5
  -4   0  -3 59344.3 1572.08   3
   4   0   3 60571.1 1465.35   4
  -4   0  -4 12378.4 625.767   3
  -4   0  -4 12115.3 622.593  20
   4   0   4 11309.3 562.024   5
   4   0   4 11015.6 530.612   4
  -4   0  -5 4148.07 375.295   3
  -4   0  -5 3966.08 380.458  20
   4   0   5 4046.58 347.215   5
   4   0   5 4176.16 341.713   4
  -4   0  -6 2380.38 326.415  20
   4   0   6 2598.19 302.270   5
   4   0   6 2453.32 283.498   4
  -4   0  -7 6474.15 204.856  13
  -4   0  -7 6665.12 204.147  12
  -4   0  -8 558.278 58.4969  13
  -4   0  -8 625.130 57.6183  12
  -4   0  -9 2895.12 131.214  13
  -4   0  -9 2820.73 119.951  12
   4   0  10 4008.57 134.867  11
  -4   0 -10 3965.56 147.130  13
  -4   0 -10 3661.12 127.467  12
  -4   0 -11 8.65625 18.8401  13
   4   1 -11 64.6359 26.0056  23
  -4   1  11 27.3892 20.3453   9
  -4   1  10 374.966 45.2191   9
  -4   1  10 435.182 40.6092  14
  -4   1   9 14581.5 335.449  14
  -4   1   8 10913.2 278.599  14
  -4   1   7 3637.99 153.508  22
  -4   1   7 3725.10 139.147  14
  -4   1   6 15493.6 812.180   2
  -4   1   6 16751.2 893.396   6
   4   1  -6 16335.1 806.192  18
   4   1  -6 15706.6 757.973  17
  -4   1   5 19307.5 852.262   2
  -4   1   5 20510.6 920.278   6
   4   1  -5 19083.2 785.327  18
   4   1  -5 19184.4 764.338  17
  -4   1   4 51232.9 1466.78   2
  -4   1   4 56500.8 1573.26   6
   4   1  -4 55080.0 1412.66  18
   4   1  -4 53315.4 1346.57  17
  -4   1   3 30626.3 960.594   2
  -4   1   3 30707.2 1017.52   6
   4   1  -3 30837.6 856.531  17
  -4   1   2 15073.5 631.442   6
   4   1  -2 13917.3 490.677  17
  -4   1   2 13945.2 552.954   2
  -4   1   1 104465. 2112.05   3
  -4   1   1 106071. 2268.33   6
   4   1  -1 105319. 2036.11  17
  -4   1   1 103903. 2130.89   2
  -4   1   0 1311.48 164.885   6
  -4   1   0 1374.23 156.776   3
   4   1   0 1383.47 127.418  17
   4   1   0 1483.33 124.209   5
  -4   1   0 1336.28 141.640   2
  -4   1  -1 9227.24 439.995   6
  -4   1  -1 7824.71 352.708  20
  -4   1  -1 9183.97 448.406   3
   4   1   1 9592.99 371.646  17
   4   1   1 9289.85 380.627   5
  -4   1  -1 8429.36 356.614   2
   4   1   1 9120.09 364.586   4
  -4   1  -2 3124.83 236.771  20
  -4   1  -2 3113.86 271.634   3
   4   1   2 3215.86 226.552   4
  -4   1  -2 3102.28 256.435   6
   4   1   2 3284.82 241.740   5
  -4   1  -3 18353.6 706.624  20
  -4   1  -3 18802.5 756.821   3
   4   1   3 18895.8 693.687   5
   4   1   3 18101.8 640.302   4
  -4   1  -4 15746.0 710.189  20
  -4   1  -4 15873.5 729.075   3
   4   1   4 16363.8 686.655   5
   4   1   4 15887.8 644.492   4
  -4   1  -5 11177.8 633.472   3
  -4   1  -5 11841.0 659.817  20
   4   1   5 11762.0 612.671   5
   4   1   5 10985.9 569.133   4
   4   1   6 1077.83 191.833   4
  -4   1  -6 1081.85 213.895  20
  -4   1  -6 1050.65 198.660   3
   4   1   6 812.375 165.916   5
  -4   1  -7 306.598 43.3090  12
  -4   1  -7 298.874 41.4919  13
  -4   1  -8 293.795 43.6180  12
  -4   1  -8 199.921 35.4584   8
  -4   1  -8 287.405 43.6808  13
  -4   1  -9 738.428 63.3523   8
  -4   1  -9 883.955 71.1903  13
  -4   1  -9 801.054 64.5903  12
  -4   1 -10 1257.48 78.8916  13
  -4   1 -10 1295.36 73.2152  12
  -4   1 -11 445.005 42.1201  13
  -4   2  11 1511.90 70.7049   9
  -4   2  10 181.817 33.1023  11
  -4   2  10 120.311 30.0101   9
  -4   2  10 133.989 26.5115  14
  -4   2   9 1523.43 90.3025  11
  -4   2   9 1488.55 87.6401   9
  -4   2   9 1453.94 80.4852  14
  -4   2   8 24131.0 519.303  11
  -4   2   8 23697.2 499.750  14
  -4   2   7 464.939 48.8130  14
  -4   2   6 5113.84 454.896   2
  -4   2   6 5468.51 495.185   6
   4   2  -6 5116.86 420.333  18
   4   2  -6 4877.27 409.010  17
  -4   2   5 5525.01 443.959   2
  -4   2   5 5932.26 475.103   6
   4   2  -5 5784.73 404.092  18
   4   2  -5 5900.54 404.850  17
  -4   2   4 6745.79 447.794   2
  -4   2   4 6462.11 458.378   6
   4   2  -4 6988.31 401.092  17
  -4   2   3 40380.0 1210.98   6
   4   2  -3 40806.5 1077.58  17
  -4   2   3 38768.2 1152.69   2
  -4   2   2 2855.07 263.731   6
   4   2  -2 3291.72 234.074  17
  -4   2   2 2948.95 249.369   2
  -4   2   1 23390.5 796.988   6
  -4   2   1 23852.1 722.188   3
   4   2  -1 24220.9 701.934  17
  -4   2   1 22715.0 745.525   2
  -4   2   0 18727.9 679.137   6
  -4   2   0 19270.7 670.475   3
   4   2   0 20319.4 628.910  17
   4   2   0 19549.3 538.630   5
  -4   2   0 19106.3 639.849   2
  -4   2  -1 65808.0 1536.88   6
  -4   2  -1 63500.7 1567.49   3
   4   2   1 65300.7 1448.92  17
   4   2   1 66697.3 1414.63   5
  -4   2  -1 63997.6 1455.28   2
   4   2   1 64164.4 1339.40   4
  -4   2  -2 19555.1 702.631   6
  -4   2  -2 19622.5 750.403   3
   4   2   2 18948.5 641.934   5
   4   2   2 18235.4 587.790   4
  -4   2  -3 9350.53 469.724  20
  -4   2  -3 9442.27 529.940   3
   4   2   3 9595.95 470.537   5
   4   2   3 9561.59 437.802   4
  -4   2  -4 3327.61 306.780  20
  -4   2  -4 3275.74 324.040   3
   4   2   4 3200.29 288.727   5
   4   2   4 2976.36 261.852   4
   4   2   5 404.052 112.926   4
  -4   2  -5 609.595 149.432  20
  -4   2  -5 509.172 139.520   3
   4   2   5 253.385 107.642   5
  -4   2  -6 5624.45 466.358   3
  -4   2  -6 4563.14 435.946  20
   4   2   6 5365.05 435.020   5
   4   2   6 5140.59 414.074   4
  -4   2  -6 5196.58 175.577  12
  -4   2  -7 4869.95 162.650  16
  -4   2  -7 5042.63 172.491  13
  -4   2  -7 4999.25 176.084  12
  -4   2  -8 365.697 49.4601  12
  -4   2  -8 332.620 45.4283   8
  -4   2  -8 397.076 48.4351  13
  -4   2  -9 3989.10 151.836   8
  -4   2  -9 4066.09 154.649  13
  -4   2  -9 4051.98 152.914  12
  -4   2 -10 225.508 34.4081  12
  -4   2 -10 269.262 38.0955   8
  -4   2 -10 271.351 41.0430  13
  -4   2 -11 11.1831 15.8035  12
  -4   2 -11 37.7453 19.5596  13
  -4   3  11 335.153 33.5943  11
  -4   3  11 361.029 33.7759   9
  -4   3  10 41.8099 23.1389  11
  -4   3  10 69.6552 25.5412   9
  -4   3  10 64.2406 20.1637  14
  -4   3   9 22.4519 25.8026  11
  -4   3   9 11.9332 23.7723   9
  -4   3   9 74.2073 25.2353  14
  -4   3   8 2163.01 110.990  11
  -4   3   8 2262.48 111.284   9
  -4   3   8 2185.12 101.756  14
  -4   3   7 16133.5 387.709  11
  -4   3   7 16813.8 374.377  14
  -4   3   6 2162.74 302.525   6
   4   3  -6 1708.66 233.223  18
   4   3  -6 1356.46 213.647  17
  -4   3   6 1492.58 244.853   2
  -4   3   6 1703.71 88.2891  14
  -4   3   5 4958.60 422.759   2
  -4   3   5 4768.18 424.092   6
   4   3  -5 4620.76 369.701  17
  -4   3   4 18414.2 804.609   6
   4   3  -4 19034.3 736.293  17
  -4   3   4 18966.3 810.365   2
  -4   3   3 51748.8 1420.00   6
   4   3  -3 49596.9 1311.69  17
  -4   3   3 51148.0 1408.19   2
  -4   3   2 1795.29 204.023   6
   4   3  -2 2034.79 199.874  17
  -4   3   2 1905.96 211.114   2
  -4   3   1 84680.2 1917.22   6
  -4   3   1 84163.5 1846.45   3
   4   3  -1 83675.5 1844.12  17
  -4   3   1 85470.3 1904.95   2
  -4   3   0 38138.3 1051.74   6
  -4   3   0 36341.0 1055.25   3
   4   3   0 38228.4 1019.29  17
  -4   3   0 36941.0 1035.63   2
  -4   3  -1 7390.07 395.494   6
  -4   3  -1 7231.77 426.933   3
   4   3   1 7669.03 385.175  17
   4   3   1 7759.70 348.094   5
  -4   3  -1 7352.75 387.944   2
  -4   3  -2 16606.6 707.741   3
   4   3   2 15824.0 588.290   5
  -4   3  -3 13361.3 657.034   3
   4   3   3 12108.4 553.340   5
   4   3   3 12558.6 511.410   4
  -4   3  -4 1827.20 251.747   3
   4   3   4 1664.72 218.450   5
   4   3   4 1456.82 187.465   4
  -4   3  -5 3964.01 370.426  20
  -4   3  -5 4121.70 395.464   3
   4   3   5 3780.93 346.025   5
   4   3   5 4106.80 349.988   4
   4   3   6 929.304 181.989   4
  -4   3  -6 942.214 195.199  20
  -4   3  -6 858.311 64.1172  16
  -4   3  -6 986.142 71.5137  12
  -4   3  -7 12051.7 300.552  16
  -4   3  -7 11855.9 302.838   8
  -4   3  -7 12055.8 306.042  13
  -4   3  -7 11970.9 313.910  12
  -4   3  -8 2562.25 119.348   8
  -4   3  -8 2628.07 120.890  13
  -4   3  -8 2555.48 122.162  12
  -4   3  -9 876.358 68.4443   8
  -4   3  -9 910.672 70.1099  13
  -4   3  -9 854.762 69.0397  12
  -4   3 -10 546.453 49.7671   8
  -4   3 -10 593.711 53.4034  13
  -4   3 -10 658.653 54.9018  12
  -4   3 -11 266.529 30.5777  12
  -4   3 -11 276.406 32.0334  13
  -4   4  11 803.712 48.4521  11
  -4   4  11 879.217 48.5491   9
  -4   4  10 641.165 54.1521  11
  -4   4  10 632.992 50.0386   9
  -4   4   9 7701.53 229.267  11
  -4   4   9 7786.27 221.327   9
  -4   4   9 7805.41 208.363  14
  -4   4   8 8860.44 257.504  11
  -4   4   8 8430.45 245.455   9
  -4   4   7 6930.80 218.048  11
  -4   4   7 6533.71 206.624   9
  -4   4   7 6927.74 201.623  14
  -4   4   6 8682.48 248.004  11
  -4   4   6 8555.80 239.891   9
  -4   4   6 9127.56 238.503  14
  -4   4   5 5145.57 432.828   6
   4   4  -5 5136.21 401.681  17
  -4   4   5 4928.47 434.876   2
  -4   4   4 3962.93 350.492   6
   4   4  -4 3410.93 309.161  17
  -4   4   4 3948.65 363.536   2
  -4   4   3 15177.7 667.087   6
   4   4  -3 14515.0 635.240  17
  -4   4   3 15135.0 695.291   2
  -4   4   2 20359.9 752.149   6
   4   4  -2 20137.0 741.147  17
  -4   4   2 21545.6 807.625   2
  -4   4   1 4806.18 324.002   6
  -4   4   1 5186.88 340.359   3
   4   4  -1 5057.29 334.311  17
  -4   4   1 4572.77 338.171   2
  -4   4   0 22920.8 751.407   6
  -4   4   0 22781.5 818.749   3
   4   4   0 22142.4 769.741  17
  -4   4   0 22490.2 794.550   2
  -4   4  -1 10470.0 474.210   6
  -4   4  -1 10280.2 538.205   3
   4   4   1 8841.04 450.633  17
   4   4   1 9288.43 405.582   5
  -4   4  -1 9438.97 478.299   2
  -4   4  -2 12216.9 624.692   3
   4   4   2 11853.9 508.995   5
  -4   4  -3 9402.02 563.705   3
   4   4   3 8780.17 470.724   5
  -4   4  -4 7161.12 517.314   3
   4   4   4 7073.15 456.290   5
  -4   4  -5 13730.9 757.570   3
   4   4   5 13610.4 692.850   5
   4   4   5 13822.9 671.081   4
  -4   4  -6 7753.12 226.499  16
  -4   4  -6 7876.66 233.576  12
  -4   4  -7 5093.83 174.706  16
  -4   4  -7 5181.17 176.906   8
  -4   4  -7 5401.33 187.008  12
  -4   4  -8 10470.8 272.114  16
  -4   4  -8 10599.1 283.770   8
  -4   4  -8 10881.3 284.739  13
  -4   4  -8 10626.2 288.451  12
  -4   4  -9 737.546 61.4193   8
  -4   4  -9 716.659 60.9027  13
  -4   4  -9 791.111 66.2948  12
  -4   4 -10 276.448 37.9445  12
  -4   4 -10 246.212 34.8733   8
  -4   4 -10 291.617 37.5827  13
  -4   4 -11 215.118 26.9492  12
  -4   4 -11 229.698 27.0432  13
  -4   5  11 672.560 41.7012  11
  -4   5  11 716.037 40.0203   9
  -4   5  10 1769.50 86.1041  11
  -4   5  10 1831.68 82.0918   9
  -4   5   9 2532.00 117.176  11
  -4   5   9 2445.51 108.762   9
  -4   5   8 2201.77 114.948  11
  -4   5   8 2327.49 110.798   9
  -4   5   8 2327.31 102.534  14
  -4   5   7 6264.69 208.856  11
  -4   5   7 6219.76 197.838   9
  -4   5   7 6524.32 193.291  14
  -4   5   6 4932.46 177.160  11
  -4   5   6 4776.60 166.554   9
  -4   5   6 5048.87 164.221  14
  -4   5   5 6282.29 198.835  11
   4   5  -5 5579.41 434.901  17
  -4   5   5 5963.42 185.916   9
  -4   5   5 6583.69 188.327  14
   4   5  -4 821.772 166.465  17
  -4   5   4 907.080 182.808   2
   4   5  -3 4331.24 350.211  17
  -4   5   3 3107.88 320.515   2
   4   5  -2 1832.29 220.830  17
  -4   5   2 2200.94 250.090   2
  -4   5   1 26098.2 899.573   3
   4   5  -1 26252.9 903.042  17
  -4   5   1 25513.4 922.788   2
  -4   5   0 8922.08 507.543   3
   4   5   0 8407.69 467.841  17
  -4   5   0 8166.63 475.717   2
  -4   5  -1 17884.0 770.524   3
   4   5   1 15735.3 666.248  17
  -4   5  -2 4423.71 387.314   3
   4   5   2 4243.70 307.029   5
  -4   5  -3 7446.23 525.955   3
   4   5   3 7408.62 446.037   5
  -4   5  -4 13044.0 738.977   3
   4   5   4 12842.2 645.312   5
  -4   5  -5 11607.3 295.991  16
  -4   5  -5 11551.4 298.761  12
  -4   5  -6 1074.22 76.4966  16
  -4   5  -6 1161.43 76.3360   8
  -4   5  -6 1224.30 83.3528  12
  -4   5  -7 11965.4 308.736  16
  -4   5  -7 12171.0 311.460   8
  -4   5  -7 12078.6 317.831  12
  -4   5  -8 653.605 56.7014  16
  -4   5  -8 617.167 58.1601   8
  -4   5  -8 528.754 54.6310  13
  -4   5  -8 620.275 60.6770  12
  -4   5  -9 413.633 50.2063  12
  -4   5  -9 455.243 48.5819   8
  -4   5  -9 517.513 51.7932  13
  -4   5 -10 241.145 34.7531  12
  -4   5 -10 217.502 31.8091   8
  -4   5 -10 261.873 32.6376  13
  -4   5 -11 204.125 24.8079  12
  -4   6  10 1003.61 60.6314  11
  -4   6  10 1110.56 58.9215   9
  -4   6   9 104.626 29.4917  11
  -4   6   9 96.8608 27.0291   9
  -4   6   8 740.054 65.5592  11
  -4   6   8 737.703 60.3672   9
  -4   6   7 801.139 69.5509  11
  -4   6   7 878.798 68.0071   9
  -4   6   7 957.299 67.1479  14
  -4   6   6 1119.00 81.0227  11
  -4   6   6 1147.58 76.6644   9
  -4   6   6 1219.45 75.4225  14
  -4   6   5 1724.29 98.6510  11
  -4   6   5 1748.68 93.2478   9
  -4   6   5 1784.05 90.0938  14
  -4   6   4 12047.1 306.478  11
   4   6  -4 10203.0 611.019  17
  -4   6   4 12109.2 293.249   9
  -4   6   4 12372.6 287.000  14
  -4   6   4 10239.1 648.465   2
   4   6  -3 2267.95 271.843  17
  -4   6   3 2145.12 281.948   2
   4   6  -2 3144.85 313.359  17
  -4   6   2 3349.61 331.514   2
   4   6  -1 653.164 136.892  17
  -4   6   1 618.489 138.696   2
  -4   6   1 618.053 136.305   3
  -4   6   0 13860.4 689.750   3
   4   6   0 14014.4 659.917  17
  -4   6   0 14341.1 685.834   2
  -4   6  -1 7902.19 523.890   3
   4   6   1 6960.11 460.126  17
  -4   6  -2 12583.5 697.408   3
   4   6   2 11917.4 564.716   5
   4   6   2 12123.8 634.779  17
  -4   6  -3 4364.13 420.472   3
   4   6   3 4442.72 357.683   5
   4   6   4 7048.04 486.476   5
  -4   6  -4 7844.14 226.502  16
  -4   6  -5 7077.33 219.492  16
  -4   6  -5 7338.70 216.063   8
  -4   6  -5 7263.59 220.978  12
  -4   6  -6 23312.4 517.038  16
  -4   6  -6 24331.0 515.421   8
  -4   6  -6 23994.1 523.563  12
  -4   6  -7 798.995 67.1647  16
  -4   6  -7 722.093 64.8009   8
  -4   6  -7 701.509 66.2730  12
  -4   6  -8 609.445 55.5928  16
  -4   6  -8 603.316 57.3614   8
  -4   6  -8 601.094 55.5238  13
  -4   6  -8 633.188 60.5127  12
  -4   6  -9 76.7064 27.9855  12
  -4   6  -9 72.4931 20.9662  16
  -4   6  -9 85.1258 26.9488   8
  -4   6  -9 86.8404 26.8268  13
  -4   6 -10 84.3703 23.8666  12
  -4   6 -10 67.6549 20.3843   8
  -4   6 -10 71.0190 20.0769  13
  -4   7  10 85.4847 20.9140  11
  -4   7  10 86.7215 19.0368   9
  -4   7   9 260.863 36.5338  11
  -4   7   9 286.505 35.3747   9
  -4   7   8 478.612 52.3687  11
  -4   7   8 472.934 48.7235   9
  -4   7   7 4321.73 164.808  11
  -4   7   7 4155.82 152.778   9
  -4   7   6 11917.5 317.991  11
  -4   7   6 11581.2 298.670   9
  -4   7   5 1819.11 104.997  11
  -4   7   5 1958.35 99.3777   9
  -4   7   4 16309.7 389.452  11
  -4   7   4 16148.6 372.431   9
  -4   7   3 4065.02 154.185  11
  -4   7   3 4110.10 144.584   9
   4   7  -2 1885.27 248.242  17
  -4   7   2 1598.27 242.223   2
  -4   7   1 23112.5 950.154   3
   4   7  -1 22037.7 911.987  17
  -4   7   1 22824.2 945.982   2
  -4   7   0 12489.7 689.245   3
   4   7   0 11407.6 630.691  17
  -4   7  -1 3270.44 358.049   3
   4   7   1 3216.89 331.209  17
  -4   7  -2 12782.3 740.932   3
   4   7   2 11304.0 659.258  17
  -4   7  -3 5679.79 184.674  16
  -4   7  -3 5517.34 170.600   7
  -4   7  -4 12358.7 321.526  16
  -4   7  -4 13170.7 309.834   7
  -4   7  -5 6748.36 212.091  16
  -4   7  -5 6362.40 193.669   7
  -4   7  -5 6506.19 205.929  12
  -4   7  -6 872.792 71.9020  16
  -4   7  -6 774.602 66.6731   8
  -4   7  -6 818.030 69.5833  12
  -4   7  -7 3142.90 133.055  16
  -4   7  -7 3108.90 132.163   8
  -4   7  -7 3043.82 134.474  12
  -4   7  -8 413.215 47.7775  12
  -4   7  -8 373.909 44.2551  16
  -4   7  -8 451.173 47.6515   8
  -4   7  -8 477.726 47.0957  13
  -4   7  -9 904.704 53.8120  16
  -4   7  -9 946.542 59.9771   8
  -4   7  -9 932.862 57.9276  13
  -4   7  -9 916.885 61.3036  12
  -4   7 -10 2305.15 79.6302   8
  -4   7 -10 2172.86 81.0798  12
  -4   8   9 313.162 36.4381  11
  -4   8   9 365.229 34.9530   9
  -4   8   8 638.314 55.7913  11
  -4   8   8 616.137 51.2933   9
  -4   8   7 1747.90 98.2174  11
  -4   8   7 1833.83 94.2730   9
  -4   8   6 3271.66 142.710  11
  -4   8   6 3297.16 133.705   9
  -4   8   5 12153.9 325.550  11
  -4   8   5 12494.4 310.903   9
  -4   8   4 1972.41 111.902  11
  -4   8   4 2255.20 107.535   9
  -4   8   3 2087.21 110.797  11
  -4   8   3 2226.82 105.271   9
  -4   8   2 3898.79 153.944  11
  -4   8   2 4124.08 148.258   9
  -4   8   1 2591.60 121.760  11
  -4   8   1 2934.97 119.841   9
  -4   8   0 11442.8 284.380   7
  -4   8  -1 3533.70 136.247  16
  -4   8  -1 3470.43 132.053   7
  -4   8  -2 3715.65 145.714  16
  -4   8  -2 3887.03 140.555   7
  -4   8  -3 17310.1 404.131  16
  -4   8  -3 17030.4 386.448   7
  -4   8  -4 129.774 31.9714   7
  -4   8  -4 210.190 43.8025  16
  -4   8  -5 8636.53 251.085  16
  -4   8  -5 8343.36 232.861   7
  -4   8  -6 1078.35 78.4683  16
  -4   8  -6 1220.71 80.5239   8
  -4   8  -6 1123.63 75.7411  12
  -4   8  -7 1030.27 73.2677  16
  -4   8  -7 960.161 68.3630   8
  -4   8  -7 991.945 68.6102  12
  -4   8  -8 38.6599 21.5484  12
  -4   8  -8 32.7958 21.1986  16
  -4   8  -8 34.0213 21.6622   8
  -4   8  -8 107.328 28.0186  13
  -4   8  -9 1553.84 65.6377  16
  -4   8  -9 1706.29 73.0658   8
  -4   8  -9 1629.39 71.8592  12
  -4   9   9 912.587 51.4566  11
  -4   9   9 1080.69 51.7348   9
  -4   9   8 237.052 35.9119  11
  -4   9   8 283.718 34.2066   9
  -4   9   7 1836.23 94.9131  11
  -4   9   7 1881.28 90.7447   9
  -4   9   6 849.255 69.2508  11
  -4   9   6 866.086 66.4174   9
  -4   9   5 5277.52 189.803  11
  -4   9   5 5520.80 181.348   9
  -4   9   4 1328.35 89.8968  11
  -4   9   4 1340.18 83.1952   9
  -4   9   3 42510.0 862.238  11
  -4   9   3 45456.0 852.267   9
  -4   9   2 13852.3 354.192  11
  -4   9   2 14642.6 347.716   9
  -4   9   1 7179.56 214.076   7
  -4   9   0 2900.11 122.919   7
  -4   9  -1 6180.45 192.654   7
  -4   9  -2 23444.2 507.732  16
  -4   9  -2 23111.2 494.999   7
  -4   9  -3 6290.00 205.967  16
  -4   9  -3 6225.51 194.283   7
  -4   9  -4 11916.7 310.376  16
  -4   9  -4 11273.0 289.775   7
  -4   9  -5 2984.07 131.304  16
  -4   9  -5 2687.09 116.734   7
  -4   9  -6 2292.09 110.198  16
  -4   9  -6 2229.51 105.621   8
  -4   9  -7 869.850 62.3314  16
  -4   9  -7 734.400 56.8036   8
  -4   9  -7 729.852 52.2478  12
  -4   9  -8 561.912 44.0252  16
  -4   9  -8 602.298 45.4004   8
  -4   9  -8 520.866 40.3835  12
  -4  10   8 583.477 43.0055  11
  -4  10   7 1275.50 72.4905  11
  -4  10   7 1347.67 70.3468   9
  -4  10   6 2178.39 105.033  11
  -4  10   6 2388.54 103.990   9
  -4  10   5 6987.53 219.796  11
  -4  10   5 7904.18 220.637   9
  -4  10   4 836.391 71.1206  11
  -4  10   4 900.701 68.4618   9
  -4  10   3 564.202 62.6484  11
  -4  10   3 588.074 58.5035   9
  -4  10   2 13798.8 337.415   7
  -4  10   1 4750.12 165.832   7
  -4  10   0 7511.57 220.485   7
  -4  10  -1 2936.97 125.564   7
  -4  10  -2 4714.00 169.110  16
  -4  10  -2 4783.98 165.728   7
  -4  10  -3 13356.9 333.773  16
  -4  10  -3 13118.0 322.109   7
  -4  10  -4 1511.62 91.2577  16
  -4  10  -4 1388.05 82.1993   7
  -4  10  -5 298.096 44.2300  16
  -4  10  -5 358.117 43.4799   8
  -4  10  -5 283.769 37.9993   7
  -4  10  -6 587.963 52.3030  16
  -4  10  -6 587.962 50.0592   8
  -4  10  -7 89.1049 24.0113  16
  -4  10  -7 94.0656 22.2669   8
  -4  10  -8 540.100 36.8617  16
  -4  10  -8 580.535 37.4107   8
  -4  11   7 38.7147 15.5508   7
  -4  11   7 58.6440 19.6707  11
  -4  11   6 2275.46 96.4288  11
   4  11  -6 2297.94 88.0255  16
  -4  11   5 584.495 52.9659  11
  -4  11   4 813.118 66.8364  11
  -4  11   4 857.214 62.3223   7
  -4  11   3 1883.56 95.3283   7
  -4  11   2 2016.15 99.2736   7
  -4  11   1 4151.52 149.434   7
  -4  11   0 1413.16 83.7147   7
  -4  11  -1 820.956 64.2714   7
  -4  11  -2 89.2038 28.8907   7
  -4  11  -2 88.8594 26.3471  16
  -4  11  -3 335.245 41.0532   7
  -4  11  -3 435.869 48.3617  16
  -4  11  -4 207.659 32.6229   7
  -4  11  -4 239.916 38.0842  16
  -4  11  -5 10.2857 21.7874  16
  -4  11  -5 20.4086 19.3065   8
  -4  11  -6 185.268 28.5666  16
  -4  11  -6 165.244 26.2179   8
  -4  11  -7 373.197 32.9008  16
  -4  11  -7 379.432 30.4850   8
  -4  12   6 550.740 36.9260   7
  -4  12   5 1384.29 66.4254   7
  -4  12   4 1218.54 66.7497   7
  -4  12   3 2443.14 100.305   7
  -4  12   2 7524.67 205.010   7
  -4  12   1-10.4186 22.8143   7
  -4  12   0 1444.59 77.9981   7
  -4  12  -1 341.049 40.1307   7
  -4  12  -2 179.336 31.6646   7
  -4  12  -2 152.449 27.6065  16
  -4  12  -3 1694.78 81.0267  16
  -4  12  -3 1638.96 79.3083   7
  -4  12  -4 466.331 41.7332  16
  -4  12  -4 460.390 40.6396   8
  -4  12  -4 509.080 42.1023   7
  -4  12  -5 25.2591 16.7128  16
  -4  12  -5 17.0582 15.0224   8
  -4  12  -6 480.141 34.4105  16
   4  13  -4 1030.40 52.4041  16
  -4  13   4 881.605 47.4364   7
  -4  13   3 326.738 32.5725   7
  -4  13   2 160.991 27.4357   7
  -4  13   1 56.3692 20.9133   7
  -4  13   0 703.828 49.4988   7
  -4  13  -1 1361.36 67.7150   7
  -4  13  -2 418.780 37.1283   7
  -4  13  -3 191.988 25.5201   7
  -4  13  -3 150.434 21.8289  16
  -4  13  -4 134.940 19.6934  16
  -4  14   1 187.826 21.8452   7
  -4  14   0 1120.40 51.2038   7
  -4  14  -1 134.934 19.6061   7
  -5 -13   3 196.667 21.8364  15
  -5 -13   2 861.265 44.2515  15
  -5 -13   1 868.823 42.9174  15
   5 -13   0 848.170 48.3195  22
  -5 -13  -2 939.730 45.2624  10
  -5 -12   5 11.1797 13.5025  15
  -5 -12   4 1157.06 58.7253  15
  -5 -12   3 362.669 36.6818  15
  -5 -12   2 78.7582 22.7019  15
  -5 -12   1 567.284 44.1935  15
  -5 -12   0 152.850 24.6354  10
  -5 -12   0 136.730 23.3406  15
   5 -12   1 161.766 27.7680  22
  -5 -12  -1 163.857 27.4827  10
  -5 -12  -2 390.402 37.3458  10
  -5 -12  -3 1201.65 62.4481  10
  -5 -12  -4 409.659 35.0145  10
  -5 -12  -5 1708.22 64.3440  10
  -5 -11   6 167.227 23.0090  15
  -5 -11   5 1898.41 82.3757  15
  -5 -11   4 621.796 52.1433  15
  -5 -11   3 1173.00 72.5435  15
  -5 -11   2 1929.73 94.5521  15
  -5 -11   1 1939.72 93.8060  15
  -5 -11   0 499.967 45.3198  10
  -5 -11   0 411.975 42.7595  15
  -5 -11  -6 476.253 33.7983  10
  -5 -10   7 245.373 24.6113  15
  -5 -10   7 282.658 28.9185  14
  -5 -10   6 877.235 55.3041  15
  -5 -10   5 406.261 43.8951  15
  -5 -10   4 182.691 36.6601  15
  -5 -10   3 1250.30 81.8369  15
  -5 -10   2 6198.76 198.153  15
  -5 -10   1 6254.23 186.532  10
  -5 -10   1 6208.44 197.557  15
  -5 -10   0 2376.90 108.354  15
  -5 -10  -4 1747.42 94.5182  23
  -5 -10  -6 785.187 50.2710  10
  -5 -10  -7 180.704 20.7851  10
  -5  -9   8 675.305 41.9689  14
  -5  -9   8 661.407 43.4908  22
  -5  -9   7 393.906 34.3844  15
  -5  -9   7 393.743 39.8380  22
  -5  -9   6 1509.18 79.2050  15
  -5  -9   5 788.783 63.1972  15
  -5  -9   4 772.300 67.1731  15
  -5  -9   3 5056.53 182.036  15
  -5  -9   2 8834.68 257.275  15
  -5  -9   1 8382.75 233.129  10
  -5  -9   1 8607.77 246.662  15
  -5  -9   0 9933.46 266.960  15
  -5  -9  -1 1171.74 73.8473  15
  -5  -9  -2 1183.38 87.2251  23
  -5  -9  -3 5736.31 202.517  23
  -5  -9  -7 405.804 34.3834  10
  -5  -8   9 934.105 49.8500  22
   5  -8  -8 1002.06 61.3918  23
  -5  -8   8 1081.91 60.7154  14
  -5  -8   8 1025.59 62.7490  22
  -5  -8   7 1842.10 81.7703  15
   5  -8  -7 1971.08 95.6049  23
  -5  -8   7 2004.84 97.2822  22
  -5  -8   6 1045.69 69.0090  15
  -5  -8   6 1130.19 76.2477  22
  -5  -8   5 2310.51 113.034  15
  -5  -8   4 12059.8 316.850  15
  -5  -8   3 2995.51 138.010  15
  -5  -8   2 12980.1 334.934  15
  -5  -8   1 3577.82 138.393  10
  -5  -8   1 3939.77 153.035  15
  -5  -8   0 1996.78 103.556  15
  -5  -8  -1 18355.2 408.901  15
  -5  -8  -2 2703.70 134.266  23
  -5  -7   9 214.914 29.7765  22
   5  -7  -9 212.053 31.2481  23
  -5  -7   9 210.050 27.2359  14
  -5  -7   8 295.695 40.0121  22
  -5  -7   8 264.277 35.0896  14
   5  -7  -8 268.239 40.1865  23
   5  -7  -7 2714.77 120.380  23
  -5  -7   7 2515.88 119.447  22
  -5  -7   6 6862.91 204.603  15
  -5  -7   6 6962.77 220.935  22
  -5  -7   5 17605.3 411.664  15
  -5  -7   4 5875.36 199.946  15
  -5  -7   3 7227.90 228.332  15
  -5  -7   2 2921.54 117.837  10
  -5  -7   2 3043.60 135.691  15
  -5  -7   1 19650.0 439.264  10
  -5  -7   1 21314.9 461.511  15
  -5  -7   0 10650.0 279.590  15
  -5  -7  -1 6893.59 205.393  15
  -5  -7  -1 7159.51 229.185  23
   5  -6 -10 971.635 54.8689  23
  -5  -6  10 927.947 52.8998  22
  -5  -6   9 603.704 50.4937  22
  -5  -6   9 549.905 44.8575  14
   5  -6  -9 564.040 50.6500  23
  -5  -6   8 1628.68 92.7972  22
  -5  -6   8 1686.27 88.7834  14
   5  -6  -8 1621.14 91.3465  23
   5  -6  -7 2342.65 114.994  23
  -5  -6   7 2333.18 119.091  22
  -5  -6   6 4202.75 153.274  15
   5  -6  -6 4666.60 167.359  23
  -5  -6   6 4541.80 175.016  22
  -5  -6   5 13591.8 338.462  15
  -5  -6   4 6721.19 214.396  15
  -5  -6   3 14061.7 351.291  15
  -5  -6   2 10418.5 281.231  15
   5  -6  -1 1101.08 201.294  19
  -5  -6   1 1069.39 73.9956  15
  -5  -6   0 2786.21 346.089  21
   5  -6   0 3002.16 298.576  19
   5  -6   0 2047.50 274.585   1
  -5  -6  -1 2359.49 318.105  21
   5  -6   1 2094.01 233.592  19
   5  -6   1 1997.54 264.619   1
  -5  -5  10 1279.64 67.3526  22
  -5  -5  10 1306.28 56.4672  14
   5  -5 -10 1244.58 67.3351  23
  -5  -5   9 916.683 59.6231  14
   5  -5  -9 761.459 60.4278  23
  -5  -5   9 811.096 62.8192  22
  -5  -5   8 2161.29 104.799  14
   5  -5  -8 2136.27 108.142  23
  -5  -5   8 2119.90 111.096  22
  -5  -5   7 1114.70 79.5171  14
   5  -5  -7 1301.22 85.4958  23
  -5  -5   7 1235.94 87.7106  22
  -5  -5   6 5352.00 172.912  15
   5  -5  -6 5442.81 184.836  23
  -5  -5   6 5610.52 199.206  22
  -5  -5   5 15920.9 373.012  15
  -5  -5   4 1934.94 101.469  15
   5  -5  -3 10330.6 672.153  19
   5  -5  -3 10876.7 631.444  18
   5  -5  -2 57.9726 90.8116  19
   5  -5  -2-24.8623 80.3956  18
   5  -5  -1 643.726 189.518  19
  -5  -5   0 2073.64 287.265  21
   5  -5   0 2752.82 310.276  19
   5  -5   0 2563.45 280.288   1
  -5  -5  -1 806.279 184.609  21
   5  -5   1 831.460 153.546  19
   5  -5   1 690.864 158.112   1
  -5  -5  -2 7583.82 570.046  21
  -5  -5  -3 3941.26 423.313  21
   5  -4 -11 46.8896 17.3595  23
  -5  -4  10 30.1336 17.3434  14
   5  -4 -10 82.5165 25.3485  23
  -5  -4  10 34.2359 21.6788  22
  -5  -4   9 713.538 56.5379  14
   5  -4  -9 656.941 58.1589  23
  -5  -4   9 692.200 62.9288  22
  -5  -4   8 2383.68 112.365  14
   5  -4  -8 2354.41 116.049  23
  -5  -4   8 2472.24 123.837  22
   5  -4  -7 13111.2 329.053  23
  -5  -4   7 12161.4 319.530  14
  -5  -4   7 12345.2 334.468  22
   5  -4  -6 4068.44 155.958  23
  -5  -4   6 3943.70 162.339  22
  -5  -4   5 6528.34 196.116  15
  -5  -4   4 3372.13 359.997   6
   5  -4  -4 3759.11 435.248  19
   5  -4  -4 3633.65 412.135  18
  -5  -4   3 13626.1 703.552   6
   5  -4  -3 11899.2 753.662  19
   5  -4  -3 12662.5 745.552  18
  -5  -4   2 15237.0 723.116   6
   5  -4  -2 15929.4 852.148  19
   5  -4  -2 15409.3 772.797  18
  -5  -4   1 10960.3 575.523   6
   5  -4  -1 10648.7 673.292  19
  -5  -4   0 22397.6 951.347  21
  -5  -4   0 24471.9 879.989   6
   5  -4   0 22793.7 994.779  19
  -5  -4  -1 3792.78 368.669  21
  -5  -4  -1 3406.55 304.303   6
   5  -4   1 2955.10 313.025  19
  -5  -4  -2 1096.17 205.579  21
  -5  -4  -3 1857.23 283.925  21
   5  -4   4 4292.43 407.796   4
  -5  -4  -4 3194.06 379.496  21
   5  -3 -11 127.865 22.5167  23
  -5  -3  10 1704.19 73.9366  14
   5  -3 -10 1617.72 83.3599  23
   5  -3  -9 2654.62 119.666  23
  -5  -3   9 2608.92 110.126  14
  -5  -3   9 2635.63 122.246  22
  -5  -3   8 2912.51 126.958  14
   5  -3  -8 3041.40 135.891  23
  -5  -3   8 2832.65 136.721  22
  -5  -3   7 5155.62 180.978  14
  -5  -3   7 5246.00 193.027  22
  -5  -3   6 2622.02 121.707  14
  -5  -3   6 2821.34 131.881  22
  -5  -3   5 13073.5 754.899   6
   5  -3  -5 10675.1 739.640  19
  -5  -3   4 16152.8 815.425   6
   5  -3  -4 16568.3 882.293  19
   5  -3  -4 16368.1 902.793  18
  -5  -3   3 8222.80 540.146   6
   5  -3  -3 7258.70 562.780  19
   5  -3  -3 8954.95 615.403  18
  -5  -3   2 38108.2 1246.85   6
   5  -3  -2 39449.6 1348.62  19
   5  -3  -2 36649.3 1271.14  18
   5  -3  -1 48302.5 1508.81  19
   5  -3  -1 49342.0 1407.50  18
  -5  -3   0 12223.4 637.762  21
  -5  -3   0 11798.6 592.392   6
   5  -3   0 12634.0 693.940  19
  -5  -3  -1 4778.14 393.008  21
  -5  -3  -1 4990.62 370.069   6
   5  -3   1 4863.49 412.682  19
  -5  -3  -2 13586.1 696.744  21
   5  -3   2 13073.0 633.421  19
  -5  -3  -3 5616.34 458.908  21
   5  -3   4 4642.40 415.733   4
  -5  -3  -4 4478.74 427.030  21
  -5  -3  -5 626.299 53.2647  12
  -5  -3  -6 6972.65 203.771  12
  -5  -2  11 2575.41 88.6697   9
   5  -2 -11 2359.65 90.3641  23
  -5  -2  10 53.2230 20.4801  14
   5  -2 -10 40.8374 26.5946  23
  -5  -2   9 1108.90 70.8230  14
   5  -2  -9 1174.93 81.1088  23
  -5  -2   9 1127.51 79.9951  22
  -5  -2   8 10437.7 277.508  14
  -5  -2   8 10267.2 294.027  22
  -5  -2   7 7716.80 231.560  14
  -5  -2   7 7739.31 244.641  22
  -5  -2   6 2009.22 104.795  14
  -5  -2   6 2121.42 111.947  22
   5  -2  -5 623.227 175.835  19
  -5  -2   5 687.577 172.702   6
   5  -2  -5 795.425 224.022  18
  -5  -2   4 918.288 195.769   6
   5  -2  -4 1093.53 209.718  19
   5  -2  -4 1040.44 227.692  18
  -5  -2   3 21122.9 898.651   6
   5  -2  -3 20176.3 894.632  18
  -5  -2   2 52414.9 1555.79   6
   5  -2  -2 58414.3 1557.67  18
  -5  -2   1 1392.79 205.948   6
   5  -2  -1 1718.11 208.506  18
  -5  -2   0 8361.97 492.292   6
   5  -2   0 8708.86 516.386  19
  -5  -2  -1 7218.99 452.906   6
   5  -2   1 8344.47 507.179  19
  -5  -2  -1 7441.81 462.548  21
  -5  -2  -2 9082.01 520.886   6
  -5  -2  -2 9260.20 532.224  21
   5  -2   2 9305.42 538.562  19
   5  -2   3 2081.86 257.094   4
  -5  -2  -3 2015.96 252.150  21
  -5  -2  -4 13288.6 750.824  20
   5  -2   4 13246.0 692.181   4
  -5  -2  -5 3589.28 404.484  20
  -5  -2  -5 4147.44 146.970  12
   5  -2   5 4238.59 393.680   4
  -5  -2  -6 560.758 53.2046  12
  -5  -2  -7 10654.9 277.458  12
  -5  -1  11 765.727 48.2246   9
   5  -1 -11 766.240 50.3077  23
  -5  -1  10 926.350 56.2214  14
   5  -1 -10 1015.64 69.1276  23
  -5  -1   9 388.293 45.0659  14
  -5  -1   8 5089.77 173.839  14
  -5  -1   8 4875.77 185.865  22
  -5  -1   7 37903.0 777.124  22
  -5  -1   7 38831.2 760.886  14
  -5  -1   6 4572.44 163.741  14
  -5  -1   6 4608.45 171.167  22
  -5  -1   5 2972.10 333.512   2
  -5  -1   5 2962.96 356.980   6
   5  -1  -5 3138.04 380.022  18
  -5  -1   4 406.522 139.900   6
   5  -1  -4 432.800 152.249  18
  -5  -1   4 445.337 125.568   2
  -5  -1   3 2044.60 268.468   6
   5  -1  -3 1731.28 230.436  18
  -5  -1   2 14199.9 699.181   6
   5  -1  -2 14468.9 620.778  18
  -5  -1   1 12110.1 622.776   6
   5  -1  -1 11930.8 518.355  18
  -5  -1   0 1073.43 173.039   6
   5  -1   0 1108.21 138.800  18
  -5  -1  -1 55917.0 1490.92  21
  -5  -1  -1 61301.0 1575.21   6
  -5  -1  -2 2206.36 245.863   6
  -5  -1  -2 2351.32 243.208  21
   5  -1   2 2155.21 235.271  19
  -5  -1  -3 11975.1 637.509  20
   5  -1   3 11121.4 571.461   4
  -5  -1  -4 1738.43 259.958  20
   5  -1   4 1818.18 239.171   5
   5  -1   4 2272.85 263.833   4
  -5  -1  -5 2857.61 351.030  20
   5  -1   5 2495.94 293.666   5
   5  -1   5 2420.32 286.629   4
  -5  -1  -6 1187.85 74.7300  16
  -5  -1  -6 1075.48 74.4212  12
  -5  -1  -7 1955.11 102.147  12
  -5  -1  -8 1672.96 91.6943  12
  -5  -1  -9 1494.93 78.8446  12
  -5   0  11 3650.77 113.777   9
   5   0 -11 3527.18 116.322  23
  -5   0  10 93.7548 27.6515   9
  -5   0  10 89.1990 22.6698  14
  -5   0   9 284.622 38.5845  14
  -5   0   8 4579.26 161.137  14
  -5   0   7 14726.0 353.770  14
  -5   0   7 14563.7 371.221  22
  -5   0   6 4491.30 160.454  14
  -5   0   6 4562.77 169.785  22
  -5   0   5 17506.5 847.606   2
  -5   0   5 16994.6 882.667   6
   5   0  -5 15845.5 819.018  18
  -5   0   4 639.553 167.313   6
   5   0  -4 851.587 169.854  18
  -5   0   4 838.415 163.625   2
  -5   0   3 11033.4 627.767   6
   5   0  -3 10206.2 531.045  18
  -5   0   3 9899.09 521.995   2
  -5   0   2 615.693 143.277   6
   5   0  -2 719.908 127.128  18
  -5   0   2 758.183 128.651   2
  -5   0   1 33902.4 1131.78   6
  -5   0   0 45058.3 1250.86   3
  -5   0   0 45170.8 1317.44   6
  -5   0  -1 4505.60 346.798   6
  -5   0  -1 4746.04 356.841   3
   5   0   1 4811.81 290.872   5
   5   0   2 9.25926 38.9761   4
  -5   0  -2-13.1511 66.5203   6
  -5   0  -2 52.1600 60.6403   3
   5   0   2 151.439 59.4337   5
   5   0   3 151.274 86.9621   4
  -5   0  -3 144.709 79.8264  20
  -5   0  -3-27.1663 90.9582   3
   5   0   3 66.9525 59.8842   5
  -5   0  -4 27740.2 1095.82   3
  -5   0  -4 25862.2 1034.14  20
   5   0   4 25921.6 957.914   5
   5   0   4 25673.9 926.309   4
  -5   0  -5 3378.92 376.287  20
   5   0   5 4153.70 375.274   5
   5   0   5 4459.51 379.724   4
  -5   0  -6 2157.01 102.791  16
  -5   0  -6 2101.53 107.840  12
  -5   0  -7 1551.95 85.1626  16
  -5   0  -7 1346.42 86.6981  12
  -5   0  -8 3204.49 134.968  12
  -5   0  -9 2051.93 97.2995  12
  -5   0 -10 154.740 25.3490  12
  -5   1  11 800.647 48.1117   9
  -5   1  11 751.817 38.3210  14
   5   1 -11 842.635 52.7023  23
  -5   1  10 944.485 63.7970   9
  -5   1  10 1013.91 57.7851  14
  -5   1   9 440.209 46.2508  14
  -5   1   8 4662.72 162.567  14
  -5   1   7 38252.7 752.163  14
  -5   1   6 4321.02 155.310  14
  -5   1   5 3173.84 352.523   2
  -5   1   5 2990.60 363.774   6
   5   1  -5 2902.31 316.796  18
  -5   1   4 355.458 124.752   6
   5   1  -4 249.013 108.806  18
  -5   1   4 385.202 127.712   2
  -5   1   3 1673.67 242.671   6
  -5   1   3 2036.41 233.906   2
  -5   1   2 13475.6 674.240   6
  -5   1   2 12309.5 568.139   2
  -5   1   1 11510.5 510.755   3
  -5   1   1 11318.7 596.660   6
  -5   1   1 10718.4 493.209   2
  -5   1   0 1054.95 170.017   6
  -5   1   0 1078.66 139.880   2
  -5   1   0 1098.04 165.583   3
  -5   1  -1 59922.3 1543.88   6
  -5   1  -1 58773.5 1549.06   3
   5   1   1 54885.0 1324.19   5
  -5   1  -2 2449.42 262.440   6
  -5   1  -2 2325.18 269.569   3
   5   1   2 1901.65 198.092   5
   5   1   2 2462.21 215.669   4
  -5   1  -3 12349.3 669.056   3
   5   1   3 10457.9 528.701   5
   5   1   3 11528.5 529.465   4
  -5   1  -4 1798.16 266.662   3
   5   1   4 1614.42 221.200   5
   5   1   4 2050.04 238.867   4
  -5   1  -5 3067.56 358.470   3
   5   1   5 2481.70 286.881   5
   5   1   5 2482.09 281.570   4
  -5   1  -5 2749.97 120.873  12
  -5   1  -6 1166.04 76.4075  16
  -5   1  -6 1153.61 79.0611  12
  -5   1  -7 2005.68 98.7971  16
  -5   1  -7 1911.97 105.864  12
  -5   1  -8 1717.85 98.0087  12
  -5   1  -9 1387.35 81.5005  12
  -5   1 -10 555.938 44.3856  12
  -5   2  11 2490.00 86.8774   9
   5   2 -11 2515.81 92.0707  23
  -5   2  10 33.4694 22.6777   9
  -5   2  10 62.2739 21.2467  14
  -5   2   9 1109.84 75.3097   9
  -5   2   9 1143.99 70.2900  14
  -5   2   8 10705.2 282.981   9
  -5   2   8 10370.3 270.890  14
  -5   2   7 8100.57 229.716  14
  -5   2   6 1999.93 100.689  14
  -5   2   5 645.588 177.869   6
   5   2  -5 425.193 114.809  18
   5   2  -5 847.280 167.729  17
  -5   2   5 802.801 174.340   2
  -5   2   5 832.927 61.8050  14
  -5   2   4 978.907 203.512   6
   5   2  -4 946.302 159.051  17
  -5   2   4 956.319 186.193   2
  -5   2   3 21343.0 905.399   6
   5   2  -3 20107.8 724.613  17
  -5   2   3 18774.5 804.470   2
  -5   2   2 56262.5 1603.08   6
   5   2  -2 57795.3 1395.69  17
  -5   2   2 55788.0 1498.21   2
  -5   2   1 1488.01 210.050   6
   5   2  -1 1404.28 160.495  17
  -5   2   1 1408.46 180.978   2
  -5   2   0 8689.31 493.021   6
  -5   2   0 8006.30 457.328   3
   5   2   0 9181.34 426.285  17
  -5   2   0 8067.24 426.341   2
  -5   2  -1 7534.48 455.515   6
  -5   2  -1 7341.96 460.163   3
  -5   2  -2 9132.70 515.248   6
  -5   2  -2 9229.60 546.078   3
   5   2   2 7731.35 413.112   5
   5   2   3 1754.13 209.517   5
  -5   2  -3 1690.29 245.090   3
  -5   2  -4 13985.5 767.925   3
   5   2   4 13944.8 668.456   5
   5   2   4 13906.6 633.270   4
  -5   2  -5 4246.87 154.054  16
   5   2   5 4045.68 373.189   5
   5   2   5 3971.76 354.092   4
  -5   2  -5 4162.30 155.699  12
  -5   2  -6 515.768 55.6231  12
  -5   2  -6 560.688 54.7982  16
  -5   2  -7 10268.7 272.664  16
  -5   2  -7 10479.8 287.669  12
  -5   2  -8 10147.0 261.453  16
  -5   2  -8 10615.2 283.446  12
  -5   2  -9 367.715 45.8301  12
  -5   2 -10-28.5296 20.8042  12
  -5   3  11 115.759 20.4095   9
  -5   3  10 1757.57 81.4650   9
  -5   3  10 1585.23 70.3501  14
  -5   3   9 2578.10 113.308   9
  -5   3   9 2530.34 103.164  14
  -5   3   8 2815.84 124.648   9
  -5   3   8 2783.49 116.631  14
  -5   3   7 5094.83 175.951   9
  -5   3   7 5196.40 171.252  14
  -5   3   6 2579.42 117.764   9
  -5   3   6 2773.43 118.339  14
  -5   3   5 12487.2 762.726   6
   5   3  -5 12166.7 652.525  17
  -5   3   5 14275.5 329.769   9
  -5   3   5 13714.2 323.375  14
  -5   3   4 16763.7 837.295   6
   5   3  -4 16008.1 707.751  17
  -5   3   4 16688.1 807.779   2
  -5   3   3 8240.04 538.036   6
   5   3  -3 8223.93 466.010  17
  -5   3   3 8368.99 524.479   2
  -5   3   2 37868.8 1231.52   6
   5   3  -2 38803.9 1115.11  17
  -5   3   2 36045.2 1167.00   2
  -5   3   1 45659.3 1346.67   6
   5   3  -1 48570.4 1278.00  17
  -5   3   1 45842.0 1311.61   2
  -5   3   0 11774.3 582.777   6
  -5   3   0 12061.2 592.881   3
   5   3   0 13504.4 576.970  17
  -5   3   0 12262.0 572.518   2
  -5   3  -1 5186.82 373.789   6
  -5   3  -1 5073.15 392.772   3
   5   3   1 4760.53 330.076  17
  -5   3  -2 14784.8 729.229   3
   5   3   2 13451.2 575.562  17
   5   3   2 13896.1 572.700   5
  -5   3  -3 5333.21 449.071   3
   5   3   3 5518.31 380.161   5
  -5   3  -4 4073.64 407.798   3
   5   3   4 4181.38 355.113   5
  -5   3  -5 595.554 55.1712  16
  -5   3  -5 619.901 58.2875  12
  -5   3  -6 7096.94 216.935  16
  -5   3  -6 7036.82 222.223  12
  -5   3  -7 5178.98 176.188  16
  -5   3  -7 5155.48 184.477  12
  -5   3  -8 1284.66 77.1976  16
  -5   3  -8 1293.07 84.1775  12
  -5   3  -9 481.223 50.4781  12
  -5   3 -10 358.904 38.0743  12
  -5   4  11 6.60141 12.1223   9
  -5   4  10 54.7407 21.1729   9
  -5   4   9 638.330 54.7355   9
  -5   4   9 647.005 50.4586  14
  -5   4   8 2432.50 112.913   9
  -5   4   8 2423.08 105.272  14
  -5   4   7 12052.8 307.839   9
  -5   4   7 12048.1 299.226  14
  -5   4   6 3773.50 145.270   9
  -5   4   6 3761.36 140.881  14
  -5   4   5 6692.29 201.236   9
  -5   4   5 6760.26 197.083  14
  -5   4   4 4239.83 403.380   6
   5   4  -4 4369.24 366.334  17
  -5   4   4 3886.07 387.431   2
  -5   4   3 13092.7 688.249   6
   5   4  -3 13995.5 665.121  17
  -5   4   3 13767.4 715.855   2
  -5   4   2 16900.8 753.837   6
   5   4  -2 16427.2 704.979  17
  -5   4   2 15862.7 743.330   2
  -5   4   1 10738.2 560.245   6
   5   4  -1 10770.9 548.651  17
  -5   4   1 11146.4 585.239   2
  -5   4   0 25917.9 897.119   6
  -5   4   0 24915.0 933.218   3
   5   4   0 23526.3 859.071  17
  -5   4   0 23540.2 887.533   2
  -5   4  -1 3346.08 300.204   6
  -5   4  -1 3570.72 347.079   3
   5   4   1 3580.50 300.841  17
   5   4   2 857.324 152.137  17
  -5   4  -2 1623.39 248.934   3
  -5   4  -3 2298.59 302.857   3
   5   4   3 1825.70 220.827   5
  -5   4  -4 3275.50 377.146   3
   5   4   4 3260.34 320.296   5
  -5   4  -4 3558.04 142.263  16
  -5   4  -4 4261.65 151.986  12
  -5   4  -5 3522.53 144.383  16
  -5   4  -5 3677.40 148.175  12
  -5   4  -6 3398.85 142.225  16
  -5   4  -6 3543.11 147.599  12
  -5   4  -7 18241.8 416.903  16
  -5   4  -7 18132.5 426.271  12
  -5   4  -8 1252.47 76.6469  16
  -5   4  -8 1219.82 83.7660  12
  -5   4  -9 690.319 59.0370  12
  -5   4 -10 366.352 36.9416  12
  -5   5  10 1244.89 61.9782   9
  -5   5   9 910.908 60.9939  11
  -5   5   9 946.423 63.7454   9
  -5   5   8 1945.53 99.4640  11
  -5   5   8 2139.85 103.205   9
  -5   5   8 2023.52 94.0889  14
  -5   5   7 1156.98 79.4495  11
  -5   5   7 1175.22 77.9807   9
  -5   5   7 1276.89 77.3580  14
  -5   5   6 5553.28 189.086  11
  -5   5   6 5614.83 183.578   9
  -5   5   6 5235.86 173.048  14
  -5   5   5 16220.3 376.293   9
  -5   5   5 16497.3 369.343  14
  -5   5   4 1820.11 91.0526   9
  -5   5   4 1639.27 84.7490  14
   5   5  -3 11427.6 627.333  17
  -5   5   3 11247.1 665.753   2
   5   5  -2 110.088 77.1650  17
  -5   5   2 38.3821 75.4352   2
   5   5  -1 610.816 143.722  17
  -5   5   1 688.392 152.273   2
  -5   5   0 2587.18 293.684   3
   5   5   0 2573.51 269.898  17
  -5   5   0 2537.68 282.893   2
   5   5   1 626.525 145.135  17
  -5   5  -1 730.468 167.733   3
  -5   5  -2 7786.48 562.760   3
   5   5   2 7200.02 469.585  17
  -5   5  -3 4158.40 419.929   3
   5   5   3 3521.19 339.266  17
  -5   5  -3 4220.28 153.654  16
  -5   5  -4 10287.8 279.991  16
  -5   5  -4 10611.6 279.790  12
  -5   5  -5 2172.30 112.150  16
  -5   5  -5 2263.22 114.543  12
  -5   5  -6 24714.0 533.306  16
  -5   5  -6 24576.4 540.047  12
  -5   5  -7 440.307 55.0261  12
  -5   5  -7 378.253 48.1289  16
  -5   5  -8 1009.86 68.0640  16
  -5   5  -8 981.159 74.4766  12
  -5   5  -9 407.122 43.9630  12
  -5   5  -9 336.840 34.9023  16
  -5   5 -10 1085.47 57.8075  12
  -5   6  10 1013.74 51.3340   9
  -5   6   9 477.732 43.5934  11
  -5   6   9 568.457 46.1710   9
  -5   6   8 1626.58 89.5018  11
  -5   6   8 1777.67 90.1711   9
  -5   6   7 2425.79 116.694  11
  -5   6   7 2516.68 113.136   9
  -5   6   7 2457.97 107.260  14
  -5   6   6 4441.43 167.456  11
  -5   6   6 4334.03 159.144   9
  -5   6   6 4606.75 154.920  14
  -5   6   5 13863.2 344.166  11
  -5   6   5 13330.0 329.525   9
  -5   6   5 13678.8 323.019  14
  -5   6   4 6534.93 206.938  11
  -5   6   4 6493.34 196.973   9
  -5   6   4 6487.29 189.614  14
  -5   6   3 13726.7 335.805  11
  -5   6   3 13907.1 323.203   9
  -5   6   3 13615.7 312.815  14
   5   6  -2 9165.44 564.228  17
   5   6  -1 872.036 165.075  17
  -5   6   1 920.266 176.429   2
  -5   6   0 2933.24 330.799   3
   5   6   0 2556.26 287.856  17
  -5   6   0 2709.03 300.541   2
   5   6   1 2084.86 257.960  17
  -5   6  -1 1790.96 269.036   3
  -5   6  -2 10250.6 270.757  16
  -5   6  -3 5625.75 188.696  16
  -5   6  -4 6068.11 202.339  16
  -5   6  -4 6261.29 197.742  12
  -5   6  -5 18627.7 434.835  16
  -5   6  -5 18835.0 433.429  12
  -5   6  -6 981.275 76.2257  16
  -5   6  -6 926.252 74.9652  12
  -5   6  -7 1860.74 99.1754  16
  -5   6  -7 1819.76 101.716  12
  -5   6  -8 305.907 43.4586  12
  -5   6  -8 344.591 41.8708  16
  -5   6  -9 631.008 43.8295  16
  -5   6  -9 565.548 47.8328  12
  -5   6 -10 1087.76 52.8314  12
  -5   7   9 163.507 25.1092  11
  -5   7   9 231.004 29.9034   9
  -5   7   8 297.924 38.7718  11
  -5   7   8 206.056 32.9373   9
  -5   7   7 2626.39 118.785  11
  -5   7   7 2707.91 115.275   9
  -5   7   6 7378.76 225.427  11
  -5   7   6 7235.75 215.918   9
  -5   7   5 17725.3 416.569  11
  -5   7   5 17498.9 400.802   9
  -5   7   4 5736.84 195.210  11
  -5   7   4 5666.73 182.634   9
  -5   7   3 7039.56 220.418  11
  -5   7   3 7263.49 208.608   9
  -5   7   2 3273.15 136.555  11
  -5   7   2 3384.67 127.623   9
  -5   7  -1 6882.21 205.870  16
  -5   7  -2 1108.66 76.3916  16
  -5   7  -3 624.129 61.1320  16
  -5   7  -4 101.421 30.7936  16
  -5   7  -5 14018.9 354.249  16
  -5   7  -5 14187.0 345.404  12
  -5   7  -6 1394.83 88.7185  16
  -5   7  -6 1388.55 87.5653  12
  -5   7  -7 939.781 68.0979  16
  -5   7  -7 908.743 67.0949  12
  -5   7  -8 831.448 57.8386  16
  -5   7  -8 752.858 56.6754  12
  -5   7  -9 711.976 42.3885  16
  -5   7  -9 648.699 44.8845  12
  -5   8   9 958.189 48.8709  11
  -5   8   9 952.259 49.0401   9
  -5   8   8 1008.28 61.4321  11
  -5   8   8 1121.66 62.8819   9
  -5   8   7 2079.81 99.8275  11
  -5   8   7 2221.55 98.1176   9
  -5   8   6 1258.54 82.3965  11
  -5   8   6 1248.27 77.5725   9
  -5   8   5 2360.15 117.295  11
  -5   8   5 2426.25 111.293   9
  -5   8   4 11654.1 310.473  11
  -5   8   4 11643.5 295.995   9
  -5   8   3 3189.59 139.458  11
  -5   8   3 3090.73 127.366   9
  -5   8   2 13731.1 347.606  11
  -5   8   2 14252.9 334.674   9
  -5   8   1 4007.08 144.192   7
  -5   8   0 2011.01 96.6778   7
  -5   8  -1 19226.4 418.123   7
  -5   8  -2 2738.41 125.953  16
  -5   8  -3 2876.51 132.124  16
  -5   8  -4 2893.87 131.802  16
  -5   8  -5 56.6928 31.7239  16
  -5   8  -6 661.962 60.5347  16
  -5   8  -6 602.054 51.4110  12
  -5   8  -7 1465.65 81.0665  16
  -5   8  -7 1569.68 80.0324  12
  -5   8  -8 269.755 31.5474  12
  -5   8  -8 272.984 32.4076  16
  -5   9   8 707.324 45.4998  11
  -5   9   8 808.211 47.8718   9
  -5   9   7 378.106 40.3332  11
  -5   9   7 391.336 39.7505   9
  -5   9   6 1529.11 85.5962  11
  -5   9   6 1594.94 83.1056   9
  -5   9   5 868.755 68.3774  11
  -5   9   5 839.085 63.1500   9
  -5   9   4 781.990 66.9805  11
  -5   9   4 853.289 65.1605   9
  -5   9   3 5272.34 186.363  11
  -5   9   3 5531.75 179.127   9
  -5   9   2 8714.65 240.762   7
  -5   9   1 8535.34 235.090   7
  -5   9   0 9792.05 257.436   7
  -5   9  -1 1205.18 74.3527   7
  -5   9  -2 1319.94 86.1203  16
  -5   9  -2 1155.45 72.4161   7
  -5   9  -3 6075.13 199.558  16
  -5   9  -3 5839.81 179.506   7
  -5   9  -4 4046.67 156.130  16
  -5   9  -5 224.197 40.5784  16
  -5   9  -6 1263.96 76.2238  16
  -5   9  -7 423.715 41.7882  16
  -5   9  -8 60.7406 20.3411  16
  -5  10   7 331.544 33.3112  11
  -5  10   6 983.365 62.5601  11
  -5  10   6 1096.98 62.6928   9
  -5  10   5 492.048 49.7691  11
  -5  10   5 537.408 48.7993   9
  -5  10   4 226.162 41.0270  11
  -5  10   3 1082.40 71.9975   7
  -5  10   2 6112.28 187.892   7
  -5  10   1 6774.72 200.646   7
  -5  10   0 2608.43 112.449   7
  -5  10  -1 2750.61 114.501   7
  -5  10  -2 1142.67 74.5692  16
  -5  10  -2 1007.19 65.8630   7
  -5  10  -3 2308.29 109.320  16
  -5  10  -3 2235.07 98.0647   7
  -5  10  -4 1855.82 95.4195  16
  -5  10  -4 1755.23 82.3787   7
  -5  10  -5 637.336 55.4080  16
  -5  10  -6 868.033 58.0334  16
  -5  10  -7 213.699 26.7460  16
  -5  11   6 199.597 25.0182   7
  -5  11   5 1893.78 79.7394   7
  -5  11   4 657.668 50.3525   7
  -5  11   3 1326.36 72.7508   7
  -5  11   2 1815.90 88.5482   7
  -5  11   1 1793.37 88.2768   7
  -5  11   0 537.389 48.0624   7
  -5  11  -1 683.925 53.5721   7
  -5  11  -2 1102.36 65.1764   7
  -5  11  -3 874.319 59.6778  16
  -5  11  -3 922.366 57.2948   7
  -5  11  -4 778.461 54.8000  16
  -5  11  -4 641.480 44.5309   7
  -5  11  -5 218.640 29.9768  16
  -5  11  -6 543.177 38.8491  16
  -5  12   5 23.1276 14.5250   7
  -5  12   4 1345.78 61.8575   7
  -5  12   3 400.051 36.5429   7
  -5  12   2 112.138 23.5606   7
  -5  12   1 600.693 46.4614   7
  -5  12   0 135.912 26.1957   7
  -5  12  -1 162.417 26.1210   7
  -5  12  -2 444.053 38.3450   7
  -5  12  -3 1174.54 57.6716  16
  -5  12  -3 1191.64 56.8277   7
  -5  12  -4 410.094 33.3141  16
  -5  13   2 1059.78 50.1887   7
  -5  13   1 919.778 47.6442   7
  -5  13   0 842.746 45.9637   7
  -5  13  -1 154.876 21.8997   7
  -6 -12   3 812.422 42.8925  15
  -6 -12   2 629.690 39.2350  15
  -6 -12   1 1369.60 57.5289  15
  -6 -12   0 76.2024 17.0470  10
  -6 -12  -1 11.7291 13.1960  10
  -6 -12  -2 1245.87 55.4835  10
  -6 -12  -3 541.679 35.5144  10
  -6 -11   5 91.8813 18.8883  15
  -6 -11   4 161.846 24.3793  15
  -6 -11   3 1199.89 63.8950  15
  -6 -11   2 1266.13 67.4004  15
  -6 -11   1 152.399 27.3928  15
  -6 -11   0 225.306 29.3930  10
  -6 -11   0 161.618 25.5677  15
  -6 -11  -1 231.830 31.6689  10
  -6 -11  -2 255.063 31.9198  10
  -6 -11  -3 2309.93 89.7416  10
  -6 -11  -4 502.747 38.7185  10
  -6 -11  -5 653.376 38.3076  10
  -6 -10   6 1363.43 58.3748  15
  -6 -10   6 1429.26 64.9509  14
  -6 -10   5 1628.50 74.1849  15
  -6 -10   4 198.354 31.6067  15
  -6 -10   3 488.410 49.1833  15
  -6 -10   2 525.612 50.1631  15
  -6 -10   1 193.875 31.1777  10
  -6 -10   1 176.910 33.7439  15
  -6 -10   0 981.951 65.0774  10
  -6 -10   0 993.049 63.0389  15
  -6 -10  -1 2562.77 108.445  10
  -6 -10  -2 921.585 64.7460  10
  -6 -10  -3 979.877 64.5682  10
  -6 -10  -4 605.821 49.5086  10
  -6 -10  -5 53.0187 20.3178  10
  -6 -10  -6 1236.01 52.1962  10
  -6  -9   7 168.974 24.3819  14
  -6  -9   6 34.3073 19.3210  15
  -6  -9   5 131.442 26.7396  15
  -6  -9   4 196.705 36.0257  15
  -6  -9   3 2666.29 118.939  15
  -6  -9   2 1549.02 80.2173  10
  -6  -9   2 1680.40 93.6651  15
  -6  -9   1 822.202 60.7398  10
  -6  -9   1 865.633 66.4302  15
  -6  -9   0 1295.39 79.8142  10
  -6  -9   0 1239.91 76.6130  15
  -6  -9  -1 20.2456 24.4667  10
  -6  -9  -1 34.3828 21.8647  15
  -6  -9  -2 668.966 61.4493  10
  -6  -9  -3 481.582 53.0853  10
  -6  -9  -4 346.741 43.8972  10
  -6  -9  -5 787.043 55.4332  10
  -6  -9  -6 819.245 48.6400  10
  -6  -8   8 113.221 20.3314  14
  -6  -8   7 180.440 23.7864  15
  -6  -8   7 160.936 28.7460  14
  -6  -8   6 807.420 55.3869  15
  -6  -8   5 1150.15 74.4886  15
  -6  -8   4 5438.02 182.021  15
  -6  -8   3 2871.29 129.229  15
  -6  -8   2 48.8656 22.2728  10
  -6  -8   2 60.0000 29.8740  15
  -6  -8   1 651.081 58.2432  10
  -6  -8   1 786.932 65.7455  15
  -6  -8   0 3074.39 131.555  10
  -6  -8   0 3000.45 127.326  15
  -6  -8  -1 21.4494 25.6779  10
  -6  -8  -1 55.8989 26.4611  15
  -6  -8  -2 4342.36 162.833  10
  -6  -8  -3 1303.92 84.9098  10
  -6  -8  -4 40.9556 25.3344  10
  -6  -8  -5 1992.35 94.0425  10
  -6  -8  -6 189.265 28.7408  10
  -6  -7   8 689.079 48.4283  14
  -6  -7   7 387.806 44.5973  14
  -6  -7   6 3560.21 129.223  15
  -6  -7   5 7461.06 221.329  15
  -6  -7   4 3102.96 136.066  15
  -6  -7   3 3840.43 154.610  15
  -6  -7   2 3030.75 124.532  10
  -6  -7   2 3119.96 138.049  15
  -6  -7   1 17764.6 407.484  10
  -6  -7   1 18242.2 420.407  15
  -6  -7   0 4851.96 172.977  10
  -6  -7   0 4679.45 167.421  15
  -6  -7  -1 9959.14 277.931  10
  -6  -7  -1 10057.0 263.911  15
  -6  -7  -2 4552.20 171.080  10
  -6  -7  -3 3129.01 135.753  10
  -6  -7  -4 2762.36 123.981  10
  -6  -7  -5 136.027 31.5814  10
  -6  -7  -6 579.416 47.5327  10
  -6  -6   9 266.983 28.9979  14
   6  -6  -9 222.031 27.0599  23
  -6  -6   8 52.0345 23.8072  22
  -6  -6   8 38.3633 22.1656  14
   6  -6  -8 38.0461 20.9634  23
  -6  -6   7 1470.48 84.5537  14
  -6  -6   6 3067.00 121.177  15
  -6  -6   5 15129.4 362.340  15
  -6  -6   4 1932.00 106.411  15
  -6  -6   3 17530.5 390.655  10
  -6  -6   3 18017.8 421.671  15
  -6  -6   2 17967.6 407.009  10
  -6  -6   2 18849.7 430.692  15
  -6  -6   1 3058.89 129.503  10
  -6  -6   1 3148.26 136.032  15
  -6  -6   0 13410.1 332.667  10
  -6  -6   0 13111.7 328.516  15
  -6  -6  -1 10508.4 287.999  10
  -6  -6  -1 10415.2 274.054  15
  -6  -6  -1 11024.1 275.184  12
  -6  -6  -2 779.864 67.3692  10
  -6  -6  -2 859.822 62.1674  12
  -6  -6  -3 1929.04 105.437  10
  -6  -6  -4 4561.67 166.776  10
  -6  -6  -5 6093.10 191.638  10
  -6  -5   9 235.779 30.3556  14
   6  -5  -9 191.597 29.2638  23
  -6  -5   8 560.766 51.5390  14
   6  -5  -8 540.136 49.3773  23
  -6  -5   8 616.187 51.9092  22
  -6  -5   7 3668.62 142.106  14
   6  -5  -7 3500.97 134.290  23
  -6  -5   7 3641.50 142.273  22
  -6  -5   6 3980.63 141.169  15
  -6  -5   6 3947.68 154.339  14
  -6  -5   5 2147.88 107.275  15
  -6  -5   4 20774.7 466.889  15
  -6  -5   3 11460.9 286.783  10
  -6  -5   3 12261.7 313.957  15
  -6  -5   2 26285.0 545.455  10
  -6  -5   2 26787.3 564.661  15
  -6  -5   1 496.788 51.6309  10
  -6  -5   1 427.895 48.4540  15
  -6  -5   0 1436.42 86.3998  10
  -6  -5   0 1443.87 85.5055  15
  -6  -5   0 1511.99 84.7697  12
  -6  -5  -1 1680.95 96.5117  10
  -6  -5  -1 1784.36 91.8397  15
  -6  -5  -1 1838.05 93.8397  12
  -6  -5  -2 1612.79 94.1855  10
  -6  -5  -2 1581.53 86.3845  12
  -6  -5  -3 6056.00 199.082  10
  -6  -5  -3 6156.27 188.091  12
  -6  -5  -4 507.748 53.5890  10
  -6  -5  -4 704.055 56.2801  12
  -6  -5  -5 6225.61 192.879  10
  -6  -4  10 338.027 27.3781  14
   6  -4 -10 325.499 31.9596  23
  -6  -4   9 696.957 50.5506  14
   6  -4  -9 621.159 49.5001  23
  -6  -4   8 467.681 50.0709  22
  -6  -4   8 417.764 46.5076  14
   6  -4  -8 456.762 47.8697  23
  -6  -4   7 7257.21 220.499  14
   6  -4  -7 7300.85 214.897  23
  -6  -4   7 7257.51 223.046  22
  -6  -4   6 8108.43 241.308  14
  -6  -4   5 18328.9 412.144  15
  -6  -4   4 12053.4 306.854  15
  -6  -4   3 7209.76 208.409  10
  -6  -4   3 7775.30 226.657  15
  -6  -4   2 920.713 184.737   6
  -6  -4   2 1020.32 69.0638  10
  -6  -4   2 1060.31 74.2584  15
  -6  -4   1 6643.42 490.451   6
   6  -4  -1 7001.59 605.148  19
  -6  -4   1 7672.22 219.157  10
  -6  -4   1 7788.79 224.408  15
  -6  -4   1 8122.33 220.973  12
  -6  -4   0 36598.9 1302.41   6
   6  -4   0 36155.3 1442.43  19
  -6  -4   0 43058.9 824.770  10
  -6  -4   0 43992.6 823.624  15
  -6  -4   0 43933.8 820.251  12
  -6  -4  -1 13608.5 705.404   6
  -6  -4  -1 12157.9 738.874  21
   6  -4   1 12755.0 713.455  19
  -6  -4  -1 13311.3 326.001  10
  -6  -4  -1 13407.4 316.167  15
  -6  -4  -1 13508.9 322.085  12
  -6  -4  -2 10352.1 273.794  10
  -6  -4  -2 10017.5 254.151  15
  -6  -4  -2 10490.3 269.282  12
  -6  -4  -3 263.033 37.5327  12
  -6  -4  -3 266.110 39.5292  10
  -6  -4  -4 929.380 68.4307  10
  -6  -4  -4 869.346 65.4885  12
  -6  -4  -5 1888.77 94.8894  12
  -6  -3  10 1651.08 64.9443  14
   6  -3 -10 1471.86 69.7420  23
  -6  -3   9 434.088 42.0063  14
   6  -3  -9 446.762 45.1909  23
  -6  -3   8 127.185 33.5609  22
  -6  -3   8 164.958 36.3212  14
   6  -3  -8 149.021 35.4899  23
  -6  -3   7 5349.20 182.005  14
   6  -3  -7 5196.34 178.919  23
  -6  -3   7 5215.87 184.656  22
  -6  -3   6 4206.46 161.508  14
  -6  -3   5 528.523 50.3264  15
  -6  -3   5 481.552 54.5974  14
  -6  -3   4 17902.3 385.469  10
  -6  -3   4 17456.1 397.871  15
  -6  -3   3 15408.5 834.566   6
   6  -3  -3 14612.7 880.386  18
  -6  -3   3 16322.4 364.547  10
  -6  -3   3 16220.3 371.719  15
  -6  -3   2 7513.07 546.444   6
   6  -3  -2 9345.32 688.889  19
  -6  -3   1 7412.49 521.062   6
   6  -3  -1 7051.40 591.388  19
  -6  -3   0 829.903 169.284   6
   6  -3   0 746.088 207.368  19
  -6  -3  -1 10535.8 618.334   6
   6  -3   1 9665.81 663.562  19
  -6  -3  -2 1812.32 275.357  21
  -6  -3  -2 2029.17 98.2459  12
  -6  -3  -3 441.033 46.4448  10
  -6  -3  -3 533.758 52.0956  12
  -6  -3  -4 6657.80 199.206  10
  -6  -3  -4 7009.47 207.866  12
  -6  -3  -5 1907.47 98.2466  12
  -6  -3  -6 3086.27 126.744  12
  -6  -3  -7 2917.48 116.928  12
  -6  -2  10 233.596 26.7080  14
   6  -2 -10 246.046 32.0122  23
  -6  -2   9 904.433 60.1314  14
   6  -2  -9 833.984 62.1528  23
  -6  -2   8 747.793 61.8494  14
  -6  -2   7 309.333 46.9244  22
  -6  -2   7 356.317 47.4764  14
  -6  -2   6 10795.1 292.561  14
  -6  -2   5 8338.28 224.390  15
  -6  -2   5 8270.93 241.793  14
  -6  -2   4 7081.21 196.781  10
  -6  -2   4 7055.57 203.028  15
  -6  -2   4 7040.09 212.973  14
   6  -2  -3 152.337 95.6054  19
   6  -2  -3 326.283 146.005  18
  -6  -2   2 13830.4 758.650   6
   6  -2  -2 12204.0 742.983  19
   6  -2  -2 14490.6 768.635  18
  -6  -2   1 8160.05 554.103   6
   6  -2  -1 7780.30 564.459  19
  -6  -2   0 5299.25 434.028   6
   6  -2   0 4856.16 450.357  19
  -6  -2  -1 7347.72 516.670   6
   6  -2   1 6838.38 535.717  19
  -6  -2  -3 20972.3 455.599  12
   6  -2   3 19926.4 883.363   4
  -6  -2  -4 7952.48 229.842  12
  -6  -2  -5 909.270 68.7250  12
  -6  -2  -6 4376.31 159.634  12
  -6  -2  -7 7096.80 209.842  12
  -6  -2  -8 779.111 57.1555  12
  -6  -1  10 126.622 25.3473   9
  -6  -1  10 176.818 25.6624  14
   6  -1 -10 123.816 27.2163  23
  -6  -1   9 225.039 35.0160  14
  -6  -1   8 1099.12 75.4713  14
  -6  -1   7 401.716 51.6922  14
  -6  -1   6 12922.7 329.108  14
  -6  -1   6 12910.1 331.085  22
  -6  -1   5 7350.23 196.305  10
  -6  -1   5 7095.64 219.749  14
  -6  -1   4 693.539 54.1349  10
  -6  -1   4 668.193 53.4301  15
  -6  -1   4 644.948 56.7602  14
  -6  -1   3 75.7491 67.8202   6
   6  -1  -3-8.73065 69.4218  18
  -6  -1   2 10244.1 657.339   6
   6  -1  -2 11074.6 617.755  18
  -6  -1   1 3827.79 378.056   6
   6  -1  -1 3617.05 319.089  18
  -6  -1   0 8125.65 544.971   6
  -6  -1  -1 1604.95 238.905   6
   6  -1   1 1672.05 245.595  19
   6  -1   2 4108.90 337.400   4
  -6  -1  -2 4561.47 408.864   6
   6  -1   2 3300.87 299.257   5
   6  -1   3 4844.51 386.129   5
  -6  -1  -3 5479.91 178.011  12
   6  -1   3 4977.61 393.784   4
  -6  -1  -4 1460.19 87.6721  12
  -6  -1  -5 5818.89 191.616  12
  -6  -1  -6 148.413 36.2817  12
  -6  -1  -7 3820.92 147.747  12
  -6  -1  -8 1127.92 72.0698  12
  -6  -1  -9 1151.51 62.4618  12
  -6   0  10 852.827 53.7852   9
  -6   0  10 830.377 49.0944  14
   6   0 -10 1003.14 60.5232  23
  -6   0   9 3108.19 120.479   9
  -6   0   9 3253.99 119.104  14
  -6   0   8 5535.13 180.129  14
  -6   0   7 22131.0 484.315  14
  -6   0   6 2701.01 123.692  14
  -6   0   5 1359.60 73.3507  10
  -6   0   5 1441.12 87.1969  14
  -6   0   4-31.1868 26.7918  15
  -6   0   4 2.59816 19.6005  14
  -6   0   3 1916.73 286.018   6
   6   0  -3 2125.58 273.305  18
  -6   0   2 3389.49 370.784   6
   6   0  -2 3041.21 304.600  18
  -6   0   1 5966.41 477.493   6
   6   0  -1 6477.30 410.008  18
  -6   0   0 1232.52 206.598   6
  -6   0  -1 1281.59 217.415   6
  -6   0  -2 502.094 147.571   6
   6   0   3 91.6272 58.2949   5
  -6   0  -4 13436.1 327.383  16
  -6   0  -4 12845.2 326.985  12
  -6   0  -5 5145.46 177.944  16
  -6   0  -5 4952.21 176.706  12
  -6   0  -6 3110.02 132.337  16
  -6   0  -6 2937.14 131.908  12
  -6   0  -7 1591.52 94.1261  12
  -6   0  -8 36.0590 26.0133  12
  -6   0  -9 980.693 60.9867  12
  -6   0 -10 266.421 26.2447  12
  -6   1  10 163.685 27.6195   9
  -6   1  10 129.509 22.2857  14
  -6   1   9 243.096 36.3685   9
  -6   1   9 206.623 34.7962  14
  -6   1   8 983.466 71.0069   9
  -6   1   8 1247.60 78.3256  14
  -6   1   7 356.489 48.0446  14
  -6   1   6 14089.8 306.013  10
  -6   1   6 13250.3 335.807  14
  -6   1   5 7521.94 199.673  10
  -6   1   5 7632.41 223.042  14
  -6   1   4 714.845 53.1034  10
  -6   1   4 735.685 59.2725  14
  -6   1   3 85.2413 90.9458   6
   6   1  -3-172.053 89.8434  18
  -6   1   2 11134.4 687.350   6
   6   1  -2 11203.7 593.251  18
  -6   1   1 3419.99 356.680   6
  -6   1   0 6497.45 452.439   3
  -6   1   0 6903.42 496.849   6
  -6   1  -1 1639.23 237.416   6
  -6   1  -1 1529.93 228.342   3
  -6   1  -2 4125.81 385.783   6
  -6   1  -2 3801.29 380.068   3
  -6   1  -3 5790.92 499.136   3
  -6   1  -3 5624.07 180.394  16
  -6   1  -3 5556.03 180.169  12
  -6   1  -4 1588.92 92.3606  16
  -6   1  -4 1481.63 88.7713  12
  -6   1  -5 6224.06 201.145  16
  -6   1  -5 5974.87 200.061  12
  -6   1  -6 183.756 39.3141  12
  -6   1  -6 265.759 42.5002  16
  -6   1  -7 4089.85 149.479  16
  -6   1  -7 3768.22 153.287  12
  -6   1  -8 1077.36 73.8187  12
  -6   1  -9 1184.37 68.2588  12
  -6   1 -10 114.957 20.5960  12
  -6   2  10 245.710 30.1589   9
  -6   2  10 281.986 28.7582  14
  -6   2   9 816.218 59.5352   9
  -6   2   9 831.252 56.0710  14
  -6   2   8 594.809 55.3800   9
  -6   2   8 665.991 58.1915  14
  -6   2   7 279.621 40.9509   9
  -6   2   7 255.447 39.9210  14
  -6   2   6 10327.8 277.089   9
  -6   2   6 10945.9 282.000  14
  -6   2   5 8696.42 216.699  10
  -6   2   5 8546.11 235.845  14
  -6   2   4 7427.95 198.151  10
  -6   2   4 7173.57 207.315  14
  -6   2   3 273.099 116.940   6
  -6   2   3 281.677 35.9403  10
  -6   2   3 438.196 120.311   2
  -6   2   2 14364.8 776.004   6
  -6   2   1 6886.71 505.087   6
  -6   2   0 5369.96 430.757   6
  -6   2  -1 6960.42 496.643   6
  -6   2  -1 6766.26 494.970   3
  -6   2  -2 8414.46 584.396   3
  -6   2  -3 20104.9 981.571   3
  -6   2  -3 20826.7 456.503  16
  -6   2  -3 20851.6 455.552  12
  -6   2  -4 7755.44 231.088  16
  -6   2  -4 7873.74 233.331  12
  -6   2  -5 939.101 73.4110  16
  -6   2  -5 941.981 74.5800  12
  -6   2  -6 4557.23 166.391  16
  -6   2  -6 4268.54 165.917  12
  -6   2  -7 7290.65 215.634  16
  -6   2  -7 6997.42 221.032  12
  -6   2  -8 733.678 55.8123  16
  -6   2  -8 665.342 59.2708  12
  -6   2  -9 1363.00 74.2191  12
  -6   2 -10 137.058 22.7559  12
  -6   3  10 1484.07 66.7767   9
  -6   3   9 443.547 43.4821   9
  -6   3   9 445.438 41.3997  14
  -6   3   8 104.543 29.6041   9
  -6   3   8 145.281 32.5741  14
  -6   3   7 4858.47 170.126   9
  -6   3   7 5199.41 169.522  14
  -6   3   6 4182.69 154.416   9
  -6   3   6 4248.29 152.880  14
  -6   3   5 520.949 51.3532   9
  -6   3   5 491.341 50.9739  14
  -6   3   4 18433.8 386.282  10
  -6   3   4 17962.2 398.825  14
  -6   3   3 16449.0 354.398  10
  -6   3   3 16559.7 361.226  14
  -6   3   2 9136.98 599.606   6
  -6   3   2 9088.06 563.377   2
  -6   3   1 7991.38 534.589   6
  -6   3   1 6787.29 463.094   2
  -6   3   0 887.962 177.704   6
  -6   3  -1 10610.5 613.823   6
  -6   3  -1 10739.9 643.336   3
  -6   3  -2 1383.87 238.643   3
  -6   3  -3 459.235 52.2946  16
  -6   3  -3 468.323 50.3193  12
  -6   3  -4 7097.67 219.849  16
  -6   3  -4 6796.72 216.019  12
  -6   3  -5 1549.75 93.7667  16
  -6   3  -5 1690.88 98.9871  12
  -6   3  -6 3041.59 132.837  16
  -6   3  -6 3020.13 136.560  12
  -6   3  -7 3128.31 129.280  16
  -6   3  -7 3036.36 135.138  12
  -6   3  -8 935.603 62.6328  16
  -6   3  -8 807.888 64.3416  12
  -6   3  -9 208.825 32.7321  12
  -6   3 -10 343.335 32.2355  12
  -6   4  10 410.133 33.4832   9
  -6   4   9 716.870 52.1407   9
  -6   4   9 621.114 46.0988  14
  -6   4   8 511.585 50.0589   9
  -6   4   8 457.391 45.9566  14
  -6   4   7 7412.30 217.936   9
  -6   4   7 7594.25 213.344  14
  -6   4   6 8048.61 232.679   9
  -6   4   6 8382.81 231.173  14
  -6   4   5 19100.1 420.953   9
  -6   4   5 18659.9 413.676  14
  -6   4   4 12129.6 298.703   9
  -6   4   4 12602.4 299.061  14
  -6   4   3 8349.61 215.485  10
  -6   4   3 7982.52 214.274  14
  -6   4   2 1078.63 200.316   6
  -6   4   2 1292.10 73.0112  10
  -6   4   1 6910.89 493.393   6
  -6   4   1 8052.99 204.379  10
  -6   4   1 7468.51 509.429   2
  -6   4   0 39806.1 1302.39   6
  -6   4   0 40548.7 1293.00   2
  -6   4  -1 13762.0 696.439   6
  -6   4  -1 12364.0 717.721   3
  -6   4  -2 10215.7 270.842  16
  -6   4  -2 10124.8 260.512  12
  -6   4  -3 263.302 40.3148  12
  -6   4  -3 301.633 43.8841  16
  -6   4  -4 865.450 70.1722  16
  -6   4  -4 980.721 73.9979  12
  -6   4  -5 2035.73 108.472  16
  -6   4  -5 1770.46 101.816  12
  -6   4  -6 10510.1 284.326  16
  -6   4  -6 10323.9 289.221  12
  -6   4  -7 429.120 51.5624  12
  -6   4  -7 511.781 52.3289  16
  -6   4  -8-18.5595 29.3219  12
  -6   4  -8 3.01285 21.0561  16
  -6   4  -9 14.1211 19.9291  12
  -6   4 -10 1091.29 50.7673  12
  -6   5  10 1920.55 67.2233   9
  -6   5   9 189.455 27.6512   9
  -6   5   8 600.917 51.4778   9
  -6   5   8 664.981 50.7793  14
  -6   5   7 3817.59 141.258   9
  -6   5   7 3930.81 138.424  14
  -6   5   6 4263.76 153.052   9
  -6   5   6 4187.51 147.381  14
  -6   5   5 2173.00 105.488   9
  -6   5   5 2189.50 102.008  14
  -6   5   4 19861.1 436.233   9
  -6   5   4 20566.6 433.067  14
  -6   5   3 11871.3 282.390  14
  -6   5   2 28658.5 560.420  10
  -6   5   1 800.613 60.5364  10
  -6   5   0 1782.51 81.8639  10
  -6   5  -1 1634.13 89.6527  16
  -6   5  -2 1628.95 93.1732  16
  -6   5  -3 5877.85 196.818  16
  -6   5  -3 6025.52 190.509  12
  -6   5  -4 566.592 58.7760  16
  -6   5  -4 567.096 56.9563  12
  -6   5  -5 6533.12 211.614  16
  -6   5  -5 6529.29 212.843  12
  -6   5  -6 1542.65 92.2918  16
  -6   5  -6 1651.07 96.8130  12
  -6   5  -7 1187.62 75.9110  16
  -6   5  -7 1184.71 79.0510  12
  -6   5  -8 153.272 30.1957  12
  -6   5  -8 245.392 33.3840  16
  -6   5  -9 166.732 26.2313  12
  -6   6   9 317.946 32.1959   9
  -6   6   8 27.0657 20.7703   9
  -6   6   7 1608.37 84.1221   9
  -6   6   6 3144.63 126.376   9
  -6   6   6 3103.05 120.508  14
  -6   6   5 15625.1 361.758   9
  -6   6   5 15442.6 353.162  14
  -6   6   4 1943.17 96.4224   9
  -6   6   4 1906.78 92.3261  14
  -6   6  -1 10052.1 266.999  16
  -6   6  -2 802.935 66.2489  16
  -6   6  -3 1857.48 103.148  16
  -6   6  -4 4887.65 178.861  16
  -6   6  -4 4872.95 169.468  12
  -6   6  -5 6111.14 202.888  16
  -6   6  -5 6208.31 200.243  12
  -6   6  -6 490.427 52.3695  12
  -6   6  -6 538.361 56.8677  16
  -6   6  -7 920.638 65.1897  16
  -6   6  -7 901.455 66.3735  12
  -6   6  -8 464.099 41.9371  16
  -6   6  -8 462.875 43.6911  12
  -6   6  -9 382.889 32.7063  12
  -6   7   9 1474.02 59.0427   9
  -6   7   8 718.171 48.2935   9
  -6   7   7 442.344 43.5834   9
  -6   7   6 4018.38 140.960   9
  -6   7   5 7773.62 218.598   9
  -6   7   4 3076.87 124.183   9
  -6   7   3 3660.17 135.131   9
  -6   7  -2 4366.57 162.362  16
  -6   7  -3 3234.75 139.154  16
  -6   7  -4 2753.37 127.322  16
  -6   7  -5 118.496 29.2477  12
  -6   7  -5 121.840 37.2398  16
  -6   7  -6 720.191 61.2713  16
  -6   7  -6 603.826 52.2144  12
  -6   7  -7 7.34101 20.1503  12
  -6   7  -7 31.3649 23.2722  16
  -6   7  -8 1022.25 55.5219  16
  -6   7  -8 960.476 53.7160  12
  -6   8   8 88.3270 19.1220   9
  -6   8   7 175.279 26.3851  11
  -6   8   7 222.259 30.5929   9
  -6   8   6 875.601 60.2831  11
  -6   8   6 889.135 59.4791   9
  -6   8   5 1227.82 76.8556  11
  -6   8   5 1300.33 75.4494   9
  -6   8   4 5597.00 183.460  11
  -6   8   4 5625.21 175.753   9
  -6   8   3 3018.97 120.755   9
  -6   8  -2 4257.51 158.302  16
  -6   8  -3 1361.89 87.0627  16
  -6   8  -4 63.8308 28.8547  16
  -6   8  -5 2381.55 111.373  16
  -6   8  -6 146.402 31.4704  16
  -6   8  -7 1480.00 72.8313  16
  -6   8  -7 1364.47 62.4724  12
  -6   8  -8 79.9058 16.6842  16
  -6   9   7 214.425 26.6776   9
  -6   9   6 40.1050 21.6430   9
  -6   9   5 175.935 31.4052   9
  -6   9   4 176.549 29.5313   7
  -6   9   4 194.086 31.1985   9
  -6   9   3 2533.47 105.124   7
  -6   9   2 1518.21 79.1279   7
  -6   9  -2 698.013 58.0037  16
  -6   9  -3 459.892 48.8671  16
  -6   9  -4 426.765 48.6198  16
  -6   9  -5 877.154 62.8255  16
  -6   9  -6 867.588 56.8866  16
  -6   9  -7 753.376 45.2833  16
  -6  10   6 1456.79 59.0975   7
  -6  10   5 1661.29 70.5883   7
  -6  10   4 190.077 28.7141   7
  -6  10   3 454.273 41.6802   7
  -6  10   2 597.000 47.7691   7
  -6  10   1 169.231 28.2528   7
  -6  10  -3 991.094 63.6076  16
  -6  10  -4 591.957 48.6377  16
  -6  10  -5 60.8187 22.5431  16
  -6  10  -6 1337.75 60.6047  16
  -6  11   4 202.168 24.2788   7
  -6  11   3 1137.81 56.9430   7
  -6  11   2 1427.04 66.3981   7
  -6  11   1 197.993 27.2097   7
  -6  11  -3 2231.63 81.8133  16
  -6  11  -4 548.715 38.8203  16
  -6  12   2 687.000 38.3087   7
  -6  12   1 1415.43 56.9820   7
  -7 -11   3 811.230 42.0610  15
  -7 -11   2 411.452 31.2487  15
  -7 -11   1 350.508 28.3722  15
  -7 -11   0 155.407 20.7097  10
  -7 -11  -1 270.714 26.8181  10
  -7 -11  -2 11.1621 13.4895  10
  -7 -10   5 15.4804 13.6440  14
  -7 -10   4 929.055 50.1843  15
  -7 -10   4 855.176 48.8698  14
  -7 -10   3 174.691 26.8019  15
  -7 -10   2 908.385 55.7494  15
  -7 -10   1-8.41296 18.0228  10
  -7 -10   1 31.8535 20.1635  15
  -7 -10   0 580.060 44.4214  10
  -7 -10   0 495.865 39.5478  15
  -7 -10  -1 592.534 46.1672  10
  -7 -10  -2 6.57122 18.3696  10
  -7 -10  -3 381.404 35.6214  10
  -7 -10  -4 608.611 40.4494  10
  -7  -9   6 870.454 47.6162  14
  -7  -9   5 1493.08 66.5329  15
  -7  -9   5 1345.70 66.6715  14
  -7  -9   4 714.018 50.9605  15
  -7  -9   3 680.472 54.1880  15
  -7  -9   2 188.162 26.5692  10
  -7  -9   2 176.179 32.7819  15
  -7  -9   1 7897.04 204.393  10
  -7  -9   1 7224.55 202.944  15
  -7  -9   0 647.470 53.9079  10
  -7  -9   0 587.335 48.8654  15
  -7  -9  -1 1782.66 88.5478  10
  -7  -9  -2 207.956 34.1886  10
  -7  -9  -3 1095.87 65.9236  10
  -7  -9  -4 1209.91 64.9975  10
  -7  -9  -5 277.433 28.6955  10
  -7  -8   7 240.070 25.6269  14
  -7  -8   6 2481.85 85.6639  15
  -7  -8   6 2414.73 93.6180  14
  -7  -8   5 1337.37 70.2516  15
  -7  -8   5 1267.85 70.9635  14
  -7  -8   4 634.287 53.9156  15
  -7  -8   3 520.207 51.5953  15
  -7  -8   2 88.3441 26.2435  10
  -7  -8   2 62.4966 27.7217  15
  -7  -8   1 2191.59 101.831  10
  -7  -8   1 2283.10 106.169  15
  -7  -8   0 387.323 46.7827  10
  -7  -8   0 410.266 45.0263  15
  -7  -8  -1 320.686 43.8344  10
  -7  -8  -1 284.001 36.2885  15
  -7  -8  -2 727.249 61.4948  10
  -7  -8  -3 1751.17 90.0827  10
  -7  -8  -4 177.079 30.9897  10
  -7  -8  -5 1108.16 60.7275  10
  -7  -8  -6 668.364 38.8098  10
  -7  -7   7 187.580 28.2759  14
  -7  -7   6 1103.10 60.2055  15
  -7  -7   6 1121.54 67.6809  14
  -7  -7   5 5546.39 167.738  15
  -7  -7   5 5258.70 170.997  14
  -7  -7   4 347.681 45.3259  15
  -7  -7   3 217.791 31.9443  10
  -7  -7   3 317.363 45.9618  15
  -7  -7   2 395.323 44.9860  10
  -7  -7   2 420.402 51.6311  15
  -7  -7   1 9924.94 266.838  10
  -7  -7   1 10100.1 271.454  15
  -7  -7   0 2683.89 123.616  10
  -7  -7   0 2679.50 118.171  15
  -7  -7  -1 2528.13 120.806  10
  -7  -7  -1 2615.17 111.682  15
  -7  -7  -2 2247.31 113.445  10
  -7  -7  -3 2253.51 108.128  10
  -7  -7  -4 724.298 58.5665  10
  -7  -7  -5 1338.67 72.0243  10
  -7  -6   8 1363.06 61.8713  14
  -7  -6   7 87.2952 25.6581  14
  -7  -6   6 1049.92 61.8750  15
  -7  -6   6 1046.84 70.6647  14
  -7  -6   5 1309.75 78.3240  15
  -7  -6   5 1227.30 80.4240  14
  -7  -6   4 2147.42 107.341  15
  -7  -6   3 1205.77 72.4977  10
  -7  -6   3 1358.72 88.8759  15
  -7  -6   2 8285.46 232.360  10
  -7  -6   2 8192.94 245.858  15
  -7  -6   1 6528.77 205.722  10
  -7  -6   1 6662.53 210.567  15
  -7  -6   0 4872.97 175.209  10
  -7  -6   0 4924.54 171.619  15
  -7  -6  -1 3486.87 146.051  10
  -7  -6  -1 3442.89 134.879  15
  -7  -6  -2 3932.07 158.202  10
  -7  -6  -2 4566.03 154.833  12
  -7  -6  -3 388.263 49.5921  10
  -7  -6  -3 376.985 44.4058  12
  -7  -6  -4 3293.59 131.778  10
  -7  -6  -5 1338.92 75.0531  10
  -7  -5   8 268.646 33.0009  14
  -7  -5   7 299.778 39.0958  14
  -7  -5   6 4953.46 153.110  15
  -7  -5   6 5217.73 171.562  14
  -7  -5   5 5246.56 172.758  15
  -7  -5   5 5161.91 178.714  14
  -7  -5   4 1721.01 97.9404  15
  -7  -5   3 1227.92 75.5390  10
  -7  -5   3 1318.27 88.5736  15
  -7  -5   2 12595.7 316.185  10
  -7  -5   2 13089.8 331.294  15
  -7  -5   1 1111.98 79.0806  10
  -7  -5   1 1020.73 78.1264  15
  -7  -5   0 4228.60 161.611  10
  -7  -5   0 4194.05 157.710  15
  -7  -5  -1 5248.58 185.591  10
  -7  -5  -1 5015.48 171.623  15
  -7  -5  -1 5302.81 177.982  12
  -7  -5  -2 3035.24 135.475  10
  -7  -5  -2 2904.76 119.030  15
  -7  -5  -2 3077.67 128.148  12
  -7  -5  -3 7041.83 220.042  10
  -7  -5  -3 7098.62 208.903  12
  -7  -5  -4 216.122 39.0474  10
  -7  -5  -4 267.315 37.4284  12
  -7  -5  -5 696.501 56.2683  10
  -7  -5  -5 773.632 56.0448  12
  -7  -4   9 295.653 28.4182  14
  -7  -4   8 189.564 30.7069  14
  -7  -4   7 1425.34 80.8608  14
  -7  -4   6 1731.05 83.2053  15
  -7  -4   6 1802.23 97.1564  14
  -7  -4   5 2332.80 107.991  15
  -7  -4   5 2479.19 117.998  14
  -7  -4   4 9231.16 238.069  10
  -7  -4   4 9357.03 259.240  15
  -7  -4   4 9075.76 259.811  14
  -7  -4   3 5770.67 182.541  10
  -7  -4   3 6115.67 200.199  15
  -7  -4   2 5479.46 182.314  10
  -7  -4   2 5553.98 190.036  15
  -7  -4   1 18375.2 425.085  10
  -7  -4   1 18941.2 430.109  15
  -7  -4   0 9530.68 271.039  10
  -7  -4   0 9556.99 265.742  15
  -7  -4  -1 2804.49 129.444  10
  -7  -4  -1 2683.66 119.516  15
  -7  -4  -1 2922.93 126.443  12
  -7  -4  -2 8546.00 248.254  10
  -7  -4  -2 8099.15 225.990  15
  -7  -4  -2 8568.30 242.749  12
  -7  -4  -3 3176.39 135.883  10
  -7  -4  -3 3340.89 136.185  12
  -7  -4  -4 2684.48 118.653  10
  -7  -4  -4 2436.67 113.126  12
  -7  -4  -5 1597.23 86.6435  12
  -7  -4  -6 860.509 59.0438  12
  -7  -3   9 38.6024 16.6493   9
  -7  -3   9 41.7302 18.4652  14
   7  -3  -9 42.4234 17.7324  23
  -7  -3   8 497.785 44.9664  14
   7  -3  -8 480.396 42.8507  23
  -7  -3   7 291.024 42.1519  14
  -7  -3   6 3006.21 130.518  14
  -7  -3   5 1030.73 69.8675  15
  -7  -3   5 1105.04 79.8010  14
  -7  -3   4 16942.1 378.865  10
  -7  -3   4 17822.1 399.732  15
  -7  -3   4 16945.3 402.425  14
  -7  -3   3 9780.13 258.974  10
  -7  -3   3 10018.3 269.988  15
  -7  -3   3 9620.92 264.870  14
  -7  -3   2 3735.48 142.720  10
  -7  -3   2 3598.52 144.738  15
  -7  -3   1 4554.88 162.496  10
  -7  -3   1 4183.46 157.783  15
  -7  -3   1 4440.64 159.501  12
  -7  -3   0 158.842 35.8661  10
  -7  -3   0 160.294 30.4829  15
  -7  -3  -1 4209.28 159.688  10
  -7  -3  -1 4329.23 154.023  15
  -7  -3  -1 4566.21 162.615  12
  -7  -3  -2 7185.86 220.754  10
  -7  -3  -2 7346.05 208.878  15
  -7  -3  -2 7600.26 224.612  12
  -7  -3  -3 10585.9 283.334  10
  -7  -3  -3 11242.7 291.114  12
  -7  -3  -4 10511.9 274.376  10
  -7  -3  -4 11027.2 285.382  12
  -7  -3  -5 509.056 52.3864  12
  -7  -3  -6 669.192 56.7925  12
  -7  -3  -7 51.5093 23.2891  12
  -7  -2   9 18.1187 15.8103   9
  -7  -2   9 31.9240 19.1389  14
   7  -2  -9 37.4805 18.1717  23
  -7  -2   8 586.449 50.8598  14
   7  -2  -8 567.390 49.3529  23
  -7  -2   7 641.590 59.0575  14
  -7  -2   6 3024.91 130.636  14
  -7  -2   5 4642.72 146.268  10
  -7  -2   5 4541.01 152.843  15
  -7  -2   5 4676.51 169.084  14
  -7  -2   4 3352.64 126.543  10
  -7  -2   4 3270.59 130.676  15
  -7  -2   4 3124.06 133.713  14
  -7  -2   3 5303.57 171.710  10
  -7  -2   3 5279.42 176.247  15
  -7  -2   3 5105.79 172.820  14
  -7  -2   2 61.1722 24.9838  10
  -7  -2   2 45.3603 30.5208  15
  -7  -2   2 139.652 34.7619  12
  -7  -2   1 779.480 62.3470  10
  -7  -2   1 750.836 60.2655  15
  -7  -2   1 820.566 64.2051  12
  -7  -2   0 9307.89 255.218  10
  -7  -2   0 9282.98 251.930  15
  -7  -2   0 9327.85 254.947  12
  -7  -2  -1 2083.82 104.396  10
  -7  -2  -1 2026.88 98.7728  15
  -7  -2  -1 2134.98 106.114  12
  -7  -2  -2 795.705 64.7310  10
  -7  -2  -2 885.729 62.4139  15
  -7  -2  -2 850.980 68.1617  12
  -7  -2  -3 1143.40 74.9048  10
  -7  -2  -3 1157.16 68.8938  15
  -7  -2  -3 1166.99 81.1989  12
  -7  -2  -4 2101.46 107.836  12
  -7  -2  -5 431.296 50.2295  12
  -7  -2  -6 2938.07 124.079  12
  -7  -2  -7 1291.31 75.0444  12
  -7  -2  -8 12.2717 17.2803  12
  -7  -1   9 154.541 25.3802   9
  -7  -1   9 220.955 29.0984  14
   7  -1  -9 172.590 29.3679  23
  -7  -1   8 1745.33 84.8518   9
  -7  -1   8 1877.79 89.6151  14
  -7  -1   7 592.947 56.6184  14
  -7  -1   6 2596.40 119.006  14
  -7  -1   5 7427.11 199.923  10
  -7  -1   5 7281.66 222.397  14
  -7  -1   4 1569.69 83.7327  10
  -7  -1   4 1388.56 80.4759  15
  -7  -1   4 1359.62 84.2265  14
  -7  -1   3 2923.89 121.306  10
  -7  -1   3 2887.88 120.877  15
  -7  -1   3 3003.16 123.283  14
  -7  -1   2 14915.0 347.172  10
  -7  -1   2 14078.2 341.399  15
  -7  -1   2 14743.1 343.865  12
  -7  -1   1 2497.42 112.720  10
  -7  -1   1 2477.73 110.865  15
  -7  -1   1 2461.02 111.005  12
  -7  -1   0 2432.09 111.168  10
  -7  -1   0 2502.68 111.250  15
  -7  -1   0 2570.24 113.976  12
  -7  -1  -1 16056.4 369.607  10
  -7  -1  -1 15847.3 362.687  15
  -7  -1  -1 16060.6 375.378  12
  -7  -1  -2 290.261 42.8593  12
  -7  -1  -2 300.222 38.3070  10
  -7  -1  -2 312.554 39.4396  15
  -7  -1  -3 1833.26 91.5432  10
  -7  -1  -3 1946.55 89.6051  15
  -7  -1  -3 1756.23 98.6175  12
  -7  -1  -4 185.901 39.3768  12
  -7  -1  -5 474.382 54.0860  12
  -7  -1  -6 4736.04 167.961  12
  -7  -1  -7 5087.83 165.858  12
  -7  -1  -8 1609.59 77.4735  12
  -7  -1  -9 119.215 19.1232  12
  -7   0   9 1401.40 67.1701   9
  -7   0   9 1451.18 67.8800  14
   7   0  -9 1593.18 77.2287  23
  -7   0   8 1659.01 82.5931   9
  -7   0   8 1812.97 86.6260  14
  -7   0   7 2715.92 114.639   9
  -7   0   7 3008.59 123.806  14
  -7   0   6 1930.35 85.9548  10
  -7   0   6 1806.60 98.3476  14
  -7   0   5 6274.90 179.113  10
  -7   0   5 5947.82 193.834  14
  -7   0   4 3741.29 137.493  10
  -7   0   4 4119.91 142.261  15
  -7   0   4 4093.44 149.873  14
  -7   0   3 11000.9 274.087  10
  -7   0   3 10476.5 271.065  15
  -7   0   3 10707.7 272.252  14
  -7   0   2-2.37266 21.9202  10
  -7   0   2-5.42388 25.2360  15
  -7   0   1 10598.1 270.405  10
  -7   0   1 10661.2 269.976  15
  -7   0   1 10157.9 266.499  12
  -7   0   0 180.872 34.0731  12
  -7   0   0 183.140 33.6617  10
  -7   0   0 258.226 40.0911  15
  -7   0  -1 1354.51 78.8008  10
  -7   0  -1 1348.37 78.5064  15
  -7   0  -1 1247.87 79.3823  12
  -7   0  -2 3167.50 124.311  10
  -7   0  -2 3433.28 125.789  15
  -7   0  -2 3276.66 135.856  12
  -7   0  -3 340.968 46.2847  12
  -7   0  -4 3555.68 146.085  12
  -7   0  -5 7985.09 238.791  12
  -7   0  -6 6119.42 199.179  12
  -7   0  -7 72.7664 29.6086  12
  -7   0  -8 1837.51 85.1936  12
  -7   0  -9 597.565 39.5968  12
  -7   1   9 176.071 26.5516   9
  -7   1   9 179.574 26.7869  14
  -7   1   8 1874.71 87.7154   9
  -7   1   8 2005.10 90.9805  14
  -7   1   7 494.005 48.1619   9
  -7   1   7 599.497 56.9118  14
  -7   1   6 2533.94 110.980   9
  -7   1   6 2572.14 116.630  14
  -7   1   5 7907.20 207.593  10
  -7   1   5 7320.21 219.521  14
  -7   1   4 1402.17 81.0412  10
  -7   1   4 1420.14 77.1333  15
  -7   1   4 1372.19 81.0181  14
  -7   1   3 2729.96 115.518  10
  -7   1   3 2897.50 115.800  15
  -7   1   2 14814.2 343.373  10
  -7   1   2 14808.9 341.811  15
  -7   1   1 2460.92 107.773  10
  -7   1   1 2585.79 109.874  15
  -7   1   1 2400.43 106.107  12
  -7   1   0 2557.07 110.144  10
  -7   1   0 2448.56 109.488  12
  -7   1  -1 16125.3 361.848  10
  -7   1  -1 15467.3 370.788  12
  -7   1  -2 350.629 44.8325  12
  -7   1  -2 359.472 40.9451  10
  -7   1  -2 365.454 46.6533  16
  -7   1  -3 1809.27 100.274  16
  -7   1  -3 1610.40 95.1347  12
  -7   1  -4 252.374 43.8585  12
  -7   1  -4 272.596 45.4189  16
  -7   1  -5 425.942 52.3355  12
  -7   1  -5 506.151 56.9008  16
  -7   1  -6 4908.12 174.239  12
  -7   1  -7 4934.26 167.326  12
  -7   1  -8 1514.62 78.1943  12
  -7   1  -9 206.216 27.1918  12
  -7   2   9 23.2259 16.1136   9
  -7   2   9 17.0839 18.2347  14
  -7   2   8 562.797 47.1257   9
  -7   2   8 612.507 49.3418  14
  -7   2   7 617.090 52.7376   9
  -7   2   7 682.139 55.7199  14
  -7   2   6 2922.82 119.458   9
  -7   2   6 3097.00 126.045  14
  -7   2   5 5215.07 157.978  10
  -7   2   5 4862.04 165.854  14
  -7   2   4 3490.45 126.094  10
  -7   2   4 3023.89 125.027  14
  -7   2   3 5307.02 170.047  10
  -7   2   3 5821.11 172.200  15
  -7   2   2 102.246 31.6233  10
  -7   2   2 176.558 38.9523  15
  -7   2   1 801.946 61.5995  10
  -7   2   1 1039.35 71.8874  15
  -7   2   0 9247.23 240.650  10
  -7   2   0 8641.27 239.090  12
  -7   2  -1 2145.50 95.7089  10
  -7   2  -1 2075.06 103.185  16
  -7   2  -1 2114.79 101.239  12
  -7   2  -2 845.088 67.3922  16
  -7   2  -2 794.397 64.4830  12
  -7   2  -3 1211.62 82.6260  16
  -7   2  -3 1168.03 80.9169  12
  -7   2  -4 2018.05 108.684  16
  -7   2  -4 1957.95 107.090  12
  -7   2  -5 430.006 53.9053  12
  -7   2  -5 544.387 58.4303  16
  -7   2  -6 3010.41 129.139  16
  -7   2  -6 2778.93 127.279  12
  -7   2  -7 1224.97 77.1639  12
  -7   2  -8 3.20559 21.3317  12
  -7   2  -9 536.021 39.3387  12
  -7   3   9 35.8371 16.8368   9
  -7   3   9 38.2278 16.5996  14
  -7   3   8 511.491 43.6870   9
  -7   3   8 519.353 44.9286  14
  -7   3   7 298.861 37.6922   9
  -7   3   7 311.916 40.0494  14
  -7   3   6 2780.95 114.887   9
  -7   3   6 2954.83 119.442  14
  -7   3   5 1076.48 71.7248  14
  -7   3   4 18960.8 398.565  10
  -7   3   4 18056.4 402.352  14
  -7   3   3 10352.8 257.147  10
  -7   3   2 3830.78 135.386  10
  -7   3   1 4152.72 141.108  10
  -7   3   0 186.717 33.4128  10
  -7   3  -1 4423.32 140.601  10
  -7   3  -1 4327.12 156.657  16
  -7   3  -1 4250.01 149.798  12
  -7   3  -2 7052.07 216.942  16
  -7   3  -2 6951.50 209.568  12
  -7   3  -3 10556.9 287.571  16
  -7   3  -3 10433.9 282.247  12
  -7   3  -4 10564.0 288.838  16
  -7   3  -4 10173.2 283.254  12
  -7   3  -5 597.958 61.1790  16
  -7   3  -5 561.985 59.8699  12
  -7   3  -6 716.630 63.1664  16
  -7   3  -6 663.205 62.0900  12
  -7   3  -7 1.82835 24.0501  12
  -7   3  -7 27.4333 23.1661  16
  -7   3  -8 776.090 54.8567  12
  -7   3  -9 52.4254 18.4560  12
  -7   4   9 262.662 26.2305   9
  -7   4   8 169.555 26.3800   9
  -7   4   8 147.092 26.3727  14
  -7   4   7 1547.93 78.8667   9
  -7   4   7 1667.65 81.0935  14
  -7   4   6 1794.33 89.2366   9
  -7   4   6 2005.90 93.6126  14
  -7   4   5 2341.48 103.447  14
  -7   4   4 9279.28 240.270  14
  -7   4   3 6351.96 184.122  10
  -7   4   2 5841.10 175.030  10
  -7   4   1 18900.7 400.961  10
  -7   4   0 9847.91 243.063  10
  -7   4  -1 2994.32 109.276  10
  -7   4  -1 2763.59 121.409  16
  -7   4  -2 8154.66 237.750  16
  -7   4  -2 7849.06 224.168  12
  -7   4  -3 3230.01 139.227  16
  -7   4  -3 2938.87 128.734  12
  -7   4  -4 2731.31 127.042  16
  -7   4  -4 2536.25 122.161  12
  -7   4  -5 1571.91 92.9862  16
  -7   4  -5 1577.75 93.7275  12
  -7   4  -6 772.718 64.4049  16
  -7   4  -6 756.960 64.1326  12
  -7   4  -7 1074.65 67.1082  16
  -7   4  -7 1121.28 70.5339  12
  -7   4  -8 409.077 40.3845  12
  -7   4  -9 116.226 19.4595  12
  -7   5   8 225.076 27.3025   9
  -7   5   7 301.901 35.2331   9
  -7   5   6 5213.01 161.088   9
  -7   5   6 5489.66 162.524  14
  -7   5   5 5216.43 163.624   9
  -7   5   5 5472.75 164.904  14
  -7   5   4 1858.48 88.2190  14
  -7   5   1 1494.92 81.4678  10
  -7   5   0 4729.30 146.945  10
  -7   5  -1 4690.25 163.240  16
  -7   5  -2 2820.79 127.513  16
  -7   5  -3 6801.45 214.126  16
  -7   5  -3 6633.66 202.185  12
  -7   5  -4 221.630 38.5499  12
  -7   5  -4 225.698 43.1549  16
  -7   5  -5 707.195 64.8295  16
  -7   5  -5 648.811 58.8633  12
  -7   5  -6 442.446 49.3694  12
  -7   5  -6 457.089 49.9685  16
  -7   5  -7 423.184 43.3512  16
  -7   5  -7 422.855 43.6941  12
  -7   5  -8 684.511 46.2218  12
  -7   6   8 1279.19 57.0981   9
  -7   6   7 57.8190 21.3032   9
  -7   6   6 1160.65 66.0362   9
  -7   6   5 1282.49 71.2018   9
  -7   6  -2 3885.51 150.189  16
  -7   6  -3 358.740 47.7243  16
  -7   6  -4 3558.25 142.799  16
  -7   6  -5 1325.10 82.6416  16
  -7   6  -5 1294.80 76.9793  12
  -7   6  -6 859.476 63.0999  16
  -7   6  -6 940.360 61.7488  12
  -7   6  -7 123.688 24.3477  12
  -7   6  -7 118.535 25.4366  16
  -7   6  -8 376.958 30.6419  12
  -7   7   7 226.752 27.1819   9
  -7   7   6 1190.60 62.9473   9
  -7   7   5 5192.75 153.448   9
  -7   7  -2 2168.86 105.269  16
  -7   7  -3 2388.34 111.667  16
  -7   7  -4 765.949 62.9782  16
  -7   7  -5 1480.07 83.1509  16
  -7   7  -6 1083.30 65.7773  16
  -7   7  -6 1111.50 58.0340  12
  -7   7  -7 1171.11 58.7158  16
  -7   7  -7 1025.11 49.9013  12
  -7   8   6 2751.57 92.2437   9
  -7   8   5 1415.08 67.2982   9
  -7   8  -2 732.489 56.9490  16
  -7   8  -3 1889.34 93.0815  16
  -7   8  -4 261.663 37.2408  16
  -7   8  -5 1251.05 70.2935  16
  -7   8  -6 774.814 49.8584  16
  -7   9  -3 1066.25 62.3818  16
  -7   9  -4 1339.56 68.7118  16
  -7   9  -5 319.809 33.7462  16
  -7   9  -6 704.980 40.3640  16
  -7  10  -4 589.909 37.5241  16
  -8  -9   4 1384.37 56.3131  15
  -8  -9   3 153.548 23.0069  15
  -8  -9   2 151.397 24.2795  15
  -8  -9   1 188.724 24.6765  10
  -8  -9   1 187.850 24.9596  15
  -8  -9   0 148.127 24.6920  10
  -8  -9   0 152.549 22.8248  15
  -8  -9  -1 619.548 43.7398  10
  -8  -9  -2 213.255 27.2989  10
  -8  -9  -3 59.3009 17.3607  10
  -8  -8   5 1258.76 54.0052  15
  -8  -8   5 1302.49 56.6207  14
  -8  -8   4 157.246 24.8654  15
  -8  -8   4 157.727 24.4975  14
  -8  -8   3 342.424 35.0084  15
  -8  -8   3 406.795 35.5870  14
  -8  -8   2 62.6895 19.7432  10
  -8  -8   2 43.6794 20.4715  15
  -8  -8   1 1512.74 73.3586  10
  -8  -8   1 1379.57 71.6190  15
  -8  -8   0 575.690 48.1253  10
  -8  -8   0 557.006 44.0204  15
  -8  -8  -1 22.1116 22.2362  10
  -8  -8  -1 7.68607 16.6760  15
  -8  -8  -2 335.537 36.8521  10
  -8  -8  -3 778.844 51.8826  10
  -8  -8  -4 444.505 35.2965  10
  -8  -7   6 2289.79 79.4201  14
  -8  -7   5 1038.74 55.3374  15
  -8  -7   5 1109.21 59.5146  14
  -8  -7   4 2205.99 91.6641  15
  -8  -7   4 2100.10 88.9601  14
  -8  -7   3 208.840 26.9110  10
  -8  -7   3 210.661 33.6582  15
  -8  -7   3 198.012 29.4753  14
  -8  -7   2 3348.88 115.896  10
  -8  -7   2 3122.97 122.912  15
  -8  -7   1 2519.77 105.220  10
  -8  -7   1 2567.44 108.121  15
  -8  -7   0 1594.11 85.9744  10
  -8  -7   0 1531.96 79.3351  15
  -8  -7  -1 217.148 36.7062  10
  -8  -7  -1 195.468 29.9096  15
  -8  -7  -2 2157.88 99.7208  10
  -8  -7  -3 131.514 28.4221  10
  -8  -7  -4 1001.05 57.6828  10
  -8  -7  -5 232.822 24.9249  10
  -8  -6   7 2297.38 76.7679  14
  -8  -6   6 386.236 30.7430  15
  -8  -6   6 447.402 38.7811  14
  -8  -6   5 2851.15 103.087  15
  -8  -6   5 2797.12 106.507  14
  -8  -6   4 1898.26 90.8000  15
  -8  -6   4 1913.14 89.9921  14
  -8  -6   3 1210.69 65.4048  10
  -8  -6   3 1158.23 74.3874  15
  -8  -6   3 1156.88 69.5908  14
  -8  -6   2 285.668 37.8001  10
  -8  -6   2 184.563 35.9927  15
  -8  -6   1 2424.26 109.608  10
  -8  -6   1 2483.76 112.644  15
  -8  -6   0 2824.87 120.476  10
  -8  -6   0 2418.27 109.015  15
  -8  -6  -1 2019.83 103.007  10
  -8  -6  -1 1851.90 89.0501  15
  -8  -6  -2 701.634 61.2582  10
  -8  -6  -3 2096.79 97.5557  10
  -8  -6  -4 1757.16 83.2240  10
  -8  -6  -5 755.723 45.4255  10
  -8  -5   7 883.806 50.0894  14
  -8  -5   6 1604.00 66.5635  15
  -8  -5   6 1817.83 81.3566  14
  -8  -5   5 1440.01 74.1476  15
  -8  -5   5 1549.98 81.9618  14
  -8  -5   4 1395.67 67.6700  10
  -8  -5   4 1353.40 78.4717  15
  -8  -5   4 1284.00 77.2269  14
  -8  -5   3 130.617 28.5414  10
  -8  -5   3 137.095 32.1406  15
  -8  -5   3 123.948 31.2519  14
  -8  -5   2 698.903 57.6188  10
  -8  -5   2 644.757 60.0565  15
  -8  -5   1 1083.90 75.3761  10
  -8  -5   1 952.636 70.7141  15
  -8  -5   0 714.912 63.7591  10
  -8  -5   0 675.403 59.6747  15
  -8  -5  -1 281.923 44.6451  10
  -8  -5  -1 209.775 35.7709  15
  -8  -5  -2 3579.50 142.201  10
  -8  -5  -2 3368.16 121.696  15
  -8  -5  -2 3443.43 132.091  12
  -8  -5  -3 1119.44 73.5531  10
  -8  -5  -3 1126.91 69.6751  12
  -8  -5  -4 2338.75 100.411  10
  -8  -5  -4 2437.67 98.5985  12
  -8  -5  -5 1875.13 78.6505  12
  -8  -4   8 723.290 39.9121  14
  -8  -4   7 976.407 56.2082  14
  -8  -4   6 821.707 57.9291  14
  -8  -4   5 1890.27 87.3584  15
  -8  -4   5 1976.90 95.7964  14
  -8  -4   4 258.320 33.9265  10
  -8  -4   4 175.889 33.2961  15
  -8  -4   4 230.963 36.1350  14
  -8  -4   3 3185.57 122.388  10
  -8  -4   3 3409.26 136.380  15
  -8  -4   2 214.903 38.5684  10
  -8  -4   2 210.642 40.9613  15
  -8  -4   1 1538.46 92.2781  10
  -8  -4   1 1547.76 91.9524  15
  -8  -4   0 4478.58 165.642  10
  -8  -4   0 4246.08 156.998  15
  -8  -4  -1 2099.21 109.602  10
  -8  -4  -1 2197.79 104.200  15
  -8  -4  -1 2352.73 112.239  12
  -8  -4  -2 2557.10 120.405  10
  -8  -4  -2 2427.38 104.681  15
  -8  -4  -2 2691.08 117.307  12
  -8  -4  -3 190.118 37.1218  10
  -8  -4  -3 228.355 39.5062  12
  -8  -4  -4 1538.84 82.0973  10
  -8  -4  -4 1734.85 87.1092  12
  -8  -4  -5 961.205 60.3526  12
  -8  -4  -6 430.861 36.2641  12
  -8  -3   8 1119.81 53.6961  14
  -8  -3   7 106.526 25.6849  14
  -8  -3   6 194.890 35.0523  14
  -8  -3   5 398.942 38.0309  10
  -8  -3   5 420.995 42.9876  15
  -8  -3   5 404.161 46.6672  14
  -8  -3   4 1055.83 63.8233  10
  -8  -3   4 1060.04 70.2656  15
  -8  -3   4 1024.91 70.9121  14
  -8  -3   3 158.688 33.6984  10
  -8  -3   3 105.914 32.1664  15
  -8  -3   2 472.751 50.5561  10
  -8  -3   2 364.870 46.5586  15
  -8  -3   1 4111.36 156.396  10
  -8  -3   1 4220.47 157.285  15
  -8  -3   0 11919.4 312.190  10
  -8  -3   0 11952.1 306.406  15
  -8  -3   0 12496.5 313.058  12
  -8  -3  -1 600.133 59.9870  10
  -8  -3  -1 615.840 58.6629  15
  -8  -3  -1 592.583 59.7281  12
  -8  -3  -2 6520.59 205.055  10
  -8  -3  -2 6647.64 190.785  15
  -8  -3  -2 6369.87 203.676  12
  -8  -3  -3 6058.36 192.578  10
  -8  -3  -3 6654.04 201.743  12
  -8  -3  -4 20.6109 25.3051  12
  -8  -3  -4-4.49434 24.5832  10
  -8  -3  -5 483.917 47.3844  12
  -8  -3  -6 832.761 54.6467  12
  -8  -3  -7 874.712 47.5265  12
  -8  -2   8 210.318 26.6875  14
  -8  -2   7 338.274 38.4070  14
  -8  -2   6 338.808 41.1944  14
  -8  -2   5 767.078 52.6121  10
  -8  -2   5 703.009 52.7405  15
  -8  -2   5 753.518 60.7967  14
  -8  -2   4 1065.11 65.8628  10
  -8  -2   4 1022.89 68.8972  15
  -8  -2   4 1063.92 71.4253  14
  -8  -2   3 175.795 37.3968  10
  -8  -2   3 135.348 32.6195  15
  -8  -2   2 3671.76 140.146  10
  -8  -2   2 3568.88 141.246  15
  -8  -2   1 1188.41 78.9639  10
  -8  -2   1 1085.80 76.8911  15
  -8  -2   1 1153.04 78.4942  12
  -8  -2   0 2773.02 123.374  10
  -8  -2   0 2760.57 122.122  15
  -8  -2   0 2736.71 122.651  12
  -8  -2  -1 18667.6 424.381  10
  -8  -2  -1 18824.0 415.095  15
  -8  -2  -1 18690.1 428.006  12
  -8  -2  -2 6304.73 198.480  10
  -8  -2  -2 6377.20 187.764  15
  -8  -2  -2 6388.90 203.788  12
  -8  -2  -3 4077.47 145.956  10
  -8  -2  -3 4123.28 155.590  12
  -8  -2  -4 1178.57 79.1750  12
  -8  -2  -5 590.114 55.8586  12
  -8  -2  -6 3775.47 130.744  12
  -8  -2  -7 1273.10 63.4383  12
  -8  -1   8 1264.83 60.4199  14
  -8  -1   7 397.709 41.0151  14
  -8  -1   6 565.316 51.3802  14
  -8  -1   5 1712.33 80.0264  10
  -8  -1   5 1677.35 79.2389  15
  -8  -1   5 1631.47 87.9582  14
  -8  -1   4 1466.09 78.0701  10
  -8  -1   4 1592.81 83.7888  15
  -8  -1   4 1431.14 81.6047  14
  -8  -1   3 6679.48 195.785  10
  -8  -1   3 6442.28 196.228  15
  -8  -1   2 2128.59 102.719  10
  -8  -1   2 2044.85 103.185  15
  -8  -1   1 3795.60 145.772  10
  -8  -1   1 3936.65 148.028  15
  -8  -1   1 3985.23 148.685  12
  -8  -1   0 5782.20 186.692  10
  -8  -1   0 5841.66 186.074  15
  -8  -1   0 6008.46 192.560  12
  -8  -1  -1 4654.48 162.570  10
  -8  -1  -1 5010.85 163.078  15
  -8  -1  -1 4556.26 165.768  12
  -8  -1  -2 8607.19 236.966  10
  -8  -1  -2 9012.23 234.414  15
  -8  -1  -2 8511.88 247.124  12
  -8  -1  -3 443.836 52.0704  12
  -8  -1  -3 505.577 48.8187  10
  -8  -1  -4 1536.98 91.1711  12
  -8  -1  -5 2330.83 109.395  12
  -8  -1  -6 3478.05 128.606  12
  -8  -1  -7 334.669 36.4965  12
  -8  -1  -8 468.640 32.2558  12
  -8   0   8 1732.22 71.2386  14
  -8   0   7 28.4989 24.0349  14
  -8   0   6 8.01356 22.7345  14
  -8   0   5 4558.81 138.482  10
  -8   0   5 3964.18 143.136  14
  -8   0   4 6552.91 185.063  10
  -8   0   4 6338.50 183.276  15
  -8   0   4 6010.78 184.998  14
  -8   0   3 103.892 31.9255  10
  -8   0   3 253.869 44.6050  15
  -8   0   2 29164.5 591.292  10
  -8   0   2 29213.8 590.987  15
  -8   0   1 1584.75 89.6249  10
  -8   0   1 1713.11 93.3497  15
  -8   0   1 1598.19 89.0157  12
  -8   0   0 56.2610 28.7860  10
  -8   0   0 44.3837 25.8827  12
  -8   0  -1 14442.4 345.613  10
  -8   0  -1 14267.1 354.582  12
  -8   0  -2 2815.28 116.591  10
  -8   0  -2 2912.70 129.316  12
  -8   0  -3-19.2001 34.1380  12
  -8   0  -4 254.493 41.1067  12
  -8   0  -5 2723.39 121.737  12
  -8   0  -6 123.688 33.5099  12
  -8   0  -7 3615.42 122.330  12
  -8   0  -8 6.36379 14.0399  12
  -8   1   8 1243.42 58.3233  14
  -8   1   7 410.338 39.9438  14
  -8   1   6 602.464 50.1439  14
  -8   1   5 1883.51 86.2794  10
  -8   1   5 1545.66 82.9169  14
  -8   1   4 1748.77 87.3139  10
  -8   1   4 1435.41 78.2018  14
  -8   1   3 6666.69 196.940  10
  -8   1   3 6924.19 197.333  15
  -8   1   2 1906.43 97.6746  10
  -8   1   2 2284.92 105.225  15
  -8   1   1 3994.46 145.131  10
  -8   1   1 4161.04 149.702  15
  -8   1   1 3801.74 139.902  12
  -8   1   0 5896.10 182.939  10
  -8   1   0 5500.17 182.011  12
  -8   1  -1 4612.69 154.027  10
  -8   1  -1 4388.27 159.793  12
  -8   1  -2 8685.21 225.691  10
  -8   1  -2 8410.90 242.652  12
  -8   1  -3 508.324 54.4365  12
  -8   1  -4 1613.25 92.5171  12
  -8   1  -5 2504.04 115.695  12
  -8   1  -6 3366.85 129.121  12
  -8   1  -7 376.692 39.9513  12
  -8   1  -8 510.325 36.6993  12
  -8   2   8 269.554 28.7906  14
  -8   2   7 351.713 35.9269  14
  -8   2   6 379.083 40.6569  14
  -8   2   5 712.345 54.8752  14
  -8   2   4 1215.56 76.0969  10
  -8   2   3 169.531 40.3698  10
  -8   2   2 3624.01 134.958  10
  -8   2   1 1148.02 73.0381  10
  -8   2   0 2553.06 108.755  10
  -8   2   0 2610.26 112.139  12
  -8   2  -1 17620.8 381.798  10
  -8   2  -1 17535.0 397.145  12
  -8   2  -2 6140.52 194.983  12
  -8   2  -3 4023.34 153.267  12
  -8   2  -4 1265.18 82.1628  12
  -8   2  -5 615.644 59.2748  12
  -8   2  -6 3785.44 136.282  12
  -8   2  -7 1320.65 69.4347  12
  -8   2  -8 1047.15 51.6033  12
  -8   3   7 97.9095 22.1000  14
  -8   3   6 212.000 31.9192  14
  -8   3   5 382.588 40.8601  14
  -8   3   3 284.387 48.9469  10
  -8   3   2 542.329 57.0093  10
  -8   3   1 4253.03 143.644  10
  -8   3   0 11781.8 280.995  10
  -8   3  -1 588.922 50.8660  10
  -8   3  -1 530.849 51.6886  12
  -8   3  -2 5963.80 188.142  12
  -8   3  -3 6531.01 204.676  16
  -8   3  -3 6197.26 196.827  12
  -8   3  -4 42.8810 26.8362  12
  -8   3  -4 111.754 35.3704  16
  -8   3  -5 539.526 52.2501  12
  -8   3  -6 828.222 59.2859  12
  -8   3  -7 905.688 55.6090  12
  -8   3  -8 1224.37 54.1477  12
  -8   4   6 862.866 52.7217  14
  -8   4   5 1845.78 80.5048  14
  -8   4   2 455.295 56.1683  10
  -8   4   1 1800.14 89.5296  10
  -8   4   0 4435.60 142.007  10
  -8   4  -1 2317.14 93.0791  10
  -8   4  -2 2468.24 114.108  16
  -8   4  -3 245.934 37.5184  12
  -8   4  -3 209.362 41.4580  16
  -8   4  -4 1804.52 94.8676  16
  -8   4  -4 1611.35 88.1554  12
  -8   4  -5 917.441 67.1323  16
  -8   4  -5 921.742 63.6795  12
  -8   4  -6 373.100 39.9891  12
  -8   4  -7 341.303 33.3932  12
  -8   5  -2 3357.89 132.472  16
  -8   5  -3 1034.12 71.9750  16
  -8   5  -4 2273.12 105.001  16
  -8   5  -4 2291.43 98.4824  12
  -8   5  -5 1952.24 91.3142  16
  -8   5  -5 1951.24 87.7744  12
  -8   5  -6 906.728 53.7523  12
  -8   5  -7 508.462 35.3236  12
  -8   6  -2 701.245 55.8479  16
  -8   6  -3 2210.20 100.130  16
  -8   6  -4 1901.87 89.9936  16
  -8   6  -5 924.051 59.1387  16
  -8   6  -6 239.609 25.5428  12
  -8   7  -2 2195.18 92.2275  16
  -8   7  -3 137.563 28.3773  16
  -8   7  -4 1079.05 63.3343  16
  -8   7  -5 265.804 31.7033  16
  -8   8  -3 759.451 48.6013  16
  -8   8  -4 547.367 39.7360  16
  -9  -8   1 741.925 39.0095  15
  -9  -8   0 406.705 30.8238  10
  -9  -8  -1 71.0291 16.5183  10
  -9  -7   3 301.212 29.5639  15
  -9  -7   2 364.601 29.0162  10
  -9  -7   2 260.749 28.9271  15
  -9  -7   1 15.8630 16.3980  10
  -9  -7   1-4.74678 15.9248  15
  -9  -7   0 466.515 38.0386  10
  -9  -7   0 483.064 35.7946  15
  -9  -7  -1 195.344 26.7980  10
  -9  -7  -1 259.999 25.3522  15
  -9  -7  -2 171.202 24.7359  10
  -9  -7  -3 356.485 29.1671  10
  -9  -6   4 259.411 27.8806  15
  -9  -6   3 921.951 45.8704  10
  -9  -6   3 986.391 55.4194  15
  -9  -6   2 1659.66 70.0680  10
  -9  -6   2 1547.82 73.5492  15
  -9  -6   1 428.298 39.0664  10
  -9  -6   1 430.938 39.8570  15
  -9  -6   0 277.002 34.5962  10
  -9  -6   0 284.987 32.6235  15
  -9  -6  -1 786.535 53.6277  10
  -9  -6  -1 877.420 49.1898  15
  -9  -6  -2 415.391 38.2746  10
  -9  -6  -3 118.065 21.7608  10
  -9  -5   5 919.103 45.0157  15
  -9  -5   4 824.998 41.3472  10
  -9  -5   4 887.453 52.1752  15
  -9  -5   3 621.577 41.9438  10
  -9  -5   3 574.653 46.7798  15
  -9  -5   2 189.231 30.2217  10
  -9  -5   2 166.845 31.2830  15
  -9  -5   1 1641.45 80.7295  10
  -9  -5   1 1676.12 81.7304  15
  -9  -5   0 133.213 30.5754  10
  -9  -5   0 157.600 29.4809  15
  -9  -5  -1 1279.79 72.8068  10
  -9  -5  -1 1343.27 66.7961  15
  -9  -5  -2-1.92262 22.4544  10
  -9  -5  -2 171.911 25.9365  15
  -9  -5  -3 143.839 25.6219  10
  -9  -5  -4 791.339 43.8016  10
  -9  -4   5 1645.25 63.9974  15
  -9  -4   5 1464.24 63.7268  14
  -9  -4   4 94.7145 21.4653  10
  -9  -4   4 117.850 28.0658  15
  -9  -4   3 986.662 56.9609  10
  -9  -4   3 1073.96 65.5182  15
  -9  -4   2 155.510 29.5499  10
  -9  -4   2 181.183 34.1432  15
  -9  -4   1 3.88263 21.9215  10
  -9  -4   1 28.8947 25.8506  15
  -9  -4   0 1379.71 79.4585  10
  -9  -4   0 1299.99 73.8955  15
  -9  -4  -1 375.288 44.5611  10
  -9  -4  -1 444.626 43.6449  15
  -9  -4  -2 480.339 45.7232  10
  -9  -4  -3 1129.30 63.7116  10
  -9  -4  -3 1325.52 69.3776  12
  -9  -4  -4 554.875 38.4191  10
  -9  -4  -4 614.342 44.4546  12
  -9  -3   6 90.7148 19.5642  14
  -9  -3   5 255.177 29.2793  15
  -9  -3   5 245.658 29.4719  14
  -9  -3   4 2198.77 82.5609  10
  -9  -3   4 2310.98 92.2886  15
  -9  -3   3 228.390 30.4717  10
  -9  -3   3 281.322 39.2545  15
  -9  -3   2 1517.97 80.0074  10
  -9  -3   2 1540.97 83.9905  15
  -9  -3   1 177.930 36.1281  10
  -9  -3   1 223.611 40.5796  15
  -9  -3   0 469.405 50.1078  10
  -9  -3   0 533.743 52.2434  15
  -9  -3  -1 354.999 42.1328  10
  -9  -3  -1 418.564 45.8185  15
  -9  -3  -1 309.132 42.2707  12
  -9  -3  -2 3724.46 130.846  10
  -9  -3  -2 3563.02 132.263  12
  -9  -3  -3 1363.87 70.6609  10
  -9  -3  -3 1408.73 76.2221  12
  -9  -3  -4 1537.79 74.9910  12
  -9  -3  -5 266.996 29.9386  12
  -9  -2   6 748.283 44.1293  14
  -9  -2   5 678.848 42.0383  10
  -9  -2   5 431.300 37.6957  14
  -9  -2   4 112.124 27.7246  10
  -9  -2   4 173.742 30.5791  15
  -9  -2   3 231.172 33.4187  10
  -9  -2   3 439.807 46.3430  15
  -9  -2   2 322.489 42.5769  10
  -9  -2   2 299.617 46.6817  15
  -9  -2   1 6939.66 200.721  10
  -9  -2   1 7186.26 203.236  15
  -9  -2   0 567.971 53.2678  10
  -9  -2   0 701.277 60.8594  15
  -9  -2  -1 762.974 59.6757  10
  -9  -2  -1 685.428 58.7559  12
  -9  -2  -2 517.708 48.7575  10
  -9  -2  -2 536.808 52.4483  12
  -9  -2  -3 3609.94 119.946  10
  -9  -2  -3 3492.93 130.892  12
  -9  -2  -4-6.88324 22.6385  12
  -9  -2  -5 443.503 39.4175  12
  -9  -2  -6 722.200 43.2175  12
  -9  -1   6 5.25359 15.7250  14
  -9  -1   5 901.670 49.7885  10
  -9  -1   5 561.434 42.7689  14
  -9  -1   4 402.702 41.4568  10
  -9  -1   4 483.352 44.1332  15
  -9  -1   3 1397.30 73.6291  10
  -9  -1   3 1649.50 83.1390  15
  -9  -1   2 3677.34 133.607  10
  -9  -1   2 4196.39 142.142  15
  -9  -1   1 699.142 60.0670  10
  -9  -1   1 750.568 65.7763  15
  -9  -1   0 466.762 52.7116  10
  -9  -1   0 428.220 47.8179  12
  -9  -1  -1 2906.46 115.975  10
  -9  -1  -1 2839.00 120.161  12
  -9  -1  -2 1766.53 84.3077  10
  -9  -1  -2 1707.00 90.9209  12
  -9  -1  -3 1171.17 62.2639  10
  -9  -1  -3 1112.79 72.1847  12
  -9  -1  -4 678.629 53.7613  12
  -9  -1  -5 73.9499 24.4153  12
  -9  -1  -6 831.900 48.7816  12
  -9   0   6 2283.94 80.3042  14
  -9   0   4 638.195 49.4237  10
  -9   0   3 1216.72 70.4247  10
  -9   0   2 32.3361 29.2230  10
  -9   0   1 3186.05 120.641  10
  -9   0   0 2595.00 107.979  10
  -9   0   0 2651.30 112.446  12
  -9   0  -1 892.272 61.2905  10
  -9   0  -1 813.930 62.7456  12
  -9   0  -2 3039.79 111.108  10
  -9   0  -2 3199.17 125.314  12
  -9   0  -3 2850.66 117.708  12
  -9   0  -4 1978.95 93.1661  12
  -9   0  -5 139.562 28.4823  12
  -9   0  -6 132.754 24.2914  12
  -9   1   6 5.95311 13.9972  14
  -9   1   4 528.655 49.2356  10
  -9   1   3 1537.88 79.6662  10
  -9   1   2 3774.25 131.048  10
  -9   1   1 475.689 48.4971  10
  -9   1   0 395.339 43.3468  10
  -9   1   0 386.345 42.3640  12
  -9   1  -1 2713.24 105.420  10
  -9   1  -1 2790.89 114.531  12
  -9   1  -2 1448.30 70.3313  10
  -9   1  -2 1546.80 84.5427  12
  -9   1  -3 1195.73 73.7010  12
  -9   1  -4 589.700 50.6850  12
  -9   1  -5 129.042 27.7896  12
  -9   1  -6 818.117 49.3841  12
  -9   2   6 733.403 40.4173  14
  -9   2   3 663.949 57.1009  10
  -9   2   2 273.806 41.9900  10
  -9   2   1 6744.64 184.353  10
  -9   2   0 487.102 46.2507  10
  -9   2   0 425.362 41.2186  12
  -9   2  -1 691.625 50.5628  10
  -9   2  -1 619.787 53.1207  12
  -9   2  -2 502.214 48.6432  12
  -9   2  -3 3524.99 128.544  12
  -9   2  -4 10.1178 22.2135  12
  -9   2  -5 394.969 38.2573  12
  -9   2  -6 700.600 44.4349  12
  -9   3   2 1854.52 86.6118  10
  -9   3   1 311.744 45.8280  10
  -9   3   0 596.519 50.9408  10
  -9   3  -1 485.964 44.2613  10
  -9   3  -2 3344.53 119.599  12
  -9   3  -3 1386.71 73.6704  12
  -9   3  -4 1376.24 71.0742  12
  -9   3  -5 234.667 29.9431  12
  -9   3  -6 147.392 21.6815  12
  -9   4  -3 1160.85 62.2409  12
  -9   4  -4 507.252 40.4332  12
  -9   4  -5 377.551 32.9172  12
 -10  -5   1 1431.41 57.4432  10
 -10  -5   0 389.976 30.4901  10
 -10  -5  -1 58.6405 17.7405  10
 -10  -4   2 1352.11 55.9469  10
 -10  -4   1 682.817 41.7456  10
 -10  -4   0 241.301 27.6994  10
 -10  -4  -1 94.8509 21.3675  10
 -10  -4  -2 441.160 31.5672  10
 -10  -3   3 1996.86 67.4866  10
 -10  -3   2 457.577 36.4060  10
 -10  -3   1 97.7186 22.0230  10
 -10  -3   0 8.46277 22.5012  10
 -10  -3  -1 2475.51 87.6783  10
 -10  -3  -2-31.5919 23.0892  10
 -10  -2   3 478.954 36.0233  10
 -10  -2   2 1166.72 58.1317  10
 -10  -2   1 246.331 31.0927  10
 -10  -2   0 1322.72 65.2996  10
 -10  -2  -1 52.0055 21.4790  10
 -10  -2  -2 4426.07 119.637  10
 -10  -1   3 834.187 47.0294  10
 -10  -1   2 76.8953 26.1580  10
 -10  -1   1 1696.75 73.9973  10
 -10  -1   0 61.4739 24.3416  10
 -10  -1  -1 4610.79 129.587  10
 -10  -1  -2 842.839 45.1899  10
 -10  -1  -3 635.752 43.1549  12
 -10  -1  -4 317.234 29.1549  12
 -10   0   3 2412.73 82.9628  10
 -10   0   2 425.885 39.5353  10
 -10   0   1 107.936 29.2816  10
 -10   0   0 7393.10 180.825  10
 -10   0  -1 3096.44 98.4801  10
 -10   0  -2 1365.79 56.1379  10
 -10   0  -2 1411.33 67.3292  12
 -10   0  -3 2004.55 78.3493  12
 -10   0  -4 30.1576 16.4787  12
 -10   1   2 156.481 32.6434  10
 -10   1   1 1968.36 76.9715  10
 -10   1   0 123.331 27.6336  10
 -10   1  -1 4867.38 127.454  10
 -10   1  -2 926.113 53.5628  12
 -10   1  -3 646.099 42.3114  12
 -10   1  -4 333.794 28.7730  12
 -10   2  -2 4854.36 130.874  12
 -10   2  -3 162.279 24.1616  12
   0   0   0    0.00    0.00   0
TITL cyc150509_zz in P2(1)
REM P2(1) (#4 in standard setting)
CELL 1.54184   8.724055  12.406980  10.562849  90.0000  91.0399  90.0000
ZERR   16.00   0.000127   0.000167   0.000132   0.0000   0.0013   0.0000
LATT -1
SYMM -x, y+1/2,-z
SFAC C H N O
UNIT 16.00 16.00 32.00 16.00
TREF
HKLF 4
END
;
_shelx_hkl_checksum               17110
_olex2_submission_special_instructions 'No special instructions were received'
