# Supplementary material for: Switchable regioselectivity in amine-catalysed asymmetric cycloadditions
Source: Springer Nature journal article supplement (doi:10.1038/nchem.2698), 2017-01-16
Supplement: 41557_2017_BFnchem2698_MOESM28_ESM.mol [file 41557_2017_BFnchem2698_MOESM28_ESM.mol]

nchem.2698-comp3b.mol
  ChemDraw12161611482D

 35 40  0  0  1  0  0  0  0  0999 V2000
   -2.2064    0.7806    0.0000 C   0  0  0  0  0  0  0  0  0  0  0  0
   -1.9527   -0.0044    0.0000 C   0  0  0  0  0  0  0  0  0  0  0  0
   -1.1278   -0.0057    0.0000 C   0  0  0  0  0  0  0  0  0  0  0  0
   -0.8716    0.7784    0.0000 C   0  0  0  0  0  0  0  0  0  0  0  0
   -1.5382    1.2644    0.0000 C   0  0  0  0  0  0  0  0  0  0  0  0
   -1.5369    2.0893    0.0000 O   0  0  0  0  0  0  0  0  0  0  0  0
   -0.4613   -0.4917    0.0000 C   0  0  0  0  0  0  0  0  0  0  0  0
    0.2069   -0.0079    0.0000 C   0  0  0  0  0  0  0  0  0  0  0  0
   -0.0467    0.7771    0.0000 C   0  0  0  0  0  0  0  0  0  0  0  0
    0.7809    0.5846    0.0000 C   0  0  0  0  0  0  0  0  0  0  0  0
    1.5217    0.2218    0.0000 C   0  0  0  0  0  0  0  0  0  0  0  0
    1.4056   -0.5949    0.0000 N   0  0  0  0  0  0  0  0  0  0  0  0
    0.5930   -0.7369    0.0000 C   0  0  0  0  0  0  0  0  0  0  0  0
    0.7247    1.4076    0.0000 C   0  0  0  0  0  0  0  0  0  0  0  0
    1.4093    1.8677    0.0000 C   0  0  0  0  0  0  0  0  0  0  0  0
    2.1502    1.5049    0.0000 C   0  0  0  0  0  0  0  0  0  0  0  0
    2.2064    0.6819    0.0000 N   0  0  0  0  0  0  0  0  0  0  0  0
    1.9981   -1.1689    0.0000 C   0  0  0  0  0  0  0  0  0  0  0  0
    0.1791   -1.4537    0.0000 O   0  0  0  0  0  0  0  0  0  0  0  0
   -0.6574    1.5780    0.0000 H   0  0  0  0  0  0  0  0  0  0  0  0
   -1.3421   -0.8053    0.0000 H   0  0  0  0  0  0  0  0  0  0  0  0
   -0.6755   -1.2912    0.0000 C   0  0  0  0  0  0  0  0  0  0  0  0
    1.0746   -3.0413    0.0000 C   0  0  0  0  0  0  0  0  0  0  0  0
    0.2777   -3.2549    0.0000 C   0  0  0  0  0  0  0  0  0  0  0  0
   -0.3057   -2.6715    0.0000 C   0  0  0  0  0  0  0  0  0  0  0  0
   -0.0921   -1.8746    0.0000 C   0  0  0  0  0  0  0  0  0  0  0  0
    0.7048   -1.6611    0.0000 C   0  0  0  0  0  0  0  0  0  0  0  0
    1.2881   -2.2444    0.0000 C   0  0  0  0  0  0  0  0  0  0  0  0
   -1.4724   -1.5048    0.0000 O   0  0  0  0  0  0  0  0  0  0  0  0
   -0.0467    1.6049    0.0000 C   0  0  0  0  0  0  0  0  0  0  0  0
    0.6677    2.0174    0.0000 C   0  0  0  0  0  0  0  0  0  0  0  0
    0.6677    2.8424    0.0000 C   0  0  0  0  0  0  0  0  0  0  0  0
   -0.0467    3.2549    0.0000 C   0  0  0  0  0  0  0  0  0  0  0  0
   -0.7612    2.8424    0.0000 C   0  0  0  0  0  0  0  0  0  0  0  0
   -0.7612    2.0174    0.0000 C   0  0  0  0  0  0  0  0  0  0  0  0
 28 23  2  0      
 23 24  1  0      
 24 25  2  0      
 25 26  1  0      
 26 27  2  0      
 28 27  1  0      
 26 22  1  0      
 22 29  2  0      
  7 22  1  1      
 34 35  2  0      
 33 34  1  0      
 32 33  2  0      
 31 32  1  0      
 30 31  2  0      
 30 35  1  0      
  9 30  1  1      
  1  2  2  0      
  2  3  1  0      
  3  4  1  0      
  4  5  1  0      
  5  1  1  0      
  5  6  2  0      
  3  7  1  0      
  7  8  1  0      
  8  9  1  0      
  9  4  1  0      
  8 10  1  1      
 10 11  2  0      
 11 12  1  0      
 12 13  1  0      
  8 13  1  6      
 10 14  1  0      
 14 15  2  0      
 15 16  1  0      
 16 17  2  0      
 17 11  1  0      
 12 18  1  0      
 13 19  2  0      
  4 20  1  1      
  3 21  1  1      
M  STY  1   1 SUP
M  SLB  1   1   1
M  SAL   1  8  22  23  24  25  26  27  28  29
M  SBL   1  1   9
M  SMT   1 ^Bz
M  SBV   1   9    0.2142    0.7996
M  STY  1   2 SUP
M  SLB  1   2   2
M  SAL   2  6  30  31  32  33  34  35
M  SBL   2  1  16
M  SMT   2 Ph
M  SBV   2  16    0.0000   -0.8278
M  END
