# Supplementary material for: Switchable regioselectivity in amine-catalysed asymmetric cycloadditions
Source: Springer Nature journal article supplement (doi:10.1038/nchem.2698), 2017-01-16
Supplement: 41557_2017_BFnchem2698_MOESM370_ESM.cif [file 41557_2017_BFnchem2698_MOESM370_ESM.cif]

data_7b
_audit_creation_date              2015-12-29
_audit_creation_method
;
Olex2 1.2-alpha
(compiled 2015.09.16 svn.r3215 for OlexSys, GUI svn.r5097)
;
_publ_contact_author_address      ?
_publ_contact_author_email        ?
_publ_contact_author_name         ''
_publ_contact_author_phone        ?
_publ_section_references
;
Dolomanov, O.V., Bourhis, L.J., Gildea, R.J, Howard, J.A.K. & Puschmann, H.
 (2009), J. Appl. Cryst. 42, 339-341.

Palatinus, L. & Chapuis, G. (2007). J. Appl. Cryst., 40, 786-790;
Palatinus, L. & van der Lee, A. (2008). J. Appl. Cryst. 41, 975-984;
Palatinus, L., Prathapa, S. J. & van Smaalen, S. (2012). J. Appl. Cryst. 45,
 575-580.

Sheldrick, G.M. (2015). Acta Cryst. C71, 3-8.
;
_chemical_name_common             ?
_chemical_name_systematic         ?
_chemical_formula_moiety          '2(C24 H21 N O4)'
_chemical_formula_sum             'C48 H40 N2 O8'
_chemical_formula_weight          772.82
_chemical_absolute_configuration  rm
_chemical_melting_point           ?
_chemical_oxdiff_formula          'C1 H1 O1 N1'
loop_
  _atom_type_symbol
  _atom_type_description
  _atom_type_scat_dispersion_real
  _atom_type_scat_dispersion_imag
  _atom_type_scat_source
 'C' 'C' 0.0181 0.0091 'International Tables Vol C Tables 4.2.6.8 and 6.1.1.4'
 'H' 'H' 0.0000 0.0000 'International Tables Vol C Tables 4.2.6.8 and 6.1.1.4'
 'N' 'N' 0.0311 0.0180 'International Tables Vol C Tables 4.2.6.8 and 6.1.1.4'
 'O' 'O' 0.0492 0.0322 'International Tables Vol C Tables 4.2.6.8 and 6.1.1.4'

_shelx_space_group_comment
;
The symmetry employed for this shelxl refinement is uniquely defined
by the following loop, which should always be used as a source of
symmetry information in preference to the above space-group names.
They are only intended as comments.
;
_space_group_crystal_system       'monoclinic'
_space_group_IT_number            4
_space_group_name_H-M_alt         'P 1 21 1'
_space_group_name_Hall            'P 2yb'
loop_
  _space_group_symop_operation_xyz
 'x, y, z'
 '-x, y+1/2, -z'

_cell_length_a                    7.92467(15)
_cell_length_b                    20.0828(3)
_cell_length_c                    12.8318(3)
_cell_angle_alpha                 90
_cell_angle_beta                  107.625(2)
_cell_angle_gamma                 90
_cell_volume                      1946.32(7)
_cell_formula_units_Z             2
_cell_measurement_reflns_used     5759
_cell_measurement_temperature     286.21(10)
_cell_measurement_theta_max       71.1540
_cell_measurement_theta_min       4.4050
_shelx_estimated_absorpt_T_max    ?
_shelx_estimated_absorpt_T_min    ?
_exptl_absorpt_coefficient_mu     0.732
_exptl_absorpt_correction_T_max   1.00000
_exptl_absorpt_correction_T_min   0.73029
_exptl_absorpt_correction_type    multi-scan
_exptl_absorpt_process_details
;
CrysAlisPro, Agilent Technologies,
Version 1.171.37.35 (release 13-08-2014 CrysAlis171 .NET)
(compiled Aug 13 2014,18:06:01)
Empirical absorption correction using spherical harmonics,
 implemented in SCALE3 ABSPACK scaling algorithm.
;
_exptl_absorpt_special_details    ?
_exptl_crystal_colour             'clear light colourless'
_exptl_crystal_colour_lustre      clear
_exptl_crystal_colour_modifier    light
_exptl_crystal_colour_primary     colourless
_exptl_crystal_density_diffrn     1.319
_exptl_crystal_density_meas       ?
_exptl_crystal_density_method     ?
_exptl_crystal_description        ''
_exptl_crystal_F_000              812
_exptl_crystal_size_max           0.12
_exptl_crystal_size_mid           0.07
_exptl_crystal_size_min           0.03
_exptl_transmission_factor_max    ?
_exptl_transmission_factor_min    ?
_diffrn_reflns_av_R_equivalents   0.0249
_diffrn_reflns_av_unetI/netI      0.0308
_diffrn_reflns_Laue_measured_fraction_full 0.954
_diffrn_reflns_Laue_measured_fraction_max 0.934
_diffrn_reflns_limit_h_max        6
_diffrn_reflns_limit_h_min        -9
_diffrn_reflns_limit_k_max        24
_diffrn_reflns_limit_k_min        -23
_diffrn_reflns_limit_l_max        15
_diffrn_reflns_limit_l_min        -10
_diffrn_reflns_number             10147
_diffrn_reflns_point_group_measured_fraction_full 0.797
_diffrn_reflns_point_group_measured_fraction_max 0.770
_diffrn_reflns_theta_full         67.684
_diffrn_reflns_theta_max          71.476
_diffrn_reflns_theta_min          4.403
_diffrn_ambient_environment       air
_diffrn_ambient_temperature       286.21(10)
_diffrn_detector                  'CCD plate'
_diffrn_detector_area_resol_mean  8.0243
_diffrn_detector_type             EosS2
_diffrn_measured_fraction_theta_full 0.954
_diffrn_measured_fraction_theta_max 0.934
_diffrn_measurement_details
;
#__ type_ start__ end____ width___ exp.time_
  1 omega   20.00  104.00   1.0000    1.3500
omega____ theta____ kappa____ phi______ frames
    -       36.9703   57.0000 -180.0000 84

#__ type_ start__ end____ width___ exp.time_
  2 omega  -30.00   54.00   1.0000    1.3500
omega____ theta____ kappa____ phi______ frames
    -       36.9703  -57.0000 -120.0000 84

#__ type_ start__ end____ width___ exp.time_
  3 omega    1.00   76.00   1.0000    1.3500
omega____ theta____ kappa____ phi______ frames
    -       36.9703  -99.0000  120.0000 75

#__ type_ start__ end____ width___ exp.time_
  4 omega    1.00   76.00   1.0000    1.3500
omega____ theta____ kappa____ phi______ frames
    -       36.9703  -99.0000 -150.0000 75

#__ type_ start__ end____ width___ exp.time_
  5 omega   20.00  104.00   1.0000    1.3500
omega____ theta____ kappa____ phi______ frames
    -       36.9703   57.0000  120.0000 84

#__ type_ start__ end____ width___ exp.time_
  6 omega   38.00   91.00   1.0000   30.0000
omega____ theta____ kappa____ phi______ frames
    -      108.0000  -30.0000  150.0000 53

#__ type_ start__ end____ width___ exp.time_
  7 omega   38.00   91.00   1.0000   30.0000
omega____ theta____ kappa____ phi______ frames
    -      108.0000  -30.0000 -180.0000 53

#__ type_ start__ end____ width___ exp.time_
  8 omega   39.00  110.00   1.0000   30.0000
omega____ theta____ kappa____ phi______ frames
    -      108.0000  -95.0000  -60.0000 71

#__ type_ start__ end____ width___ exp.time_
  9 omega   40.00   98.00   1.0000   30.0000
omega____ theta____ kappa____ phi______ frames
    -      108.0000  -45.0000  -30.0000 58

#__ type_ start__ end____ width___ exp.time_
 10 omega   38.00   91.00   1.0000   30.0000
omega____ theta____ kappa____ phi______ frames
    -      108.0000  -30.0000   30.0000 53

#__ type_ start__ end____ width___ exp.time_
 11 omega   90.00  175.00   1.0000   30.0000
omega____ theta____ kappa____ phi______ frames
    -      108.0000   61.0000  -60.0000 85

#__ type_ start__ end____ width___ exp.time_
 12 omega   38.00  116.00   1.0000   30.0000
omega____ theta____ kappa____ phi______ frames
    -      108.0000 -112.0000 -180.0000 78

#__ type_ start__ end____ width___ exp.time_
 13 omega   20.00  104.00   1.0000    1.3500
omega____ theta____ kappa____ phi______ frames
    -       36.9703   57.0000   30.0000 84

#__ type_ start__ end____ width___ exp.time_
 14 omega   57.00  109.00   1.0000    1.3500
omega____ theta____ kappa____ phi______ frames
    -       36.9703  178.0000   90.0000 52

#__ type_ start__ end____ width___ exp.time_
 15 omega  -32.00   56.00   1.0000    1.3500
omega____ theta____ kappa____ phi______ frames
    -       36.9703  -38.0000    0.0000 88

#__ type_ start__ end____ width___ exp.time_
 16 omega   20.00  104.00   1.0000    1.3500
omega____ theta____ kappa____ phi______ frames
    -       36.9703   57.0000  -30.0000 84

#__ type_ start__ end____ width___ exp.time_
 17 omega   18.00  106.00   1.0000    1.3500
omega____ theta____ kappa____ phi______ frames
    -       36.9703   38.0000  -60.0000 88
;
_diffrn_measurement_device        'four-circle diffractometer'
_diffrn_measurement_device_type   'SuperNova, Dual, Cu at zero, EosS2'
_diffrn_measurement_method        '\w scans'
_diffrn_orient_matrix_UB_11       -0.0956621000
_diffrn_orient_matrix_UB_12       -0.0286310000
_diffrn_orient_matrix_UB_13       -0.1139956000
_diffrn_orient_matrix_UB_21       0.0120394000
_diffrn_orient_matrix_UB_22       -0.0703789000
_diffrn_orient_matrix_UB_23       0.0494488000
_diffrn_orient_matrix_UB_31       -0.1798070000
_diffrn_orient_matrix_UB_32       0.0105200000
_diffrn_orient_matrix_UB_33       0.0206416000
_diffrn_radiation_monochromator   mirror
_diffrn_radiation_probe           x-ray
_diffrn_radiation_type            CuK\a
_diffrn_radiation_wavelength      1.54184
_diffrn_source                    'sealed X-ray tube'
_diffrn_source_type               'SuperNova (Cu) X-ray Source'
_reflns_Friedel_coverage          0.599
_reflns_Friedel_fraction_full     0.629
_reflns_Friedel_fraction_max      0.595
_reflns_number_gt                 5382
_reflns_number_total              5841
_reflns_odcompleteness_completeness 95.61
_reflns_odcompleteness_iscentric  1
_reflns_odcompleteness_theta      66.97
_reflns_special_details
;
 Reflections were merged by SHELXL according to the crystal
 class for the calculation of statistics and refinement.
 
 _reflns_Friedel_fraction is defined as the number of unique
 Friedel pairs measured divided by the number that would be
 possible theoretically, ignoring centric projections and
 systematic absences.
;
_reflns_threshold_expression      'I > 2\s(I)'
_computing_cell_refinement
;
CrysAlisPro, Agilent Technologies,
Version 1.171.37.35 (release 13-08-2014 CrysAlis171 .NET)
(compiled Aug 13 2014,18:06:01)
;
_computing_data_collection
;
CrysAlisPro, Agilent Technologies,
Version 1.171.37.35 (release 13-08-2014 CrysAlis171 .NET)
(compiled Aug 13 2014,18:06:01)
;
_computing_data_reduction
;
CrysAlisPro, Agilent Technologies,
Version 1.171.37.35 (release 13-08-2014 CrysAlis171 .NET)
(compiled Aug 13 2014,18:06:01)
;
_computing_molecular_graphics     'Olex2 (Dolomanov et al., 2009)'
_computing_publication_material   'Olex2 (Dolomanov et al., 2009)'
_computing_structure_refinement   'ShelXL (Sheldrick, 2015)'
_computing_structure_solution
;
Superflip (Palatinus & Chapuis, 2007;Palatinus & van der Lee, 2008;
Palatinus et al., 2012)
;
_refine_diff_density_max          0.182
_refine_diff_density_min          -0.119
_refine_diff_density_rms          0.026
_refine_ls_abs_structure_details
;
 Flack x determined using 1911 quotients [(I+)-(I-)]/[(I+)+(I-)]
 (Parsons, Flack and Wagner, Acta Cryst. B69 (2013) 249-259).
;
_refine_ls_abs_structure_Flack    -0.07(12)
_refine_ls_extinction_coef        .
_refine_ls_extinction_method      none
_refine_ls_goodness_of_fit_ref    1.051
_refine_ls_hydrogen_treatment     mixed
_refine_ls_matrix_type            full
_refine_ls_number_parameters      541
_refine_ls_number_reflns          5841
_refine_ls_number_restraints      1
_refine_ls_R_factor_all           0.0405
_refine_ls_R_factor_gt            0.0371
_refine_ls_restrained_S_all       1.051
_refine_ls_shift/su_max           0.000
_refine_ls_shift/su_mean          0.000
_refine_ls_structure_factor_coef  Fsqd
_refine_ls_weighting_details
'w=1/[\s^2^(Fo^2^)+(0.0574P)^2^+0.1585P] where P=(Fo^2^+2Fc^2^)/3'
_refine_ls_weighting_scheme       calc
_refine_ls_wR_factor_gt           0.1031
_refine_ls_wR_factor_ref          0.1063
_refine_special_details           ?
_olex2_refinement_description
;
1. Fixed Uiso
 At 1.2 times of:
  All C(H) groups, All C(H,H) groups
 At 1.5 times of:
  All C(H,H,H) groups
2.a Ternary CH refined with riding coordinates:
 C0BA(H0BA), C4AA(H4AA), C6BA(H6BA), C1AA(H1AA), C(H), C7BA(H7BA), C2AA(H2AA),
 C3AA(H3AA)
2.b Secondary CH2 refined with riding coordinates:
 C6(H6A,H6B), C5(H5A,H5B)
2.c Aromatic/amide H refined with riding coordinates:
 C4BA(H4BA), C5BA(H5BA), C2BA(H2BA), C2(H2), C12(H12), C3BA(H3BA), C6AA(H6AA),
 C15(H15), C17(H17), C9(H9), C19(H19), C1A(H1A), C1B(H1B), C1C(H1C), C1D(H1D),
 C1E(H1E), C1G(H1G), C1H(H1H), C1I(H1I), C1K(H1K)
2.d Idealised Me refined as rotating group:
 C1F(H1FA,H1FB,H1FC), C1J(H1JA,H1JB,H1JC)
;
_atom_sites_solution_hydrogens    mixed
_atom_sites_solution_primary      ?
_atom_sites_solution_secondary    ?
loop_
  _atom_site_label
  _atom_site_type_symbol
  _atom_site_fract_x
  _atom_site_fract_y
  _atom_site_fract_z
  _atom_site_U_iso_or_equiv
  _atom_site_adp_type
  _atom_site_occupancy
  _atom_site_site_symmetry_order
  _atom_site_calc_flag
  _atom_site_refinement_flags_posn
  _atom_site_refinement_flags_adp
  _atom_site_refinement_flags_occupancy
  _atom_site_disorder_assembly
  _atom_site_disorder_group
 O1 N 0.8317(3) 0.19303(11) 0.8808(2) 0.0483(5) Uani 1 1 d . . . . .
 O2 O 0.5897(4) 0.71695(12) 1.0097(2) 0.0756(7) Uani 1 1 d . . . . .
 N N 0.4084(4) 0.67913(12) 0.8457(2) 0.0550(6) Uani 1 1 d . . . . .
 O4 O 1.0268(4) 0.14955(11) 1.0360(2) 0.0720(7) Uani 1 1 d . . . . .
 O5 O 0.5866(4) 0.39405(13) 1.1054(3) 0.0859(8) Uani 1 1 d . . . . .
 O6 O 0.6227(3) 0.25630(12) 0.7588(2) 0.0693(6) Uani 1 1 d . . . . .
 C9AA C 0.9356(4) 0.41988(13) 0.9562(2) 0.0486(6) Uani 1 1 d . . . . .
 O8 O 0.4719(4) 0.50316(17) 0.4526(2) 0.0870(8) Uani 1 1 d . . . . .
 C0AA C 0.7313(4) 0.25032(14) 0.8471(3) 0.0504(6) Uani 1 1 d . . . . .
 O10 O 1.0681(5) 0.48116(13) 1.1209(2) 0.1014(11) Uani 1 1 d . . . . .
 C0BA C 0.4592(5) 0.56501(15) 1.0408(3) 0.0575(7) Uani 1 1 d . . . . .
 H0BA H 0.3941 0.5971 1.0716 0.069 Uiso 1 1 calc R . . . .
 C4AA C 0.7874(4) 0.30041(14) 0.9380(2) 0.0493(6) Uani 1 1 d . . . . .
 H4AA H 0.6906 0.3225 0.9571 0.059 Uiso 1 1 calc R . . . .
 C6BA C 0.3395(4) 0.52704(14) 0.9385(3) 0.0535(7) Uani 1 1 d . . . . .
 H6BA H 0.2125 0.5365 0.9206 0.064 Uiso 1 1 calc R . . . .
 C4BA C 0.8687(4) 0.47302(14) 0.8940(3) 0.0517(6) Uani 1 1 d . . . . .
 H4BA H 0.8934 0.5137 0.9301 0.062 Uiso 1 1 calc R . . . .
 C1AA C 0.9217(4) 0.26384(14) 1.0323(2) 0.0498(6) Uani 1 1 d . . . . .
 H1AA H 0.8937 0.2645 1.1016 0.060 Uiso 1 1 calc R . . . .
 C1BA C 0.9369(4) 0.19532(14) 0.9887(2) 0.0516(6) Uani 1 1 d . . . . .
 C1 C 0.2315(4) 0.39907(14) 0.7766(3) 0.0543(7) Uani 1 1 d . . . . .
 O7AA O -0.0450(5) 0.37498(17) 0.4466(3) 0.0916(8) Uani 1 1 d . . . . .
 O19 O 0.2120(5) 0.61740(14) 0.7137(2) 0.0889(9) Uani 1 1 d . . . . .
 C3 C 0.9299(4) 0.13835(13) 0.7339(2) 0.0508(6) Uani 1 1 d . . . . .
 C C 0.4355(4) 0.56378(14) 0.8660(3) 0.0531(7) Uani 1 1 d . . . . .
 H H 0.4956 0.5342 0.8280 0.064 Uiso 1 1 calc R . . . .
 C7BA C 0.5590(4) 0.59742(14) 0.9675(3) 0.0535(7) Uani 1 1 d . . . . .
 H7BA H 0.6833 0.5840 0.9847 0.064 Uiso 1 1 calc R . . . .
 C4 C 0.7647(4) 0.47767(14) 0.7800(3) 0.0518(6) Uani 1 1 d . . . . .
 C2AA C 0.9392(3) 0.34791(13) 0.9258(2) 0.0450(5) Uani 1 1 d . . . . .
 H2AA H 0.9685 0.3410 0.8577 0.054 Uiso 1 1 calc R . . . .
 C8AA C 0.4516(5) 0.74646(14) 0.6970(3) 0.0598(7) Uani 1 1 d . . . . .
 C6 C 0.3684(5) 0.74291(15) 0.7883(3) 0.0586(7) Uani 1 1 d . . . . .
 H6A H 0.4131 0.7790 0.8395 0.070 Uiso 1 1 calc R . . . .
 H6B H 0.2411 0.7481 0.7584 0.070 Uiso 1 1 calc R . . . .
 C7 C 0.5642(4) 0.4921(2) 0.5604(3) 0.0646(8) Uani 1 1 d . . . . .
 C3AA C 1.0713(4) 0.31264(14) 1.0271(3) 0.0496(6) Uani 1 1 d . . . . .
 H3AA H 1.1711 0.2909 1.0107 0.059 Uiso 1 1 calc R . . . .
 C8 C 1.0427(5) 0.42917(15) 1.0713(3) 0.0622(8) Uani 1 1 d . . . . .
 C5BA C 0.2048(4) 0.33669(17) 0.7239(3) 0.0642(8) Uani 1 1 d . . . . .
 H5BA H 0.2528 0.2988 0.7636 0.077 Uiso 1 1 calc R . . . .
 C2BA C 1.1066(4) 0.15592(17) 0.7722(3) 0.0637(8) Uani 1 1 d . . . . .
 H2BA H 1.1554 0.1689 0.8447 0.076 Uiso 1 1 calc R . . . .
 C11 C 0.5274(4) 0.67135(15) 0.9480(3) 0.0551(7) Uani 1 1 d . . . . .
 C2 C 0.6514(5) 0.54647(17) 0.6193(3) 0.0648(8) Uani 1 1 d . . . . .
 H2 H 0.6431 0.5879 0.5857 0.078 Uiso 1 1 calc R . . . .
 C12 C 0.1530(4) 0.45378(16) 0.7126(3) 0.0623(8) Uani 1 1 d . . . . .
 H12 H 0.1641 0.4956 0.7450 0.075 Uiso 1 1 calc R . . . .
 C3BA C 0.7492(4) 0.53951(15) 0.7263(3) 0.0572(7) Uani 1 1 d . . . . .
 H3BA H 0.8068 0.5764 0.7647 0.069 Uiso 1 1 calc R . . . .
 C6AA C 0.0594(5) 0.44779(18) 0.6029(3) 0.0677(9) Uani 1 1 d . . . . .
 H6AA H 0.0104 0.4853 0.5624 0.081 Uiso 1 1 calc R . . . .
 C5 C 0.8175(4) 0.13479(14) 0.8095(3) 0.0558(7) Uani 1 1 d . . . . .
 H5A H 0.6947 0.1296 0.7658 0.067 Uiso 1 1 calc R . . . .
 H5B H 0.8507 0.0954 0.8549 0.067 Uiso 1 1 calc R . . . .
 C15 C 1.2107(7) 0.1544(2) 0.7039(5) 0.0914(14) Uani 1 1 d . . . . .
 H15 H 1.3295 0.1662 0.7310 0.110 Uiso 1 1 calc R . . . .
 C5AA C 0.3352(5) 0.62001(16) 0.7967(3) 0.0590(7) Uani 1 1 d . . . . .
 C17 C 0.6716(4) 0.42436(16) 0.7196(3) 0.0607(8) Uani 1 1 d . . . . .
 H17 H 0.6766 0.3832 0.7536 0.073 Uiso 1 1 calc R . . . .
 C9 C 0.3396(4) 0.40248(14) 0.8890(3) 0.0546(7) Uani 1 1 d . . . . .
 H9 H 0.3830 0.3617 0.9199 0.066 Uiso 1 1 calc R . . . .
 C10 C 0.5614(7) 0.51309(18) 1.1239(3) 0.0741(10) Uani 1 1 d . . . . .
 C18 C 0.0391(5) 0.3859(2) 0.5539(3) 0.0678(9) Uani 1 1 d . . . . .
 C19 C 0.6283(6) 0.7363(2) 0.7154(4) 0.0831(11) Uani 1 1 d . . . . .
 H19 H 0.7017 0.7271 0.7854 0.100 Uiso 1 1 calc R . . . .
 C13 C 0.5189(5) 0.44612(16) 1.0657(3) 0.0631(8) Uani 1 1 d . . . . .
 C14 C 0.3883(4) 0.45485(14) 0.9569(3) 0.0548(7) Uani 1 1 d . . . . .
 C1A C 0.5726(5) 0.43041(18) 0.6114(3) 0.0661(8) Uani 1 1 d . . . . .
 H1A H 0.5123 0.3939 0.5731 0.079 Uiso 1 1 calc R . . . .
 C16 C 1.1268(5) 0.36387(17) 1.1185(3) 0.0670(8) Uani 1 1 d . . . . .
 C1B C 0.9707(11) 0.1200(3) 0.5582(4) 0.115(2) Uani 1 1 d . . . . .
 H1B H 0.9242 0.1079 0.4851 0.138 Uiso 1 1 calc R . . . .
 C1C C 0.5825(10) 0.7528(3) 0.5229(4) 0.1065(18) Uani 1 1 d . . . . .
 H1C H 0.6271 0.7557 0.4638 0.128 Uiso 1 1 calc R . . . .
 C1D C 0.8602(7) 0.1212(2) 0.6266(3) 0.0845(11) Uani 1 1 d . . . . .
 H1D H 0.7408 0.1104 0.5985 0.101 Uiso 1 1 calc R . . . .
 C1E C 0.1108(5) 0.33038(19) 0.6166(4) 0.0735(9) Uani 1 1 d . . . . .
 H1E H 0.0941 0.2884 0.5847 0.088 Uiso 1 1 calc R . . . .
 C1F C 0.3722(7) 0.4499(3) 0.3917(4) 0.0963(14) Uani 1 1 d . . . . .
 H1FA H 0.3068 0.4654 0.3201 0.145 Uiso 1 1 calc GR . . . .
 H1FB H 0.2914 0.4335 0.4283 0.145 Uiso 1 1 calc GR . . . .
 H1FC H 0.4507 0.4148 0.3854 0.145 Uiso 1 1 calc GR . . . .
 C1G C 1.1436(11) 0.1362(3) 0.5989(5) 0.114(2) Uani 1 1 d . . . . .
 H1G H 1.2163 0.1348 0.5540 0.137 Uiso 1 1 calc R . . . .
 C1H C 0.6983(8) 0.7400(3) 0.6264(5) 0.1079(17) Uani 1 1 d . . . . .
 H1H H 0.8187 0.7340 0.6369 0.129 Uiso 1 1 calc R . . . .
 C1I C 0.3430(7) 0.7583(2) 0.5918(3) 0.0865(12) Uani 1 1 d . . . . .
 H1I H 0.2222 0.7645 0.5793 0.104 Uiso 1 1 calc R . . . .
 C1J C -0.1300(7) 0.4297(3) 0.3795(4) 0.1012(15) Uani 1 1 d . . . . .
 H1JA H -0.1920 0.4139 0.3075 0.152 Uiso 1 1 calc GR . . . .
 H1JB H -0.0425 0.4618 0.3751 0.152 Uiso 1 1 calc GR . . . .
 H1JC H -0.2125 0.4503 0.4111 0.152 Uiso 1 1 calc GR . . . .
 C1K C 0.4110(9) 0.7609(3) 0.5063(4) 0.1054(16) Uani 1 1 d . . . . .
 H1K H 0.3363 0.7685 0.4359 0.126 Uiso 1 1 calc R . . . .
 H16A H 1.077(5) 0.353(2) 1.176(3) 0.073(11) Uiso 1 1 d . . . . .
 H10A H 0.521(5) 0.513(2) 1.193(3) 0.081(12) Uiso 1 1 d . . . . .
 H10B H 0.701(6) 0.520(3) 1.152(4) 0.096(14) Uiso 1 1 d . . . . .
 H16B H 1.265(7) 0.371(3) 1.140(4) 0.102(15) Uiso 1 1 d . . . . .

loop_
  _atom_site_aniso_label
  _atom_site_aniso_U_11
  _atom_site_aniso_U_22
  _atom_site_aniso_U_33
  _atom_site_aniso_U_23
  _atom_site_aniso_U_13
  _atom_site_aniso_U_12
 O1 0.0529(12) 0.0375(11) 0.0587(13) -0.0005(10) 0.0230(11) -0.0025(9)
 O2 0.0971(18) 0.0468(12) 0.0726(15) -0.0013(11) 0.0103(14) -0.0107(12)
 N 0.0705(15) 0.0410(12) 0.0549(14) 0.0053(11) 0.0211(13) -0.0019(11)
 O4 0.0891(16) 0.0459(12) 0.0743(16) 0.0121(11) 0.0148(14) 0.0038(11)
 O5 0.108(2) 0.0479(13) 0.0851(18) 0.0154(13) 0.0036(17) 0.0068(13)
 O6 0.0632(12) 0.0581(13) 0.0718(15) -0.0004(12) -0.0018(12) -0.0017(10)
 C9AA 0.0527(15) 0.0390(13) 0.0555(15) -0.0003(12) 0.0187(13) 0.0018(11)
 O8 0.0879(18) 0.090(2) 0.0712(15) 0.0200(15) 0.0066(15) 0.0061(16)
 C0AA 0.0446(13) 0.0433(14) 0.0659(18) -0.0002(12) 0.0205(14) -0.0042(10)
 O10 0.162(3) 0.0481(14) 0.0706(16) -0.0151(13) 0.001(2) 0.0011(15)
 C0BA 0.0740(18) 0.0442(15) 0.0618(18) 0.0038(13) 0.0317(16) 0.0056(13)
 C4AA 0.0438(13) 0.0437(14) 0.0657(17) -0.0044(12) 0.0245(13) 0.0013(10)
 C6BA 0.0546(15) 0.0433(14) 0.0688(18) 0.0066(13) 0.0282(15) 0.0028(11)
 C4BA 0.0531(14) 0.0411(14) 0.0635(17) -0.0022(12) 0.0215(14) 0.0024(11)
 C1AA 0.0593(15) 0.0460(14) 0.0491(14) 0.0006(11) 0.0240(13) -0.0003(12)
 C1BA 0.0617(16) 0.0415(14) 0.0558(15) 0.0063(12) 0.0243(14) -0.0050(12)
 C1 0.0460(13) 0.0447(15) 0.076(2) 0.0011(13) 0.0247(15) -0.0018(11)
 O7AA 0.099(2) 0.085(2) 0.0812(19) -0.0129(16) 0.0133(17) -0.0028(16)
 O19 0.116(2) 0.0635(16) 0.0660(15) 0.0115(13) -0.0047(17) -0.0161(14)
 C3 0.0618(15) 0.0342(12) 0.0552(15) -0.0039(11) 0.0156(14) -0.0012(11)
 C 0.0634(16) 0.0421(14) 0.0620(17) -0.0011(12) 0.0312(15) 0.0004(12)
 C7BA 0.0545(15) 0.0453(15) 0.0648(18) 0.0004(13) 0.0239(15) 0.0023(11)
 C4 0.0471(13) 0.0442(14) 0.0681(18) 0.0064(13) 0.0234(14) 0.0075(10)
 C2AA 0.0458(12) 0.0379(13) 0.0542(14) -0.0008(11) 0.0194(12) 0.0016(10)
 C8AA 0.087(2) 0.0348(13) 0.0649(18) -0.0003(12) 0.0342(17) -0.0032(13)
 C6 0.0765(18) 0.0427(15) 0.0612(17) 0.0075(13) 0.0279(16) 0.0057(13)
 C7 0.0585(17) 0.070(2) 0.0641(19) 0.0126(16) 0.0171(16) 0.0105(14)
 C3AA 0.0492(13) 0.0422(14) 0.0580(15) 0.0022(11) 0.0172(13) 0.0031(10)
 C8 0.080(2) 0.0421(16) 0.0582(17) -0.0036(14) 0.0118(17) -0.0028(14)
 C5BA 0.0614(16) 0.0461(16) 0.087(2) -0.0051(16) 0.0256(17) 0.0015(13)
 C2BA 0.0625(17) 0.0599(18) 0.070(2) 0.0025(15) 0.0220(17) -0.0020(14)
 C11 0.0622(16) 0.0427(15) 0.0629(18) 0.0025(13) 0.0227(15) -0.0040(12)
 C2 0.0716(19) 0.0527(18) 0.073(2) 0.0147(15) 0.0262(18) 0.0068(15)
 C12 0.0604(17) 0.0452(16) 0.079(2) -0.0012(15) 0.0183(17) -0.0015(13)
 C3BA 0.0641(16) 0.0432(15) 0.0699(19) 0.0044(13) 0.0284(16) 0.0020(12)
 C6AA 0.0635(18) 0.0561(19) 0.081(2) 0.0047(17) 0.0173(19) 0.0006(14)
 C5 0.0589(15) 0.0389(14) 0.0706(18) -0.0074(13) 0.0210(15) -0.0092(12)
 C15 0.095(3) 0.065(2) 0.138(4) 0.008(2) 0.071(3) 0.004(2)
 C5AA 0.076(2) 0.0483(16) 0.0541(17) 0.0035(13) 0.0219(17) -0.0056(14)
 C17 0.0567(16) 0.0467(16) 0.073(2) 0.0093(14) 0.0110(16) 0.0031(12)
 C9 0.0496(14) 0.0419(14) 0.076(2) 0.0072(13) 0.0237(15) 0.0009(11)
 C10 0.110(3) 0.0475(18) 0.0612(19) 0.0077(15) 0.021(2) 0.0002(18)
 C18 0.0578(16) 0.069(2) 0.077(2) -0.0081(18) 0.0210(18) -0.0024(15)
 C19 0.088(3) 0.083(3) 0.088(3) -0.019(2) 0.042(2) -0.021(2)
 C13 0.076(2) 0.0445(16) 0.070(2) 0.0084(15) 0.0229(18) -0.0006(14)
 C14 0.0545(15) 0.0427(15) 0.0708(19) 0.0102(13) 0.0244(15) 0.0003(12)
 C1A 0.0596(17) 0.0562(18) 0.075(2) 0.0045(16) 0.0084(17) 0.0004(14)
 C16 0.079(2) 0.0504(18) 0.0608(19) 0.0026(14) 0.0042(19) -0.0037(15)
 C1B 0.208(7) 0.086(3) 0.060(2) -0.021(2) 0.052(4) 0.003(4)
 C1C 0.172(6) 0.083(3) 0.092(3) -0.007(3) 0.081(4) -0.025(3)
 C1D 0.105(3) 0.071(2) 0.066(2) -0.0200(19) 0.010(2) -0.006(2)
 C1E 0.076(2) 0.0536(19) 0.091(3) -0.0161(18) 0.025(2) -0.0011(16)
 C1F 0.084(3) 0.118(4) 0.071(2) 0.008(3) -0.001(2) -0.007(3)
 C1G 0.199(7) 0.065(3) 0.123(4) -0.003(3) 0.114(5) 0.007(3)
 C1H 0.111(4) 0.097(4) 0.139(5) -0.029(3) 0.073(4) -0.025(3)
 C1I 0.114(3) 0.075(3) 0.074(2) 0.025(2) 0.034(2) 0.012(2)
 C1J 0.083(3) 0.119(4) 0.087(3) 0.001(3) 0.003(3) 0.005(3)
 C1K 0.154(5) 0.098(4) 0.078(3) 0.019(3) 0.056(3) 0.002(3)

_geom_special_details
;
 All esds (except the esd in the dihedral angle between two l.s. planes)
 are estimated using the full covariance matrix.  The cell esds are taken
 into account individually in the estimation of esds in distances, angles
 and torsion angles; correlations between esds in cell parameters are only
 used when they are defined by crystal symmetry.  An approximate (isotropic)
 treatment of cell esds is used for estimating esds involving l.s. planes.
;
loop_
  _geom_bond_atom_site_label_1
  _geom_bond_atom_site_label_2
  _geom_bond_distance
  _geom_bond_site_symmetry_2
  _geom_bond_publ_flag
 O1 C0AA 1.391(4) . ?
 O1 C1BA 1.383(4) . ?
 O1 C5 1.468(4) . ?
 O2 C11 1.213(4) . ?
 N C6 1.464(4) . ?
 N C11 1.374(4) . ?
 N C5AA 1.386(4) . ?
 O4 C1BA 1.208(4) . ?
 O5 C13 1.215(4) . ?
 O6 C0AA 1.203(4) . ?
 C9AA C4BA 1.342(4) . ?
 C9AA C2AA 1.500(4) . ?
 C9AA C8 1.475(4) . ?
 O8 C7 1.373(4) . ?
 O8 C1F 1.416(6) . ?
 C0AA C4AA 1.503(4) . ?
 O10 C8 1.208(4) . ?
 C0BA C6BA 1.566(5) . ?
 C0BA C7BA 1.544(4) . ?
 C0BA C10 1.535(5) . ?
 C4AA C1AA 1.535(4) . ?
 C4AA C2AA 1.580(4) . ?
 C6BA C 1.555(4) . ?
 C6BA C14 1.501(4) . ?
 C4BA C4 1.448(5) . ?
 C1AA C1BA 1.504(4) . ?
 C1AA C3AA 1.555(4) . ?
 C1 C5BA 1.408(5) . ?
 C1 C12 1.399(4) . ?
 C1 C9 1.439(5) . ?
 O7AA C18 1.353(4) . ?
 O7AA C1J 1.433(6) . ?
 O19 C5AA 1.208(4) . ?
 C3 C2BA 1.382(4) . ?
 C3 C5 1.504(4) . ?
 C3 C1D 1.364(5) . ?
 C C7BA 1.529(5) . ?
 C C5AA 1.507(4) . ?
 C7BA C11 1.514(4) . ?
 C4 C3BA 1.407(4) . ?
 C4 C17 1.395(5) . ?
 C2AA C3AA 1.569(4) . ?
 C8AA C6 1.510(4) . ?
 C8AA C19 1.363(6) . ?
 C8AA C1I 1.384(5) . ?
 C7 C2 1.388(5) . ?
 C7 C1A 1.393(5) . ?
 C3AA C16 1.522(5) . ?
 C8 C16 1.512(5) . ?
 C5BA C1E 1.358(6) . ?
 C2BA C15 1.373(5) . ?
 C2 C3BA 1.364(5) . ?
 C12 C6AA 1.384(5) . ?
 C6AA C18 1.381(5) . ?
 C15 C1G 1.341(8) . ?
 C17 C1A 1.377(5) . ?
 C9 C14 1.346(5) . ?
 C10 C13 1.526(5) . ?
 C18 C1E 1.392(6) . ?
 C19 C1H 1.414(6) . ?
 C13 C14 1.475(5) . ?
 C1B C1D 1.415(8) . ?
 C1B C1G 1.350(9) . ?
 C1C C1H 1.391(8) . ?
 C1C C1K 1.321(8) . ?
 C1I C1K 1.361(6) . ?

loop_
  _geom_angle_atom_site_label_1
  _geom_angle_atom_site_label_2
  _geom_angle_atom_site_label_3
  _geom_angle
  _geom_angle_site_symmetry_1
  _geom_angle_site_symmetry_3
  _geom_angle_publ_flag
 C0AA O1 C5 122.4(3) . . ?
 C1BA O1 C0AA 113.5(2) . . ?
 C1BA O1 C5 124.0(2) . . ?
 C11 N C6 124.2(3) . . ?
 C11 N C5AA 114.1(3) . . ?
 C5AA N C6 121.6(3) . . ?
 C4BA C9AA C2AA 130.3(3) . . ?
 C4BA C9AA C8 119.9(3) . . ?
 C8 C9AA C2AA 109.4(2) . . ?
 C7 O8 C1F 118.2(4) . . ?
 O1 C0AA C4AA 107.7(2) . . ?
 O6 C0AA O1 123.7(3) . . ?
 O6 C0AA C4AA 128.6(3) . . ?
 C7BA C0BA C6BA 89.2(2) . . ?
 C10 C0BA C6BA 108.1(3) . . ?
 C10 C0BA C7BA 116.7(3) . . ?
 C0AA C4AA C1AA 105.3(2) . . ?
 C0AA C4AA C2AA 112.5(2) . . ?
 C1AA C4AA C2AA 90.0(2) . . ?
 C C6BA C0BA 89.3(2) . . ?
 C14 C6BA C0BA 106.0(3) . . ?
 C14 C6BA C 113.8(2) . . ?
 C9AA C4BA C4 130.8(3) . . ?
 C4AA C1AA C3AA 91.2(2) . . ?
 C1BA C1AA C4AA 105.0(2) . . ?
 C1BA C1AA C3AA 114.4(2) . . ?
 O1 C1BA C1AA 108.1(2) . . ?
 O4 C1BA O1 124.2(3) . . ?
 O4 C1BA C1AA 127.6(3) . . ?
 C5BA C1 C9 118.7(3) . . ?
 C12 C1 C5BA 116.2(3) . . ?
 C12 C1 C9 125.1(3) . . ?
 C18 O7AA C1J 118.9(4) . . ?
 C2BA C3 C5 121.2(3) . . ?
 C1D C3 C2BA 118.7(3) . . ?
 C1D C3 C5 120.0(3) . . ?
 C7BA C C6BA 90.2(2) . . ?
 C5AA C C6BA 116.3(2) . . ?
 C5AA C C7BA 105.0(2) . . ?
 C C7BA C0BA 91.1(2) . . ?
 C11 C7BA C0BA 115.1(2) . . ?
 C11 C7BA C 105.2(3) . . ?
 C3BA C4 C4BA 119.3(3) . . ?
 C17 C4 C4BA 123.8(3) . . ?
 C17 C4 C3BA 116.9(3) . . ?
 C9AA C2AA C4AA 118.8(2) . . ?
 C9AA C2AA C3AA 106.3(2) . . ?
 C3AA C2AA C4AA 89.0(2) . . ?
 C19 C8AA C6 121.7(3) . . ?
 C19 C8AA C1I 119.8(4) . . ?
 C1I C8AA C6 118.4(3) . . ?
 N C6 C8AA 110.7(2) . . ?
 O8 C7 C2 116.5(3) . . ?
 O8 C7 C1A 123.6(4) . . ?
 C2 C7 C1A 119.9(3) . . ?
 C1AA C3AA C2AA 89.7(2) . . ?
 C16 C3AA C1AA 116.0(3) . . ?
 C16 C3AA C2AA 107.3(2) . . ?
 C9AA C8 C16 110.0(3) . . ?
 O10 C8 C9AA 126.2(3) . . ?
 O10 C8 C16 123.7(3) . . ?
 C1E C5BA C1 121.7(3) . . ?
 C15 C2BA C3 120.5(4) . . ?
 O2 C11 N 124.3(3) . . ?
 O2 C11 C7BA 128.2(3) . . ?
 N C11 C7BA 107.5(3) . . ?
 C3BA C2 C7 120.3(3) . . ?
 C6AA C12 C1 122.3(3) . . ?
 C2 C3BA C4 121.5(3) . . ?
 C18 C6AA C12 119.6(3) . . ?
 O1 C5 C3 114.5(2) . . ?
 C1G C15 C2BA 121.0(5) . . ?
 N C5AA C 107.5(3) . . ?
 O19 C5AA N 123.5(3) . . ?
 O19 C5AA C 129.0(3) . . ?
 C1A C17 C4 122.4(3) . . ?
 C14 C9 C1 130.8(3) . . ?
 C13 C10 C0BA 105.5(3) . . ?
 O7AA C18 C6AA 124.3(4) . . ?
 O7AA C18 C1E 116.6(4) . . ?
 C6AA C18 C1E 119.1(4) . . ?
 C8AA C19 C1H 119.1(5) . . ?
 O5 C13 C10 123.3(3) . . ?
 O5 C13 C14 126.4(3) . . ?
 C14 C13 C10 110.2(3) . . ?
 C9 C14 C6BA 130.0(3) . . ?
 C9 C14 C13 120.1(3) . . ?
 C13 C14 C6BA 109.7(3) . . ?
 C17 C1A C7 118.9(3) . . ?
 C8 C16 C3AA 106.7(3) . . ?
 C1G C1B C1D 120.2(4) . . ?
 C1K C1C C1H 121.7(4) . . ?
 C3 C1D C1B 119.5(5) . . ?
 C5BA C1E C18 121.0(3) . . ?
 C15 C1G C1B 120.0(4) . . ?
 C1C C1H C19 118.3(5) . . ?
 C1K C1I C8AA 120.8(5) . . ?
 C1C C1K C1I 120.3(5) . . ?

_shelx_res_file
;
    cyc151228.res created by SHELXL-2014/7

TITL CF solution in P21
CELL 1.54184 7.924671 20.082772 12.83184 90 107.6249 90
ZERR 2 0.00015 0.000268 0.000267 0 0.0024 0
LATT -1
SYMM -X,0.5+Y,-Z
SFAC C H N O
UNIT 96 80 4 16

L.S. 20
PLAN  25
BOND
fmap 2
acta
REM <olex2.extras>
REM <HklSrc "%.\\cyc151228.hkl">
REM </olex2.extras>

WGHT    0.057400    0.158500
FVAR       3.02301
O1    3    0.831735    0.193032    0.880831    11.00000    0.05287    0.03747 =
         0.05869   -0.00049    0.02299   -0.00249
O2    4    0.589692    0.716947    1.009683    11.00000    0.09706    0.04676 =
         0.07263   -0.00127    0.01026   -0.01071
N     3    0.408406    0.679132    0.845741    11.00000    0.07050    0.04100 =
         0.05494    0.00528    0.02108   -0.00194
O4    4    1.026771    0.149546    1.036038    11.00000    0.08910    0.04588 =
         0.07425    0.01214    0.01476    0.00384
O5    4    0.586642    0.394054    1.105403    11.00000    0.10765    0.04791 =
         0.08509    0.01544    0.00364    0.00681
O6    4    0.622686    0.256300    0.758792    11.00000    0.06324    0.05812 =
         0.07185   -0.00044   -0.00180   -0.00165
C9AA  1    0.935550    0.419885    0.956182    11.00000    0.05267    0.03905 =
         0.05555   -0.00027    0.01875    0.00185
O8    4    0.471880    0.503161    0.452622    11.00000    0.08788    0.09019 =
         0.07124    0.02002    0.00660    0.00612
C0AA  1    0.731314    0.250316    0.847056    11.00000    0.04456    0.04329 =
         0.06594   -0.00018    0.02054   -0.00419
O10   4    1.068091    0.481155    1.120903    11.00000    0.16240    0.04814 =
         0.07061   -0.01512    0.00093    0.00113
C0BA  1    0.459249    0.565009    1.040809    11.00000    0.07397    0.04425 =
         0.06179    0.00380    0.03170    0.00555
AFIX  13
H0BA  2    0.394075    0.597067    1.071563    11.00000   -1.20000
AFIX   0

C4AA  1    0.787446    0.300407    0.938015    11.00000    0.04380    0.04373 =
         0.06567   -0.00437    0.02453    0.00135
AFIX  13
H4AA  2    0.690632    0.322546    0.957129    11.00000   -1.20000
AFIX   0

C6BA  1    0.339456    0.527037    0.938515    11.00000    0.05460    0.04331 =
         0.06877    0.00655    0.02815    0.00276
AFIX  13
H6BA  2    0.212533    0.536472    0.920595    11.00000   -1.20000
AFIX   0

C4BA  1    0.868715    0.473025    0.893987    11.00000    0.05312    0.04110 =
         0.06349   -0.00218    0.02150    0.00237
AFIX  43
H4BA  2    0.893353    0.513680    0.930121    11.00000   -1.20000
AFIX   0
C1AA  1    0.921680    0.263844    1.032302    11.00000    0.05930    0.04596 =
         0.04910    0.00059    0.02404   -0.00030
AFIX  13
H1AA  2    0.893670    0.264499    1.101629    11.00000   -1.20000
AFIX   0
C1BA  1    0.936861    0.195322    0.988677    11.00000    0.06167    0.04153 =
         0.05585    0.00629    0.02433   -0.00498

C1    1    0.231478    0.399071    0.776552    11.00000    0.04605    0.04469 =
         0.07629    0.00109    0.02474   -0.00179
O7AA  4   -0.044969    0.374984    0.446596    11.00000    0.09904    0.08525 =
         0.08116   -0.01293    0.01331   -0.00275
O19   4    0.212020    0.617404    0.713713    11.00000    0.11586    0.06346 =
         0.06598    0.01145   -0.00474   -0.01615
C3    1    0.929947    0.138354    0.733926    11.00000    0.06181    0.03415 =
         0.05517   -0.00390    0.01559   -0.00120
C     1    0.435482    0.563784    0.866005    11.00000    0.06335    0.04205 =
         0.06197   -0.00110    0.03120    0.00036
AFIX  13
H     2    0.495636    0.534161    0.827960    11.00000   -1.20000
AFIX   0
C7BA  1    0.558976    0.597417    0.967480    11.00000    0.05446    0.04528 =
         0.06480    0.00043    0.02391    0.00231
AFIX  13
H7BA  2    0.683319    0.584006    0.984742    11.00000   -1.20000
AFIX   0

C4    1    0.764654    0.477674    0.780035    11.00000    0.04710    0.04415 =
         0.06814    0.00642    0.02339    0.00752
C2AA  1    0.939215    0.347911    0.925807    11.00000    0.04576    0.03788 =
         0.05420   -0.00080    0.01937    0.00161
AFIX  13
H2AA  2    0.968505    0.341025    0.857668    11.00000   -1.20000
AFIX   0

C8AA  1    0.451590    0.746460    0.696993    11.00000    0.08734    0.03476 =
         0.06487   -0.00030    0.03422   -0.00323
C6    1    0.368368    0.742908    0.788308    11.00000    0.07651    0.04273 =
         0.06120    0.00750    0.02792    0.00572
AFIX  23
H6A   2    0.413061    0.778998    0.839466    11.00000   -1.20000
H6B   2    0.241101    0.748094    0.758407    11.00000   -1.20000
AFIX   0

C7    1    0.564231    0.492060    0.560401    11.00000    0.05852    0.07014 =
         0.06405    0.01265    0.01708    0.01046
C3AA  1    1.071315    0.312640    1.027092    11.00000    0.04919    0.04218 =
         0.05796    0.00224    0.01721    0.00314
AFIX  13
H3AA  2    1.171063    0.290874    1.010740    11.00000   -1.20000
AFIX   0
C8    1    1.042675    0.429167    1.071254    11.00000    0.08019    0.04210 =
         0.05818   -0.00362    0.01179   -0.00276

C5BA  1    0.204806    0.336694    0.723909    11.00000    0.06144    0.04611 =
         0.08727   -0.00510    0.02562    0.00149
AFIX  43
H5BA  2    0.252799    0.298845    0.763636    11.00000   -1.20000
AFIX   0

C2BA  1    1.106645    0.155924    0.772159    11.00000    0.06251    0.05985 =
         0.07012    0.00251    0.02200   -0.00198
AFIX  43
H2BA  2    1.155439    0.168862    0.844671    11.00000   -1.20000
AFIX   0

C11   1    0.527385    0.671350    0.948025    11.00000    0.06224    0.04274 =
         0.06294    0.00251    0.02275   -0.00399
C2    1    0.651398    0.546466    0.619332    11.00000    0.07159    0.05273 =
         0.07303    0.01474    0.02622    0.00684
AFIX  43
H2    2    0.643117    0.587872    0.585696    11.00000   -1.20000
AFIX   0

C12   1    0.152963    0.453781    0.712628    11.00000    0.06041    0.04520 =
         0.07945   -0.00119    0.01833   -0.00152
AFIX  43
H12   2    0.164055    0.495633    0.745031    11.00000   -1.20000
AFIX   0

C3BA  1    0.749161    0.539509    0.726345    11.00000    0.06409    0.04316 =
         0.06990    0.00439    0.02844    0.00200
AFIX  43
H3BA  2    0.806845    0.576446    0.764665    11.00000   -1.20000
AFIX   0

C6AA  1    0.059405    0.447794    0.602902    11.00000    0.06346    0.05606 =
         0.08065    0.00472    0.01732    0.00060
AFIX  43
H6AA  2    0.010439    0.485269    0.562405    11.00000   -1.20000
AFIX   0

C5    1    0.817467    0.134790    0.809488    11.00000    0.05886    0.03893 =
         0.07064   -0.00738    0.02097   -0.00917
AFIX  23
H5A   2    0.694700    0.129629    0.765849    11.00000   -1.20000
H5B   2    0.850711    0.095415    0.854867    11.00000   -1.20000
AFIX   0
C15   1    1.210693    0.154427    0.703926    11.00000    0.09545    0.06454 =
         0.13826    0.00839    0.07144    0.00411
AFIX  43
H15   2    1.329491    0.166216    0.730951    11.00000   -1.20000
AFIX   0

C5AA  1    0.335195    0.620006    0.796668    11.00000    0.07605    0.04834 =
         0.05413    0.00346    0.02187   -0.00559
C17   1    0.671620    0.424359    0.719588    11.00000    0.05670    0.04675 =
         0.07279    0.00931    0.01101    0.00306
AFIX  43
H17   2    0.676629    0.383189    0.753575    11.00000   -1.20000
AFIX   0

C9    1    0.339572    0.402478    0.888989    11.00000    0.04959    0.04189 =
         0.07561    0.00716    0.02371    0.00094
AFIX  43
H9    2    0.383017    0.361657    0.919859    11.00000   -1.20000
AFIX   0
C10   1    0.561411    0.513087    1.123907    11.00000    0.11029    0.04752 =
         0.06117    0.00770    0.02105    0.00022
C18   1    0.039127    0.385890    0.553850    11.00000    0.05783    0.06894 =
         0.07698   -0.00807    0.02096   -0.00239
C19   1    0.628263    0.736310    0.715370    11.00000    0.08767    0.08340 =
         0.08839   -0.01933    0.04188   -0.02145
AFIX  43
H19   2    0.701747    0.727096    0.785450    11.00000   -1.20000
AFIX   0
C13   1    0.518861    0.446119    1.065736    11.00000    0.07581    0.04447 =
         0.06958    0.00839    0.02293   -0.00061
C14   1    0.388313    0.454852    0.956942    11.00000    0.05448    0.04269 =
         0.07076    0.01022    0.02441    0.00033

C1A   1    0.572614    0.430411    0.611443    11.00000    0.05960    0.05615 =
         0.07460    0.00452    0.00838    0.00038
AFIX  43
H1A   2    0.512325    0.393920    0.573114    11.00000   -1.20000
AFIX   0
C16   1    1.126810    0.363870    1.118509    11.00000    0.07851    0.05041 =
         0.06080    0.00264    0.00420   -0.00367
C1B   1    0.970744    0.119975    0.558249    11.00000    0.20773    0.08590 =
         0.06003   -0.02057    0.05201    0.00347
AFIX  43
H1B   2    0.924186    0.107949    0.485142    11.00000   -1.20000
AFIX   0

C1C   1    0.582543    0.752789    0.522891    11.00000    0.17209    0.08268 =
         0.09204   -0.00657    0.08093   -0.02469
AFIX  43
H1C   2    0.627071    0.755692    0.463799    11.00000   -1.20000
AFIX   0

C1D   1    0.860156    0.121191    0.626572    11.00000    0.10530    0.07137 =
         0.06637   -0.01997    0.01033   -0.00566
AFIX  43
H1D   2    0.740827    0.110373    0.598505    11.00000   -1.20000
AFIX   0

C1E   1    0.110820    0.330380    0.616636    11.00000    0.07593    0.05359 =
         0.09088   -0.01608    0.02520   -0.00106
AFIX  43
H1E   2    0.094126    0.288363    0.584673    11.00000   -1.20000
AFIX   0

C1F   1    0.372166    0.449938    0.391705    11.00000    0.08382    0.11751 =
         0.07133    0.00828   -0.00104   -0.00730
AFIX 137
H1FA  2    0.306778    0.465423    0.320076    11.00000   -1.50000
H1FB  2    0.291390    0.433476    0.428301    11.00000   -1.50000
H1FC  2    0.450705    0.414822    0.385426    11.00000   -1.50000
AFIX   0
C1G   1    1.143648    0.136222    0.598869    11.00000    0.19893    0.06470 =
         0.12326   -0.00335    0.11427    0.00652
AFIX  43
H1G   2    1.216306    0.134790    0.553985    11.00000   -1.20000
AFIX   0

C1H   1    0.698336    0.739977    0.626435    11.00000    0.11119    0.09661 =
         0.13905   -0.02852    0.07278   -0.02516
AFIX  43
H1H   2    0.818707    0.733978    0.636898    11.00000   -1.20000
AFIX   0
C1I   1    0.342997    0.758283    0.591779    11.00000    0.11412    0.07520 =
         0.07370    0.02460    0.03373    0.01195
AFIX  43
H1I   2    0.222194    0.764483    0.579333    11.00000   -1.20000
AFIX   0
C1J   1   -0.130001    0.429749    0.379532    11.00000    0.08270    0.11856 =
         0.08717    0.00144    0.00314    0.00502
AFIX 137
H1JA  2   -0.191950    0.413863    0.307538    11.00000   -1.50000
H1JB  2   -0.042523    0.461776    0.375066    11.00000   -1.50000
H1JC  2   -0.212499    0.450300    0.411060    11.00000   -1.50000
AFIX   0
C1K   1    0.410952    0.760942    0.506304    11.00000    0.15364    0.09817 =
         0.07827    0.01943    0.05601    0.00235
AFIX  43
H1K   2    0.336288    0.768529    0.435946    11.00000   -1.20000
AFIX   0

H16A  2    1.077180    0.353370    1.176195    11.00000    0.07269
H10A  2    0.520652    0.512739    1.192594    11.00000    0.08124
H10B  2    0.700798    0.519720    1.152142    11.00000    0.09553
H16B  2    1.265312    0.371146    1.139518    11.00000    0.10159
HKLF 4

REM  CF solution in P21
REM R1 =  0.0371 for    5382 Fo > 4sig(Fo)  and  0.0405 for all    5841 data
REM    541 parameters refined using      1 restraints

END

WGHT      0.0554      0.1609

REM Highest difference peak  0.182,  deepest hole -0.119,  1-sigma level  0.026
Q1    1   0.8022  0.7195  0.6919  11.00000  0.05    0.18
Q2    1   0.9355  0.3854  0.9407  11.00000  0.05    0.13
Q3    1   0.5113  0.4016  1.1548  11.00000  0.05    0.13
Q4    1   0.7377  0.7512  0.5764  11.00000  0.05    0.12
Q5    1   0.4553  0.7609  0.5982  11.00000  0.05    0.12
Q6    1   0.8318  0.3347  0.9216  11.00000  0.05    0.12
Q7    1   0.9212  0.1550  1.0390  11.00000  0.05    0.11
Q8    1   0.9650  0.4488  0.9210  11.00000  0.05    0.11
Q9    1   0.8567  0.4341  0.9412  11.00000  0.05    0.11
Q10   1   0.2506  0.4307  0.7424  11.00000  0.05    0.11
Q11   1   1.0753  0.3931  1.0933  11.00000  0.05    0.11
Q12   1   0.4745  0.6060  1.0155  11.00000  0.05    0.11
Q13   1   1.1095  0.4641  1.0839  11.00000  0.05    0.11
Q14   1   1.0045  0.2865  1.0452  11.00000  0.05    0.10
Q15   1   0.5326  0.4800  1.1029  11.00000  0.05    0.10
Q16   1   1.0414  0.4685  1.1373  11.00000  0.05    0.10
Q17   1   0.2340  0.3704  0.7346  11.00000  0.05    0.10
Q18   1   0.6862  0.5165  1.0924  11.00000  0.05    0.09
Q19   1   0.7216  0.7054  0.8320  11.00000  0.05    0.09
Q20   1   0.9799  0.4262  1.0110  11.00000  0.05    0.09
Q21   1   0.4603  0.7744  0.8601  11.00000  0.05    0.09
Q22   1   0.8806  0.3451  0.8432  11.00000  0.05    0.09
Q23   1   0.3290  0.6101  0.7213  11.00000  0.05    0.09
Q24   1  -0.0888  0.5378  0.5814  11.00000  0.05    0.09
Q25   1   0.7670  0.4454  0.7454  11.00000  0.05    0.09
;
_shelx_res_checksum               16021
_shelx_hkl_file
;
   0   0   2 36042.5 1035.47   3
   0   0   3 7758.34 258.036  13
   0   0   3 8733.33 267.281   3
   0   0  -4 378.960 56.4411   5
   0   0  -4 363.932 49.3696   1
   0   0   4 351.201 43.5206  16
   0   0   4 363.219 38.3525   3
   0   0   4 349.605 33.7391  13
   0   0   5 950.854 77.1047  16
   0   0   5 890.031 65.0404   3
   0   0  -5 859.371 81.6493   1
   0   0   5 899.717 58.6537  13
   0   0  -5 768.291 84.1049   5
   0   0  -6 30707.3 951.154   1
   0   0  -6 29341.5 958.864   5
   0   0   6 30113.7 932.893  16
   0   0   6 28312.2 879.974  13
   0   0   7 4674.38 241.716  16
   0   0  -7 5358.08 267.103   1
   0   0  -8 774.637 106.896   1
   0   0   8 694.920 90.1823  16
   0   0  -9 746.456 114.082   1
   0   0  10 4.40599 10.6918  11
   0   0  11 185.306 17.4809  11
   0   0  12 3178.22 101.594  11
   0   0  13 22.7598 11.5284  11
   0   0  14 1.24396 8.88317  11
   0   0  15 6.91447 6.27767  11
   0  -1  -2 22.8080 20.0722   5
   0   1  -2 61.1692 21.7054   2
   0   1   2 21.4697 12.0856  13
   0   1   2 29.5572 13.4899   3
   0   1  -2 10.9991 17.7422   1
   0   1  -3 22738.5 676.554   1
   0  -1  -3 21878.1 681.541   5
   0   1   3 22155.8 657.277   3
   0   1   3 20946.7 653.684  13
   0  -1   3 22683.3 668.232  16
   0  -1   3 23548.6 666.344   3
   0   1   4 10865.0 349.103   3
   0   1   4 10566.9 345.711  13
   0  -1  -4 11118.9 383.603   1
   0   1   4 11429.1 374.361  16
   0  -1   4 11251.7 360.176   3
   0   1  -4 11418.6 393.041   5
   0  -1  -4 10713.9 383.111   5
   0   1  -4 10867.7 374.846   1
   0  -1   4 10573.7 364.307  16
   0  -1   5 10520.8 346.174  13
   0  -1  -5 9946.26 391.290   5
   0   1   5 10452.2 346.744   3
   0  -1  -5 10842.8 394.544   1
   0  -1   5 10882.1 375.281  16
   0   1  -5 10212.0 398.063   5
   0   1  -5 10097.7 380.909   1
   0  -1   5 10919.9 363.161   3
   0   1   5 10888.1 347.190  13
   0   1   5 10735.4 381.660  16
   0  -1   6 3989.88 164.932  13
   0  -1  -6 4016.56 214.517   1
   0   1   6 4282.12 167.906  13
   0   1  -6 3856.63 218.510   5
   0   1  -6 3945.83 205.527   1
   0   1   6 4084.30 203.777  16
   0  -1   6 4111.96 199.828  16
   0   1  -7 5592.60 292.061   5
   0  -1   7 5671.51 264.747  16
   0   1   7 5840.86 272.902  16
   0  -1  -7 5512.87 282.777   1
   0   1  -7 5385.83 272.848   1
   0  -1   8 3071.42 199.045  16
   0   1  -8 3330.70 215.854   1
   0  -1  -8 3137.19 216.144   1
   0   1   8 3054.81 199.781  16
   0  -1   9 170.398 62.4695  16
   0   1  -9 187.523 71.5927   1
   0  -1  -9 286.742 81.4946   1
   0  -1  10 145.080 14.4408  11
   0   1  10 134.683 14.5195  11
   0  -1  11 623.629 29.2434  11
   0   1  11 579.066 28.8373  11
   0  -1  12 73.2095 15.2842  11
   0   1  12 88.6119 15.5315  11
   0   1  13 92.3232 14.1971  11
   0  -1  13 109.433 14.2424  11
   0  -1  14 14.8389 9.77648  11
   0   1  14 9.22570 9.37940  11
   0  -1  15 79.6428 8.07098  11
   0   2   0 610.775 27.4298   4
   0  -2   2 17998.0 558.337  16
   0   2  -2 19373.4 571.465   2
   0   2   2 19203.6 554.706  13
   0   2  -3 2628.46 118.786   2
   0  -2   3 2478.48 107.193  16
   0   2  -3 2410.31 112.228   1
   0   2   3 2475.60 100.890   3
   0   2   3 2463.68 99.7494  13
   0  -2   4 51531.0 1545.01  17
   0   2   4 51954.8 1504.79   3
   0   2  -4 52542.7 1534.22   1
   0  -2   4 52669.7 1523.77  16
   0  -2   4 53072.9 1524.07   3
   0   2   4 50112.6 1533.58  16
   0  -2  -4 51628.5 1547.80   1
   0   2  -4 52800.8 1553.16   5
   0   2   4 52257.5 1505.83  13
   0  -2   5 10404.3 361.762  16
   0   2   5 10085.2 336.397  13
   0   2   5 10438.4 335.368   3
   0   2   5 9204.13 366.220  16
   0   2  -5 10444.6 373.621   1
   0   2  -5 10193.1 392.988   5
   0  -2  -5 9971.63 383.843   1
   0  -2   5 10441.5 357.036   3
   0   2  -6 26221.5 865.322   5
   0   2   6 26314.5 783.256  13
   0  -2  -6 25142.6 849.894   1
   0   2  -6 25957.9 836.202   1
   0   2   6 23395.7 825.867  16
   0  -2   6 26109.3 822.158  16
   0  -2   7 1764.49 129.706  16
   0  -2  -7 1675.65 143.938   1
   0   2  -7 1775.60 153.031   5
   0   2   7 1620.58 130.778  16
   0   2  -7 1640.49 134.573   1
   0   2  -8 595.578 101.487   5
   0   2  -8 780.300 103.604   1
   0  -2  -8 638.963 99.1322   1
   0  -2   8 497.335 79.6930  16
   0   2  -9 97.6805 58.9075   1
   0  -2  -9 196.605 75.0034   1
   0  -2   9 217.501 62.0225  16
   0  -2  10 147.970 13.2580  10
   0   2  10 172.333 15.6692  11
   0  -2  10 154.498 14.6473  11
   0   2  11 116.609 15.5932  11
   0  -2  11 89.9677 14.7030  11
   0   2  12 705.805 31.8671  11
   0  -2  12 680.363 31.7383  11
   0   2  13 130.581 14.8965  11
   0  -2  13 108.225 14.3859  11
   0  -2  14 43.9520 10.1534  11
   0   2  14 51.8655 10.2845  11
   0  -3   0 6.07235 12.5524  15
   0   3   0 21.8155 12.1220   4
   0  -3  -1 14670.9 444.989  15
   0   3  -1 14904.2 450.252   2
   0   3  -1 14312.6 419.869  14
   0   3  -1 15515.6 441.947   5
   0  -3   1 14785.2 441.261  15
   0  -3   2 38779.8 1110.51  16
   0   3  -2 39570.4 1127.64   2
   0   3   2 37064.6 1107.90  13
   0   3   3 3339.09 129.710  13
   0   3  -3 3286.74 148.111   2
   0  -3   3 3386.26 135.283  16
   0   3   4 4344.07 173.886  13
   0  -3  -4 4785.03 211.738   1
   0   3  -4 4873.82 202.487   2
   0  -3   4 4918.74 188.295  16
   0   3  -4 4922.90 211.936   5
   0  -3   4 4765.45 206.154  17
   0   3  -4 4580.05 193.203   1
   0  -3   5 4627.09 194.383   3
   0   3   5 4228.88 172.571  13
   0  -3  -5 4102.53 210.572   1
   0   3  -5 4511.32 200.437   1
   0   3  -5 4401.29 220.387   5
   0  -3   5 4425.64 211.600  17
   0  -3   5 4215.31 188.272  16
   0  -3   6 812.478 78.7222  16
   0  -3   6 889.338 78.0077   3
   0  -3  -6 749.297 91.2287   1
   0   3   6 615.366 57.4459  13
   0   3  -6 664.659 92.7154   5
   0   3  -6 796.449 82.3645   1
   0   3  -7 2161.73 155.887   1
   0  -3  -7 2168.68 170.268   1
   0  -3   7 2602.32 160.224  16
   0   3  -7 2324.81 181.116   5
   0  -3  -8 297.540 78.8598   1
   0  -3   8 228.067 56.0946  16
   0   3  -8 198.945 74.5985   5
   0   3  -8 187.581 59.6853   1
   0  -3  -9 134.084 70.4689   1
   0   3  -9 164.879 70.6030   1
   0  -3   9 151.254 54.0725  16
   0  -3  10 434.837 22.5583  11
   0  -3  10 390.797 20.5898  10
   0   3  10 399.068 22.9834  11
   0   3  11 698.265 31.9435  11
   0  -3  11 672.524 31.0269  11
   0  -3  12 420.877 24.1701  11
   0   3  12 458.351 25.1774  11
   0  -3  13 86.4028 13.4236  11
   0   3  13 93.6410 13.5511  11
   0   3  14 28.7813 8.95051  11
   0  -3  14 22.0666 9.29678  11
   0  -4   0 92252.7 2550.04  15
   0   4   0 90937.6 2538.44   4
   0   4   0 86116.8 2539.45   5
   0  -4  -1 3532.48 137.882  15
   0  -4  -1 3575.58 145.290   1
   0   4  -1 3530.22 133.209   5
   0   4  -1 3462.84 143.931   2
   0  -4   1 3789.48 136.711  15
   0   4  -2 2734.79 96.2405  14
   0   4   2 2983.52 117.059  13
   0   4  -2 2801.17 128.257   2
   0   4  -2 2723.99 122.636   5
   0  -4   2 2653.09 112.272  16
   0   4   3 1853.89 90.9534  13
   0  -4   3 1800.37 90.7949  16
   0   4  -3 1822.80 106.353   5
   0  -4   3 1642.84 99.4139  17
   0  -4  -3 1965.75 112.112   1
   0   4  -3 1885.54 107.812   2
   0  -4  -4 1852.42 122.493   1
   0   4  -4 1990.18 117.941   2
   0  -4   4 2054.41 120.440  17
   0   4   4 1874.35 96.3884  13
   0   4  -4 1802.52 118.077   5
   0  -4   4 1842.90 100.156  16
   0   4  -4 1822.20 106.527   1
   0   4  -5 446.914 71.5860   5
   0   4  -5 386.002 53.7072   1
   0   4  -5 330.713 54.0677   2
   0  -4   5 375.515 58.9160  17
   0  -4   5 382.914 48.3960  16
   0   4   5 436.609 46.2730  13
   0  -4  -5 418.069 67.2169   1
   0  -4   6 2503.80 144.366   3
   0  -4   6 2490.86 142.364  16
   0  -4  -6 2256.39 161.314   1
   0   4  -6 2471.26 174.098   5
   0   4   6 2202.00 122.354  13
   0   4  -6 2298.48 147.079   1
   0  -4  -7 388.449 80.1658   1
   0  -4   7 427.891 63.3456  16
   0   4  -7 473.613 73.6358   1
   0   4  -7 407.552 83.9132   5
   0  -4   8 1309.88 122.884  16
   0   4  -8 1551.80 161.299   5
   0  -4  -8 1318.39 146.516   1
   0   4  -8 1178.18 123.362   1
   0  -4  -9 270.412 78.9171   1
   0  -4   9 256.786 15.3708  10
   0  -4   9 266.437 69.3308  16
   0   4   9 261.115 17.6627  11
   0  -4   9 225.862 16.1033  11
   0  -4  10 346.111 19.5763  10
   0   4  10 399.384 22.8578  11
   0  -4  10 399.383 21.6943  11
   0  -4  11 515.370 26.3039  11
   0   4  11 485.895 26.6876  11
   0  -4  12 96.5725 15.0197  11
   0   4  12 86.0354 14.5408  11
   0   4  13 120.456 14.0516  11
   0  -4  13 123.029 13.9481  11
   0  -4  14 2.03272 8.33939  11
   0   4  14 11.0580 8.46568  11
   0  -5   0 19.8121 17.6816  15
   0   5   0 11.4636 15.8769   4
   0   5   0 21.6602 17.0163   5
   0   5   1 37227.8 1031.40   4
   0  -5  -1 33600.5 1046.34   1
   0  -5  -1 35411.7 1038.18  15
   0  -5   1 34431.7 1032.44  15
   0   5  -1 33980.4 1048.22   2
   0   5  -1 35430.4 1028.53   5
   0  -5   2 32254.2 915.447  15
   0  -5   2 31329.4 906.750  16
   0   5  -2 31796.2 918.125   5
   0  -5  -2 31932.1 922.909  15
   0  -5  -2 32990.3 937.635   1
   0  -5   2 32091.5 925.008  17
   0   5   2 33078.9 915.087  13
   0   5  -2 28248.2 869.526  14
   0   5  -2 32067.1 934.018   2
   0  -5   3 3142.53 135.077  16
   0   5  -3 3069.48 116.128  14
   0  -5  -3 2872.45 154.475   1
   0  -5   3 3179.64 150.545  17
   0   5  -3 3059.99 155.156   2
   0   5  -3 3214.04 152.919   5
   0   5   3 3302.02 138.976  13
   0  -5   4 22.5801 30.0694  17
   0   5   4 27.6638 23.9759  13
   0  -5  -4 17.8477 33.9768   1
   0  -5   4 40.7970 23.2332  16
   0   5  -4 69.3367 39.2513   5
   0   5  -4 42.7488 33.4802   2
   0   5  -5 175.668 54.2241   5
   0  -5   5 103.057 39.0826  17
   0   5  -5 145.276 38.3071   1
   0  -5  -5 136.243 51.0110   1
   0   5  -5 180.196 45.4703   2
   0  -5   5 158.469 36.9809  16
   0   5   5 194.458 35.8129  13
   0  -5   6 1528.33 107.933  16
   0  -5  -6 1448.32 130.494   1
   0   5   6 1303.24 93.1307  13
   0   5  -6 1624.74 117.934   1
   0   5  -6 1413.95 131.992   5
   0  -5   6 1301.23 118.639  17
   0  -5   6 1516.53 114.267   3
   0   5  -7 3905.10 214.291   1
   0  -5  -7 3614.63 235.555   1
   0   5  -7 3776.75 244.165   5
   0  -5   7 3809.80 203.661  16
   0  -5  -8 665.980 107.232   1
   0  -5   8 572.121 83.9820  16
   0   5  -8 553.995 106.542   5
   0  -5   9 1994.96 64.7074  10
   0  -5   9 1982.31 65.8029  11
   0   5   9 1981.49 67.1671  11
   0  -5  10 2884.09 92.1309  10
   0  -5  10 2969.21 93.6258  11
   0   5  10 2957.42 94.9095  11
   0  -5  11 1847.17 61.6888  10
   0  -5  11 1851.57 63.6141  11
   0   5  11 1832.00 64.7696  11
   0   5  12 310.117 20.5189  11
   0  -5  12 301.533 19.9443  11
   0   5  13 111.549 13.1470  11
   0  -5  13 99.6477 13.1082  11
   0   5  14 16.3225 8.31838  11
   0  -5  14 16.5120 8.47784  11
   0  -6   0 36886.2 1107.39  15
   0   6   0 37802.4 1093.93   4
   0  -6   0 37189.2 1117.33  17
   0   6   0 37925.0 1093.57   5
   0  -6   1 17896.4 563.135  17
   0  -6   1 17440.1 551.606  15
   0   6  -1 17853.5 545.310   5
   0   6  -1 18058.6 527.423   4
   0   6  -1 17487.6 572.123   2
   0  -6  -1 17363.7 554.705  15
   0   6   1 17376.1 545.125   4
   0  -6   2 2120.45 103.527  16
   0  -6  -2 2117.62 112.756  15
   0  -6   2 2202.86 117.472  17
   0   6   2 2045.95 109.763  13
   0  -6  -2 2094.48 122.942   1
   0  -6   2 2146.05 108.546  15
   0   6  -2 2151.30 109.992   5
   0   6  -2 2052.81 121.629   2
   0  -6  -3 13359.0 458.340  15
   0  -6   3 13513.8 437.498  16
   0   6  -3 12884.7 455.039   5
   0   6   3 13930.9 447.582  13
   0  -6   3 12944.4 456.587  17
   0  -6  -3 13636.3 474.886   1
   0   6  -3 13512.4 471.611   2
   0   6  -4 2781.17 157.590   5
   0   6   4 2711.09 135.853  13
   0  -6  -4 2440.23 156.061   1
   0  -6   4 2842.57 155.082  17
   0  -6   4 2543.35 130.386  16
   0   6  -4 2721.43 157.202   2
   0   6  -5 5357.48 233.839   1
   0  -6   5 5327.10 253.286  17
   0  -6   5 5420.10 225.373  16
   0   6  -5 5626.87 254.631   2
   0  -6  -5 4938.22 257.602   1
   0   6  -5 5057.71 257.425   5
   0   6   5 5200.03 222.961  13
   0  -6   6 1632.09 135.317  17
   0  -6   6 1828.97 131.770   3
   0   6   6 1565.47 108.339  13
   0   6  -6 1886.37 154.212   5
   0   6  -6 1661.83 121.807   1
   0  -6   6 1555.97 112.331  16
   0  -6  -6 1460.89 137.737   1
   0   6  -7 2090.30 149.598   1
   0  -6   7 1996.34 140.532  16
   0   6  -7 2173.12 181.733   5
   0  -6  -7 1765.12 163.543   1
   0  -6   8 1150.00 114.930  16
   0  -6  -8 864.176 126.213   1
   0   6  -8 973.981 137.100   5
   0  -6   9 3646.73 110.121  11
   0   6   9 3576.50 111.576  11
   0  -6   9 3459.47 108.632  10
   0  -6  10 501.284 25.0900  11
   0   6  10 496.995 26.5383  11
   0  -6  10 475.181 23.1217  10
   0   6  11 345.880 22.5761  11
   0  -6  11 335.097 18.9887  10
   0  -6  11 340.439 21.1801  11
   0   6  12 96.5233 14.3494  11
   0  -6  12 107.950 14.2907  11
   0   6  13 61.0029 11.2829  11
   0  -6  13 47.8059 11.0103  11
   0  -6  14 20.4272 7.99786  11
   0   6  14 20.4196 7.80163  11
   0   7   0 10.5591 19.3376   4
   0  -7   0 10.1056 26.1190  17
   0   7   0 27.4955 30.9724   2
   0  -7   0 0.86142 21.0371  15
   0   7   0 6.24142 17.8632   5
   0   7   1 28762.7 867.509  13
   0  -7   1 27828.3 850.865  15
   0  -7   1 28875.0 869.161  17
   0   7  -1 26878.3 875.262   2
   0   7  -1 27314.6 842.579   5
   0   7   1 28873.7 846.189   4
   0  -7  -1 27791.1 855.438  15
   0  -7  -2 5411.38 239.566   1
   0   7  -2 5530.82 242.339   2
   0  -7   2 5155.13 215.139  15
   0   7   2 5702.11 222.483   4
   0   7  -2 5502.50 219.654   5
   0   7   2 5936.11 230.357  13
   0  -7   2 6059.36 236.489  17
   0  -7  -2 5498.63 225.678  15
   0  -7  -3 3470.71 184.580   1
   0   7   3 3284.08 161.808  13
   0  -7   3 3265.87 150.100  16
   0  -7  -3 3152.82 164.505  15
   0   7  -3 3360.51 167.669   5
   0  -7   3 3463.33 171.827  17
   0   7  -3 3492.92 183.706   2
   0  -7   4 9828.33 384.223  17
   0  -7   4 10061.7 357.246  16
   0   7   4 10373.9 370.818  13
   0   7  -4 10645.2 402.197   2
   0  -7  -4 9779.15 382.801  15
   0  -7  -4 9594.15 399.052   1
   0   7  -4 10072.4 388.615   5
   0   7   5 2514.70 141.476  13
   0   7  -5 2448.19 165.122   5
   0  -7   5 2206.13 131.198  16
   0   7  -5 2301.80 138.885   1
   0  -7  -5 2256.29 165.593   1
   0  -7   5 2243.51 154.348  17
   0  -7  -5 2243.21 154.242  15
   0   7  -5 2631.13 165.482   2
   0  -7  -6 7258.18 361.481   1
   0   7   6 7487.93 313.509  13
   0  -7   6 7766.08 314.540  16
   0   7  -6 8044.79 327.368   1
   0  -7  -6 7913.87 355.218  15
   0  -7   6 7574.40 352.493  17
   0   7  -6 8062.29 371.395   5
   0  -7   7 2104.35 144.651  16
   0  -7   7 2134.28 173.137  17
   0   7  -7 2073.29 184.901   5
   0  -7  -7 1908.58 175.999   1
   0  -7  -8 189.922 71.6349   1
   0   7  -8 486.840 99.7892   5
   0  -7  -8 340.484 80.3721  15
   0  -7   9 990.168 38.1083  11
   0  -7   9 986.206 36.8630  10
   0   7   9 949.669 39.2516  11
   0  -7  10 122.065 12.6755  10
   0   7  10 151.627 16.9360  11
   0  -7  10 141.224 15.4390  11
   0  -7  11 1963.76 65.8775  10
   0  -7  11 2127.24 68.3706  11
   0   7  11 1975.70 69.2154  11
   0  -7  12 97.7324 13.3987  11
   0   7  12 109.700 14.0414  11
   0   7  13 64.9850 10.7533  11
   0  -7  13 84.7665 11.4199  11
   0  -7  14 57.6042 8.35876  11
   0   7  14 46.1676 7.37565  11
   0  -8   0 31766.0 1004.92  15
   0  -8   0 32805.6 1021.97  17
   0   8   0 33177.1 1039.95   2
   0   8   0 33675.9 989.565   5
   0   8   0 34468.8 992.492   4
   0   8   1 33547.8 1020.77  13
   0  -8   1 32494.8 996.108  15
   0  -8  -1 32806.4 1001.16  15
   0   8  -1 31135.6 1026.07   2
   0   8   1 33175.7 989.027   4
   0  -8  -1 31677.5 1011.31  17
   0  -8   1 32932.3 1014.71  17
   0   8  -1 33436.1 988.186   5
   0   8   1 33542.3 973.645   5
   0  -8  -2 6204.92 254.635  15
   0  -8   2 6382.13 248.810  15
   0  -8   2 6595.03 265.931  17
   0   8   2 6386.63 249.984   4
   0   8   2 5928.59 257.718  13
   0   8  -2 6248.62 249.454   5
   0   8  -2 6689.30 280.409   2
   0   8   3 33160.5 1004.64   4
   0  -8   3 32749.1 1012.14  17
   0  -8  -3 31616.6 1027.60   1
   0   8  -3 32110.5 1002.96   5
   0  -8  -3 32174.6 1005.45  15
   0   8   3 32374.8 1002.59  13
   0   8  -3 31702.5 1029.48   2
   0  -8   3 31294.3 977.981  16
   0   8  -4 4321.61 218.355   5
   0   8   4 4101.87 202.273  13
   0  -8   4 4251.32 214.630  17
   0  -8  -4 4166.82 230.095   1
   0  -8  -4 3968.83 209.194  15
   0   8  -4 4224.59 227.658   2
   0  -8   4 4183.70 189.061  16
   0  -8  -5 580.415 79.4531  15
   0   8  -5 648.626 87.9504   2
   0   8  -5 630.718 71.5295   1
   0  -8   5 630.632 68.0112  16
   0   8   5 554.273 71.7065  13
   0  -8   5 561.789 79.5202  17
   0   8  -5 537.736 84.0830   5
   0  -8  -5 553.582 88.5032   1
   0  -8  -6 1580.94 152.520   1
   0   8   6 1521.36 119.991  13
   0  -8  -6 1623.33 140.622  15
   0   8  -6 1446.85 145.488   5
   0  -8   6 1556.96 116.089  16
   0  -8   6 1511.40 138.197  17
   0  -8  -7 1090.29 137.574   1
   0  -8  -7 1416.09 143.924  15
   0  -8   7 1115.63 129.658  17
   0   8  -7 1372.89 153.013   5
   0  -8  -8 515.403 107.524   1
   0   8  -8 481.987 100.145   5
   0  -8   8 539.539 23.5892  10
   0  -8   8 591.375 25.3627  11
   0  -8  -8 563.443 98.9097  15
   0  -8   9 4450.16 135.524  10
   0  -8   9 4661.69 137.116  11
   0   8   9 4391.96 138.529  11
   0   8  10 682.433 31.0582  11
   0  -8  10 641.248 29.0478  11
   0  -8  10 640.403 27.5438  10
   0  -8  11 409.601 22.3647  11
   0   8  11 382.170 22.9403  11
   0  -8  11 342.333 18.8035  10
   0  -8  12 33.1543 11.6037  11
   0   8  12 23.4348 10.6554  11
   0  -8  13 87.7071 11.1425  11
   0   8  13 85.4418 10.6159  11
   0  -8  14 50.2149 7.51048  11
   0  -9   0-15.7609 29.6883  17
   0   9   0 5.45394 35.2889   2
   0   9   0 8.90691 20.4615   5
   0  -9   0-1.00985 22.8245  15
   0   9   1 1170.39 72.8309   5
   0  -9  -1 1163.41 89.1593  15
   0   9  -1 1316.95 85.4055   5
   0  -9   1 1142.85 85.6038  15
   0   9   1 1306.41 86.1805   4
   0  -9  -1 1052.22 90.7307  17
   0  -9   1 1316.97 100.802  17
   0   9  -1 1089.39 102.041   2
   0   9   2 307.663 57.1414  13
   0   9   2 232.492 43.1183   4
   0   9  -2 277.096 59.3747   2
   0  -9   2 311.306 46.5793  15
   0  -9  -2 305.733 49.3416  15
   0   9  -2 347.412 51.2427   5
   0  -9   2 266.144 52.9126  17
   0   9  -3 24633.7 796.519   5
   0  -9   3 24068.9 770.114  16
   0   9   3 23058.9 796.542  13
   0  -9   3 24684.9 807.473  17
   0  -9  -3 24797.8 799.305  15
   0   9   3 24913.9 793.663   4
   0   9  -3 25371.0 834.747   2
   0  -9  -3 24396.1 825.899   1
   0  -9  -4 4004.88 237.405   1
   0  -9  -4 4023.11 217.636  15
   0  -9   4 4268.43 225.603  17
   0  -9   4 4377.13 199.494  16
   0   9  -4 4366.00 228.018   5
   0   9   4 4675.76 228.811   4
   0   9   4 4108.85 216.623  13
   0  -9  -5 1441.92 143.084   1
   0  -9   5 1762.53 141.931  17
   0   9   5 1853.87 145.330   4
   0  -9  -5 1645.99 135.838  15
   0   9   5 1567.49 125.990  13
   0  -9   5 1661.39 114.392  16
   0   9  -5 1583.77 140.282   5
   0   9   6 863.257 110.766   4
   0  -9   6 772.598 104.157  17
   0  -9  -6 836.130 103.405  15
   0   9   6 792.826 92.2927  13
   0  -9  -6 760.980 114.477   1
   0   9  -6 690.358 106.718   5
   0  -9  -7 283.181 78.6113   1
   0  -9  -7 187.184 67.6582  15
   0  -9   7 362.250 84.3461  17
   0   9  -7 212.562 74.7590   5
   0   9   7 207.840 67.8433   4
   0   9   8 1108.33 43.5623  11
   0  -9   8 1191.57 42.0764  11
   0  -9   8 1137.79 40.7411  10
   0  -9   9 819.358 32.4254  10
   0   9   9 782.955 35.6171  11
   0  -9   9 891.978 34.5522  11
   0  -9  10 187.102 16.2699  11
   0   9  10 183.806 17.4769  11
   0  -9  10 175.531 13.7735  10
   0   9  11 763.115 33.0006  11
   0  -9  11 734.774 29.7919  10
   0  -9  11 780.849 32.1456  11
   0   9  12 30.7839 10.3995  11
   0  -9  12 24.0955 10.2688  11
   0  -9  13 73.5276 9.73367  11
   0 -10   0 20158.5 686.260  15
   0  10   0 21612.6 737.963   2
   0 -10   0 21334.9 710.886  17
   0  10   0 22023.5 667.721   5
   0  10   1 6307.33 299.233   2
   0 -10  -1 6602.19 268.956  15
   0 -10   1 6159.95 260.762  15
   0 -10   1 6634.68 285.861  17
   0  10  -1 6059.79 296.910   2
   0  10  -1 6764.75 257.219   5
   0 -10  -1 6731.45 285.319  17
   0  10  -2 10659.8 389.205   5
   0  10  -2 10315.2 429.003   2
   0 -10  -2 10498.1 392.712  15
   0 -10   2 10728.0 408.872  17
   0  10   2 10287.1 411.343  13
   0 -10  -2 10470.8 406.834  17
   0  10   2 10354.6 384.315   4
   0 -10   2 10314.9 384.064  15
   0 -10  -3 20080.1 655.376  15
   0  10   3 18826.4 660.203  13
   0  10  -3 18901.9 687.444   2
   0  10   3 18670.3 643.489   4
   0 -10   3 19319.5 661.944  17
   0  10  -3 18620.6 646.082   5
   0 -10   3 18127.5 619.831  16
   0  10   4 1943.70 143.712   4
   0 -10   4 1996.35 125.697  16
   0 -10  -4 1913.50 141.781  15
   0 -10   4 2065.67 149.763  17
   0  10  -4 1859.06 144.918   5
   0  10   4 1909.08 144.144  13
   0  10  -4 2120.00 167.349   2
   0 -10  -4 1946.26 159.836   1
   0 -10  -5 1453.16 146.315   1
   0 -10  -5 1572.15 134.440  15
   0 -10   5 1471.73 134.471  17
   0  10   5 1448.75 135.004   4
   0  10  -5 1450.68 139.100   5
   0  10   5 1449.10 129.223  13
   0  10   6 920.490 105.586  13
   0 -10  -6 783.590 118.957   1
   0  10   6 933.720 117.480   4
   0  10  -6 768.881 115.743   5
   0 -10  -6 794.356 106.445  15
   0 -10   6 938.957 115.631  17
   0  10   7 840.061 121.703   4
   0 -10  -7 1081.71 132.283  15
   0 -10  -7 1060.57 143.277   1
   0  10  -7 1087.03 142.296   5
   0 -10   7 1146.49 137.205  17
   0 -10   8 92.1466 10.2320  10
   0 -10   8 71.9527 11.9177  11
   0  10   8 83.6705 13.8703  11
   0  10   9 7644.02 227.519  11
   0 -10   9 7777.00 225.627  11
   0 -10   9 7580.37 224.247  10
   0 -10  10 357.224 20.4652  11
   0 -10  10 331.397 18.2277  10
   0  10  10 347.634 21.6071  11
   0 -10  11 946.106 36.0712  11
   0 -10  11 895.484 33.9142  10
   0  10  11 956.218 37.3364  11
   0 -10  12 19.1483 9.34579  11
   0  10  12 16.6334 8.72064  11
   0 -10  13 36.1205 7.99404  11
   0 -11   0-17.6666 27.2076  15
   0  11   0 11.1896 40.8394   2
   0 -11   0-11.4599 33.0444  17
   0 -11   1 282.063 49.9429  15
   0 -11   1 270.068 54.1632  17
   0  11   1 289.888 67.0460   2
   0  11  -1 245.534 46.4815   5
   0 -11  -1 318.257 51.9264  15
   0 -11  -1 290.103 55.2396  17
   0  11  -1 224.634 62.4440   2
   0 -11   2 13.6181 24.4391  15
   0 -11  -2 20.1409 32.6434  15
   0 -11   2-1.19029 28.0631  17
   0  11  -2 14.4578 41.1938   2
   0 -11  -2-5.53769 33.9789  17
   0  11  -2 13.2217 31.8755   5
   0  11  -3 6234.78 279.517   5
   0 -11   3 6059.05 255.703  16
   0  11  -3 5928.35 312.080   2
   0 -11   3 6079.07 289.574  17
   0  11   3 5565.74 285.494  13
   0 -11  -3 5505.36 268.120  15
   0  11  -4 2598.69 198.986   2
   0  11  -4 2578.78 178.118   5
   0  11   4 2586.14 173.436   4
   0 -11   4 2721.93 183.105  17
   0  11   4 2448.48 177.285  13
   0 -11  -4 2518.84 170.655  15
   0  11  -5 208.538 71.0476   5
   0  11   5 121.363 52.2177  13
   0  11   5 211.503 63.0878   4
   0 -11  -5 144.309 50.1739  15
   0 -11   5 151.156 56.0629  17
   0  11   6 675.305 106.342   4
   0 -11   6 680.889 106.267  17
   0  11  -6 659.603 111.538   5
   0 -11  -6 564.770 104.083   1
   0  11   6 609.810 96.5794  13
   0 -11  -6 572.292 96.7322  15
   0 -11   7 691.977 28.1876  10
   0  11  -7 675.896 31.5572   7
   0 -11   8 738.295 29.9945  11
   0 -11   8 674.017 28.1736  10
   0  11   9 66.8792 13.6424  11
   0 -11   9 61.1675 12.5490  11
   0 -11   9 53.9046 9.72476  10
   0 -11  10 273.363 17.5456  11
   0  11  10 237.905 17.9550  11
   0 -11  10 278.913 15.7540  10
   0 -11  11 138.852 11.2899  10
   0 -11  11 157.585 13.5334  11
   0 -11  12 34.6377 9.01233  11
   0 -11  13 21.9842 6.68966  11
   0 -12   0 1118.13 109.947  17
   0 -12   0 1178.13 99.2016  15
   0  12   0 1023.71 117.762   2
   0 -12   1 230.716 54.8215  17
   0  12  -1 124.045 52.8205   2
   0  12   1 265.900 68.2215   2
   0 -12  -1 175.862 44.5776  15
   0 -12   1 248.269 47.4612  15
   0 -12  -1 122.405 49.3006  17
   0 -12  -2 1994.57 138.579  15
   0 -12  -2 2096.65 155.149  17
   0  12   2 1595.17 154.065   2
   0 -12   2 1914.62 148.968  17
   0  12  -2 2088.54 173.577   2
   0 -12   2 1956.53 132.279  15
   0 -12  -3 946.465 98.0433  15
   0  12  -3 784.824 94.7605   5
   0 -12  -3 860.797 103.033  17
   0  12  -3 727.816 109.318   2
   0 -12   3 905.469 104.863  17
   0  12  -4 606.443 105.970   2
   0 -12   4 859.924 105.638  17
   0 -12  -4 756.430 95.0867  15
   0  12  -4 696.545 98.2840   5
   0  12  -5 349.671 82.0115   5
   0 -12   5 571.685 93.4555  17
   0 -12   6 48.1836 47.5550  17
   0 -12   6 5.76635 6.52439  10
   0  12  -6 8.87656 10.3802   7
   0  12  -6 15.1655 54.7130   5
   0 -12   7 157.626 13.6257  11
   0 -12   7 153.246 12.0010  10
   0  12  -7 146.128 15.2108   7
   0 -12   8 134.505 13.5524  11
   0 -12   8 137.107 12.0689  10
   0 -12   9 1674.46 56.5000  10
   0 -12   9 1745.31 58.1586  11
   0 -12  10 190.053 14.9424  11
   0 -12  10 185.234 12.6569  10
   0 -12  11 563.717 23.6865  11
   0 -12  11 504.303 21.1625  10
   0 -12  12 60.3358 8.56032  11
   0 -13   0 3.27771 26.8047  15
   0 -13   0-5.30866 35.6223  17
   0  13   0-3.33537 49.8517   2
   0  13   1 239.688 70.0661   2
   0  13  -1 117.128 63.7190   2
   0 -13   1 299.159 64.7737  17
   0 -13  -1 278.391 64.9013  17
   0 -13   1 223.940 49.2821  15
   0  13  -2 168.808 66.5945   2
   0 -13   2 251.755 61.7947  17
   0 -13  -2 323.032 67.3199  17
   0  13   2 235.835 73.8682   2
   0  13  -3 1752.52 170.243   2
   0 -13  -3 1404.50 138.842  17
   0  13   3 1320.56 148.221   2
   0 -13   3 1473.73 139.264  17
   0 -13  -4 1306.27 135.578  17
   0  13   4 1270.81 151.740   2
   0 -13   4 1414.10 143.080  17
   0 -13   5 628.480 100.421  17
   0  13   5 501.292 102.220   2
   0 -13   6 558.763 24.1113  10
   0  13  -6 616.043 28.7062   7
   0 -13   7 942.448 36.5827  10
   0  13  -7 1009.54 41.1773   7
   0 -13   8 1342.84 47.2758  10
   0 -13   8 1448.93 49.1312  11
   0 -13   9 131.020 11.6679  10
   0 -13   9 161.861 13.7573  11
   0 -13  10 121.280 12.2505  11
   0 -13  10 107.963 9.91879  10
   0 -13  11 39.2329 8.49646  11
   0 -13  11 42.1256 7.09877  10
   0 -13  12 54.3481 7.36448  11
   0 -14   0 4777.84 270.371  17
   0  14   0 4676.22 300.042   2
   0  14  -1 21.6022 56.4110   2
   0 -14   1 60.4766 46.6861  17
   0  14   1 34.5210 49.0157   2
   0 -14  -1 54.6671 42.9630  17
   0 -14   2 3204.35 214.865  17
   0  14  -2 3118.90 240.746   2
   0 -14  -2 2935.76 206.069  17
   0  14   2 2453.44 215.965   2
   0 -14   3 2195.75 178.373  17
   0 -14  -3 2163.33 179.259  17
   0  14   3 2171.26 197.581   2
   0  14  -3 2072.76 201.653   2
   0  14  -4 392.758 22.5199   7
   0 -14  -4 489.568 92.9158  17
   0  14   4 407.055 97.2763   2
   0 -14   4 418.146 81.7038  17
   0  14   4 419.726 23.8778   6
   0 -14   5 218.693 13.6057  10
   0  14  -5 195.510 16.6030   7
   0 -14   6-5.25854 7.06593  10
   0  14  -6 16.5738 10.8213   7
   0  14  -7 137.388 15.2373   7
   0 -14   7 145.000 11.7342  10
   0 -14   7 164.385 13.5412  11
   0 -14   8 1081.71 39.4633  10
   0 -14   8 1168.00 40.8192  11
   0 -14   9 184.793 12.5644  10
   0 -14   9 193.762 13.9206  11
   0 -14  10 255.499 13.3920  10
   0 -14  10 272.223 15.2204  11
   0 -14  11 178.134 11.5244  11
   0  14  12 21.8455 7.11160   6
   0 -15   0 17.1510 44.6308  17
   0  15   0 31.0941 52.9176   2
   0 -15  -1 8696.21 410.570  17
   0 -15   1 8032.72 399.476  17
   0  15  -1 8533.42 449.302   2
   0  15   1 9154.30 460.236   2
   0  15  -2 306.205 20.2720   6
   0  15   2 289.295 20.1311   6
   0  15  -2 323.104 93.6217   2
   0 -15   2 230.343 66.7733  17
   0 -15  -2 393.332 80.7752  17
   0  15  -2 307.883 19.5469   7
   0  15   2 322.261 92.0277   2
   0  15  -3 426.683 119.905   2
   0  15   3 508.132 26.1192   6
   0  15  -3 436.900 24.1941   7
   0  15  -3 453.970 25.2633   6
   0  15   4 304.608 20.9742   6
   0  15  -4 284.355 19.6064   7
   0 -15   5 1634.07 55.6266  10
   0  15  -5 1737.12 60.7721   7
   0  15   5 1756.23 62.4540   6
   0  15  -6 129.759 14.6132   7
   0 -15   6 91.8619 10.2146  10
   0  15  -7 14.5245 11.3033   7
   0 -15   7 20.9590 7.19533  10
   0 -15   8-4.62889 7.00859  10
   0 -15   9 261.146 13.5571  10
   0 -15   9 245.802 14.8371  11
   0  15  10 39.5160 11.4537   6
   0  15  11 216.055 14.3632   6
   0  16   0 3266.98 105.450   6
   0  16  -1 1803.15 64.5387   7
   0  16  -1 1850.72 65.5104   6
   0  16   1 1902.74 65.8401   6
   0  16  -2 499.470 26.6032   6
   0  16  -2 452.327 25.2224   7
   0  16   2 505.362 26.9440   6
   0  16   3 711.064 33.0612   6
   0  16  -3 694.468 31.6661   7
   0  16  -3 642.559 32.3111   6
   0  16   4 461.730 26.3126   6
   0  16  -4 447.961 25.1835   7
   0  16   5 380.478 24.1458   6
   0  16  -5 336.585 21.6683   7
   0  16   6 47.6099 14.0980   6
   0  16  -6 50.7555 11.7667   7
   0  16   7 219.681 19.1157   6
   0  16  -7 250.796 18.0132   7
   0  16   8 261.423 20.0582   6
   0  16   9 48.9832 12.2343   6
   0  16  10 68.0216 10.9215   6
   0  16  11 3.62680 6.49516   6
   0  17   0 5.82224 12.0227   7
   0  17   0 10.8555 12.7698   6
   0  17  -1 773.020 34.5241   7
   0  17   1 764.600 35.5169   6
   0  17  -1 772.389 35.3423   6
   0  17  -2 544.878 28.5491   7
   0  17   2 606.678 30.1988   6
   0  17  -2 573.978 29.8004   6
   0  17   3 3181.76 104.410   6
   0  17  -3 3189.22 104.353   6
   0  17  -3 3198.13 103.277   7
   0  17   4 1261.52 49.0430   6
   0  17  -4 1172.43 46.9310   7
   0  17   5 1491.83 55.8329   6
   0  17  -5 1427.55 53.7327   7
   0  17   6 743.342 34.8566   6
   0  17  -6 744.287 32.6902   7
   0  17  -7 315.422 19.5457   7
   0  17   7 333.775 22.1964   6
   0  17   8 125.035 14.7600   6
   0  17   9 101.866 12.9615   6
   0  17  10 72.4640 9.63621   6
   0  18   0 686.660 32.7078   7
   0  18   0 685.508 33.5540   6
   0  18  -1 1198.29 48.1032   7
   0  18  -1 1268.70 49.4681   6
   0  18   1 1267.29 49.5281   6
   0  18   2 862.788 38.3166   6
   0  18  -2 808.072 37.4264   6
   0  18  -2 856.569 36.9328   7
   0  18  -3 1018.51 42.5786   7
   0  18   3 1082.53 44.0959   6
   0  18   4 690.174 32.9728   6
   0  18  -4 659.973 31.4730   7
   0  18  -5 440.896 24.1025   7
   0  18   5 466.527 26.1497   6
   0  18  -6 27.4954 10.8109   7
   0  18   6 47.8323 12.9130   6
   0  18   7 15.9131 11.4806   6
   0  18   8 125.632 13.7738   6
   0  18   9-8.68544 8.33671   6
   0  18  10 18.2132 6.40164   6
   0  19   0 2.46126 11.4654   7
   0  19   0-5.74812 12.4149   6
   0  19  -1 263.739 20.3418   6
   0  19   1 267.671 20.3709   7
   0  19   1 263.226 20.8404   6
   0  19  -1 242.134 19.5029   7
   0  19   2 2184.12 75.5661   6
   0  19  -2 2095.32 74.1368   7
   0  19  -2 2256.57 75.8346   6
   0  19   3 498.494 27.2014   6
   0  19  -3 463.637 25.2345   7
   0  19   4 138.620 16.4829   6
   0  19  -4 144.167 14.7549   7
   0  19  -5 22.8563 10.0110   7
   0  19   5 14.4346 11.6404   6
   0  19  -6 47.8213 10.0168   7
   0  19   6 51.6275 11.7015   6
   0  19   7 41.2919 11.0709   6
   0  19   8 204.105 14.2870   6
   0  19   9 93.3170 9.27303   6
   0  20   0 473.243 25.8705   7
   0  20   0 503.091 26.7707   6
   0  20  -1 462.514 25.5970   7
   0  20   1 472.728 25.7932   7
   0  20  -1 480.984 26.4896   6
   0  20   1 478.910 26.5179   6
   0  20  -2 412.050 23.5197   7
   0  20   2 457.302 25.4624   6
   0  20   2 452.147 25.2263   7
   0  20   3 102.739 14.3912   6
   0  20  -3 120.815 13.5230   7
   0  20   4 174.604 16.3230   6
   0  20  -4 202.834 15.4698   7
   0  20   5 22.6709 10.4729   6
   0  20  -5 52.4515 11.0843   7
   0  20  -6 267.104 15.5597   7
   0  20   6 275.431 17.5847   6
   0  20   7-3.41957 8.17776   6
   0  20   8 13.9053 7.06499   6
   0  21   0-4.59509 10.5172   7
   0  21   0 16.3598 11.2236   6
   0  21  -1 142.685 14.4895   7
   0  21  -1 139.553 14.7248   6
   0  21   1 150.301 15.4181   6
   0  21   1 145.000 14.7518   7
   0  21   2 136.522 14.6872   6
   0  21   2 118.816 13.8247   7
   0  21  -2 116.054 13.8004   7
   0  21   3 2.88084 10.4889   7
   0  21  -3 3.07217 9.02435   7
   0  21   3 9.50103 10.6920   6
   0  21   4 67.9035 11.6565   7
   0  21  -4 77.8126 11.1569   7
   0  21   4 81.9553 12.1112   6
   0  21   5 19.7355 9.62284   6
   0  21  -5 31.0092 8.02381   7
   0  21   6 57.7904 9.94647   6
   0  21   7 9.14336 6.78359   6
   0  22   0 509.511 24.7874   6
   0  22   0 503.995 24.1459   7
   0  22   1 77.2559 11.7948   7
   0  22   1 87.6630 12.1213   6
   0  22  -1 102.366 11.4787   7
   0  22   2 72.9602 11.5884   6
   0  22   2 66.1804 11.4138   7
   0  22  -2 59.8986 10.3761   7
   0  22  -3 111.413 10.8771   7
   0  22   3 97.4667 12.1433   6
   0  22   3 100.359 12.0939   7
   0  22   4-2.04225 8.84533   7
   0  22   4 7.73235 8.52202   6
   0  22  -4 9.28648 7.08296   7
   0  22   5 147.770 11.5404   6
   0  22   5 117.015 11.2848   7
   0  22   6 142.212 10.2981   6
   0  22   6 144.641 10.9485   7
   0  23   0 3.83413 7.43568   7
   0  23   1 14.1764 8.51422   7
   0  23  -1 5.77316 7.27876   7
   0  23   1 29.9589 8.97784   6
   0  23  -2 31.7256 7.86620   7
   0  23   2 48.0421 9.03228   7
   0  23   2 34.3721 8.46070   6
   0  23   3 294.074 15.8187   7
   0  23  -3 277.780 14.3149   7
   0  23   3 290.458 15.5596   6
   0  23   4 209.645 12.4406   6
   0  23   4 221.959 13.0711   7
   0  23   5 12.4614 6.10398   7
   0  24   0 80.9282 8.46848   7
   0  24   1 794.518 28.3048   7
   0  24   2 241.375 12.6725   7
  -1   0  15 80.5598 7.23694  12
  -1   0  15 105.593 10.4483  11
  -1   0  14 10.7770 11.1924  11
  -1   0  13 7.51695 13.2611  11
  -1   0  12 41.6593 13.8078  11
  -1   0  11 183.688 16.9961  11
  -1   0  10 226.315 16.7766  11
  -1   0  10 214.497 14.8844  10
   1   0  -9 2921.23 216.963   1
   1   0  -8 19.4738 48.5221   1
   1   0  -8 31.8332 50.8180   5
   1   0  -7 1.11770 44.7302   5
  -1   0   7 11.0488 34.7902   3
   1   0  -7 40.3651 43.9940   1
  -1   0   6 811.935 79.3363   3
  -1   0   6 636.130 69.6035  16
   1   0  -6 758.048 83.1550   5
   1   0  -6 836.447 84.7239   1
   1   0  -5 230.873 45.9575   1
  -1   0   5 175.860 36.0008  16
   1   0  -5 167.380 42.1635   5
  -1   0   5 220.912 46.0558   3
  -1   0   4 23.9929 20.8382  16
  -1   0   4 64.4107 30.4508   3
  -1   0   4 31.6337 7.22920  13
   1   0  -4 52.2911 31.7296   5
  -1   0   3 28296.2 858.313   3
   1   0  -3 28375.4 836.274   5
  -1   0   2 5766.46 196.660   4
   1   0  -2 5745.43 186.569   5
  -1   0   1 339.194 26.0014   2
  -1   0   1 318.137 21.9935  15
  -1   0   0 1771.60 69.3088  15
   1   0   0 1842.28 60.8886  17
  -1   0   0 1708.17 71.0690   3
   1   0   0 1788.73 67.8168  16
  -1   0  -1 111.856 21.8000   1
   1   0   1 105.395 17.4607  17
   1   0   2 635.193 49.6991  17
  -1   0  -2 634.410 50.4215   1
  -1   0  -3 1.80617 26.2446   1
   1   0   4 675.978 63.6758  16
   1   0   4 631.436 59.2595  13
  -1   0  -4 704.893 69.1169   1
   1   0   5 387.009 49.9943  13
   1   0   5 323.740 52.5937  16
  -1   0  -5 345.449 59.9680   1
   1   0   6 3253.47 164.519  13
   1   0   6 3500.20 191.494  16
  -1   0  -6 3412.97 198.153   1
   1   0   7 602.061 83.9289  16
  -1   0  -7 544.893 85.2556   1
   1   0   8 30.4912 45.5408  16
  -1   0  -8 55.3974 58.6573   1
   1   0   9 266.756 17.3521  11
   1   0  10 6.06447 11.2378  11
   1   0  11 465.246 25.4132  11
   1   0  12 23.3717 12.0872  11
   1   0  13 76.1738 11.7511  11
   1   0  14 12.3374 7.24736  11
  -1  -1  15 13.9379 7.92317  11
  -1  -1  15 15.4818 5.52813  12
  -1   1  15 8.64276 7.95663  11
  -1  -1  14 67.9195 12.3549  11
  -1   1  14 83.1600 12.6177  11
  -1   1  13 109.059 16.0735  11
  -1  -1  13 127.536 16.3196  11
  -1  -1  12 511.552 27.0111  11
  -1   1  12 515.960 27.4442  11
  -1  -1  11 74.1335 13.2688  11
  -1   1  11 68.0336 13.4525  11
  -1   1  10 362.121 20.9706  11
  -1  -1  10 344.961 20.7890  11
  -1  -1  10 374.468 19.4482  10
   1   1  -9 705.910 110.070   5
   1   1  -9 765.911 111.993   1
   1  -1  -9 800.185 116.173   1
   1   1  -8 871.037 109.543   5
   1   1  -8 891.719 108.524   1
   1  -1  -8 940.275 113.221   1
   1   1  -7 553.176 82.7096   1
   1   1  -7 465.932 78.3552   5
   1  -1  -7 630.911 86.2950   1
  -1  -1   7 539.069 71.9438   3
   1  -1  -7 550.507 82.5446   5
  -1  -1   7 546.524 67.7819  16
   1  -1  -6 1005.64 91.3901   5
  -1   1   6 922.367 82.4134   3
   1   1  -6 820.359 89.8816   5
   1   1  -6 985.658 91.9081   1
  -1  -1   6 988.362 82.2484  16
  -1  -1   6 946.314 88.3587   3
   1  -1  -6 1000.46 96.3169   1
   1  -1  -5 789.777 73.9031   5
   1  -1  -5 712.487 75.2893   1
  -1  -1   5 860.678 78.0642   3
  -1   1   5 839.422 74.6839   3
  -1   1   5 840.499 43.9937  13
   1   1  -5 995.311 83.8376   1
   1   1  -5 842.890 76.3309   5
  -1  -1   5 879.807 68.7935  16
   1   1  -4 1823.96 102.412   5
   1   1  -4 1923.90 108.007   1
  -1  -1   4 1912.65 110.085   3
  -1   1   4 1934.21 71.2179  13
   1  -1  -4 1737.78 97.6899   5
  -1  -1   4 1821.45 60.6678  13
   1  -1  -4 1919.13 108.217   1
  -1   1   4 1992.01 109.338   3
  -1  -1   4 1816.83 92.2888  16
  -1   1   3 30382.2 857.677   3
  -1  -1   3 27842.3 825.836  16
   1   1  -3 28440.1 838.123   5
  -1  -1   3 29675.5 856.892   3
   1  -1  -3 28391.9 829.948   5
  -1   1   3 27368.1 808.593  13
  -1   1   2 487.468 31.2622   2
   1  -1  -2 514.735 39.7860   1
  -1  -1   2 475.720 36.0203   4
   1  -1  -2 551.658 31.2871   5
   1   1  -1 13241.7 382.440  13
  -1   1   1 13024.7 397.499   2
  -1  -1   1 13014.8 395.120   4
  -1  -1   1 13137.6 394.385  14
  -1   1   0 12724.1 381.012   3
   1  -1   0 12730.2 373.887  17
  -1  -1   0 12580.9 377.141   3
   1   1   0 12409.7 368.138  16
   1   1   1 89757.8 2542.03  16
  -1  -1  -1 87324.2 2523.78   3
   1  -1   1 92104.9 2544.41  17
  -1   1  -1 93395.9 2534.62   1
  -1  -1  -1 86524.4 2555.80   1
  -1   1  -2 3862.15 145.999   1
   1  -1   2 3896.09 153.491  17
  -1  -1  -2 3750.23 155.463   1
   1   1   3 6619.13 239.697  13
   1   1   3 6578.01 243.407  16
   1  -1   3 6634.90 251.886  17
  -1  -1  -3 6729.71 255.811   1
  -1   1  -3 6780.31 244.345   1
   1  -1   4 7603.99 282.925  16
   1   1   4 7389.33 284.767  16
   1   1   4 7424.88 272.278  13
  -1  -1  -4 7292.78 294.769   1
  -1   1  -4 7677.95 286.837   1
   1  -1   5 3545.61 179.451  16
   1  -1   5 3726.63 168.943  13
  -1  -1  -5 3378.20 189.760   1
  -1   1  -5 3742.40 187.607   1
   1   1   5 3554.03 165.030  13
   1   1   5 3618.58 183.548  16
   1   1   6 1227.65 108.642  16
  -1   1  -6 1080.71 105.733   1
   1  -1   6 1163.28 89.0341  13
  -1  -1  -6 1194.93 116.068   1
   1  -1   6 1213.35 104.781  16
   1   1   6 1132.78 87.8218  13
   1  -1   7 517.585 77.6703  16
  -1  -1  -7 591.132 90.5448   1
   1   1   7 623.503 86.4829  16
  -1   1  -7 537.028 83.9653   1
   1   1   8 395.637 77.4162  16
   1  -1   8 400.583 75.6949  16
  -1  -1  -8 320.041 81.5466   1
  -1   1  -8 289.500 72.8587   1
   1  -1   9 1033.55 39.9701  11
   1   1   9 1108.36 40.6334  11
   1  -1  10 737.868 31.9706  11
   1   1  10 727.980 31.9843  11
   1   1  11 49.0748 14.1530  11
   1  -1  11 48.3408 13.4979  11
   1  -1  12 116.256 14.6081  11
   1   1  12 110.849 14.2460  11
   1  -1  13 143.813 13.3576  11
   1   1  13 150.737 13.2419  11
   1   1  14 5.74330 7.00714  11
   1  -1  14 1.93080 7.01390  11
  -1  -2  15 65.4042 8.91826  11
  -1  -2  15 56.6717 6.83437  12
  -1  -2  14 130.669 13.4884  11
  -1   2  14 132.854 14.0994  11
  -1   2  14 107.660 9.38578  12
  -1   2  13 143.737 17.0756  11
  -1  -2  13 140.169 16.1441  11
  -1   2  12 1174.54 46.5085  11
  -1  -2  12 1211.69 46.1675  11
  -1   2  11 392.876 23.5842  11
  -1  -2  11 391.200 21.2029  10
  -1  -2  11 426.551 23.4948  11
  -1   2  10 1598.57 57.8328  11
  -1  -2  10 1696.43 56.4880  10
  -1  -2  10 1663.04 57.5278  11
   1   2  -9 1543.40 161.183   5
   1   2  -9 1713.74 160.194   1
   1  -2  -9 1434.78 155.549   1
  -1  -2   8 676.019 82.6113  16
   1   2  -8 751.662 105.778   5
   1   2  -8 815.084 102.890   1
   1  -2  -8 930.746 114.141   1
   1  -2  -7 1278.68 120.406   1
   1   2  -7 976.296 108.493   5
  -1  -2   7 1136.35 97.8393  16
  -1  -2   7 1221.06 108.727   3
   1   2  -7 1265.76 115.140   1
  -1  -2   6 745.797 71.4377  16
  -1  -2   6 846.068 83.8661   3
   1  -2  -6 913.533 93.3092   1
   1   2  -6 1002.13 92.9664   1
  -1   2   6 974.401 83.3013   3
   1   2  -6 960.298 93.4764   5
   1  -2  -6 705.618 76.1842   5
  -1   2   5 1502.04 99.3291   3
   1   2  -5 1389.92 100.895   5
  -1  -2   5 1520.06 89.2799  16
  -1   2   5 1357.61 68.2880  13
  -1  -2   5 1668.51 109.690   3
   1  -2  -5 1378.93 94.9616   5
   1   2  -5 1547.38 106.488   1
   1  -2  -5 1564.24 108.475   1
  -1   2   4 894.417 72.6053   3
   1   2  -4 788.242 68.7036   5
  -1   2   4 882.787 48.5586  13
  -1  -2   4 1015.30 61.5503  16
   1  -2  -4 904.080 65.3447   5
  -1  -2   4 876.163 75.1009   3
   1  -2  -4 919.873 73.9815   1
  -1   2   3 10723.8 352.893   3
  -1  -2   3 10490.3 342.452  17
   1   2  -3 9829.80 304.953   2
  -1  -2   3 10453.4 354.895   3
  -1  -2   3 10976.6 324.125  16
  -1   2   3 11210.6 322.165  13
   1  -2  -3 10383.6 328.188   5
   1  -2  -3 10366.4 346.544   1
  -1  -2   2 92499.6 2663.70  17
   1  -2  -2 95257.9 2647.39   5
  -1  -2   2 92909.5 2645.34  16
   1   2  -2 91118.9 2647.55  13
   1   2  -2 94604.4 2645.39   2
  -1  -2   2 95652.4 2656.43   4
   1  -2  -2 94370.5 2669.88   1
  -1   2   2 94673.5 2667.43   2
   1  -2  -1 15613.0 435.366   1
  -1  -2   1 14874.6 429.806  17
   1   2  -1 14547.1 432.621  13
  -1  -2   1 14340.6 437.674  14
  -1   2   1 14959.8 453.510   2
  -1  -2   1 14379.4 433.883   4
   1   2   0 11998.5 353.577  16
   1  -2   0 12069.1 367.579  17
  -1   2  -1 21737.2 660.631  14
  -1   2  -1 22720.5 633.550   1
  -1   2  -1 21251.6 664.327   5
   1  -2   1 21215.1 655.526  17
   1   2   1 21953.0 649.316  16
   1   2   2 5733.80 206.183  16
  -1  -2  -2 5416.89 217.979   1
  -1   2  -2 5717.47 195.953   1
   1  -2   2 6035.70 212.092  17
  -1   2  -2 5648.96 224.218   5
  -1   2  -2 5936.62 236.143   2
   1   2   3 1181.85 73.9023  13
  -1   2  -3 922.748 86.8265   5
   1  -2   3 1236.58 83.9237  17
  -1   2  -3 1230.33 75.2632   1
  -1  -2  -3 1112.45 85.7846   1
   1   2   3 1281.58 80.9434  16
  -1   2  -3 1164.27 96.0840   2
   1  -2   3 1276.99 79.4630  16
  -1   2  -4 8813.54 363.462   5
   1  -2   4 9992.37 353.220  17
   1   2   4 9275.39 325.047  13
  -1   2  -4 9639.88 334.704   1
   1  -2   4 8918.07 331.853  16
  -1  -2  -4 9045.26 352.846   1
   1   2   4 9109.04 338.907  16
   1   2   5 2737.90 139.482  13
   1   2   5 2792.60 157.921  16
  -1   2  -5 2578.13 149.438   1
  -1  -2  -5 2678.69 167.035   1
   1  -2   5 2838.06 153.264  16
  -1   2  -5 2825.51 178.944   5
  -1  -2  -6 1256.71 120.727   1
   1   2   6 1256.05 111.238  16
   1  -2   6 1199.09 92.7834  13
   1  -2   6 1137.42 103.755  16
   1   2   6 1123.60 88.2184  13
  -1   2  -6 1257.43 109.250   1
   1   2   7 293.464 49.0807  13
  -1  -2  -7 241.976 65.6749   1
  -1   2  -7 190.826 55.9378   1
   1   2   7 370.718 69.5521  16
   1  -2   7 203.204 55.3661  16
   1   2   8 1493.26 145.143  16
  -1  -2  -8 1514.55 157.491   1
   1  -2   8 1488.43 141.618  16
   1   2   9 116.329 13.5298  11
   1  -2   9 129.341 13.3469  11
   1  -2  10 622.903 28.4767  11
   1   2  10 612.573 28.9437  11
   1   2  11 240.468 18.6496  11
   1  -2  11 264.251 19.1582  11
   1   2  12 61.9518 12.6138  11
   1  -2  12 60.4357 13.0466  11
   1   2  13 64.4638 10.6102  11
   1  -2  13 60.1209 10.9529  11
   1   2  14 28.7923 7.15656  11
   1  -2  14 40.6842 8.03599  11
  -1  -3  15 13.4926 5.58905  12
  -1  -3  15 31.3528 7.72646  11
  -1   3  15 22.5287 7.92092  11
  -1   3  14 7.67926 10.5940  11
  -1  -3  14-4.78494 10.0167  11
  -1  -3  13 141.591 15.5076  11
  -1   3  13 142.881 16.6332  11
  -1  -3  12 779.235 34.0593  11
  -1   3  12 787.256 35.3170  11
  -1  -3  11 1552.78 55.6610  11
  -1   3  11 1516.73 56.7041  11
  -1  -3  11 1602.71 54.7649  10
  -1  -3  10 91.8354 12.9762  11
  -1  -3  10 60.3484 10.3216  10
  -1   3  10 78.6868 13.4886  11
   1   3  -9 565.811 98.6301   1
   1  -3  -9 447.940 89.5687   1
   1   3  -9 623.235 108.249   5
   1   3  -8 2208.82 181.292   5
  -1  -3   8 2279.68 153.979  16
   1   3  -8 2204.78 170.332   1
   1  -3  -8 2119.42 175.673   1
   1   3  -7 206.095 57.0696   1
   1  -3  -7 161.419 59.7732   1
  -1  -3   7 175.770 52.5774   3
   1   3  -7 98.5358 51.5335   5
  -1  -3   7 169.752 43.9624  16
   1   3  -6 2256.45 143.299   1
  -1   3   6 2212.05 129.126   3
   1  -3  -6 1965.60 140.588   1
  -1  -3   6 2065.52 137.556   3
   1   3  -6 1976.32 140.940   5
  -1  -3   6 1868.10 115.804  16
  -1  -3   5 2577.52 145.662   3
   1   3  -5 2535.49 143.260   5
  -1   3   5 2480.92 133.805   3
   1  -3  -5 2568.23 147.452   1
  -1   3   5 2313.56 106.608  13
  -1  -3   5 2622.68 122.898  16
   1   3  -5 2223.36 136.703   1
   1  -3  -4 2406.60 113.568   5
   1  -3  -4 2487.09 133.415   1
   1   3  -4 2536.68 98.2624   2
  -1  -3   4 2515.51 108.471  16
   1   3  -4 2551.38 130.690   5
  -1   3   4 2435.33 105.037  13
  -1   3   4 2467.22 127.861   3
  -1  -3   4 2459.86 134.499   3
  -1  -3   4 2142.01 121.336  17
  -1   3   3 8001.54 260.651  13
  -1  -3   3 7474.80 248.178  16
  -1  -3   3 7697.53 270.965  17
   1   3  -3 8072.49 249.376   2
   1  -3  -3 7780.35 277.551   1
  -1   3   3 8292.48 284.042   3
  -1  -3   2 27144.3 786.254  17
  -1  -3   2 25570.7 767.358   4
  -1   3   2 27114.7 798.912   2
  -1  -3   2 26640.2 764.043  16
   1  -3  -2 27844.6 793.837   1
   1   3  -2 27553.8 778.345  13
  -1  -3   1 23484.6 664.896  17
  -1  -3   1 23060.7 661.574  14
   1   3  -1 23207.7 666.993  13
   1  -3  -1 22380.0 650.995  15
   1  -3  -1 22365.8 664.573   1
  -1   3   1 22971.6 690.462   2
  -1   3   0 12587.3 378.838   5
  -1   3   0 12692.9 400.797   4
  -1   3   0 12255.6 387.535  14
   1  -3   1 12057.1 396.005  17
   1   3   1 12318.7 385.533  16
  -1   3  -1 12651.5 400.425   5
  -1   3  -1 12203.0 392.994  14
  -1   3  -1 12664.6 362.838   1
  -1   3  -2 14002.3 418.726   1
  -1   3  -2 13520.7 439.239  14
   1   3   2 13565.4 438.314  16
   1  -3   2 13832.0 444.599  17
  -1   3  -2 14534.6 476.709   2
  -1   3  -2 13267.0 455.879   5
   1   3   3 13577.0 444.592  16
  -1   3  -3 13697.8 426.280   1
   1   3   3 13455.9 434.863  13
  -1  -3  -3 13229.0 462.232   1
   1  -3   3 13439.0 440.918  16
   1  -3   3 13110.3 448.031  17
  -1   3  -3 12672.5 470.878   2
  -1   3  -3 13153.0 465.734   5
  -1  -3  -4 7148.73 304.805   1
   1   3   4 7885.97 278.945  13
  -1   3  -4 7538.95 320.765   2
  -1   3  -4 7556.57 318.656   5
   1  -3   4 7546.75 300.740  17
  -1   3  -4 7319.07 277.340   1
   1  -3   4 7325.41 283.846  16
   1   3   4 7641.99 293.572  16
   1  -3   5 1876.29 120.195  16
  -1   3  -5 1716.97 140.049   5
   1   3   5 1823.34 126.434  16
   1  -3   5 1864.21 131.969  17
   1   3   5 1925.17 111.594  13
  -1   3  -5 1753.25 117.498   1
  -1  -3  -5 1774.38 135.778   1
   1   3   6 4661.86 209.144  13
  -1  -3  -6 4110.18 242.611   1
   1  -3   6 4849.12 232.939  16
   1   3   6 4987.47 246.379  16
  -1   3  -6 4742.34 231.288   1
   1   3   7 1340.00 129.602  16
   1  -3   7 1354.00 122.894  16
  -1  -3  -7 1462.21 145.195   1
   1   3   7 1548.71 109.591  13
   1  -3   8 990.947 114.207  16
  -1  -3  -8 980.487 131.047   1
   1  -3   9 573.428 26.9134  11
   1  -3   9 578.668 24.8881  10
   1   3   9 602.082 27.2417  11
   1  -3  10 873.353 35.6885  11
   1   3  10 849.140 35.5435  11
   1  -3  11 658.423 30.2105  11
   1   3  11 649.930 30.1212  11
   1   3  12-2.12530 10.5612  11
   1  -3  12 13.6957 11.4610  11
   1   3  13 43.3843 10.0107  11
   1  -3  13 45.7660 10.8091  11
   1   3  14 21.1950 6.56450  11
   1  -3  14 43.9074 7.89440  11
  -1   4  15 9.14144 7.12062  11
  -1  -4  15 12.6975 6.96829  11
  -1  -4  15 0.76316 5.11893  12
  -1   4  14 116.337 13.2171  11
  -1  -4  14 111.675 12.5352  11
  -1  -4  13 274.716 19.1248  11
  -1   4  13 337.438 21.1523  11
  -1   4  12 66.0851 15.1628  11
  -1  -4  12 50.8717 12.8985  11
  -1   4  11 23.6333 13.9585  11
  -1  -4  11 25.1870 12.2129  11
  -1  -4  11 26.5178 10.4602  10
  -1  -4  10 460.634 22.3326  10
  -1  -4  10 455.778 23.7305  11
  -1   4  10 452.051 24.4010  11
   1   4  -9 171.023 66.7613   1
  -1   4   9 260.796 75.2616   4
   1  -4  -9 92.4051 62.9526   1
   1   4  -9 101.819 64.3604   5
   1  -4  -8 162.636 63.2335   1
   1   4  -8 223.084 77.4002   5
   1   4  -8 293.112 68.8807   1
  -1  -4   7 4987.82 251.326   3
  -1  -4   7 4547.19 221.135  16
   1   4  -7 4921.87 251.182   1
   1  -4  -7 5083.94 266.548   1
   1   4  -7 4471.10 255.946   5
   1   4  -6 2334.63 157.878   5
  -1  -4   6 2535.66 133.626  16
   1   4  -6 2255.31 150.129   1
  -1  -4   6 2521.82 157.289   3
   1  -4  -6 2493.81 162.296   1
  -1  -4   5 1605.01 90.7056  16
   1   4  -5 1535.69 112.394   5
   1  -4  -5 1609.96 117.182   1
  -1  -4   5 1563.30 113.349   3
  -1  -4   5 1448.82 106.148  17
  -1   4   5 1510.21 87.3929  13
   1  -4  -4 19892.3 666.302   1
  -1  -4   4 21181.8 630.116  16
   1   4  -4 21284.4 630.764   2
  -1  -4   4 20310.2 659.258  17
   1   4  -4 21423.4 666.117   5
  -1   4   4 20225.4 639.067  13
   1   4  -3 1124.04 63.6587   2
   1  -4  -3 1124.75 78.6009   1
  -1  -4   3 1139.78 56.0127  16
  -1  -4   3 1130.75 53.8205   4
  -1   4   3 1068.00 68.8583  13
  -1   4   3 1184.01 82.5353   4
  -1  -4   3 1131.44 72.2514  17
  -1  -4   2 9720.12 290.996  16
   1  -4  -2 9305.21 318.065   1
   1   4  -2 9951.22 311.649   2
  -1  -4   2 9532.14 313.353  17
   1   4  -2 9562.40 309.284  13
  -1   4   2 9836.28 333.911   4
  -1   4   2 10173.9 333.244   2
  -1   4   1 159016. 4450.96   4
  -1  -4   1 156380. 4410.84  14
   1  -4  -1 154358. 4423.88   1
   1  -4  -1 157689. 4409.88  15
  -1  -4   1 153653. 4426.08  17
   1   4  -1 156055. 4428.09  13
  -1   4   0 146788. 4236.65   5
  -1   4   0 155904. 4265.78   4
  -1   4  -1 3224.45 130.480  14
  -1   4  -1 3242.53 137.558   5
   1   4   2 301.058 38.7082  13
  -1   4  -2 313.156 28.6678   1
   1  -4   2 263.109 38.3927  16
  -1  -4  -2 301.823 49.8769   1
   1  -4   2 236.525 38.3816  17
  -1   4  -2 309.088 51.0786   5
   1   4   2 282.206 38.5350  16
  -1   4  -2 298.869 38.2572  14
  -1   4  -2 248.426 50.8687   2
  -1  -4  -3 8424.13 329.199   1
  -1   4  -3 8308.12 282.048   1
   1   4   3 7953.52 301.620  16
   1  -4   3 8404.64 301.881  16
  -1   4  -3 8566.40 327.972   5
   1   4   3 8473.64 295.384  13
  -1   4  -3 7949.29 296.045  14
  -1   4  -3 8566.78 337.666   2
   1  -4   3 8504.16 311.342  17
  -1  -4  -4 5042.16 247.558   1
  -1   4  -4 5301.14 253.424   5
  -1   4  -4 5080.76 211.175   1
   1  -4   4 5703.23 243.020  17
   1   4   4 5518.06 217.351  13
  -1   4  -4 5947.53 267.545   2
   1   4   4 5185.10 229.536  16
   1  -4   4 5043.06 220.391  16
   1  -4   5 1494.92 106.814  16
   1   4   5 1397.02 110.944  16
  -1  -4  -5 1378.35 123.302   1
  -1   4  -5 1276.89 125.942   5
  -1   4  -5 1395.40 100.814   1
   1  -4   5 1467.84 118.513  17
   1   4   5 1272.75 93.2102  13
  -1   4  -6 7264.94 363.603   5
   1  -4   6 7822.06 325.813  16
   1   4   6 7716.73 338.225  16
  -1  -4  -6 7405.40 356.261   1
   1   4   6 7685.99 303.388  13
  -1  -4  -7 375.507 85.8914   1
   1  -4   7 418.056 71.1949  16
   1   4   7 445.339 60.7639  13
   1  -4   8 1864.38 157.243  16
  -1  -4  -8 1745.38 176.511   1
   1   4   9 265.274 17.8813  11
   1  -4   9 267.106 17.8624  11
   1  -4   9 256.202 15.4318  10
   1  -4  10 354.555 21.7676  11
   1   4  10 377.164 21.8393  11
   1   4  11 325.688 20.8744  11
   1  -4  11 331.477 20.8954  11
   1  -4  12 142.884 14.9502  11
   1   4  12 145.730 14.4754  11
   1   4  13 50.6532 9.28004  11
   1  -4  13 39.5693 10.3880  11
   1  -4  14 129.228 9.93472  11
  -1   5  15 67.0105 8.14529  11
  -1  -5  15 69.0014 7.76036  11
  -1   5  14 80.6098 11.7536  11
  -1  -5  14 67.7898 10.3521  11
  -1   5  13 23.9053 13.0255  11
  -1  -5  13 17.1313 10.8771  11
  -1  -5  12 124.613 15.1785  11
  -1   5  12 151.584 17.6869  11
  -1  -5  12 147.232 13.7727  10
  -1   5  11 2570.99 84.8049  11
  -1  -5  11 2534.15 81.6311  10
  -1  -5  11 2496.12 82.4677  11
  -1   5  10 796.844 35.8295  11
  -1  -5  10 858.863 34.6427  11
  -1  -5  10 848.036 33.4602  10
  -1   5   9 1700.60 174.317   4
   1   5  -9 1542.12 152.340   1
   1   5  -9 1602.88 174.638   5
   1  -5  -9 1548.87 165.510   1
   1  -5  -8 150.691 64.7544   1
  -1   5   8 13.8721 47.3120   4
   1   5  -8 94.6694 60.3663   5
   1   5  -8 71.9771 46.0742   1
  -1  -5   7 802.336 96.5947   3
   1  -5  -7 569.907 89.1607   1
   1   5  -7 671.662 98.4842   5
   1   5  -7 587.256 84.3158   1
  -1  -5   6 202.417 38.7884  16
  -1  -5   6 136.655 48.7349   3
   1   5  -6 207.535 60.0031   5
   1  -5  -6 161.041 55.5626   1
  -1  -5   6 171.523 48.0832  17
   1   5  -6 133.803 42.4139   1
  -1   5   5 1334.72 89.0147  13
   1  -5  -5 1325.33 111.639   1
  -1  -5   5 1431.42 106.833  17
   1   5  -5 1394.55 110.154   5
  -1  -5   5 1395.90 84.5088  16
  -1  -5   5 1499.10 113.598   3
   1   5  -4 11265.8 399.491   5
  -1  -5   4 11023.5 362.345  16
  -1  -5   4 11473.9 397.607  17
   1  -5  -4 11055.6 404.981   1
   1   5  -4 11353.2 376.628   2
  -1   5   4 12076.4 419.699   4
  -1   5   4 11081.2 381.726  13
  -1   5   3 4778.78 196.306   4
  -1  -5   3 4566.78 150.715  16
  -1   5   3 4812.84 181.129  13
  -1  -5   3 4715.38 187.277  15
   1   5  -3 5145.58 189.021   5
   1  -5  -3 4887.52 189.556   1
  -1  -5   3 4698.39 178.849  17
   1   5  -3 4819.85 173.171   2
  -1   5   2 3595.78 161.332   4
   1  -5  -2 3305.68 146.300   1
  -1   5   2 3585.62 163.930   2
   1   5  -2 3768.93 154.994   5
   1  -5  -2 3483.05 134.847  15
   1   5  -2 3874.38 149.711   2
  -1  -5   2 3643.98 124.909  16
  -1  -5   2 3443.57 144.617  17
   1   5  -1 8200.02 272.443  13
   1  -5  -1 8100.21 252.517  15
  -1   5   1 8030.28 288.279   4
  -1  -5   1 8145.62 244.121  14
  -1  -5   1 8079.10 269.309  17
  -1   5   1 7780.86 239.083   5
   1  -5  -1 8530.82 268.872   1
   1   5   0 11865.9 385.667  13
  -1  -5   0 11744.3 381.665  17
  -1   5   0 12148.7 373.823   5
   1  -5   0 12111.8 364.647  15
  -1   5   0 12511.6 401.312   4
  -1   5  -1 841.942 79.7734   2
  -1   5  -1 964.089 59.2237  14
  -1   5  -1 934.322 66.7762   5
  -1   5  -2 31091.2 984.552   2
  -1   5  -2 31258.1 909.559   1
  -1   5  -2 30297.3 957.192   5
  -1  -5  -2 30772.1 963.324  15
   1  -5   2 31221.3 945.963  16
  -1  -5  -2 31331.7 976.038   1
   1  -5   2 31983.9 955.852  17
   1   5   2 31963.8 939.632  13
  -1   5  -2 30928.7 930.804  14
  -1   5  -3 751.457 85.4530   2
  -1   5  -3 770.987 81.1016   5
   1  -5   3 679.702 67.9255  17
  -1   5  -3 623.741 57.6089  14
  -1   5  -3 768.999 54.0254   1
   1   5   3 738.688 63.1472  13
  -1  -5  -3 645.839 71.9764  15
  -1  -5  -3 561.838 74.2120   1
   1  -5   3 703.458 65.0917  16
  -1   5  -4 817.636 65.9417   1
   1  -5   4 859.647 77.1801  16
  -1  -5  -4 848.604 94.8661   1
   1  -5   4 808.309 82.0067  17
   1   5   4 809.012 70.5215  13
  -1   5  -4 804.183 93.3238   5
  -1   5  -4 697.298 67.5541  14
  -1   5  -4 926.858 100.072   2
   1   5   5 418.096 55.2595  13
   1  -5   5 385.066 59.0088  16
  -1  -5  -5 350.225 73.5553   1
  -1   5  -5 287.713 65.8906   2
  -1   5  -5 377.766 77.8831   5
   1  -5   5 361.609 62.0442  17
  -1   5  -5 351.800 52.9446  14
   1   5   6 3189.52 168.558  13
  -1   5  -6 3073.11 216.275   5
  -1  -5  -6 2970.07 208.582   1
   1  -5   6 2741.88 191.240  17
   1  -5   6 3275.57 182.483  16
   1   5   7 1211.74 103.350  13
  -1  -5  -7 1283.07 143.753   1
   1  -5   7 1177.01 114.890  16
  -1  -5  -8 818.895 127.992   1
   1  -5   8 850.504 106.079  16
   1  -5   9 7.22701 7.81529  10
   1   5   9 9.73514 10.5466  11
   1  -5   9 7.84851 10.7427  11
   1   5  10 83.2446 13.5784  11
   1  -5  10 88.6194 14.2834  11
   1  -5  11 55.3411 13.3565  11
   1   5  11 61.8964 12.3673  11
   1  -5  12 9.15204 11.2275  11
   1   5  12 2.98749 9.89943  11
   1   5  13-0.60589 8.07504  11
   1  -5  13 8.14928 9.12785  11
   1  -5  14 37.3625 7.12235  11
  -1  -6  14 30.2436 8.81466  11
  -1   6  14 35.2499 9.87205  11
  -1   6  13 25.5113 12.8555  11
  -1  -6  13 22.4813 10.6906  11
  -1  -6  12 218.659 17.3585  11
  -1  -6  12 196.112 15.1839  10
  -1   6  12 194.511 19.1657  11
  -1  -6  11 396.892 21.2835  10
  -1  -6  11 347.777 21.9148  11
  -1   6  11 386.017 24.6456  11
  -1  -6  10 5097.76 153.059  10
  -1   6  10 5199.46 156.178  11
  -1  -6  10 4995.56 153.422  11
   1  -6  -9 518.205 102.340   1
  -1   6   9 685.327 117.580   4
   1   6  -9 640.421 103.614   1
  -1  -6   9 652.459 27.4632  11
   1   6  -9 609.085 116.417   5
  -1  -6   9 661.580 27.1166  10
  -1   6   9 598.719 29.0815  11
  -1   6   8 240.090 74.0036   4
   1  -6  -8 157.963 69.1491   1
   1   6  -8 242.199 70.4148   1
   1   6  -8 171.258 71.9634   5
   1   6  -7 1364.84 123.532   1
   1   6  -7 1261.36 131.793   5
  -1  -6   7 1130.00 117.916   3
   1  -6  -7 1403.38 136.625   1
  -1   6   7 1181.56 130.803   4
   1  -6  -6 1094.40 112.294   1
   1   6  -6 1260.88 109.844   1
  -1  -6   6 1031.92 102.431  17
  -1  -6   6 1017.74 105.923   3
  -1   6   6 1119.31 114.546   4
   1   6  -6 1050.32 106.930   5
  -1  -6   5 341.472 41.3539  16
  -1   6   5 301.131 61.7316   4
  -1  -6   5 309.479 54.3665  17
   1   6  -5 331.806 61.0332   5
  -1   6   5 309.488 47.9996  13
   1  -6  -5 435.625 68.9810   1
  -1   6   4 3771.03 175.755  13
   1   6  -4 3928.77 174.328   2
   1  -6  -4 3839.86 191.124   1
  -1  -6   4 3817.41 182.299  17
  -1   6   4 4223.35 202.138   4
   1   6  -4 3937.49 187.815   5
  -1  -6   4 3801.25 152.260  16
  -1   6   3 22491.0 712.930   4
  -1  -6   3 22680.9 703.975  15
   1  -6  -3 21317.2 679.180  15
  -1  -6   3 21871.5 692.441  17
  -1  -6   3 22622.6 659.640  16
   1  -6  -3 20964.4 697.928   1
   1   6  -3 22258.3 690.561   2
   1   6  -3 22417.4 699.306   5
   1   6  -2 7796.27 280.483   5
   1  -6  -2 7675.07 261.164  15
   1   6  -2 8231.72 282.303   2
  -1  -6   2 7574.22 274.880  17
  -1   6   2 8496.93 305.837   2
  -1   6   2 7980.47 293.008   4
  -1  -6   2 7723.07 288.072  15
   1  -6  -2 7522.01 278.915   1
  -1  -6   2 7488.34 249.292  16
  -1   6   1 4577.07 152.185   5
  -1  -6   1 5029.92 201.302  15
  -1  -6   1 4452.68 148.645  14
  -1   6   1 5260.56 216.015   2
  -1   6   1 5084.73 202.196   4
   1  -6  -1 5045.09 200.830  17
   1  -6  -1 5046.90 168.922  15
  -1  -6   1 5118.59 187.382  17
   1   6  -1 5020.90 190.359  13
   1   6   0 88117.3 2519.00  13
  -1   6   0 88645.2 2555.41   2
   1  -6   0 89356.6 2532.98  17
  -1  -6   0 86412.6 2532.66  15
  -1   6   0 84982.2 2496.42   5
   1  -6   0 85535.7 2490.59  15
  -1  -6   0 89123.7 2515.09  17
  -1   6   0 88177.4 2529.65   4
   1   6   1 19430.5 595.086  13
   1  -6   1 19076.8 608.994  17
  -1  -6  -1 18156.7 609.769  15
  -1   6  -1 18264.2 590.336   5
  -1   6  -1 19832.0 601.767   4
  -1   6  -1 18435.2 630.686   2
  -1  -6  -2 28156.3 871.985  15
   1  -6   2 26180.8 849.502  16
   1  -6   2 27414.5 863.253  17
  -1   6  -2 27582.9 828.278  14
  -1   6  -2 28348.1 862.868   5
   1   6   2 28380.4 848.360  13
  -1  -6  -2 27938.9 887.523   1
  -1   6  -2 27302.0 895.276   2
   1  -6   3 404.159 52.0917  16
  -1   6  -3 408.624 39.9464   1
  -1   6  -3 329.377 63.7915   2
  -1  -6  -3 415.830 68.5248   1
   1   6   3 332.368 47.3750  13
  -1  -6  -3 464.588 63.1160  15
   1  -6   3 279.699 50.0435  17
  -1   6  -3 362.065 43.2734  14
  -1   6  -3 347.208 60.6155   5
   1  -6   4 1401.53 102.639  16
   1   6   4 1525.10 102.172  13
  -1  -6  -4 1343.51 115.929  15
  -1   6  -4 1469.45 125.791   5
  -1  -6  -4 1411.01 126.078   1
   1  -6   4 1406.30 111.545  17
  -1   6  -4 1453.04 129.832   2
  -1  -6  -5 866.804 107.513   1
   1  -6   5 803.812 81.4659  16
   1  -6   5 793.947 91.9592  17
  -1   6  -5 927.229 110.104   5
   1   6   5 743.503 75.7197  13
  -1   6  -5 907.180 108.803   2
  -1  -6  -5 929.592 102.888  15
   1  -6   6 613.604 77.7802  16
   1   6   6 670.559 74.5397  13
  -1  -6  -6 502.068 93.1854   1
   1  -6   6 756.128 98.5595  17
  -1   6  -6 888.094 116.795   5
   1   6   7 163.464 45.9596  13
  -1  -6  -7 205.971 76.0748   1
   1  -6   7 158.514 50.6923  16
  -1   6  -7 122.983 70.7358   5
   1  -6   8 9557.81 422.732  16
   1  -6   8 9344.89 271.902  11
  -1  -6  -8 8707.41 465.583   1
  -1  -6  -8 9600.34 467.672  15
   1   6   9 464.901 24.7506  11
   1  -6   9 525.696 24.9600  11
   1  -6   9 471.130 21.7753  10
   1   6  10 60.6463 12.8697  11
   1  -6  10 59.8023 12.7242  11
   1  -6  11 670.821 30.1753  11
   1   6  11 677.362 30.0728  11
   1  -6  12 108.929 13.6779  11
   1   6  12 98.5710 12.0559  11
   1  -6  13 45.3811 9.80087  11
   1   6  13 60.0283 8.75824  11
   1  -6  14 60.7969 7.35528  11
  -1   7  14 33.3660 9.57692  11
  -1  -7  14 26.6459 8.10489  11
  -1   7  13 31.0534 12.0872  11
  -1  -7  13 31.3717 10.4139  11
  -1  -7  12 429.258 21.1135  10
  -1   7  12 413.780 24.3838  11
  -1  -7  12 397.210 22.0089  11
  -1  -7  11 843.045 34.6463  11
  -1   7  11 860.525 37.5732  11
  -1  -7  11 829.140 33.8267  10
  -1  -7  10 59.7973 11.8512  10
  -1  -7  10 79.1919 13.5182  11
  -1   7  10 57.9861 15.6531  11
  -1  -7   9 1763.14 59.2001  11
  -1  -7   9 1764.82 58.8213  10
  -1   7   9 1744.65 61.6484  11
   1   7  -8 293.755 74.2077   1
  -1   7   8 234.031 71.2811   4
   1   7  -8 296.542 85.4401   5
   1  -7  -8 309.122 83.0542   1
  -1   7   7 31.7926 43.8364   4
   1   7  -7 66.6135 44.4292   1
   1  -7  -7 52.8018 51.2526   1
  -1  -7   7 44.6716 48.0691   3
   1   7  -7 12.2165 50.7731   5
   1   7  -6 41.8266 48.1121   5
  -1  -7   6 119.948 48.7222  17
  -1   7   6 39.5749 41.5886   4
  -1  -7   6 82.5021 43.7796   3
   1  -7  -6 91.4646 50.7968   1
   1  -7  -5 26.0181 30.4428  15
  -1   7   5 44.5570 40.3807   4
  -1   7   5 7.48692 30.2841  13
  -1  -7   5 37.5632 30.2593  17
   1  -7  -5 96.8122 43.2107   1
   1   7  -5 64.5549 45.0168   5
   1   7  -4 8235.84 311.780   2
  -1   7   4 8291.76 334.304   4
  -1  -7   4 8109.77 317.779  17
   1  -7  -4 7885.59 303.256  15
   1   7  -4 8289.62 322.954   5
   1  -7  -4 7618.32 323.648   1
  -1   7   4 7753.00 312.453  13
  -1  -7   4 8241.99 278.375  16
  -1  -7   3 7157.11 237.640  16
   1  -7  -3 6730.76 276.824   1
   1   7  -3 6911.48 271.400   2
   1   7  -3 7137.05 273.702   5
  -1  -7   3 6644.81 266.697  17
  -1   7   3 6372.94 279.099   4
  -1  -7   3 7186.75 279.093  15
   1  -7  -3 6906.49 255.918  15
  -1   7   2 6738.31 277.114   2
   1   7  -2 6617.22 256.913   2
   1   7  -2 6507.82 251.142   5
  -1  -7   2 6571.64 250.718  17
  -1  -7   2 6614.72 260.356  15
   1  -7  -2 6480.59 253.451   1
  -1   7   2 6442.43 263.055   4
   1  -7  -2 6437.86 232.225  15
  -1   7   1 3121.22 153.260   4
  -1   7   1 2948.08 109.209   5
  -1   7   1 3339.25 171.329   2
   1  -7  -1 2911.23 151.530  17
   1   7  -1 3134.42 144.777   5
  -1  -7   1 3169.16 154.402  15
   1   7  -1 3128.36 147.698  13
  -1  -7   1 2952.19 140.907  17
   1  -7  -1 3085.77 124.176  15
  -1   7   0 24022.5 747.671   5
  -1  -7   0 25060.1 770.784  17
  -1  -7   0 25193.3 789.307  15
   1   7   0 25838.9 777.427  13
   1  -7   0 24991.2 744.624  15
  -1   7   0 24402.7 809.649   2
   1   7   0 25181.4 734.796   4
  -1   7   0 25677.8 781.576   4
   1  -7   0 25427.9 788.569  17
   1   7   1 8864.07 320.244  13
   1  -7   1 8895.91 334.010  17
  -1   7  -1 8609.10 312.720   5
  -1   7  -1 9213.57 321.525   4
  -1   7  -1 8920.17 357.812   2
  -1  -7  -1 9010.11 337.397  15
  -1   7  -2 16678.7 554.828   5
  -1   7  -2 16071.1 509.898  14
   1  -7   2 16603.8 547.715  16
  -1   7  -2 16631.5 592.566   2
   1   7   2 16485.2 544.109  13
   1  -7   2 16792.5 561.188  17
  -1  -7  -2 17025.0 568.204  15
  -1  -7  -3 3191.45 180.196  15
  -1  -7  -3 3284.76 193.949   1
  -1   7  -3 3245.27 199.030   2
   1  -7   3 3361.68 165.822  16
   1   7   3 3133.53 161.243  13
   1  -7   3 3055.64 171.559  17
  -1   7  -3 3490.56 186.719   5
   1  -7   4 1074.04 100.945  17
  -1   7  -4 1305.75 126.122   2
  -1   7  -4 1134.68 114.948   5
   1  -7   4 1137.95 93.8295  16
  -1  -7  -4 1267.62 122.932   1
  -1  -7  -4 1098.10 106.795  15
   1   7   4 1158.22 93.9980  13
  -1  -7  -5 1277.69 132.990   1
  -1   7  -5 1126.11 123.163   5
   1  -7   5 1222.50 118.064  17
  -1  -7  -5 1263.46 121.924  15
  -1   7  -5 1219.93 130.122   2
   1  -7   5 1118.70 100.627  16
   1   7   5 1204.73 101.486  13
   1   7   6 304.698 56.6041  13
  -1   7  -6 445.320 87.6450   2
  -1  -7  -6 433.052 83.4584  15
  -1  -7  -6 367.234 88.3149   1
  -1   7  -6 353.156 83.4274   5
   1  -7   6 286.555 69.8643  17
   1  -7   6 494.976 72.3220  16
   1  -7   7 3874.88 219.027  16
   1   7   7 3399.54 199.314  13
  -1  -7  -7 3183.28 236.017  15
  -1   7  -7 3136.79 246.358   5
  -1  -7  -7 3659.79 262.947   1
   1  -7   7 3747.11 247.007  17
   1  -7   8 86.7549 13.1661  11
   1  -7   8 60.0847 9.68052  10
   1  -7   9 1736.17 59.3686  10
   1  -7   9 1943.06 62.5240  11
   1  -7  10 422.921 23.0209  11
   1  -7  10 393.322 19.4251  10
   1   7  10 402.093 22.4495  11
   1  -7  11 414.348 22.6658  11
   1   7  11 401.251 21.6169  11
   1   7  12 17.6793 9.28797  11
   1  -7  12 29.2752 11.1395  11
   1  -7  13 78.1961 10.0767  11
  -1  -8  14 69.2243 8.53854  11
  -1   8  13 57.3912 11.8635  11
  -1  -8  13 65.8519 10.6127  11
  -1  -8  12 129.974 14.1599  11
  -1  -8  12 133.069 12.4985  10
  -1   8  12 120.789 15.6493  11
  -1  -8  11 331.149 19.7919  11
  -1   8  11 302.764 21.8477  11
  -1  -8  11 319.229 18.6165  10
  -1  -8  10 4024.28 124.691  11
  -1  -8  10 4174.43 124.741  10
  -1   8  10 3982.09 127.846  11
  -1  -8   9 48.0807 10.3628  10
  -1   8   9 45.3810 13.9265  11
  -1  -8   9 54.5854 11.6656  11
   1   8  -8 173.881 64.2896   1
  -1   8   8 329.850 79.7793   4
   1  -8  -8 212.694 70.3069   1
   1   8  -8 343.868 89.7861   5
   1   8  -7 815.986 100.354   1
  -1   8   7 691.142 108.173   4
   1  -8  -7 664.227 105.240   1
  -1  -8   7 826.206 111.483   3
  -1  -8   7 814.034 103.921  17
   1  -8  -7 758.661 95.2484  15
   1   8  -7 809.215 113.606   5
   1  -8  -6 1094.61 119.124   1
  -1   8   6 1209.53 125.330   4
  -1  -8   6 1257.73 126.340   3
   1   8  -6 1074.76 117.380   5
   1  -8  -6 1317.38 114.521  15
  -1  -8   6 1217.99 117.702  17
   1   8  -5 13314.0 498.511   5
  -1   8   5 13420.0 512.517   4
   1  -8  -5 13010.7 506.773   1
   1  -8  -5 13118.4 477.628  15
  -1  -8   5 13145.3 491.716  17
   1  -8  -4 35369.8 1155.96   1
   1  -8  -4 37709.9 1128.30  15
   1   8  -4 36869.7 1144.45   2
  -1  -8   4 36174.0 1142.91  17
  -1   8   4 35494.0 1159.80   4
   1   8  -4 38982.2 1153.94   5
  -1   8   3 1513.74 121.344   2
   1   8  -3 1502.98 108.205   2
   1  -8  -3 1446.12 108.343   1
  -1   8   3 1489.85 113.489   4
   1   8  -3 1506.64 106.382   5
  -1  -8   3 1446.24 102.760  17
  -1  -8   3 1626.00 111.288  15
   1  -8  -3 1536.66 94.1663  15
  -1   8   2 1842.41 119.577   4
   1   8  -2 1835.83 110.740   5
   1   8  -2 1723.42 114.863   2
  -1   8   2 1790.24 130.662   2
   1  -8  -2 1721.24 94.4811  15
   1  -8  -2 1871.10 113.601   1
  -1  -8   2 1814.71 110.604  17
  -1  -8   2 1853.18 117.699  15
   1   8  -1 1591.17 105.817  13
   1  -8  -1 1524.99 108.888  17
  -1  -8   1 1503.93 105.131  15
  -1  -8   1 1538.70 99.2233  17
  -1   8   1 1567.84 107.092   4
   1   8  -1 1593.14 99.8166   5
   1  -8  -1 1502.31 82.4468  15
  -1   8   0 763.210 70.9306   4
  -1  -8   0 732.734 65.6143  17
  -1   8   0 699.475 83.2380   2
   1  -8   0 769.524 54.1569  15
   1  -8   0 818.405 76.7007  17
   1   8   0 657.800 67.9045  13
  -1   8   0 718.027 54.7774   5
  -1  -8   0 658.099 69.9102  15
  -1   8  -1 7946.36 343.835   2
  -1  -8  -1 8023.37 305.095  17
  -1  -8  -1 7649.49 316.293  15
   1   8   1 8515.32 312.736  13
   1  -8   1 8137.40 321.000  17
  -1   8  -1 8305.66 297.055   5
  -1   8  -2 14596.9 556.535   2
   1  -8   2 14669.4 509.025  16
   1   8   2 15491.3 513.135  13
   1  -8   2 14604.5 522.994  17
  -1  -8  -2 14504.2 526.900  15
  -1   8  -2 15488.5 516.369   5
  -1   8  -3 26463.2 895.845   2
   1  -8   3 25704.8 850.100  17
  -1  -8  -3 26232.9 861.052  15
   1   8   3 26466.8 834.389  13
   1  -8   3 25506.1 829.835  16
  -1   8  -3 25722.6 852.857   5
   1  -8   4 8659.36 363.725  17
   1   8   4 8469.74 339.989  13
   1  -8   4 8519.16 339.546  16
  -1   8  -4 8447.15 373.151   5
  -1  -8  -4 8734.67 390.956   1
  -1  -8  -4 8218.36 366.483  15
  -1   8  -4 8698.94 397.202   2
   1  -8   5 4357.34 222.447  16
  -1   8  -5 4553.49 272.304   2
  -1  -8  -5 4441.04 252.274  15
  -1   8  -5 3896.76 249.907   5
  -1  -8  -5 4151.75 263.872   1
   1  -8   5 4647.78 252.243  17
   1   8   5 4628.33 226.267  13
  -1   8  -6 176.558 74.2720   5
   1   8   6 182.751 51.9499  13
  -1  -8  -6 239.800 79.0687   1
  -1  -8  -6 169.742 65.0632  15
   1  -8   6 201.330 51.2701  16
   1  -8   6 147.283 62.9903  17
   1   8   7 935.997 105.596  13
  -1   8  -7 1025.70 139.920   5
   1  -8   7 892.214 104.785  16
  -1  -8  -7 873.965 129.715   1
  -1  -8  -7 982.168 127.782  15
   1  -8   7 934.938 123.037  17
   1  -8   8 3773.42 116.113  11
   1  -8   9 1155.00 41.5619  11
   1  -8   9 1010.05 37.9452  10
   1  -8  10 399.171 22.3474  11
   1  -8  10 364.153 18.3475  10
   1  -8  11 173.007 16.2396  11
   1  -8  12 60.5024 11.2173  11
   1  -8  13 45.2728 8.76190  11
  -1  -9  14 16.2317 6.55356  11
  -1  -9  13 16.1973 8.49818  11
  -1   9  13 46.1845 10.6744  11
  -1  -9  12 543.317 24.8335  11
  -1   9  12 572.794 27.3867  11
  -1  -9  12 511.086 23.5158  10
  -1  -9  11 46.9166 11.5768  11
  -1   9  11 45.9103 14.3318  11
  -1  -9  11 74.5326 11.3375  10
  -1   9  10 1540.03 56.9698  11
  -1  -9  10 1530.33 53.7043  11
  -1  -9  10 1547.52 53.4875  10
  -1   9   9 5167.05 159.423  11
  -1  -9   9 5146.64 155.985  11
  -1  -9   9 5297.01 156.237  10
  -1   9   8 387.520 89.1721   4
  -1   9   8 415.817 23.2633  11
   1  -9  -8 511.488 102.609   1
  -1  -9   8 406.866 20.1996  10
  -1   9   7 956.873 126.157   4
   1  -9  -7 896.605 124.347   1
  -1  -9   7 812.584 115.662   3
   1   9  -7 865.974 106.680   1
  -1  -9   7 835.740 110.055  17
   1   9  -7 943.950 125.199   5
   1  -9  -6 2134.71 177.182   1
   1   9  -6 2500.20 183.958   5
  -1  -9   6 2389.48 173.542  17
  -1   9   6 2316.18 181.771   4
   1   9  -5 3400.28 204.863   5
   1  -9  -5 3448.11 187.997  15
   1  -9  -5 3316.61 210.462   1
  -1   9   5 3560.93 214.047   4
  -1  -9   5 3583.68 204.916  17
  -1   9   4 3310.68 196.360   4
   1   9  -4 3412.25 190.822   2
   1  -9  -4 3440.13 199.068   1
  -1  -9   4 3381.57 186.509  17
   1   9  -4 3438.82 189.361   5
  -1   9   4 3423.45 204.746   2
   1  -9  -4 3216.79 169.224  15
  -1   9   3 469.872 70.4066   4
   1  -9  -3 548.772 70.7218   1
  -1  -9   3 385.858 58.2851  17
   1   9  -3 467.317 67.3189   2
   1   9  -3 544.022 66.7321   5
  -1   9   3 557.817 79.4491   2
   1  -9  -3 470.110 53.2072  15
  -1  -9   3 560.975 69.9711  15
   1   9  -2 6306.96 255.125   5
   1  -9  -2 5993.95 231.942  15
  -1   9   2 6174.84 266.364   4
  -1   9   2 6171.31 289.162   2
  -1  -9   2 6173.66 257.397  17
   1  -9  -2 5996.23 269.544  17
  -1  -9   2 6131.45 263.307  15
   1   9  -2 6125.02 269.898   2
  -1  -9   1 1188.00 93.4226  17
   1  -9  -1 1284.71 104.422  17
  -1   9   1 1292.04 116.020   2
   1   9  -1 1438.80 106.376  13
   1   9  -1 1338.98 94.2635   5
   1  -9  -1 1382.10 80.9303  15
  -1  -9   1 1347.06 103.194  15
  -1   9   1 1312.58 102.499   4
  -1  -9   0 47.4011 33.5034  15
  -1   9   0 87.7149 34.7711   4
   1   9   0 69.6641 36.0588  13
  -1  -9   0 141.244 35.5113  17
   1  -9   0 83.4815 38.9259  17
   1  -9   0 78.1919 22.5386  15
  -1   9   0 81.9515 42.6739   2
   1  -9   1 3177.03 176.239  17
  -1   9  -1 3096.44 156.080   5
  -1  -9  -1 3010.13 161.507  17
   1   9   1 3070.15 168.009  13
  -1   9  -1 3259.42 198.692   2
  -1  -9  -1 3163.53 174.251  15
  -1   9  -2 24417.7 816.009   5
  -1   9  -2 24716.3 874.139   2
  -1  -9  -2 25683.3 840.796  15
   1  -9   2 26760.1 844.032  17
   1   9   2 25755.5 826.298  13
   1  -9   2 25434.5 818.719  16
   1  -9   3 7953.88 340.521  17
  -1  -9  -3 8068.13 347.263  15
  -1   9  -3 7749.01 336.339   5
   1  -9   3 7649.88 317.786  16
   1   9   3 8092.27 328.894  13
  -1   9  -3 8220.33 380.504   2
  -1  -9  -4 4231.78 239.862  15
   1  -9   4 4075.95 212.214  16
  -1   9  -4 4350.49 243.756   5
   1  -9   4 4073.94 231.540  17
   1   9   4 4666.00 228.559  13
  -1   9  -4 4267.27 262.626   2
   1   9   5 4436.95 233.064  13
   1  -9   5 4210.01 221.937  16
  -1  -9  -5 4678.61 281.056   1
  -1   9  -5 4576.46 280.011   2
  -1   9  -5 3837.73 250.809   5
   1  -9   5 4408.59 252.974  17
  -1  -9  -5 4038.28 248.432  15
   1   9   6 518.091 80.5239  13
  -1  -9  -6 687.982 110.637   1
   1  -9   6 518.966 77.3678  16
  -1  -9  -6 661.651 106.553  15
   1  -9   6 635.930 99.2862  17
  -1   9  -6 571.390 103.353   5
  -1  -9  -7 2719.13 220.842  15
   1   9   7 2641.30 186.685  13
   1  -9   7 2982.33 195.932  16
  -1   9  -7 2802.25 91.3909   7
  -1  -9  -7 2864.49 240.189   1
  -1   9  -7 2422.18 219.765   5
   1  -9   8 579.385 27.0349  11
   1  -9   9 759.109 32.2680  11
   1  -9  10 1089.02 41.4953  11
   1  -9  11 56.4695 12.3801  11
   1  -9  12 15.5328 9.39288  11
   1  -9  13 31.1295 7.71373  11
  -1 -10  13 17.8865 7.47579  11
  -1  10  12 70.9475 13.0503  11
  -1 -10  12 49.7826 9.54626  10
  -1 -10  12 63.3020 10.4985  11
  -1 -10  11 358.417 19.0209  10
  -1 -10  11 348.387 19.4133  11
  -1  10  11 317.074 22.0969  11
  -1 -10  10 1981.35 65.9022  10
  -1  10  10 2035.02 69.6734  11
  -1 -10  10 1968.00 65.9043  11
  -1 -10   9 1520.34 53.3106  11
  -1 -10   9 1639.08 54.0398  10
  -1  10   9 1497.83 56.6614  11
  -1 -10   8 381.381 19.4406  10
  -1  10   8 364.119 22.2446  11
   1  10  -7 53.4770 47.6221   5
  -1  10   7 50.2960 51.1615   4
  -1 -10   7 56.1640 45.6104  17
  -1 -10   7 30.1953 55.2382   3
   1 -10  -7 20.1789 55.0488   1
  -1  10   6 903.573 118.339   4
  -1 -10   6 1169.04 121.806  17
   1 -10  -6 1026.54 126.541   1
  -1  10   6 890.818 115.701   2
   1  10  -6 891.403 115.586   5
  -1  10   5 1146.35 122.461   4
  -1  10   5 1127.94 122.815   2
   1  10  -5 987.980 111.346   5
   1 -10  -5 958.539 113.619   1
  -1 -10   5 1078.59 111.131  17
   1 -10  -4 2047.79 154.289   1
  -1  10   4 2149.67 164.887   2
   1  10  -4 2182.23 151.389   5
  -1 -10   4 1947.83 143.030  17
  -1  10   4 2253.51 161.403   4
  -1  10   3 2342.13 156.313   4
   1  10  -3 2146.73 141.973   5
   1  10  -3 2174.95 153.818   2
  -1 -10   3 2307.85 149.166  15
  -1  10   3 2300.06 169.749   2
  -1 -10   3 2467.66 151.725  17
  -1  10   2 1482.65 133.482   2
  -1  10   2 1417.33 113.689   4
   1  10  -2 1370.68 118.316   2
   1 -10  -2 1530.26 120.911  17
  -1 -10   2 1448.79 110.263  17
   1  10  -2 1646.89 112.511   5
  -1 -10   2 1455.61 113.642  15
  -1  10   1 3054.22 166.035   4
  -1 -10   1 2785.71 158.913  17
   1  10  -1 3034.97 179.582   2
   1  10  -1 3036.99 156.398   5
  -1 -10   1 2808.76 164.282  15
  -1  10   1 2915.96 191.349   2
   1 -10  -1 2609.15 165.800  17
   1  10   0 419.619 64.1146  13
  -1 -10   0 335.722 57.1297  15
   1 -10   0 422.124 65.6175  17
  -1 -10   0 386.295 56.7544  17
   1  10   0 337.166 51.1582   5
  -1  10   0 464.729 78.3131   2
   1  10   1 518.394 69.8501  13
   1 -10   1 479.622 68.4836  17
  -1 -10  -1 364.419 55.9005  17
  -1 -10  -1 419.492 64.0226  15
  -1  10  -1 540.909 85.2521   2
  -1  10  -2 2819.15 200.970   2
   1 -10   2 2848.18 163.708  16
   1  10   2 2905.30 173.093  13
  -1 -10  -2 2834.07 176.575  15
   1 -10   2 2701.52 173.348  17
  -1 -10  -2 2768.21 165.137  17
  -1  10  -2 2866.04 164.439   5
   1 -10   3 719.949 82.2138  16
   1  10   3 786.300 90.6522  13
  -1  10  -3 912.282 100.847   5
   1 -10   3 792.002 93.4107  17
  -1  10  -3 707.883 105.611   2
  -1 -10  -3 743.549 91.5029  15
  -1  10  -4 197.012 61.3029   2
   1 -10   4 160.161 53.4279  17
  -1 -10  -4 176.432 54.8838  15
   1  10   4 123.557 48.4297  13
   1 -10   4 121.347 44.2416  16
  -1  10  -4 102.795 50.7759   5
  -1  10  -5 594.519 109.179   2
  -1 -10  -5 586.566 92.1498  15
  -1  10  -5 517.174 95.4567   5
   1 -10   5 613.521 94.8060  17
   1 -10   5 527.124 76.7640  16
   1  10   5 480.574 77.7202  13
   1  10   6 38.7449 44.4205  13
  -1 -10  -6 72.0100 52.9860  15
   1 -10   6 130.388 55.8653  17
  -1  10  -6 79.3077 64.4417   5
   1 -10   6 101.196 47.4607  16
  -1  10  -7 2499.12 83.7809   7
   1 -10   8 1294.85 47.0059  11
   1 -10   9 1550.35 54.4083  11
   1 -10  10 76.0794 13.1323  11
   1 -10  11 128.780 13.6537  11
   1 -10  12 26.6904 9.08515  11
   1 -10  13 64.0139 7.66001  11
  -1 -11  13 26.0754 7.05993  11
  -1 -11  12 568.002 23.9396  11
  -1 -11  12 590.848 23.8309  10
  -1 -11  11 264.738 16.3352  10
  -1  11  11 299.144 19.9751  11
  -1 -11  11 267.371 16.7396  11
  -1 -11  10 100.460 12.6256  11
  -1  11  10 111.859 16.3936  11
  -1 -11  10 137.380 13.2016  10
  -1  11   9 191.808 18.1211  11
  -1 -11   9 183.142 14.6183  10
  -1 -11   8 215.454 14.5753  10
  -1  11   8 177.386 17.5159  11
  -1  11   7 467.057 99.7853   4
   1 -11  -7 672.776 114.240   1
  -1 -11   7 477.771 98.1317   3
  -1 -11   7 492.516 22.3759  10
  -1 -11   7 543.577 95.8092  17
   1  11  -7 509.786 102.855   5
  -1  11   7 473.825 25.1241  11
   1 -11  -6 4093.02 269.605   1
  -1 -11   6 4466.48 264.123  17
  -1  11   6 3988.24 263.495   2
  -1  11   6 4535.92 279.075   4
   1  11  -6 4301.00 264.864   5
   1  11  -5 2004.76 162.936   5
  -1 -11   5 2184.27 165.840  17
  -1  11   5 2197.25 182.474   2
  -1  11   5 1940.24 167.897   4
   1 -11  -5 1933.00 167.884   1
  -1  11   4 2293.04 185.714   2
  -1  11   4 2549.67 180.189   4
  -1 -11   4 2421.04 165.241  17
   1  11  -4 2706.82 174.983   5
   1  11  -3 684.448 91.9850   2
   1 -11  -3 718.592 89.3455  17
  -1 -11   3 668.965 82.8912  15
  -1  11   3 715.717 87.7951   4
  -1  11   3 775.650 104.562   2
   1  11  -3 834.465 88.8992   5
  -1 -11   3 836.953 89.1143  17
  -1  11   2 607.195 93.6316   2
  -1  11   2 600.018 78.3608   4
  -1 -11   2 547.897 72.9715  17
   1  11  -2 547.279 81.8075   2
   1  11  -2 882.399 85.1681   5
   1 -11  -2 677.002 85.7441  17
  -1 -11   2 713.395 80.6992  15
   1 -11  -1 300.273 61.6436  17
   1  11  -1 325.580 52.8328   5
   1  11  -1 275.080 65.0422   2
  -1 -11   1 224.484 49.8681  17
  -1 -11   1 285.317 55.5636  15
  -1  11   1 339.185 72.9646   2
  -1  11   0 2005.37 166.276   2
   1  11   0 2088.55 149.052  13
  -1 -11   0 2012.76 141.896  15
   1  11   0 2080.84 127.088   5
  -1 -11   0 2011.13 137.240  17
   1 -11   0 2018.56 148.230  17
  -1 -11  -1 2273.01 151.723  17
   1  11   1 2564.11 169.572  13
   1  11   1 2571.88 145.190   5
  -1 -11  -1 2257.64 157.856  15
  -1  11  -1 2734.94 198.406   2
   1 -11   1 2680.91 172.517  17
  -1  11  -2 1125.78 131.454   2
  -1 -11  -2 1034.68 100.638  17
   1 -11   2 1104.48 100.866  16
   1 -11   2 1045.81 108.525  17
   1  11   2 1066.86 108.863  13
  -1 -11  -2 962.581 103.855  15
   1  11   3 1970.44 154.255  13
   1 -11   3 2171.72 146.351  16
   1 -11   3 2122.00 162.404  17
  -1  11  -3 2034.70 186.450   2
  -1 -11  -3 2260.83 166.407  15
   1 -11   4 836.588 106.340  17
  -1  11  -4 968.915 133.915   2
  -1  11  -4 769.721 105.660   5
   1 -11   4 838.231 91.7477  16
   1  11   4 699.990 95.5659  13
  -1 -11  -4 835.935 108.429  15
   1  11   5 37.8810 45.1015  13
   1 -11   5 6.81790 36.1608  17
  -1  11  -5 11.6037 53.3890   5
  -1 -11  -5-6.92399 49.9899  15
   1 -11   5 12.6581 37.2346  16
  -1  11  -5 39.8075 59.9796   2
  -1  11  -6 541.436 27.2577   7
  -1  11  -6 514.402 105.788   5
  -1 -11  -6 646.796 107.684  15
   1  11   6 399.967 82.2845  13
  -1  11  -7 642.634 31.3573   7
   1 -11   8 2232.08 73.1637  11
   1 -11   9 15.4558 11.4084  11
   1 -11  10 34.7933 10.9988  11
   1 -11  11 55.4219 10.9192  11
   1 -11  12 32.6118 8.15141  11
  -1 -12  12 28.8442 7.22169  10
  -1 -12  11 252.282 15.0645  10
  -1 -12  10 529.069 23.9279  10
  -1 -12   9 582.014 26.0825  10
  -1 -12   8 394.299 20.4640  10
  -1 -12   7 453.618 21.7077  10
  -1  12   6 440.093 91.9666   4
   1  12  -6 324.624 79.0827   5
  -1 -12   6 316.617 17.0092  10
  -1 -12   6 277.382 68.3989  17
  -1  12   6 334.289 85.9773   2
  -1  12   5 3043.54 216.809   4
  -1  12   5 2547.02 209.173   2
   1  12  -5 2356.12 187.187   5
  -1 -12   5 2865.50 198.738  17
  -1  12   4 799.395 104.926   4
   1  12  -4 907.730 104.060   5
  -1  12   4 651.535 105.816   2
   1 -12  -4 888.110 109.314  17
  -1 -12   4 866.798 101.275  17
  -1  12   3 2782.87 214.367   2
   1  12  -3 2923.41 205.912   2
   1  12  -3 2896.86 182.489   5
  -1 -12   3 3119.02 192.441  17
   1 -12  -3 3265.50 206.554  17
  -1 -12   3 3090.73 189.629  15
   1  12  -2 234.903 52.0717   5
   1 -12  -2 251.268 58.4953  17
  -1  12   2 366.627 81.1888   2
  -1 -12   2 294.658 57.3944  17
  -1 -12   2 387.462 64.6222  15
   1  12  -2 286.204 68.6150   2
  -1  12   1 4315.33 267.570   2
   1  12  -1 4166.22 247.068   2
  -1 -12   1 4181.42 226.567  17
   1 -12  -1 4329.41 239.441  17
  -1 -12   1 4462.89 232.808  15
   1  12  -1 4481.80 213.867   5
  -1  12   0 7492.54 388.595   2
  -1 -12   0 8267.80 348.323  17
   1  12   0 8150.10 377.597   2
   1 -12   0 8691.57 370.615  17
  -1 -12   0 7735.95 346.231  15
  -1 -12  -1 10343.6 417.116  17
  -1  12  -1 10653.6 479.979   2
   1  12   1 9768.98 431.234  13
  -1 -12  -1 10445.9 426.455  15
   1 -12   1 10648.8 438.851  17
  -1 -12  -2 125.603 46.8466  15
  -1 -12  -2 97.5615 44.5826  17
   1  12   2 77.8014 49.6550  13
  -1  12  -2 154.906 71.5431   2
   1 -12   2 100.225 43.3924  16
   1 -12   2 162.738 52.0518  17
  -1  12  -3 2252.78 201.535   2
  -1 -12  -3 1812.84 150.037  17
   1  12   3 2047.22 165.253  13
   1 -12   3 1935.10 160.748  17
   1 -12   3 1852.86 141.880  16
  -1 -12  -3 2120.30 166.605  15
  -1  12  -4 321.699 91.0415   2
  -1 -12  -4 218.714 65.8217  15
   1  12   4 291.246 68.1941  13
   1 -12   4 204.323 61.7887  17
   1 -12   4 286.820 60.7087  16
  -1  12  -5 98.4044 13.3737   7
   1  12   5 154.582 60.5687  13
   1 -12   5 137.589 59.6583  17
  -1 -12  -5 95.5223 57.3546  15
  -1  12  -6 340.213 21.9736   7
  -1  12  -7 4811.80 149.496   7
   1 -12   8 167.194 15.2631  11
   1 -12   9 196.785 15.8367  11
   1 -12  10 8.30388 9.91912  11
   1 -12  11 35.2476 9.36077  11
   1 -12  12 36.6020 7.45119  11
  -1  13  13 53.1813 7.95078   6
  -1 -13  12 270.288 13.3502  10
  -1 -13  11 309.639 16.1953  10
  -1 -13  10 40.8139 9.46042  10
  -1 -13   9 799.990 31.8603  10
  -1 -13   8 246.371 16.0924  10
  -1 -13   7 1451.51 50.2835  10
  -1 -13   6 687.632 28.1692  10
   1 -13  -5 42.6200 41.0568  17
   1  13  -5 110.474 60.6625   5
  -1 -13   5 111.912 51.8640  17
  -1  13   5 83.4408 62.8056   2
   1 -13  -4 1067.26 126.267  17
   1  13  -4 1492.13 140.132   5
  -1 -13   4 1507.12 139.706  17
  -1  13   4 1211.09 151.558   2
   1  13  -3 811.695 99.5324   5
  -1 -13   3 911.592 104.694  17
   1  13  -3 793.885 114.321   2
   1 -13  -3 873.312 108.979  17
  -1 -13   3 893.223 102.900  15
  -1  13   3 661.891 112.614   2
   1  13  -2 685.027 83.7613   5
  -1 -13   2 544.726 80.6690  15
  -1  13   2 697.458 111.375   2
   1 -13  -2 648.953 96.2267  17
   1  13  -2 785.528 106.459   2
  -1 -13   2 543.875 81.8850  17
   1 -13  -1 595.073 88.9692  17
   1  13  -1 532.542 93.0559   2
  -1 -13   1 692.320 89.1353  15
  -1  13   1 677.641 111.323   2
  -1 -13   1 614.041 84.7101  17
  -1  13   0 8695.54 428.508   2
   1  13   0 8555.21 402.357   2
  -1 -13   0 7949.75 362.101  15
   1 -13   0 8337.60 383.754  17
  -1 -13   0 8250.96 365.408  17
   1 -13   1 227.917 64.4372  17
  -1 -13  -1 188.043 54.3728  17
  -1  13  -1 179.471 73.9884   2
  -1 -13  -1 150.414 54.2500  15
   1  13   1 130.095 59.5600   2
   1 -13   2 143.662 58.2848  17
   1  13   2 277.839 68.5955  13
  -1  13  -2 281.020 87.4731   2
  -1 -13  -2 242.097 64.7957  15
  -1 -13  -2 285.532 62.6223  17
   1 -13   2 152.755 50.8733  16
  -1 -13  -3 5208.97 275.999  17
  -1 -13  -3 4662.96 272.172  15
  -1  13  -3 4854.48 322.601   2
   1 -13   3 4616.04 277.211  17
   1 -13   3 4691.65 250.575  16
   1  13   3 4956.49 288.043  13
   1  13   4 439.165 85.7401  13
  -1 -13  -4 473.836 85.1568  17
  -1  13  -4 518.803 115.291   2
  -1 -13  -4 409.424 83.3357  15
   1 -13   4 489.421 87.4597  17
  -1  13  -5 818.736 35.9183   7
  -1  13  -6 1184.40 46.8895   7
  -1  13  -7 3037.83 99.7184   7
   1 -13   8 387.270 20.8354  11
   1 -13   9 222.040 15.6254  11
   1 -13  10 198.280 14.4143  11
   1 -13  11 11.6675 7.40470  11
   1 -13  12 48.5678 6.77186  11
  -1 -14  12 51.0094 6.13977  10
  -1  14  12 53.8633 9.36893   6
  -1 -14  11 82.8964 8.88382  10
  -1 -14  10 15.6790 8.08937  10
  -1 -14   9 1397.72 48.2978  10
  -1 -14   8 362.017 19.1229  10
  -1 -14   7 379.255 19.8611  10
  -1 -14   6 212.691 14.3286  10
  -1  14   5 67.1891 13.1873   6
  -1  14   4 579.690 113.673   2
  -1  14   4 489.163 26.1630   6
   1 -14  -4 552.925 94.0017  17
  -1 -14   4 547.397 92.5438  17
   1 -14  -3 607.508 99.6438  17
  -1 -14   3 537.809 85.1708  17
  -1  14   3 443.751 98.6551   2
   1 -14  -2 1019.24 119.368  17
  -1  14   2 1048.80 141.008   2
  -1 -14   2 904.223 109.085  17
   1  14  -2 820.706 123.123   2
  -1 -14   2 1074.57 113.959  15
  -1  14   1 10587.2 505.363   2
   1 -14  -1 10150.1 452.786  17
  -1 -14   1 9685.03 424.726  15
   1  14  -1 10295.1 477.685   2
  -1 -14   1 10346.3 437.272  17
   1 -14   0 4848.32 282.470  17
  -1 -14   0 4858.87 268.243  17
   1  14   0 5000.16 303.626   2
  -1  14   0 5149.21 327.487   2
  -1 -14   0 4947.89 268.364  15
  -1  14  -1 1684.71 182.807   2
   1 -14   1 1451.97 145.627  17
   1  14   1 1398.41 154.349   2
  -1 -14  -1 1350.12 132.766  17
  -1 -14  -1 1455.84 137.176  15
   1  14   2 1017.02 137.780   2
  -1  14  -2 1101.42 152.632   2
  -1 -14  -2 1139.95 124.429  15
   1 -14   2 1073.82 126.227  17
   1 -14   2 1233.87 118.859  16
  -1 -14  -2 1007.61 114.920  17
  -1  14  -3 493.705 26.4063   7
  -1  14  -3 571.538 27.9921   6
   1 -14   3 431.790 84.3890  17
  -1 -14  -3 430.798 82.7618  15
  -1  14  -4 5.70724 11.1253   7
   1  14   4-1.68506 10.2345   6
  -1  14  -5 1241.96 48.6246   7
  -1  14  -6 174.858 18.0279   7
  -1  14  -7 1066.53 43.7861   7
   1 -14   8 279.205 17.3236  11
   1 -14   9 58.8840 10.7044  11
   1 -14  10 12.8389 8.19942  11
   1 -14  11 126.894 9.79147  11
   1  14  11 132.849 10.9893   6
  -1  15  12 50.5968 8.17771   6
  -1 -15  11 302.709 14.1437  10
  -1  15  11 319.785 18.4235   6
  -1  15  10 330.679 21.0266   6
  -1 -15  10 300.807 15.6206  10
  -1 -15   9 440.297 20.7150  10
  -1 -15   8 614.141 26.0557  10
  -1 -15   7 2082.12 68.3492  10
  -1  15   7 2114.34 74.7165   6
  -1  15   6 2123.32 74.4260   6
  -1 -15   6 2074.14 68.2154  10
  -1  15   5 785.921 36.2639   6
  -1  15   4 547.150 28.3659   6
   1  15  -3 4547.27 142.039   6
  -1  15   3 4708.18 144.121   6
  -1 -15   3 4620.78 136.246   9
   1  15  -2 187.969 82.9185   2
  -1  15   2 315.838 21.0173   6
  -1  15   2 311.365 83.5290   2
   1 -15  -2 298.344 79.3270  17
  -1 -15   2 384.386 76.2145  15
  -1  15   1 326.225 20.9751   6
  -1 -15   1 373.565 76.3481  15
  -1  15   1 420.192 102.180   2
   1 -15  -1 242.306 65.3063  17
   1  15  -1 300.274 84.5599   2
   1 -15   0 1860.43 168.490  17
   1  15   0 1738.50 180.101   2
  -1 -15   0 1661.35 149.887  15
  -1  15   0 1796.49 63.5086   6
  -1  15   0 1850.45 196.976   2
   1 -15   1 5170.02 295.481  17
  -1  15  -1 4988.58 336.691   2
   1  15   1 5018.55 318.236   2
  -1  15  -1 4662.01 143.765   6
  -1  15  -1 4521.67 142.649   7
  -1 -15  -1 4816.04 271.078  15
  -1  15  -2 532.422 27.2146   7
   1  15   2 497.032 25.8626   6
  -1  15  -2 511.326 27.2072   6
  -1  15  -3 322.699 20.8928   7
  -1  15  -3 289.079 20.6867   6
   1  15   3 265.479 19.1171   6
  -1  15  -4 475.636 26.7285   7
   1  15   4 513.168 26.8204   6
   1  15   5 981.394 41.1759   6
  -1  15  -5 1007.05 41.9079   7
  -1  15  -6 517.577 27.1733   7
   1  15   6 420.785 25.3036   6
  -1  15  -7 566.130 29.4689   7
   1 -15   7 611.967 26.2056  11
   1 -15   8 79.7533 11.1240  11
   1  15   9 105.104 13.0985   6
   1 -15   9 111.382 11.0765  11
   1 -15  10 6.16787 7.29189  11
   1  15  10 15.6903 8.27947   6
   1  15  11 103.951 8.56253   6
   1 -15  11 93.2597 7.45009  11
  -1  16  11 189.497 13.3360   6
  -1 -16  11 156.283 8.82909  10
  -1  16  10 20.1293 10.7462   6
  -1 -16  10 14.2269 6.30564  10
  -1  16   9 681.434 31.1493   6
  -1 -16   9 617.006 25.1143  10
  -1  16   8 229.910 20.0761   6
  -1 -16   8 202.927 13.7294  10
  -1  16   7 1192.87 47.6942   6
  -1 -16   7 1152.49 41.7182  10
  -1  16   6 135.151 16.9320   6
  -1 -16   6 124.810 11.9750  10
  -1  16   5 744.694 35.5719   6
  -1  16   4 160.362 17.2670   6
  -1  16   3 1237.54 48.3860   6
   1  16  -3 1178.52 46.3114   6
   1  16  -2 1819.92 64.4661   7
   1  16  -2 1903.38 65.9653   6
  -1  16   2 1979.07 67.8628   6
   1  16  -1 4614.19 144.517   7
  -1  16   1 4812.33 147.432   6
   1  16  -1 4762.70 145.461   6
  -1  16   0 508.175 26.9240   7
  -1  16   0 490.272 27.3386   6
   1  16   0 506.255 26.0079   6
  -1  16  -1 81.4118 13.3849   7
  -1  16  -1 92.5991 14.8456   6
   1  16   1 55.0010 12.4092   6
   1  16   2 878.207 37.1044   6
  -1  16  -2 880.162 37.9838   7
  -1  16  -2 860.030 38.4767   6
  -1  16  -3 3599.47 117.344   6
  -1  16  -3 3615.42 116.431   7
   1  16   3 3687.55 115.933   6
   1  16   4 2389.98 81.5185   6
  -1  16  -4 2446.77 82.4835   7
   1  16   5 2132.83 75.6669   6
  -1  16  -5 2309.26 77.0674   7
   1  16   6 131.004 15.3892   6
  -1  16  -6 156.734 16.3651   7
  -1  16  -7 173.508 17.2987   7
   1 -16   7 207.607 14.5863  11
   1  16   7 172.989 16.2843   6
   1  16   8 65.6045 12.0200   6
   1 -16   8 63.3961 9.52223  11
   1 -16   9 60.0399 8.64056  11
   1  16   9 73.9512 10.7246   6
   1  16  10 12.9941 6.78482   6
   1 -16  10 27.7960 6.48439  11
  -1  17  11-1.35925 6.85301   6
  -1 -17  10 23.3076 5.54627  10
  -1  17  10 22.6744 9.57121   6
  -1  17   9 131.154 14.9949   6
  -1 -17   9 126.693 9.78843  10
  -1  17   8 130.659 16.2893   6
  -1 -17   8 143.185 10.9975  10
  -1 -17   7 251.164 15.2743  10
  -1  17   7 252.926 20.9378   6
  -1  17   6 255.360 20.7511   6
  -1 -17   6 208.863 14.3310  10
  -1  17   5 342.889 23.8119   6
  -1  17   4 777.737 36.8754   6
   1  17  -3 1187.13 46.5974   6
  -1  17   3 1210.11 48.6171   6
   1  17  -2 1892.04 67.5230   7
   1  17  -2 2046.22 69.3810   6
  -1  17   2 2041.98 71.1603   6
   1  17  -1 888.372 37.0377   7
  -1  17   1 907.258 39.6058   6
   1  17  -1 878.142 37.5177   6
  -1  17   0 8033.08 239.476   7
  -1  17   0 8175.52 240.634   6
   1  17   0 7871.44 238.303   6
  -1  17  -1 257.911 20.6201   7
  -1  17  -1 272.484 21.1560   6
   1  17   1 280.278 19.6494   6
  -1  17  -2 1297.82 50.7535   7
  -1  17  -2 1298.06 51.3343   6
   1  17   2 1305.89 49.7135   6
  -1  17  -3 430.278 25.9467   7
   1  17   3 434.073 24.7421   6
  -1  17  -4 536.122 28.6315   7
   1  17   4 546.078 28.1371   6
  -1  17  -5 77.1199 14.2179   7
   1  17   5 72.3562 13.1550   6
   1  17   6 246.562 18.7008   6
  -1  17  -6 230.622 18.7988   7
   1  17   7 509.915 25.7056   6
   1 -17   7 537.369 22.5255  11
   1 -17   8 51.5019 8.51715  11
   1  17   8 59.0970 11.0586   6
   1  17   9 167.200 12.5038   6
   1 -17   9 167.969 10.3423  11
  -1  18  10 15.4707 7.86174   6
  -1  18   9 246.280 16.6500   6
  -1 -18   9 228.421 11.6044  10
  -1  18   8 247.069 17.8805   6
  -1 -18   8 209.834 12.5983  10
  -1  18   7 31.8212 12.6612   6
  -1 -18   7 50.6569 8.41787  10
  -1  18   6 206.277 18.8383   6
  -1 -18   6 184.889 13.1812  10
  -1  18   5 59.4904 14.3114   6
  -1 -18   5 54.9240 9.29357  10
  -1  18   4 82.0352 15.3216   6
  -1  18   3 426.949 26.8566   6
   1  18  -2 5123.54 157.439   7
   1  18  -2 5316.98 158.785   6
  -1  18   2 5028.54 160.530   6
   1  18  -1 17280.4 511.481   7
  -1  18   1 17955.2 514.052   7
   1  18  -1 17877.7 512.808   6
  -1  18   1 18178.2 515.173   6
   1  18   0 3003.14 97.6280   7
   1  18   0 3015.29 98.2348   6
  -1  18   0 3047.33 100.442   6
  -1  18   0 3000.81 99.2496   7
  -1  18  -1 227.363 19.6459   7
  -1  18  -1 219.125 20.2246   6
   1  18   1 197.356 17.9444   6
  -1  18  -2 57.5665 14.1300   7
  -1  18  -2 70.0973 15.0338   6
   1  18   2 64.0380 12.9450   6
   1  18   3 144.102 15.3940   6
  -1  18  -3 154.150 17.0750   7
   1  18   4 157.589 15.6142   6
  -1  18  -4 136.418 16.0664   7
  -1  18  -5 268.950 19.4269   7
   1  18   5 265.467 18.9131   6
   1  18   6 400.186 22.3939   6
  -1  18  -6 404.187 23.0542   7
   1  18   7 261.908 16.9080   6
   1  18   8 23.1864 8.27205   6
   1  18   9 19.8084 6.40588   6
  -1  19   9 104.335 10.9804   6
  -1  19   8 167.379 14.2297   6
  -1 -19   8 136.344 9.26268  10
  -1  19   7 28.9678 11.8735   6
  -1 -19   7 45.3207 7.49701  10
  -1  19   6 211.108 18.3090   6
  -1 -19   6 203.133 12.6273  10
  -1  19   5 363.940 23.4420   6
  -1 -19   5 357.130 17.6333  10
  -1  19   4 652.312 32.1278   6
  -1  19   3 814.982 37.3361   6
   1  19  -2 167.844 14.9273   7
  -1  19   2 144.166 16.6524   7
  -1  19   2 166.395 17.9714   6
   1  19  -2 189.369 16.6892   6
   1  19  -1 212.465 17.8785   6
  -1  19   1 233.674 20.4667   6
  -1  19   1 222.861 19.5198   7
   1  19  -1 193.774 16.7388   7
  -1  19   0 72.4957 15.2794   7
  -1  19   0 49.7511 14.7655   6
   1  19   0 52.0543 12.2020   6
   1  19   0 54.8570 12.1374   7
  -1  19  -1 3764.85 121.620   7
  -1  19  -1 3935.67 122.839   6
   1  19   1 3791.11 120.307   6
   1  19   1 3807.96 120.045   7
  -1  19  -2 543.427 29.1343   6
   1  19   2 523.091 26.6518   6
  -1  19  -2 501.775 27.5738   7
   1  19   3 86.1809 13.3705   6
  -1  19  -3 105.786 15.0119   7
  -1  19  -4 16.6468 11.7505   7
   1  19   4 26.8674 10.5491   6
   1  19   5 245.818 17.2286   6
  -1  19  -5 253.619 18.4042   7
  -1  19  -6 58.9386 11.3961   7
   1  19   6 50.5504 9.95493   6
   1  19   7 23.0433 7.99999   6
   1  19   8 8.22877 6.40222   6
  -1  20   9 3.52002 6.43789   6
  -1  20   8 347.600 18.1252   6
  -1 -20   7 106.257 8.14962  10
  -1  20   7 132.546 13.2926   6
  -1  20   6 196.892 16.7510   6
  -1 -20   6 179.489 11.1861  10
  -1  20   5 47.0813 12.7262   6
  -1 -20   5 57.8053 7.96482  10
  -1  20   4 52.5901 13.6832   6
  -1  20   3 813.237 35.9514   7
  -1  20   3 796.683 36.1469   6
  -1  20   2 57.5558 13.8654   7
  -1  20   2 51.9596 13.7619   6
   1  20  -1 343.377 20.3578   7
  -1  20   1 321.716 22.5863   6
   1  20  -1 355.060 20.9898   6
  -1  20   1 339.786 22.1730   7
  -1  20   0 395.551 23.8316   7
   1  20   0 351.928 20.7973   7
   1  20   0 364.883 21.3217   6
  -1  20   0 365.278 23.4435   6
   1  20   1 493.585 25.1015   7
  -1  20  -1 486.421 27.3928   6
   1  20   1 485.698 25.1041   6
  -1  20  -1 542.712 27.5428   7
   1  20   2 29.9773 10.8596   7
   1  20   2 29.2106 11.2185   6
  -1  20  -2 20.8297 12.1043   7
  -1  20  -3 18.6258 11.8001   7
   1  20   3 16.1288 10.2966   6
   1  20   4 124.877 13.0384   6
  -1  20  -4 133.829 14.3546   7
  -1  20  -5 164.427 14.3257   7
   1  20   5 160.281 13.2001   6
   1  20   6 15.6802 8.00013   6
   1  20   7 48.5608 7.60805   6
  -1  21   8 79.8028 8.51562   7
  -1  21   8 96.3256 9.01717   6
  -1  21   7 46.9166 9.33555   6
  -1  21   6 19.2686 9.85832   6
  -1 -21   6 9.24324 4.90537  10
  -1  21   5 62.4644 11.9348   6
  -1  21   5 59.0660 11.8389   7
  -1 -21   5 64.0684 7.19505  10
  -1  21   4 107.634 13.8314   7
  -1 -21   4 100.673 9.09658  10
  -1  21   3 47.1382 12.5419   7
  -1  21   3 58.0622 12.9084   6
  -1  21   2 163.533 16.5386   7
  -1  21   2 183.113 16.6923   6
  -1  21   1 77.6667 13.9492   6
  -1  21   1 92.3298 14.3722   7
   1  21  -1 92.5923 11.8245   7
  -1  21   0 96.1498 14.6301   7
   1  21   0 82.5913 11.9352   6
  -1  21   0 78.9230 14.3378   6
   1  21   0 66.5447 10.8596   7
   1  21   1 342.384 20.1925   7
   1  21   1 413.502 21.1009   6
  -1  21  -1 402.722 22.7113   7
  -1  21  -2 7.26150 10.4614   7
   1  21   2 8.15065 9.41442   7
   1  21   2 7.30077 9.32138   6
  -1  21  -3 281.126 17.9298   7
   1  21   3 248.065 16.6855   7
   1  21   3 259.149 16.2867   6
   1  21   4 105.591 11.4370   7
  -1  21  -4 98.5055 12.0520   7
   1  21   4 91.4795 11.6914   6
  -1  21  -5 23.8799 8.80705   7
   1  21   5 33.2315 7.88474   6
   1  21   6 47.4838 7.57852   6
  -1  22   7 22.5843 6.54460   7
  -1  22   7 16.6967 6.25117   6
  -1  22   6 7.36929 7.55347   7
  -1  22   6 3.92803 7.68938   6
  -1  22   5 25.3382 8.95620   7
  -1  22   5 27.2770 9.08627   6
  -1  22   4 148.482 13.3567   6
  -1 -22   4 114.885 8.21641  10
  -1  22   4 143.755 13.4753   7
  -1  22   3 209.307 15.6056   7
  -1  22   3 189.737 15.6310   6
  -1 -22   3 181.424 10.8305  10
  -1  22   2 1210.05 44.7823   7
  -1  22   2 1222.63 45.4315   6
  -1  22   1 269.675 19.1280   6
  -1  22   1 258.848 17.6553   7
   1  22   0 204.039 13.9287   7
  -1  22   0 205.549 16.6543   6
  -1  22   0 203.340 15.9501   7
  -1  22  -1 136.285 13.6704   7
   1  22   1 141.974 12.1573   6
   1  22   1 141.992 12.2532   7
   1  22   2 50.7381 8.71916   7
   1  22   2 45.7128 8.81402   6
  -1  22  -2 57.0130 10.5960   7
  -1  22  -3 206.357 14.3310   7
   1  22   3 188.550 12.9513   7
   1  22   3 200.337 12.9681   6
   1  22   4 46.6222 8.35676   7
  -1  22  -4 63.9778 9.38478   7
   1  22   5 6.09648 6.34491   7
  -1  23   5 34.1446 7.65613   7
  -1  23   5 35.7814 7.50617   6
  -1  23   4 39.4450 8.52551   7
  -1  23   4 45.8307 8.79366   6
  -1  23   3 230.342 14.6272   7
  -1  23   3 228.212 14.7173   6
  -1  23   2 212.934 14.7100   6
  -1  23   2 184.135 13.7750   7
  -1  23   1 103.130 11.3296   6
  -1  23   1 84.5976 11.2029   7
  -1  23   0 589.092 25.2468   7
  -1  23  -1 89.9640 10.7948   7
   1  23   2 19.0847 7.03188   7
  -1  23  -2 17.3634 8.36560   7
   1  23   3 95.6449 8.69780   7
  -1  23  -3 99.5820 9.65824   7
  -1  24   3 94.4184 8.82675   7
  -1  24   3 82.9780 8.41734   6
  -1  24   2 18.8272 7.10568   7
  -1  24   1 404.556 18.1526   7
  -1  24   0 74.8520 8.71665   7
  -1  24  -1 182.912 11.4239   7
  -2   0  15 29.6850 6.54974  12
  -2   0  15 36.7336 9.34482  11
  -2   0  14 868.217 33.5412  12
  -2   0  14 965.085 36.4521  11
  -2   0  13 38.1406 13.6478  11
  -2   0  12 37.8241 13.3944  11
  -2   0  11 33.6011 13.1158  11
  -2   0  10 38.7927 10.9104  11
  -2   0  10 53.6970 9.55897  10
  -2   0   9 125.760 66.6089   4
   2   0  -9 139.476 63.8816   1
   2   0  -9 94.3344 57.0851   5
  -2   0   8 7616.59 345.716   3
   2   0  -8 6831.10 330.826   5
   2   0  -8 7660.66 353.480   1
  -2   0   8 6958.33 346.080   4
  -2   0   7 2602.56 172.348   3
   2   0  -7 2558.53 162.142   5
  -2   0   7 2301.04 165.391   4
   2   0  -7 2510.76 168.864   1
  -2   0   6 116.178 46.1968   3
   2   0  -6 171.080 50.5111   1
  -2   0   6 136.638 47.2166   4
   2   0  -6 226.721 48.2034   5
  -2   0   5 6017.02 252.201   4
  -2   0   5 6003.58 266.901   3
   2   0  -5 5693.36 247.568   1
   2   0  -5 5639.68 227.575   5
  -2   0   4 11150.9 397.893   4
  -2   0   4 12223.8 424.830   3
   2   0  -4 11243.2 373.553   5
   2   0  -3 27135.1 766.640  13
   2   0  -3 26691.5 798.582   5
  -2   0   3 25584.2 823.605   4
  -2   0   2 999999. 26838.0  15
  -2   0   2 974582. 26873.6   4
  -2   0   1 9172.33 323.749   4
   2   0  -1 9348.44 276.233  17
  -2   0   1 9394.89 323.045   2
  -2   0   1 9308.59 294.927  15
  -2   0   1 9262.57 319.353   3
  -2   0   0 35135.8 1052.89   2
  -2   0   0 33540.8 1014.29   3
   2   0   0 34558.0 989.019  17
   2   0   0 35204.4 1007.33  16
  -2   0   0 34060.3 1010.65  15
   2   0   1 8519.32 280.534  17
   2   0   1 8827.39 292.093  16
   2   0   2 2097.22 109.080  16
  -2   0  -2 2133.32 111.854   1
  -2   0  -3 11085.1 390.529   1
   2   0   3 10798.0 382.316  16
  -2   0  -4 5700.81 260.025   1
   2   0   4 5995.29 255.094  16
   2   0   4 6287.08 257.091  13
   2   0   5 6971.20 287.609  13
   2   0   5 6899.97 297.821  16
  -2   0  -5 6278.59 297.525   1
   2   0   6 477.371 68.4173  13
  -2   0  -6 536.998 84.5455   1
   2   0   6 622.148 84.8769  16
   2   0   7-12.1930 37.1241  13
   2   0   7 5.99631 40.2089  16
   2   0   8 90.4583 11.7360  11
   2   0   9 394.484 21.2426  11
   2   0  10 2578.13 83.5292  11
   2   0  11 127.539 14.2049  11
   2   0  12 211.454 14.9313  11
   2   0  13 0.45269 6.74573  11
  -2  -1  15 6.29058 5.93221  12
  -2   1  15 11.1821 5.76732  12
  -2   1  15 7.95512 8.90352  11
  -2  -1  15 18.9790 8.44268  11
  -2   1  14 67.1905 9.29747  12
  -2   1  14 68.1193 13.1447  11
  -2  -1  14 74.9250 12.8516  11
  -2   1  13 166.643 17.3470  11
  -2  -1  13 147.655 16.4524  11
  -2  -1  12 568.370 28.9818  11
  -2   1  12 561.387 28.6717  11
  -2   1  11 1833.26 65.6185  11
  -2  -1  11 1892.87 65.5579  11
  -2  -1  11 1968.28 64.1529  10
  -2   1  10 872.322 131.303   4
  -2  -1  10 820.250 33.5747  11
  -2   1  10 744.876 33.3867  11
  -2  -1  10 842.784 32.1996  10
  -2   1  10 789.288 31.5857  10
  -2   1   9 401.409 90.3453   4
   2   1  -9 382.391 85.5993   5
  -2  -1   9 300.013 77.0776   4
   2  -1  -9 305.647 78.1421   1
   2   1  -9 493.287 91.2254   1
  -2   1   8 6669.33 336.696   4
  -2  -1   8 6144.65 316.888   4
  -2   1   8 6730.90 317.989   3
  -2  -1   8 7066.15 330.913   3
   2  -1  -8 7033.98 335.859   1
   2  -1  -8 6311.21 307.284   5
   2   1  -8 6383.71 317.795   5
   2   1  -8 6657.69 326.132   1
  -2   1   7 12052.1 454.143   3
  -2  -1   7 9903.93 432.241   4
  -2  -1   7 11935.5 462.810   3
   2  -1  -7 11379.7 430.751   5
   2  -1  -7 12152.9 455.396   1
   2   1  -7 11381.1 438.734   5
   2   1  -7 11302.4 448.605   1
  -2   1   7 10155.5 447.729   4
   2   1  -6 2841.10 166.990   1
  -2   1   6 2612.47 166.331   4
   2  -1  -6 2682.45 147.391   5
  -2   1   6 2934.33 173.036   3
  -2  -1   6 2845.12 176.869   3
   2   1  -6 2607.39 151.638   5
  -2  -1   6 2543.69 157.521   4
   2  -1  -6 2995.43 169.828   1
   2  -1  -5 14560.7 497.417   1
  -2   1   5 14850.7 509.357   4
   2   1  -5 14168.0 497.985   1
  -2   1   5 14927.1 517.905   3
  -2  -1   5 14351.0 518.290   3
  -2  -1   5 14360.0 493.254   4
   2  -1  -5 13771.6 468.598   5
   2   1  -5 14374.7 480.099   5
  -2  -1   4 9014.30 313.977   4
   2  -1  -4 8789.95 314.140   1
  -2   1   4 8759.39 324.859   4
   2  -1  -4 9087.90 289.563   5
  -2  -1   4 9276.14 339.585   3
   2   1  -4 9227.90 301.551   5
  -2   1   4 9359.92 339.574   3
   2   1  -3 26257.7 779.745  13
  -2   1   3 28261.4 852.910   4
  -2   1   3 28156.8 812.402   2
  -2  -1   3 27715.6 837.230   4
   2  -1  -3 29954.8 810.371   5
   2   1  -3 28770.7 824.816   5
  -2  -1   3 28561.4 826.082  15
  -2  -1   2 112624. 3187.35   4
  -2  -1   2 108001. 3169.18  15
   2   1  -2 115785. 3150.10  13
  -2  -1   2 114488. 3180.75  14
  -2   1   2 114491. 3201.58   4
  -2   1   2 108490. 3177.88   2
  -2   1   1 67475.4 1910.84  15
  -2  -1   1 65404.0 1949.04   3
   2  -1  -1 68677.6 1914.39  17
  -2  -1   1 65888.3 1947.92   4
  -2   1   1 68106.0 1950.63   3
   2   1  -1 69004.2 1910.54  16
  -2   1   1 68794.0 1958.01   2
  -2  -1   1 68079.1 1948.72  14
   2   1  -1 65052.7 1924.53  13
  -2  -1   1 63974.2 1930.39  15
   2  -1   0 6435.50 208.093  17
   2   1   0 6399.89 224.385  13
   2   1   0 6366.98 211.513  16
  -2   1   0 5964.64 222.706   3
  -2  -1   0 6413.60 224.834   3
  -2   1   0 6495.42 211.323  15
   2  -1   0 6479.28 221.707  16
  -2  -1   0 6134.24 225.146  15
  -2   1   0 6212.83 252.905   2
   2   1   1 5475.61 194.769  16
   2  -1   1 5330.34 191.318  17
  -2  -1  -1 5262.19 179.537   3
   2  -1   1 5155.60 199.075  16
  -2  -1  -1 5714.64 211.943  15
   2  -1   2 136.712 32.1629  16
   2  -1   2 171.587 32.4094  17
  -2   1  -2 173.813 29.9908   1
   2   1   2 187.670 38.1295  13
   2   1   2 122.709 30.5167  16
  -2   1  -2 172.156 42.1448  14
  -2  -1  -2 203.009 41.0951   1
  -2   1  -3 4176.11 180.923   1
   2  -1   3 4231.06 185.081  16
   2  -1   3 4039.75 183.685  17
   2   1   3 4100.26 186.476  13
   2   1   3 3941.96 179.831  16
  -2  -1  -3 3927.96 193.555   1
   2   1   4 1757.30 114.642  13
  -2  -1  -4 1525.82 118.758   1
  -2   1  -4 1525.54 110.783   1
   2   1   4 1597.05 113.146  16
   2  -1   4 1612.94 111.829  16
  -2  -1  -5 2117.93 154.732   1
  -2   1  -5 2062.80 142.316   1
   2   1   5 2194.08 139.288  13
   2  -1   5 2253.24 141.565  13
   2   1   5 2479.58 153.992  16
   2  -1   5 2096.21 142.985  16
   2  -1   6 3256.75 184.960  13
  -2  -1  -6 2803.28 201.154   1
   2   1   6 3291.03 201.280  16
   2   1   6 3396.06 186.055  13
   2  -1   6 3504.03 203.208  16
   2   1   7 818.908 91.6767  13
   2  -1   7 1007.74 98.9240  13
   2   1   7 812.814 109.426  16
   2  -1   7 1137.24 123.594  16
   2   1   8 155.327 13.3743  11
   2  -1   8 150.356 13.7013  11
   2   1   9 259.303 17.2447  11
   2  -1   9 249.526 17.3605  11
   2   1  10 88.7105 13.3081  11
   2  -1  10 111.253 14.2606  11
   2   1  11 536.202 25.5224  11
   2  -1  11 530.288 25.7005  11
   2   1  12 9.62486 8.83783  11
   2  -1  12-4.57562 9.12134  11
   2   1  13 122.086 9.86642  11
   2  -1  13 126.546 10.2776  11
  -2   2  15 23.5965 8.92759  11
  -2  -2  15 18.2073 8.01976  11
  -2   2  15 17.0159 5.64864  12
  -2  -2  15 8.83835 6.21754  12
  -2   2  14 122.090 10.7781  12
  -2   2  14 130.871 14.7611  11
  -2  -2  14 127.447 13.8529  11
  -2  -2  13 242.668 18.5547  11
  -2   2  13 231.907 19.3710  11
  -2   2  12 130.316 16.5462  11
  -2  -2  12 126.852 15.6156  11
  -2  -2  11 457.916 25.2987  11
  -2   2  11 491.466 26.1944  11
  -2  -2  11 516.227 24.1579  10
  -2  -2  10 2110.36 67.9674  10
  -2   2  10 1993.07 69.5176  11
  -2  -2  10 2085.46 69.0254  11
   2   2  -9 1117.06 131.419   1
  -2   2   9 1026.71 133.976   4
   2  -2  -9 1268.38 143.190   1
   2   2  -9 1004.63 130.857   5
   2   2  -8 5452.22 292.684   1
  -2  -2   8 5369.25 282.357   4
  -2   2   8 5151.39 298.329   4
  -2   2   8 5929.31 287.844   3
  -2  -2   8 5761.70 299.522   3
   2  -2  -8 5896.35 302.774   1
   2   2  -8 5831.95 298.870   5
   2   2  -7 196.000 57.0067   1
  -2   2   7 196.087 54.7107   3
  -2  -2   7 256.648 57.5052   4
  -2   2   7 188.680 59.4934   4
   2  -2  -7 312.692 67.6507   1
   2  -2  -7 184.213 48.5594   5
  -2  -2   7 255.909 65.2722   3
   2   2  -7 207.787 59.0004   5
  -2  -2   6 5293.00 243.626   4
   2   2  -6 5701.10 262.083   1
   2   2  -6 5446.21 246.842   5
  -2   2   6 5805.49 265.636   3
  -2  -2   6 5878.72 275.178   3
   2  -2  -6 5681.32 236.461   5
   2  -2  -6 5526.00 256.400   1
  -2   2   6 5351.12 266.604   4
   2   2  -5 813.767 75.6277   5
  -2  -2   5 967.068 78.2803   4
  -2   2   5 857.500 88.3529   4
  -2   2   5 1100.25 97.6368   3
  -2  -2   5 1025.28 98.1475   3
   2  -2  -5 1007.59 71.9819   5
   2  -2  -5 1038.16 88.1280   1
  -2   2   4 8946.70 332.055   4
  -2   2   4 8446.64 285.390   2
  -2   2   4 8143.83 327.101   3
  -2  -2   4 8148.43 331.389   3
  -2  -2   4 8333.55 302.039   4
   2  -2  -4 8684.15 282.560   5
   2  -2  -4 8384.61 310.482   1
   2   2  -4 8887.07 305.883   5
   2   2  -3 11635.9 348.285  13
   2  -2  -3 11828.5 389.391   1
  -2   2   3 12022.7 415.727   4
  -2   2   3 11645.9 384.958   2
  -2  -2   3 11724.9 389.393   4
  -2   2   3 12761.7 421.861   3
   2  -2  -3 12296.1 362.975   5
   2   2  -3 11661.1 389.682   5
  -2  -2   3 11838.4 391.059  15
  -2  -2   2 88625.3 2595.09   4
   2   2  -2 90084.0 2567.96  13
   2  -2  -2 90067.1 2582.94   1
  -2   2   2 88072.7 2605.85   2
  -2  -2   2 91822.6 2620.30   3
  -2  -2   2 92238.6 2594.23  14
  -2  -2   2 94081.7 2599.68  15
  -2   2   1 33653.5 975.051   3
  -2  -2   1 32199.5 969.403   3
   2  -2  -1 32023.4 945.410  17
  -2  -2   1 33201.8 966.989  14
   2   2  -1 33558.6 946.912  13
  -2   2   1 31170.7 916.112  15
  -2  -2   1 32868.9 962.887  15
   2   2  -1 33447.6 922.771  16
  -2   2   1 31541.4 981.824   2
   2   2   0 10535.0 318.023  16
  -2  -2   0 9898.59 343.285  15
   2   2   0 9803.83 333.362  13
  -2  -2   0 10348.1 351.062  14
  -2  -2   0 10413.1 336.151   3
   2  -2   0 10020.1 326.664  17
  -2   2   0 10450.5 312.882  15
  -2   2   0 9500.37 367.468   2
  -2   2  -1 1108.66 83.7338  14
   2   2   1 1165.06 74.4172  13
   2  -2   1 1197.35 70.3934  17
  -2  -2  -1 1175.15 61.0970   3
   2   2   1 1251.14 69.0316  16
  -2   2  -1 1229.04 99.0378   2
   2  -2   1 1125.14 74.1882  16
  -2  -2  -1 1108.90 79.6412  15
   2  -2   2 25344.4 785.792  17
  -2   2  -2 26707.0 850.309   2
   2  -2   2 25763.7 790.663  16
   2   2   2 25885.4 791.622  13
   2   2   2 25916.8 783.474  16
  -2   2  -2 25443.1 762.612   1
  -2   2  -2 24945.0 807.103  14
  -2  -2  -2 25330.6 807.639   1
   2   2   3 8612.09 322.023  13
   2  -2   3 8697.79 325.952  17
   2   2   3 8520.00 319.657  16
  -2   2  -3 8683.44 341.706  14
  -2  -2  -3 9207.91 348.429   1
   2  -2   3 8662.23 322.966  16
  -2   2  -3 8650.37 306.619   1
   2   2   4 54713.1 1626.30  13
  -2   2  -4 52995.4 1615.04   1
   2  -2   4 54745.9 1631.49  16
   2   2   4 55503.8 1634.12  16
   2  -2   4 54160.9 1639.56  17
  -2  -2  -4 54179.9 1663.23   1
  -2  -2  -5 2941.67 192.510   1
   2   2   5 3107.49 179.938  16
   2   2   5 3001.35 166.573  13
   2  -2   5 2883.35 170.969  16
   2   2   6 471.572 76.8091  16
   2  -2   6 558.403 74.3958  13
  -2  -2  -6 485.815 85.2233   1
   2  -2   6 512.869 77.9877  16
   2   2   6 593.189 74.0185  13
  -2  -2  -7 447.607 92.5443   1
   2  -2   7 526.484 76.1390  13
   2   2   7 506.332 74.8344  13
   2   2   7 567.303 92.0873  16
   2  -2   7 499.712 84.2175  16
   2   2   8 281.781 17.4531  11
   2  -2   8 276.317 17.5033  11
  -2   2  -8 264.506 83.1472  14
   2  -2   9 56.2025 11.8801  11
   2   2   9 53.4275 11.0479  11
   2  -2  10 470.524 24.4607  11
   2   2  10 467.855 23.9637  11
   2   2  11 257.492 16.9392  11
   2  -2  11 213.383 16.7132  11
   2   2  12 11.9982 8.02365  11
   2  -2  12 15.4300 9.62693  11
   2   2  13 8.91145 6.58864  11
   2  -2  13-7.74461 7.03146  11
  -2   3  15 48.0609 9.29751  11
  -2  -3  15 49.7485 8.68839  11
  -2  -3  15 34.8929 6.93735  12
  -2   3  14 240.018 13.9971  12
  -2   3  14 277.255 18.6055  11
  -2  -3  14 265.281 16.8956  11
  -2  -3  13 438.385 23.3271  11
  -2   3  13 432.856 25.1078  11
  -2   3  13 393.020 20.4240  12
  -2  -3  12 484.355 25.1288  11
  -2   3  12 436.944 26.4146  11
  -2  -3  12 455.805 23.1707  10
  -2   3  11 401.769 24.1812  11
  -2  -3  11 378.099 22.3238  11
  -2  -3  11 416.097 21.4058  10
  -2   3  10 26.8118 11.7095  11
  -2  -3  10 32.6280 11.6643  11
  -2  -3  10 50.0309 10.4446  10
   2   3  -9 370.423 96.0388   5
   2  -3  -9 536.817 101.694   1
  -2   3   9 318.070 86.9203   4
   2   3  -9 341.324 80.5937   1
  -2  -3   8 2269.16 180.355   3
   2   3  -8 2585.81 187.277   5
  -2   3   8 2338.57 190.038   4
   2   3  -8 2146.10 173.554   1
  -2   3   8 2731.39 178.244   3
   2  -3  -8 2332.77 183.097   1
   2   3  -7 5698.44 275.907   5
  -2   3   7 5457.55 290.981   4
  -2   3   7 5873.74 276.439   3
  -2  -3   7 5943.38 293.373   3
   2  -3  -7 5263.42 273.920   1
   2   3  -7 5254.96 273.695   1
  -2  -3   6 931.031 101.798   3
   2   3  -6 954.009 93.3389   5
  -2   3   6 1154.55 106.165   3
  -2  -3   6 940.485 83.5961   4
   2  -3  -6 1134.98 103.144   1
  -2   3   6 1054.24 109.009   4
  -2  -3   5 1002.75 76.5197   4
  -2   3   5 988.704 96.5173   4
  -2   3   5 1082.02 96.2273   3
  -2  -3   5 1027.43 99.4215   3
   2  -3  -5 936.529 67.2558   5
   2   3  -5 958.772 83.2274   5
   2  -3  -5 1010.44 88.2407   1
   2   3  -4 6625.16 253.685   5
  -2   3   4 6630.28 278.089   4
  -2   3   4 6506.22 244.541   2
  -2  -3   4 6292.04 241.033   4
  -2   3   4 6852.96 277.290   3
  -2  -3   4 7227.77 286.116   3
   2  -3  -4 6433.97 221.546   5
   2  -3  -4 6807.26 257.070   1
   2   3  -3 23566.4 686.473  13
  -2  -3   3 23827.0 713.914   4
  -2   3   3 22119.8 749.483   4
  -2   3   3 23045.8 727.778   2
  -2   3   3 24278.7 753.054   3
  -2  -3   3 24087.1 756.124   3
   2   3  -3 24357.0 729.614   5
  -2  -3   3 24264.6 731.708  15
   2  -3  -3 22618.7 717.424   1
   2  -3  -3 23508.2 682.263   5
   2   3  -2 29458.4 839.492  13
  -2   3   2 28037.7 880.664   2
  -2  -3   2 27814.9 851.780   4
   2  -3  -2 29616.1 824.169   5
  -2  -3   2 27565.4 884.353   3
   2  -3  -2 27558.6 845.895   1
  -2  -3   2 28502.5 870.965  15
  -2  -3   2 29092.4 855.624  14
  -2   3   1 23521.7 754.402   2
   2  -3  -1 24130.7 719.556  17
  -2  -3   1 23055.2 732.343  15
  -2  -3   1 22523.4 734.032   3
  -2   3   1 23709.5 737.422  14
   2  -3  -1 24290.1 690.470   1
  -2  -3   1 23836.9 727.003  14
   2   3  -1 24597.0 712.867  13
  -2   3   0 7329.06 298.819   2
  -2   3   0 7460.70 278.013  14
  -2  -3   0 7457.16 275.258  15
   2   3   0 7716.07 260.030  13
  -2  -3   0 7082.50 259.439   3
   2  -3   0 7828.46 260.999  17
   2   3   0 7363.05 240.465  16
  -2  -3   0 7837.70 275.458  14
  -2   3   0 7474.77 228.939  15
   2   3   1 5614.33 207.104  13
  -2   3  -1 5263.36 242.837   2
  -2  -3  -1 5073.92 185.140   3
   2  -3   1 5014.84 206.061  16
   2   3   1 5532.65 194.196  16
  -2  -3  -1 5162.70 218.209  15
   2  -3   1 5409.88 202.856  17
  -2   3  -1 5148.68 217.508  14
   2   3   2 6082.90 237.872  13
  -2  -3  -2 6478.69 260.945  15
   2  -3   2 5944.98 235.649  17
   2   3   2 6452.50 235.033  16
   2  -3   2 6227.56 241.528  16
  -2   3  -2 6236.56 253.401  14
  -2   3  -2 5824.88 199.983   1
  -2   3  -2 6313.72 284.937   2
  -2   3  -3 50.3422 35.3199  14
   2  -3   3 59.9182 37.4645  16
  -2  -3  -3 85.2428 41.7934   1
  -2   3  -3 59.0396 48.2855   2
   2   3   3 41.4505 32.0508  13
   2  -3   3 49.1381 29.9404  17
   2   3   3 113.348 37.6833  16
  -2  -3  -4 28.9216 44.9105   1
  -2   3  -4 33.3967 33.6580  14
   2   3   4 15.7338 29.8218  13
   2   3   4-12.4112 34.9726  16
   2  -3   4 31.8004 34.1037  17
   2  -3   4 1.53554 30.3018  16
  -2   3  -5 2972.90 186.758  14
  -2  -3  -5 2862.74 196.649   1
   2   3   5 2978.58 179.414  16
   2  -3   5 3024.17 175.992  16
   2   3   5 3036.70 167.936  13
  -2   3  -6 482.572 80.5265  14
   2   3   6 526.110 72.0915  13
   2  -3   6 475.960 70.8220  13
   2  -3   6 510.748 77.3758  16
   2   3   6 580.587 84.3871  16
  -2  -3  -6 461.820 88.2483   1
  -2   3  -7 22.9284 44.7189  14
  -2  -3  -7 8.87331 54.2813   1
   2  -3   7 38.4909 40.8239  13
   2   3   7-10.0203 36.1786  13
   2   3   7 12.8683 43.3315  16
   2  -3   7 3.22765 37.4530  16
   2  -3   8 1770.41 59.6135  11
   2   3   9 65.2765 11.5263  11
   2  -3   9 47.2296 12.1943  11
   2   3  10 312.244 19.3858  11
   2  -3  10 337.595 20.5358  11
   2   3  11 77.0084 11.5825  11
   2  -3  11 77.5787 12.5937  11
   2   3  12 3.77255 7.54962  11
   2  -3  12 2.27129 8.84099  11
   2  -3  13-2.43755 6.87512  11
  -2  -4  15 17.3006 6.33357  12
  -2   4  15 39.5402 8.81978  11
  -2  -4  15 42.5787 8.05904  11
  -2   4  14 76.3803 12.9808  11
  -2  -4  14 60.3138 11.0893  11
  -2   4  13 260.524 15.8969  12
  -2   4  13 294.930 21.2592  11
  -2  -4  13 287.606 18.5273  11
  -2   4  12 1051.22 43.2399  11
  -2   4  12 1037.42 39.6996  12
  -2  -4  12 1058.71 41.6201  11
  -2  -4  12 1125.30 40.9013  10
  -2   4  11 272.247 20.5527  11
  -2  -4  11 255.197 18.7736  11
  -2  -4  11 275.605 17.6665  10
  -2   4  10 3858.74 122.931  11
  -2  -4  10 3934.03 121.253  11
  -2  -4  10 4006.72 120.784  10
   2   4  -9 172.357 79.6765   5
   2  -4  -9 243.149 72.3085   1
   2   4  -9 177.791 62.2470   1
  -2   4   9 198.421 68.2390   4
   2   4  -8 1260.47 132.391   1
  -2   4   8 1189.40 139.182   4
   2   4  -8 1526.43 145.882   5
   2  -4  -8 1348.38 140.983   1
  -2  -4   8 1492.88 147.244   3
   2   4  -7 818.462 98.3001   1
  -2  -4   7 683.517 94.7953   3
  -2   4   7 559.251 91.0717   4
   2  -4  -7 830.496 101.839   1
  -2   4   7 713.346 88.2220   3
   2   4  -7 743.773 93.7402   5
  -2   4   6 3754.77 221.004   4
   2   4  -6 4063.63 209.433   5
  -2   4   6 3856.65 211.491   3
  -2  -4   6 4107.08 225.951   3
   2  -4  -6 3728.02 206.930   1
  -2   4   5 1690.04 107.046   2
  -2   4   5 1692.32 125.728   3
   2  -4  -5 1627.26 116.361   1
  -2  -4   5 1815.01 134.266   3
  -2   4   5 1711.25 130.997   4
   2   4  -5 1830.43 119.568   5
  -2  -4   4 3862.16 158.712   4
   2   4  -4 3865.74 181.255   5
  -2   4   4 4019.04 204.243   4
  -2   4   4 4204.39 203.335   3
  -2   4   4 4078.38 183.175   2
   2  -4  -4 4189.01 183.978   1
  -2  -4   4 4272.46 209.162   3
  -2  -4   4 4404.40 191.418  15
   2   4  -3 18753.8 562.393  13
  -2  -4   3 18449.8 564.482   4
  -2   4   3 18876.3 626.804   4
  -2   4   3 18624.5 607.302   2
  -2   4   3 19675.5 627.419   3
   2  -4  -3 18974.8 586.255   1
  -2  -4   3 19340.2 625.835   3
   2   4  -3 18739.4 599.236   5
  -2  -4   3 19368.4 605.028  15
  -2  -4   3 17834.2 572.772  17
  -2  -4   2 60502.7 1767.71  15
  -2   4   2 59206.0 1780.14   2
  -2  -4   2 60548.5 1722.94  17
   2   4  -2 60068.1 1732.55  13
  -2   4   2 60955.5 1791.31   4
   2  -4  -2 59276.5 1732.96   1
  -2  -4   2 61205.8 1782.11   3
  -2  -4   2 61131.5 1738.48  14
  -2   4   1 7696.39 298.290   4
  -2  -4   1 7526.28 281.014  15
  -2  -4   1 7929.68 267.935  14
  -2   4   1 7286.00 297.864   2
   2  -4  -1 7185.33 230.753   1
   2   4  -1 8027.94 259.591  13
  -2  -4   1 7671.42 282.056   3
  -2  -4   1 7809.77 232.089  17
   2  -4  -1 7620.22 269.194  17
   2   4   0 6927.32 248.281  13
  -2   4   0 7437.02 297.055   2
  -2   4   0 7651.53 286.676   4
  -2   4   0 6960.89 264.109  14
  -2  -4   0 6567.24 251.128   3
  -2  -4   0 6851.79 220.163  17
   2  -4   0 7359.65 257.100  17
  -2  -4   0 7086.66 270.768  15
  -2  -4   0 7015.88 259.397  14
  -2   4  -1 3902.72 204.253   2
   2   4   1 3809.41 153.209  16
  -2  -4  -1 3966.38 183.712  15
   2   4   1 3861.52 164.575  13
  -2   4  -1 3853.41 174.996  14
  -2  -4  -1 3845.50 151.024   3
   2  -4   1 3690.30 168.499  16
   2  -4   1 3818.36 166.581  17
   2   4   2 4551.76 197.644  13
   2  -4   2 4913.43 204.600  17
  -2   4  -2 5067.64 249.759   2
   2   4   2 4805.97 194.998  16
   2  -4   2 4637.51 203.586  16
  -2  -4  -2 4727.59 219.545  15
  -2   4  -2 4639.04 210.228  14
  -2  -4  -3 707.325 86.6543   1
  -2   4  -3 547.949 67.7139  14
  -2   4  -3 610.573 89.0101   2
   2   4   3 806.076 73.5656  13
   2  -4   3 636.963 68.7841  17
   2   4   3 777.067 72.2469  16
   2  -4   3 765.843 75.4184  16
  -2  -4  -3 722.236 81.8773  15
   2   4   4 602.852 68.8191  13
  -2  -4  -4 542.714 81.8497   1
  -2   4  -4 729.239 104.284   2
  -2   4  -4 692.715 80.4161  14
   2  -4   4 607.415 75.4158  17
   2   4   4 550.049 68.9447  16
   2  -4   4 824.409 81.7904  16
  -2  -4  -4 755.756 92.1209  15
   2   4   5 1062.26 94.4207  13
  -2  -4  -5 869.794 108.946   1
   2   4   5 1013.86 102.590  16
   2  -4   5 1051.33 100.222  16
   2  -4   5 860.113 97.6948  17
  -2   4  -5 974.928 102.467  14
  -2  -4  -6 1145.23 136.210   1
  -2   4  -6 1156.40 121.468  14
   2   4   6 1241.08 124.419  16
   2  -4   6 1169.00 115.253  16
   2   4   6 1177.32 107.165  13
   2   4   7 432.032 69.7126  13
  -2  -4  -7 372.320 92.7310   1
   2  -4   7 552.386 88.4829  16
   2  -4   8 85.3669 12.3539  11
   2  -4   9 1846.74 62.7917  11
   2  -4  10 481.553 24.7257  11
   2  -4  11 14.3159 10.2038  11
   2  -4  12 7.33495 9.66419  11
   2  -4  13-2.32250 6.94070  11
  -2  -5  15 22.4886 6.26390  12
  -2   5  15 27.3902 8.22336  11
  -2  -5  15 15.4944 6.61882  11
  -2   5  14 69.4872 12.7228  11
  -2  -5  14 66.1339 10.3058  11
  -2   5  13 292.955 21.1060  11
  -2  -5  13 275.253 18.2013  11
  -2   5  12 568.650 29.8835  11
  -2  -5  12 578.170 27.6736  11
  -2  -5  12 575.743 26.5053  10
  -2   5  11 493.360 27.2497  11
  -2  -5  11 499.211 25.0087  11
  -2  -5  11 498.978 24.6339  10
  -2   5  10 89.0865 14.7088  11
  -2  -5  10 108.435 13.0864  11
  -2  -5  10 106.226 12.3289  10
   2   5  -9 74.6096 56.3535   1
  -2   5   9 89.9910 54.5632   4
   2  -5  -9 154.303 68.3265   1
   2   5  -9 54.1463 58.8462   5
   2   5  -8 833.338 110.179   1
   2  -5  -8 881.118 115.613   1
  -2   5   8 675.393 109.494   4
  -2  -5   8 859.606 114.899   3
   2   5  -8 771.606 111.903   5
  -2   5   7 91.4310 57.0930   4
   2  -5  -7 111.796 55.7524   1
   2   5  -7 43.0706 40.4966   1
  -2  -5   7 51.3044 47.5790   3
   2   5  -7 44.9532 48.2156   5
  -2   5   6 1347.51 126.972   4
   2   5  -6 1361.91 119.040   5
   2  -5  -6 1267.54 114.858   1
  -2  -5   6 1396.03 127.525   3
  -2   5   5 1060.02 105.328   4
  -2   5   5 882.762 84.0307   2
   2  -5  -5 1025.52 92.3118   1
  -2  -5   5 982.771 103.137   3
   2   5  -5 988.400 91.1995   5
  -2   5   4 2510.95 157.152   4
   2   5  -4 2577.68 141.519   5
  -2   5   4 2535.34 144.953   2
   2  -5  -4 2548.57 138.493   1
  -2  -5   4 2658.91 162.865   3
  -2  -5   4 2501.50 129.220  17
  -2  -5   4 2742.33 148.071  15
   2   5  -3 305.126 37.7133  13
  -2   5   3 414.626 59.4709   2
  -2  -5   3 302.683 56.6895   3
   2  -5  -3 340.582 27.5599  15
  -2   5   3 391.464 60.5358   4
  -2  -5   3 395.751 41.3323  17
  -2  -5   3 389.650 53.3214  15
   2   5  -3 344.432 52.3480   5
   2  -5  -3 392.928 46.6884   1
   2  -5  -2 26155.5 809.176   1
  -2   5   2 26237.4 868.003   4
  -2   5   2 27042.2 869.807   2
  -2  -5   2 27267.1 804.167  17
   2   5  -2 28155.2 816.465  13
  -2  -5   2 28300.1 807.175  14
  -2  -5   2 26913.2 850.056  15
   2   5  -1 830.112 60.0185  13
  -2   5   1 887.949 86.5053   2
  -2  -5   1 997.472 78.9691  15
  -2   5   1 886.765 83.3581   4
  -2  -5   1 874.562 48.7000  17
   2  -5  -1 828.328 68.4925  17
  -2  -5   1 940.934 63.2030  14
   2  -5  -1 843.698 41.5117   1
  -2  -5   0 1650.04 76.7940  17
  -2  -5   0 1680.04 110.981  15
  -2   5   0 1838.39 130.797   2
  -2  -5   0 1865.75 102.752  14
  -2   5   0 1904.35 122.754   4
   2  -5   0 1747.90 102.650  17
  -2   5   0 1690.69 101.951  14
   2   5   0 1715.62 95.1452  13
   2  -5   1 1314.63 89.7728  17
  -2   5  -1 1223.14 88.6502  14
   2   5   1 1378.21 86.9737  13
   2  -5   1 1301.25 90.8081  16
  -2  -5  -1 1204.69 96.1699  15
  -2   5  -1 1268.74 114.199   2
   2   5   2 2386.72 128.005  13
   2  -5   2 2223.77 129.549  16
   2  -5   2 2275.72 130.985  17
   2   5   2 2218.94 120.447  16
  -2  -5  -2 2360.84 144.520  15
  -2   5  -2 2221.99 160.099   2
  -2   5  -2 2298.85 132.453  14
   2   5   3 9583.19 347.270  13
   2   5   3 9206.16 346.447  16
   2  -5   3 9214.42 352.440  16
   2  -5   3 8897.46 352.268  17
  -2  -5  -3 8975.38 373.581  15
  -2   5  -3 8817.10 352.509  14
  -2   5  -3 9767.14 413.706   2
  -2   5  -4 1643.69 152.995   2
   2  -5   4 1352.52 109.360  16
   2   5   4 1504.80 115.297  16
   2   5   4 1397.28 106.320  13
  -2  -5  -4 1305.98 129.608   1
   2  -5   4 1359.80 115.789  17
  -2   5  -4 1333.72 111.128  14
  -2  -5  -4 1190.29 116.997  15
   2   5   5 5669.38 256.746  13
   2  -5   5 5164.95 274.315  17
   2  -5   5 5267.93 260.909  16
  -2  -5  -5 5560.94 294.926  15
   2   5   5 5441.95 269.229  16
  -2  -5  -5 5644.83 305.085   1
  -2   5  -5 5304.36 266.768  14
  -2  -5  -6 6216.15 345.374  15
   2   5   6 6834.20 304.472  13
   2  -5   6 7394.75 328.964  16
  -2  -5  -6 6310.81 357.487   1
   2  -5   7 1838.36 156.889  16
  -2  -5  -7 1521.00 164.109  15
  -2  -5  -7 1691.54 178.661   1
   2   5   7 1691.77 137.907  13
   2  -5   8 2122.68 69.9016  11
   2  -5   9 1693.64 58.6279  11
   2  -5  10 308.167 20.0031  11
   2  -5  11 56.2703 11.8462  11
   2  -5  12 7.90318 9.25646  11
   2  -5  13 9.22134 6.84951  11
  -2  -6  15 39.2253 6.23228  12
  -2   6  14 108.808 13.0233  11
  -2  -6  14 92.8655 10.4289  11
  -2  -6  13 332.406 19.3266  11
  -2  -6  13 361.420 19.3986  10
  -2   6  13 376.465 22.6090  11
  -2  -6  12 187.588 15.9233  11
  -2  -6  12 174.170 15.3229  10
  -2   6  12 192.229 19.4589  11
  -2   6  11 537.741 28.8013  11
  -2  -6  11 490.632 25.2095  11
  -2  -6  11 528.057 25.1899  10
  -2   6  10 1480.17 55.4058  11
  -2  -6  10 1474.45 52.5505  11
  -2  -6  10 1550.80 52.6270  10
  -2   6   9 3036.43 244.501   4
   2  -6  -9 3114.12 235.284   1
  -2  -6   9 3042.22 92.6711  10
   2   6  -9 3209.29 243.048   5
   2   6  -9 3029.04 222.036   1
  -2   6   9 2827.30 94.7177  11
   2   6  -8 1552.47 149.303   1
   2  -6  -8 1761.67 162.528   1
  -2   6   8 1543.25 161.903   4
   2   6  -8 1713.43 163.332   5
  -2  -6   8 1778.03 168.248   3
  -2   6   7 1041.44 123.669   4
   2   6  -7 1010.87 112.385   1
  -2  -6   7 1155.16 126.301   3
   2   6  -7 881.700 109.435   5
   2  -6  -7 933.535 110.639   1
  -2  -6   6 195.734 60.8072   3
   2  -6  -6 312.081 64.3365   1
  -2   6   6 245.804 64.2325   4
   2   6  -6 265.297 62.9529   5
  -2   6   5 1708.23 140.531   4
  -2   6   5 1973.78 134.060   2
   2  -6  -5 1667.70 124.680   1
  -2  -6   5 1903.16 145.676   3
   2   6  -5 1895.91 131.124   5
  -2  -6   5 1843.84 120.861  17
  -2   6   4 2699.08 167.242   4
   2  -6  -4 2522.48 142.387   1
  -2   6   4 2718.85 159.493   2
  -2  -6   4 2753.06 170.863   3
  -2  -6   4 2517.19 134.341  17
   2   6  -4 2753.30 152.481   5
  -2  -6   4 2794.76 156.051  15
   2   6  -3 857.387 65.6602  13
  -2   6   3 947.361 90.7796   4
   2  -6  -3 852.151 68.0908   1
  -2   6   3 888.044 88.6402   2
   2   6  -3 866.890 63.9156   2
  -2  -6   3 890.926 64.3543  17
  -2  -6   3 924.136 80.2967  15
   2   6  -3 933.026 80.5210   5
  -2  -6   2 1744.14 87.1175  17
  -2   6   2 1802.82 125.776   4
   2  -6  -2 1773.07 89.6283   1
   2   6  -2 1638.58 94.5096  13
  -2   6   2 2052.65 133.784   2
  -2  -6   2 1816.43 115.366  15
  -2  -6   1 3883.12 149.355  17
   2   6  -1 4031.95 165.990  13
  -2   6   1 3757.50 194.718   4
  -2   6   1 4082.08 208.339   2
   2  -6  -1 3780.76 175.805  17
  -2  -6   1 3826.83 155.578  14
  -2  -6   1 3980.81 187.953  15
   2   6   0 1588.65 95.7742  13
  -2   6   0 1530.75 124.160   2
  -2  -6   0 1535.60 79.6597  17
  -2  -6   0 1446.06 106.813  15
  -2  -6   0 1683.41 97.4465  14
   2  -6   0 1493.79 99.5148  17
  -2   6   0 1594.50 116.408   4
  -2   6  -1 8582.07 370.651   2
  -2   6  -1 8644.81 319.817  14
   2  -6   1 8564.00 325.936  17
  -2  -6  -1 8619.46 342.102  15
   2   6   1 8858.75 318.038  13
   2  -6   2 2456.85 143.979  17
   2   6   2 2698.48 142.679  13
   2  -6   2 2561.39 146.339  16
  -2  -6  -2 2695.62 162.021  15
  -2   6  -2 2528.95 141.227  14
  -2   6  -2 2615.89 181.897   2
   2  -6   3 5327.50 245.845  17
  -2   6  -3 5395.22 291.300   2
   2  -6   3 5468.36 243.755  16
   2   6   3 5498.26 236.971  13
  -2   6  -3 4908.72 233.014  14
  -2  -6  -3 5419.27 264.501  15
   2   6   4 2634.56 152.081  13
   2  -6   4 2302.83 150.086  16
  -2   6  -4 2409.36 152.025  14
  -2  -6  -4 2071.38 170.955   1
  -2  -6  -4 2240.90 169.258  15
  -2   6  -4 2147.37 184.093   2
   2  -6   4 2560.39 164.584  17
   2  -6   5 894.158 96.7074  16
   2   6   5 998.399 96.3598  13
  -2   6  -5 985.890 130.613   2
   2  -6   5 714.960 96.9939  17
  -2  -6  -5 802.086 107.345  15
  -2  -6  -5 934.105 122.602   1
   2   6   6 2232.04 154.659  13
  -2  -6  -6 2081.09 191.204   1
   2  -6   6 2026.90 156.802  16
   2  -6   6 2057.13 172.861  17
  -2  -6  -6 2065.78 183.941  15
   2   6   7 2681.70 181.643  13
   2  -6   7 2755.33 86.3597  11
   2  -6   7 2684.12 195.724  16
  -2  -6  -7 2309.75 218.465   1
  -2  -6  -7 2599.92 221.525  15
   2  -6   8 1077.66 40.8039  11
   2  -6   9 203.068 16.7891  11
   2  -6  10 35.4107 11.9134  11
   2  -6  11 2.42833 10.2343  11
   2  -6  12 19.3832 8.92962  11
   2  -6  13 7.56823 6.48004  11
  -2  -7  15 11.7702 5.19970  12
  -2   7  14 62.2482 11.3300  11
  -2  -7  14 52.2234 8.82617  11
  -2   7  13 406.175 23.2700  11
  -2  -7  13 362.259 19.6102  11
  -2  -7  13 378.404 19.6244  10
  -2   7  12 516.422 27.9508  11
  -2  -7  12 465.062 24.0999  11
  -2  -7  12 493.889 23.8224  10
  -2   7  11 736.177 34.1090  11
  -2  -7  11 637.732 29.8277  11
  -2  -7  11 723.397 30.3471  10
  -2   7  10 1833.93 66.7606  11
  -2  -7  10 1945.32 63.9844  10
  -2   7   9 691.520 32.4306  11
  -2  -7   9 763.791 30.1965  10
  -2   7   8 369.943 90.7391   4
   2   7  -8 517.750 89.8637   1
  -2  -7   8 483.708 97.1270   3
   2  -7  -8 477.168 95.5166   1
   2   7  -8 407.573 90.1750   5
  -2   7   7 2447.44 202.430   4
   2  -7  -7 2922.78 202.660   1
  -2  -7   7 2908.51 210.600   3
   2   7  -7 2947.42 203.848   5
   2   7  -6 6998.24 320.643   5
  -2   7   6 6555.77 335.715   4
   2  -7  -6 6679.07 316.520   1
  -2  -7   6 6997.97 342.500   3
  -2   7   5 983.799 109.252   4
   2   7  -5 961.156 95.5672   5
   2  -7  -5 966.113 95.4235   1
  -2   7   5 795.902 93.7068   2
  -2  -7   5 886.050 104.079   3
  -2  -7   5 921.394 86.0359  17
  -2   7   4 1116.86 110.204   4
   2  -7  -4 1102.30 92.1963   1
  -2   7   4 1098.94 103.882   2
   2   7  -4 1128.47 97.0116   5
  -2  -7   4 1208.43 102.119  15
  -2  -7   4 1246.52 91.3070  17
  -2  -7   3 3373.23 153.808  17
  -2   7   3 3711.69 199.153   4
   2  -7  -3 3423.75 160.032   1
   2   7  -3 3451.10 157.632   2
   2   7  -3 3498.42 175.613   5
  -2  -7   3 3386.87 178.662  15
  -2   7   3 3352.89 192.029   2
   2   7  -2 522.565 55.2456  13
  -2  -7   2 533.828 48.3669  17
  -2   7   2 594.181 77.1375   4
  -2   7   2 525.117 76.0666   2
   2  -7  -2 433.169 58.3433  17
  -2  -7   2 583.420 68.1507  15
   2  -7  -2 483.273 47.0077   1
   2   7  -2 582.469 65.8204   5
   2  -7  -1 1007.95 85.3195  17
  -2   7   1 1009.26 93.8585   4
  -2   7   1 952.245 101.862   2
  -2  -7   1 1076.30 68.6363  17
   2   7  -1 1133.10 80.1876  13
  -2  -7   1 986.896 89.4621  15
  -2  -7   1 1087.65 66.4609  14
   2   7   0 2084.97 117.997  13
  -2  -7   0 2031.70 132.365  15
  -2   7   0 1779.19 143.587   2
   2  -7   0 2044.19 126.192  17
  -2  -7   0 2021.90 102.425  17
  -2   7   0 2170.21 138.622   4
  -2  -7   0 2145.25 114.589  14
   2  -7   1 50.9938 32.6979  17
  -2  -7  -1 69.2879 36.7564  15
  -2   7  -1 36.2440 49.2491   2
  -2   7  -1 88.9078 31.1494  14
   2   7   1 78.8134 36.5498  13
  -2   7  -2 5394.49 288.518   2
   2   7   2 5575.91 236.054  13
  -2   7  -2 5012.70 223.326  14
   2  -7   2 5200.92 238.959  16
   2  -7   2 5339.46 242.925  17
  -2  -7  -2 5377.60 258.751  15
   2   7   3 4349.45 210.726  13
  -2  -7  -3 4334.07 238.187  15
   2  -7   3 4498.86 223.978  17
   2  -7   3 4364.82 217.384  16
  -2   7  -3 4473.10 209.071  14
  -2   7  -3 4076.70 259.188   2
   2   7   4 14164.7 514.361  13
  -2   7  -4 14332.6 595.664   2
   2  -7   4 14668.2 540.718  17
   2  -7   4 13788.8 518.159  16
  -2  -7  -4 13921.9 554.741  15
   2   7   5 2260.08 154.505  13
   2  -7   5 2149.31 155.917  16
  -2   7  -5 2178.57 200.307   2
   2  -7   5 2334.88 176.668  17
  -2  -7  -5 2196.90 182.402  15
   2   7   6 3698.14 213.841  13
  -2  -7  -6 3536.17 250.665  15
   2  -7   6 3854.01 247.734  17
  -2  -7  -6 3212.84 252.628   1
   2  -7   6 3635.48 222.283  16
   2   7   7 1735.42 147.158  13
   2  -7   8 70.1421 13.0251  11
   2  -7   9 856.762 35.5554  11
   2  -7  10 234.224 17.6859  11
   2  -7  11 2.85052 10.1527  11
   2  -7  12 145.326 12.0880  11
   2  -7  13 192.842 10.9062  11
  -2   8  13 168.888 16.0973  11
  -2  -8  13 136.272 12.2760  11
  -2  -8  13 165.487 12.9160  10
  -2   8  12 76.8014 16.0693  11
  -2  -8  12 70.7171 12.2135  11
  -2  -8  12 75.3648 11.4488  10
  -2   8  11 2531.83 85.2283  11
  -2  -8  11 2524.19 81.6390  10
  -2   8  10 1746.19 63.3878  11
  -2  -8  10 1770.04 59.9005  10
  -2   8   9 36.7970 12.6521  11
  -2  -8   9 32.4276 9.30978  10
   2   8  -8 1232.31 145.483   5
   2   8  -8 1298.61 139.084   1
   2  -8  -8 1532.37 156.121   1
  -2   8   8 1289.89 155.586   4
  -2  -8   8 1329.38 152.193   3
   2   8  -7 247.736 76.5125   5
  -2   8   7 225.762 72.0075   4
   2  -8  -7 252.425 71.2438   1
  -2  -8   7 242.626 75.5846   3
  -2  -8   6 163.549 49.5192  17
  -2   8   6 151.347 62.3570   4
   2  -8  -6 129.337 51.6115   1
   2   8  -6 73.9577 47.6063   5
  -2  -8   6 198.613 66.9598   3
  -2   8   5 18434.3 691.549   4
   2  -8  -5 18503.1 656.094   1
  -2   8   5 18204.7 678.515   2
  -2  -8   5 18766.0 645.320  17
   2   8  -5 18622.4 660.239   5
   2   8  -4 1936.47 132.682   5
   2  -8  -4 1766.79 123.056   1
  -2   8   4 1824.18 146.434   4
  -2  -8   4 1946.19 120.432  17
  -2   8   4 1754.20 142.104   2
  -2  -8   4 1776.30 130.856  15
   2   8  -3 1978.99 129.367   5
  -2   8   3 1740.72 141.276   2
   2   8  -3 1854.44 115.805   2
  -2   8   3 1954.24 144.386   4
  -2  -8   3 1684.02 105.483  17
  -2  -8   3 1830.18 128.388  15
   2  -8  -3 1817.65 112.483   1
  -2  -8   2 416.695 47.3140  17
   2   8  -2 373.893 52.5463  13
  -2   8   2 401.879 71.9281   2
  -2   8   2 612.413 79.8756   4
  -2  -8   2 430.999 61.9962  15
   2  -8  -2 448.049 62.7991  17
   2   8  -2 359.885 57.3832   5
   2  -8  -1 2956.35 165.441  17
   2   8  -1 3111.25 158.831  13
  -2   8   1 3107.59 179.613   4
  -2   8   1 3425.07 203.954   2
  -2  -8   1 2974.10 171.533  15
  -2  -8   1 3133.37 143.402  17
   2  -8   0 159.746 40.0616  17
   2   8   0 124.720 38.6145  13
  -2  -8   0 135.217 41.7966  15
  -2   8   0 159.903 56.6519   2
  -2  -8   0 152.550 31.3622  17
  -2   8   0 115.171 43.8193   4
  -2  -8   0 152.829 34.4946  14
   2   8   1 19345.4 603.798  13
  -2   8  -1 18296.6 672.421   2
  -2  -8  -1 17176.8 573.675  17
   2  -8   1 16839.7 606.782  17
  -2  -8  -1 17705.9 625.668  15
   2   8   2 7083.61 288.794  13
   2  -8   2 6472.01 288.786  16
   2  -8   2 6882.33 298.236  17
  -2  -8  -2 6982.46 315.425  15
  -2   8  -2 6154.90 334.984   2
   2   8   3 1865.58 130.246  13
   2  -8   3 1715.52 129.158  16
   2  -8   3 1711.83 133.782  17
  -2  -8  -3 1789.85 147.592  15
  -2   8  -3 1837.72 169.656   2
   2   8   4 771.443 88.3702  13
   2  -8   4 695.528 91.1977  17
  -2   8  -4 670.782 114.466   2
  -2  -8  -4 632.145 95.6889  15
   2  -8   4 790.205 90.4602  16
   2   8   5 12.8790 40.9863  13
  -2   8  -5-3.33061 62.0123   2
  -2  -8  -5 25.3134 50.9059  15
   2  -8   5-12.4604 46.8422  17
   2  -8   5 8.93995 39.1464  16
   2   8   6 2107.13 160.022  13
   2  -8   6 1895.46 174.117  17
  -2  -8  -6 2050.18 190.724  15
   2  -8   6 2084.54 163.511  16
   2  -8   8 442.061 23.5555  11
   2  -8   9 2578.78 83.4932  11
   2  -8  10 124.860 14.6653  11
   2  -8  11 67.9544 11.6107  11
   2  -8  12 50.2272 9.10127  11
  -2   9  13 142.916 14.5231  11
  -2  -9  13 151.240 11.9653  10
  -2   9  12 114.861 16.4302  11
  -2  -9  12 123.887 13.1620  10
  -2   9  11 1863.99 65.7188  11
  -2  -9  11 1818.71 62.0445  10
  -2   9  10 715.391 34.1077  11
  -2  -9  10 689.399 29.9827  10
  -2   9   9 507.983 27.4611  11
  -2  -9   9 497.943 23.6952  10
   2   9  -8 874.366 117.389   1
  -2  -9   8 858.895 32.8386  10
   2  -9  -8 719.374 114.971   1
  -2  -9   8 838.545 129.642   3
  -2   9   8 798.924 35.1475  11
   2  -9  -7 2443.65 193.015   1
  -2   9   7 2134.29 197.466   4
   2   9  -7 2472.92 193.925   5
  -2  -9   7 2289.35 199.203   3
   2  -9  -6 1164.46 122.926   1
  -2   9   6 1087.71 131.858   4
  -2   9   6 1029.65 121.762   2
  -2  -9   6 1429.94 148.432   3
   2   9  -6 1127.26 122.638   5
  -2  -9   6 1219.49 116.043  17
  -2   9   5 1180.91 125.598   2
   2  -9  -5 1204.23 114.627   1
  -2  -9   5 1426.26 141.541   3
  -2  -9   5 1263.45 109.262  17
   2   9  -5 1392.05 124.285   5
  -2   9   5 1387.31 138.290   4
   2  -9  -4 1715.89 127.063   1
  -2   9   4 1969.74 155.167   4
  -2   9   4 1908.55 156.129   2
   2   9  -4 1894.81 137.611   5
  -2  -9   4 2115.92 147.195  15
  -2  -9   4 1868.28 125.611  17
   2   9  -3 3627.74 196.629   5
  -2   9   3 3729.93 217.253   4
  -2   9   3 3875.14 229.713   2
   2   9  -3 3622.46 188.313   2
  -2  -9   3 3674.81 178.740  17
   2  -9  -3 3998.87 208.969  17
  -2  -9   3 3877.66 206.802  15
   2   9  -2 271.237 50.5857  13
  -2   9   2 339.995 72.7892   2
  -2   9   2 327.347 63.6074   4
   2  -9  -2 263.767 54.9624  17
  -2  -9   2 340.274 47.1639  17
  -2  -9   2 298.175 58.4174  15
   2   9  -2 325.784 55.9805   5
   2   9  -1 1862.42 127.032  13
  -2   9   1 2000.09 144.592   4
   2  -9  -1 2200.79 144.039  17
  -2   9   1 2217.30 169.494   2
  -2  -9   1 2270.21 122.692  17
  -2  -9   1 2225.70 148.133  15
   2   9   0 7344.16 311.932  13
  -2   9   0 7641.49 369.863   2
  -2  -9   0 8098.53 340.588  15
   2  -9   0 8138.87 333.234  17
  -2   9   0 8155.93 337.881   4
  -2   9  -1 13360.2 544.823   2
   2   9   1 13297.0 474.460  13
   2  -9   1 12991.1 486.404  17
  -2  -9  -1 12367.2 492.962  15
  -2   9  -2 2221.59 187.695   2
   2   9   2 2167.40 142.671  13
   2  -9   2 2119.93 144.802  16
  -2  -9  -2 1987.63 155.026  15
   2  -9   2 1927.57 143.824  17
   2   9   3 877.128 92.2448  13
  -2   9  -3 1011.46 131.245   2
   2  -9   3 798.994 89.8753  16
   2  -9   3 686.917 90.0968  17
  -2  -9  -3 673.224 95.2715  15
   2   9   4 389.602 69.4276  13
  -2   9  -4 381.198 91.4108   2
   2  -9   4 453.283 78.6906  17
  -2  -9  -4 329.642 74.1213  15
   2  -9   4 318.106 64.7569  16
   2   9   5 88.0030 46.8338  13
  -2   9  -5 240.220 87.8124   2
  -2  -9  -5 171.382 63.6863  15
   2  -9   5 94.5976 48.8885  17
   2  -9   5 30.6965 36.6635  16
  -2   9  -6 82.9803 13.2332   7
   2   9   6 85.7594 42.7377  13
   2  -9   6 100.189 57.6543  17
   2  -9   6 33.6627 38.6748  16
  -2   9  -6-4.55982 72.9069   2
  -2  -9  -6 9.75825 52.4469  15
   2  -9   8 295.671 19.4850  11
   2  -9   9 795.609 33.4521  11
   2  -9  10 201.743 16.2676  11
   2  -9  11 88.1151 11.6204  11
   2  -9  12 23.4133 8.27176  11
  -2 -10  14 6.41826 5.41697  12
  -2 -10  13 12.9407 7.22980  10
  -2 -10  12 200.987 14.3450  10
  -2  10  11 2387.73 80.4683  11
  -2 -10  11 2367.69 76.7864  10
  -2 -10  10 295.803 18.4669  10
  -2  10  10 279.857 22.5456  11
  -2  10   9 1803.63 65.9754  11
  -2 -10   9 1906.38 62.8478  10
  -2 -10   8 273.002 16.8684  10
  -2  10   8 311.983 21.0833  11
   2 -10  -7 2143.98 187.354   1
  -2  10   7 2227.32 202.295   4
  -2 -10   7 2464.43 211.582   3
   2  10  -7 2140.51 187.954   5
  -2  10   6 3572.04 248.536   4
   2 -10  -6 3221.27 220.069   1
  -2  10   6 3175.90 229.005   2
  -2 -10   6 3661.71 251.645   3
   2  10  -6 3501.41 228.406   5
  -2  10   5 10130.9 452.812   4
  -2  10   5 9565.90 444.605   2
   2  10  -5 10099.4 422.711   5
   2 -10  -5 9863.65 416.684   1
  -2  10   4 5.71282 39.9849   4
  -2  10   4 27.3847 45.8698   2
  -2 -10   4 48.5982 35.0600  15
   2  10  -4-14.0230 40.7144   5
  -2  10   3 147.909 53.5043   4
  -2  10   3 73.4321 48.2556   2
  -2 -10   3 111.423 39.7170  15
   2  10  -3 65.6345 39.0091   2
   2 -10  -3 64.9748 41.7113  17
   2  10  -3 184.610 50.3900   5
   2  10  -2 559.384 72.8298   5
  -2  10   2 533.737 79.3539   4
   2 -10  -2 544.759 76.4192  17
  -2  10   2 657.063 97.7148   2
  -2 -10   2 624.992 79.7998  15
   2  10  -1 524.861 70.3154  13
  -2  10   1 464.060 88.0918   2
   2  10  -1 431.382 66.0150   5
  -2  10   1 499.998 75.8023   4
  -2 -10   1 476.228 72.0576  15
   2 -10  -1 449.334 71.0427  17
  -2 -10   0 3220.29 199.566  15
  -2  10   0 3429.15 233.211   2
   2 -10   0 3589.78 203.872  17
  -2  10   0 3796.42 205.411   4
   2  10   0 3470.70 192.505  13
   2  10   1 15101.5 550.081  13
  -2  10  -1 15673.6 627.601   2
   2 -10   1 14845.4 560.744  17
  -2 -10  -1 15304.1 574.410  15
   2  10   2-8.13072 32.8620  13
  -2  10  -2 33.0552 53.5022   2
   2 -10   2 51.3557 36.8902  17
  -2 -10  -2 22.7078 36.2120  15
   2 -10   2 64.7371 39.6482  16
   2  10   3 1926.93 149.898  13
   2 -10   3 1793.40 141.913  16
   2 -10   3 1932.07 154.445  17
  -2  10  -3 2358.37 206.121   2
  -2 -10  -3 2009.52 166.274  15
   2 -10   4 309.154 69.5219  17
   2  10   4 313.089 65.7860  13
  -2 -10  -4 263.331 75.5528  15
  -2  10  -4 267.097 88.4991   2
   2 -10   4 204.658 58.4363  16
   2  10   5 2664.03 192.301  13
   2 -10   5 3058.95 199.726  16
   2 -10   5 2891.08 214.463  17
  -2 -10  -5 2813.69 222.169  15
  -2  10  -5 2864.37 247.905   2
  -2  10  -6 1704.31 61.4966   7
   2 -10   8 391.893 22.2493  11
   2 -10   9 84.2216 13.4834  11
   2 -10  10 1.57288 10.5307  11
   2 -10  11 46.4155 9.82074  11
   2 -10  12 24.8850 7.25790  11
  -2 -11  13 231.525 12.9541  10
  -2 -11  12 58.2269 9.77302  10
  -2 -11  11 642.618 27.7249  10
  -2 -11  10 825.151 33.4058  10
  -2  11   9 1015.67 43.3836  11
  -2 -11   9 1089.27 40.4527  10
  -2  11   8 17.1963 13.5802  11
  -2 -11   8 15.3263 8.91816  10
  -2 -11   7 203.395 14.3517  10
  -2  11   6 2516.61 210.926   4
   2  11  -6 2732.36 202.100   5
  -2  11   6 2272.07 199.832   2
  -2 -11   6 2494.84 217.248   3
  -2  11   5 757.103 117.310   2
   2  11  -5 945.928 112.772   5
  -2  11   5 1030.02 128.872   4
   2  11  -4 849.642 99.2485   5
  -2  11   4 763.317 108.050   4
   2 -11  -4 760.230 98.3176  17
  -2 -11   4 913.212 104.953  15
  -2  11   4 811.405 116.522   2
  -2  11   3 1192.95 126.536   4
  -2  11   3 1304.83 142.840   2
   2 -11  -3 1157.91 117.774  17
   2  11  -3 1372.73 118.590   5
  -2 -11   3 1261.72 119.755  15
  -2  11   2 2899.39 188.914   4
  -2  11   2 2601.28 205.830   2
   2 -11  -2 2552.90 174.933  17
   2  11  -2 2663.96 176.493   2
   2  11  -2 2688.56 167.459   5
  -2 -11   2 2682.64 179.618  15
  -2  11   1 2224.37 155.972   4
   2  11  -1 1929.37 143.933  13
  -2  11   1 1600.18 161.507   2
   2 -11  -1 1947.12 148.110  17
  -2 -11   1 1894.94 148.562  15
   2  11  -1 1761.27 132.807   5
  -2  11   0 8301.57 413.017   2
   2 -11   0 8194.57 360.704  17
   2  11   0 7942.02 350.578  13
  -2 -11   0 7780.47 359.436  15
   2  11   1 1596.69 133.768  13
   2 -11   1 1522.45 133.327  17
  -2  11  -1 1453.91 159.375   2
  -2 -11  -1 1331.32 129.742  15
   2  11   2 5678.57 281.751  13
  -2  11  -2 5694.29 340.745   2
   2 -11   2 4929.42 275.562  17
  -2 -11  -2 5394.52 291.732  15
   2 -11   2 5308.56 269.098  16
   2  11   3 618.540 91.6597  13
   2 -11   3 541.637 79.9021  16
  -2 -11  -3 366.377 81.3921  15
  -2  11  -3 456.333 102.133   2
   2 -11   3 382.198 74.6529  17
   2  11   4 1560.03 143.547  13
   2 -11   4 1164.85 132.808  17
  -2  11  -4 1339.12 171.545   2
   2 -11   4 1407.25 131.080  16
  -2 -11  -4 1373.90 149.640  15
  -2  11  -5 773.682 34.4095   7
  -2  11  -5 788.001 141.123   2
   2 -11   5 717.321 94.9145  16
  -2  11  -6 1550.81 57.8620   7
   2 -11   8 2198.19 72.5699  11
   2 -11   9 37.7622 11.7277  11
   2 -11  10 39.8520 10.9618  11
   2 -11  11 52.3306 9.42498  11
   2 -11  12 64.9968 7.34006  11
  -2 -12  13 23.4224 6.24010  10
  -2 -12  12 535.621 22.6230  10
  -2 -12  11 916.862 34.8257  10
  -2 -12  10 46.0092 10.9542  10
  -2 -12   9 1837.72 62.2191  10
  -2 -12   8 427.962 21.8815  10
  -2 -12   7 1958.46 64.9165  10
  -2  12   6 670.423 116.852   4
  -2 -12   6 550.916 107.946   3
   2  12  -6 567.655 99.7032   5
  -2  12   5 2751.20 217.484   4
  -2  12   5 2372.55 210.477   2
   2  12  -5 2467.42 189.182   5
   2 -12  -5 2393.49 192.691  17
  -2  12   4 151.277 63.4345   4
  -2  12   4 196.962 72.3541   2
   2 -12  -4 148.610 54.0589  17
  -2 -12   4 189.812 57.7285  15
   2  12  -4 191.697 59.3803   5
  -2  12   3 201.377 65.7262   4
   2 -12  -3 333.796 70.5896  17
  -2  12   3 278.825 80.3547   2
  -2 -12   3 279.122 66.8173  15
   2  12  -3 266.869 62.5761   5
   2  12  -2 231.376 60.8455   2
  -2  12   2 269.612 79.6713   2
   2 -12  -2 190.845 58.4062  17
  -2 -12   2 184.719 55.8917  15
   2  12  -2 269.517 60.8819   5
   2 -12  -1 210.085 56.1062  17
  -2  12   1 163.018 66.7524   2
   2  12  -1 206.370 55.1494   5
  -2 -12   1 141.734 52.1745  15
   2  12   0 2303.08 172.052  13
   2 -12   0 2394.46 178.334  17
  -2  12   0 2703.13 222.307   2
   2  12   0 2382.28 160.743   5
  -2 -12   0 2362.69 177.967  15
   2  12   1 3425.60 217.354  13
   2 -12   1 3507.69 220.813  17
  -2  12  -1 3109.30 251.487   2
  -2 -12  -1 3356.88 221.468  15
  -2  12  -2 405.425 103.557   2
   2  12   2 344.426 75.2709  13
   2 -12   2 376.886 74.9336  17
   2 -12   2 359.484 67.8509  16
  -2 -12  -2 366.239 75.6545  15
   2  12   3 282.345 75.6617  13
  -2  12  -3 252.369 90.9411   2
  -2 -12  -3 327.520 80.3849  15
   2 -12   3 289.896 66.7755  17
   2 -12   3 307.113 69.2708  16
   2  12   4 151.528 56.8163  13
  -2  12  -4 235.544 18.2854   7
  -2  12  -4 290.117 92.9697   2
   2 -12   4 324.823 77.5873  17
   2 -12   4 361.783 72.0606  16
  -2 -12  -4 308.542 74.2816  15
  -2  12  -5 566.771 29.0821   7
  -2  12  -6 146.390 17.5011   7
   2 -12   8 209.533 16.6782  11
   2 -12   9 15.8870 10.7008  11
   2 -12  10 57.2375 10.3808  11
   2 -12  11 125.063 10.4768  11
  -2 -13  13 96.7402 7.55330  10
  -2  13  13 113.408 9.72292   6
  -2 -13  12 137.582 10.5716  10
  -2 -13  11 13.6057 8.75608  10
  -2 -13  10 165.405 13.8431  10
  -2 -13   9 903.658 35.5258  10
  -2 -13   8 272.275 17.5323  10
  -2 -13   7 120.174 12.5197  10
  -2  13   5 1082.68 145.205   4
  -2  13   5 1104.52 43.2135   6
  -2 -13   5 1058.07 37.3251   9
   2 -13  -5 1169.04 134.669  17
   2  13  -5 1147.81 129.851   5
  -2  13   5 952.275 141.487   2
   2 -13  -4 1263.15 137.482  17
  -2  13   4 1048.42 144.946   2
   2  13  -4 1359.29 135.648   5
  -2 -13   4 1341.72 136.323  15
  -2  13   3 594.715 116.594   2
   2 -13  -3 707.447 101.960  17
  -2 -13   3 716.836 98.4685  15
   2  13  -3 770.882 99.8734   5
   2 -13  -2 1378.15 139.472  17
  -2  13   2 1710.71 180.479   2
   2  13  -2 1707.68 139.353   5
   2  13  -2 1511.89 149.015   2
  -2 -13   2 1412.14 137.880  15
  -2  13   1 1720.82 183.537   2
   2  13  -1 1504.14 150.481   2
   2 -13  -1 1687.55 153.490  17
   2  13  -1 1921.09 143.992   5
  -2 -13   1 1746.20 154.971  15
   2  13   0 2259.12 178.294  13
  -2  13   0 2047.75 208.087   2
   2 -13   0 2383.47 184.102  17
   2  13   0 2249.51 159.435   5
  -2 -13   0 2232.93 176.382  15
   2  13   1 3250.87 222.529  13
  -2  13  -1 3338.60 268.465   2
   2 -13   1 3113.23 204.591  16
  -2 -13  -1 3219.34 222.891  15
   2 -13   1 3357.03 225.094  17
  -2 -13  -2 531.565 94.0108  15
   2  13   2 443.588 88.2066  13
   2 -13   2 537.294 85.9072  16
  -2  13  -2 549.856 121.152   2
   2 -13   2 451.998 85.8035  17
   2  13   3 591.833 99.0995  13
  -2  13  -3 546.507 27.9774   7
  -2  13  -3 567.205 120.983   2
  -2 -13  -3 621.889 103.230  15
   2 -13   3 720.461 104.711  17
   2 -13   3 545.838 87.8238  16
  -2  13  -4 1140.51 45.4849   7
  -2  13  -5 895.628 39.2959   7
  -2  13  -6 381.622 24.8601   7
   2 -13   8 451.562 22.9695  11
   2 -13   9 23.5903 10.3757  11
   2 -13  10 14.1810 8.43069  11
   2 -13  11 130.622 9.52959  11
  -2  14  12 179.785 13.4542   6
  -2 -14  12 191.241 11.1670  10
  -2 -14  11 118.840 11.0522  10
  -2  14  11 121.116 14.1395   6
  -2 -14  10 412.916 20.5763  10
  -2 -14   9 121.694 12.5165  10
  -2 -14   8 195.457 15.0586  10
  -2 -14   7 157.463 14.1288  10
  -2  14   7 168.967 17.4863   6
  -2  14   6 282.823 21.1190   6
  -2  14   5 1172.97 46.8018   6
  -2  14   4 1093.04 43.3845   6
  -2 -14   4 1051.43 37.0733   9
   2  14  -4 1038.61 125.606   5
  -2  14   3 485.934 25.7241   6
   2 -14  -3 391.367 85.2161  17
  -2  14   3 546.215 112.346   2
  -2 -14   3 661.082 96.2823  15
   2  14  -3 505.862 91.8231   5
  -2  14   2 880.890 140.036   2
   2 -14  -2 866.984 114.826  17
  -2 -14   2 920.570 113.171  15
   2  14  -2 877.826 106.203   5
  -2  14   1 1323.24 170.673   2
  -2 -14   1 1060.76 124.651  15
   2 -14  -1 1128.82 129.233  17
   2  14  -1 1093.16 135.359   2
  -2  14   0 3300.94 271.312   2
   2  14   0 3224.30 237.336   2
   2 -14   0 3171.18 225.138  17
  -2 -14   0 3206.48 223.733  15
   2  14   1 1130.56 133.207  13
  -2  14  -1 862.299 37.2615   7
  -2  14  -1 933.180 38.3049   6
  -2  14  -1 1233.15 168.926   2
   2 -14   1 714.961 106.169  17
   2 -14   1 917.530 109.191  16
  -2 -14  -1 1022.04 126.198  15
  -2  14  -2 61.0671 12.3042   7
  -2  14  -2 54.2477 12.4616   6
  -2  14  -3 441.730 24.9061   7
  -2  14  -4 105.428 15.0617   7
  -2  14  -5 151.467 17.0649   7
  -2  14  -6 850.409 38.5738   7
   2 -14   8 84.6167 12.0971  11
   2 -14   9 102.868 11.3775  11
   2  14   9 88.0362 10.6121   6
   2 -14  10 31.8805 8.11878  11
  -2  15  12 258.149 14.4414   6
  -2 -15  12 261.641 12.1386  10
  -2  15  11 312.929 18.6748   6
  -2 -15  11 324.357 15.4346  10
  -2  15  10 306.742 20.2543   6
  -2 -15  10 264.271 15.6113  10
  -2  15   9 212.019 18.8180   6
  -2 -15   9 198.986 14.2641  10
  -2  15   8 67.7311 14.5371   6
  -2 -15   8 51.2941 10.4536  10
  -2  15   7 743.177 35.0066   6
  -2 -15   7 710.703 30.4003  10
  -2  15   6 232.479 19.5836   6
  -2  15   5 1703.50 62.6138   6
  -2  15   4 490.823 27.2327   6
  -2 -15   4 511.108 21.7227   9
  -2  15   3 1783.24 65.7266   6
  -2 -15   3 1889.39 59.4846   9
  -2  15   2 1546.48 57.3823   6
  -2 -15   2 1555.35 50.7096   9
  -2  15   1 3992.50 126.282   6
  -2 -15   1 4049.89 119.471   9
  -2  15   1 3903.81 125.414   7
  -2  15   0 717.488 32.9894   7
  -2  15   0 705.362 33.5469   6
  -2 -15   0 748.583 27.8967   9
  -2  15  -1 816.382 36.0537   7
  -2  15  -1 828.408 36.5600   6
  -2 -15  -1 794.846 29.8147   9
  -2  15  -2 184.430 17.5947   7
  -2  15  -2 213.503 18.4821   6
  -2  15  -3 298.939 21.1471   7
  -2  15  -4 660.756 32.8979   7
  -2  15  -5 402.494 25.5639   7
  -2  15  -6 41.9605 14.1804   7
   2 -15   7 646.422 27.5827  11
   2 -15   8 33.2867 9.95940  11
   2 -15   9 165.048 11.8997  11
   2 -15  10 12.3673 6.41577  11
  -2 -16  11 108.173 8.36337  10
  -2  16  11 86.2296 10.6412   6
  -2 -16  10 84.1457 9.48495  10
  -2  16  10 62.2831 11.9849   6
  -2  16   9 17.0439 11.7794   6
  -2 -16   9 3.29970 8.25315  10
  -2  16   8 277.485 20.8676   6
  -2 -16   8 275.738 16.6622  10
  -2 -16   7 183.592 14.3649  10
  -2  16   7 177.529 18.5523   6
  -2  16   6 86.7612 15.6122   6
  -2  16   5 599.622 30.7720   6
  -2  16   4 659.649 32.6056   6
  -2 -16   4 630.553 25.5101   9
  -2  16   3 638.016 31.1777   6
  -2 -16   3 581.777 24.0642   9
  -2  16   2 119.423 16.2971   6
  -2 -16   2 134.509 10.8237   9
  -2  16   1 262.482 20.0675   7
  -2  16   1 292.529 20.9858   6
  -2 -16   1 258.954 14.5078   9
  -2  16   0 1205.18 47.7234   7
  -2  16   0 1198.23 48.5866   6
  -2 -16   0 1249.48 41.8129   9
  -2  16  -1 684.093 32.9747   7
  -2  16  -1 724.658 34.0717   6
  -2  16  -2 50.7916 13.8965   7
  -2  16  -2 33.2627 12.7695   6
  -2  16  -3 683.402 33.2609   7
  -2  16  -4 469.949 27.0485   7
  -2  16  -5 18.5229 13.2925   7
  -2  16  -6 255.739 20.4158   7
   2 -16   7 29.9603 10.0440  11
   2 -16   8 56.9249 9.25129  11
   2 -16   9 69.8170 8.35638  11
  -2  17  11 57.9489 8.34847   6
  -2 -17  11 54.2588 5.95281  10
  -2  17  10 9.27400 9.42685   6
  -2 -17  10 1.71796 6.29450  10
  -2 -17   9 143.985 11.2793  10
  -2  17   9 138.257 14.6724   6
  -2  17   8 22.6698 12.4256   6
  -2 -17   8 15.4793 8.32256  10
  -2  17   7 1291.32 50.3833   6
  -2 -17   7 1274.67 45.4284  10
  -2  17   6 1566.51 58.9009   6
  -2 -17   6 1558.78 53.7575  10
  -2  17   5 1836.29 66.7314   6
  -2  17   4 687.494 33.7095   6
  -2  17   3 164.543 18.0569   6
  -2 -17   3 132.693 11.0637   9
  -2  17   2 224.574 19.6092   7
  -2  17   2 234.299 20.6887   6
  -2 -17   2 240.147 13.7414   9
  -2  17   1 132.259 16.6539   7
  -2  17   1 145.837 17.4527   6
  -2 -17   1 146.191 11.0763   9
  -2  17   0 657.672 32.1228   7
  -2  17   0 631.179 32.2561   6
  -2  17  -1 646.269 31.7242   7
  -2  17  -1 635.632 32.2175   6
  -2  17  -2 464.228 26.3250   7
  -2  17  -2 400.589 26.0168   6
  -2  17  -3 782.487 36.1736   7
  -2  17  -4 45.4971 13.6627   7
  -2  17  -5 46.9087 13.7857   7
  -2  17  -6 239.260 18.8267   7
   2 -17   7 9.36097 7.94680  11
   2 -17   8-5.70325 7.23883  11
   2 -17   9 60.0154 6.84429  11
  -2  18  10 166.751 12.2841   6
  -2 -18  10 149.214 9.15520  10
  -2  18   9 3.91360 9.28684   6
  -2 -18   9 3.39292 6.32522  10
  -2  18   8 357.899 21.8702   6
  -2 -18   8 359.417 17.3801  10
  -2  18   7 86.8820 14.7261   6
  -2 -18   7 77.9419 10.2533  10
  -2  18   6 337.681 22.8794   6
  -2 -18   6 307.816 17.6473  10
  -2  18   5 376.927 24.6175   6
  -2  18   4 1734.12 63.8128   6
  -2  18   3 1357.22 53.4947   6
  -2  18   2 95.5761 16.1212   7
  -2  18   2 104.274 16.7753   6
  -2 -18   2 121.436 10.4209   9
  -2  18   1 875.929 38.9305   7
  -2  18   1 895.324 40.0850   6
  -2  18   0 689.204 33.4267   7
  -2  18   0 695.620 34.1579   6
  -2  18  -1 2389.04 80.6914   7
  -2  18  -1 2291.47 80.8561   6
  -2  18  -2 1353.58 52.3369   7
  -2  18  -3 344.816 23.2076   7
  -2  18  -4 105.921 15.4713   7
  -2  18  -5 275.565 19.8739   7
  -2  18  -6 141.472 14.8546   7
   2 -18   6 129.771 11.3819  11
   2 -18   7 152.698 10.6989  11
   2 -18   8 65.5692 7.29564  11
  -2  19  10 33.1317 6.90950   6
  -2  19   9 51.1935 9.31572   6
  -2 -19   9 61.6890 6.65515  10
  -2  19   8 34.7205 10.9544   6
  -2 -19   8 36.1675 7.15169  10
  -2 -19   7 132.815 10.9344  10
  -2  19   7 135.967 15.0185   6
  -2  19   6 82.3558 14.2881   6
  -2 -19   6 62.4636 9.52384  10
  -2  19   5 376.672 23.5916   6
  -2  19   4 338.573 23.3519   6
  -2  19   3 151.250 17.8354   7
  -2  19   3 160.444 17.8923   6
  -2  19   2 354.483 23.7297   7
  -2  19   2 367.101 24.2450   6
  -2  19   1 487.087 27.0157   7
  -2  19   1 480.170 27.8895   6
  -2  19   0 431.385 25.9455   7
  -2  19   0 449.692 26.9066   6
  -2  19  -1 50.3611 13.8314   7
  -2  19  -1 48.7331 14.4299   6
  -2  19  -2 435.197 25.6464   7
  -2  19  -3 124.442 15.7332   7
  -2  19  -4 74.1630 13.6505   7
  -2  19  -5 20.8221 11.2321   7
   2 -19   6 35.4104 7.30141  11
   2 -19   7 195.986 10.4768  11
  -2  20   9 9.56736 6.19198   7
  -2  20   9 11.0351 6.74391   6
  -2  20   8 164.622 12.9872   6
  -2 -20   8 147.622 9.25262  10
  -2  20   7 70.2848 11.7738   6
  -2 -20   7 71.9923 8.16750  10
  -2  20   6 73.0767 12.9250   6
  -2 -20   6 71.4164 8.95825  10
  -2  20   5 29.2127 11.4831   7
  -2  20   5 48.1336 12.7657   6
  -2 -20   5 41.3757 8.55859  10
  -2  20   4 734.513 33.6068   7
  -2  20   4 798.499 35.1534   6
  -2  20   3 631.406 30.4552   7
  -2  20   3 598.247 30.2738   6
  -2  20   2 211.943 18.4074   7
  -2  20   2 210.643 19.1770   6
  -2  20   1 126.085 15.5454   7
  -2  20   1 112.554 15.6842   6
  -2  20   0 72.7435 14.5112   7
  -2  20   0 61.3889 14.7487   6
  -2  20  -1 285.083 20.5081   7
  -2  20  -2 290.379 20.7066   7
  -2  20  -3 508.502 26.1925   7
  -2  20  -4 119.478 14.0376   7
  -2  20  -5 138.021 13.4700   7
   2 -20   5 178.867 10.4630  11
   2 -20   6 34.5505 6.08701  11
  -2  21   8 84.5874 8.40965   7
  -2  21   8 101.538 9.25671   6
  -2  21   7 0.40754 7.56478   7
  -2  21   7 2.79897 8.07311   6
  -2 -21   7 2.46074 4.80645  10
  -2  21   6 24.6140 9.49281   7
  -2  21   6 26.5001 10.1944   6
  -2 -21   6 23.3709 6.05907  10
  -2  21   5 21.5294 10.1525   7
  -2  21   5-2.70275 10.3255   6
  -2 -21   5 6.29812 6.52968  10
  -2  21   4 5.13992 10.6734   7
  -2  21   4 5.74190 10.5944   6
  -2  21   3 157.442 15.6165   7
  -2  21   3 166.239 16.1062   6
  -2  21   2 285.715 20.0550   7
  -2  21   2 261.265 19.8867   6
  -2  21   1 268.110 19.3601   7
  -2  21   1 286.876 20.3293   6
  -2  21   0 306.840 20.1959   7
  -2  21   0 298.229 20.2161   6
  -2  21  -1 185.779 16.0078   7
  -2  21  -2 148.300 14.8831   7
  -2  21  -3 49.4538 11.2366   7
  -2  21  -4 458.779 21.8483   7
  -2  22   7 35.2633 6.56575   7
  -2  22   7 48.8426 7.36401   6
  -2  22   6 4.74594 7.21605   7
  -2  22   6-3.91083 7.37618   6
  -2 -22   6 6.13007 4.42449  10
  -2  22   5 111.777 11.2302   7
  -2  22   5 100.405 11.1013   6
  -2 -22   5 99.8650 7.87772  10
  -2  22   4 41.6464 9.77843   7
  -2  22   4 35.6619 10.1336   6
  -2 -22   4 34.3683 6.79310  10
  -2  22   3 123.929 13.2988   7
  -2  22   3 127.631 13.7277   6
  -2  22   2 15.2681 10.4747   7
  -2  22   2 6.77927 10.5286   6
  -2  22   1 7.09224 10.7195   7
  -2  22   1 3.44189 10.4878   6
  -2  22   0 32.2155 10.2889   7
  -2  22  -1 71.4557 11.2236   7
  -2  22  -2 94.3245 11.6525   7
  -2  22  -3 204.847 13.9228   7
  -2  22  -4 245.199 13.9633   7
  -2  23   5 89.1532 8.71714   7
  -2  23   5 90.6164 9.04687   6
  -2  23   4 83.2378 9.55986   7
  -2  23   4 92.6121 9.90982   6
  -2 -23   4 86.8343 6.59120  10
  -2  23   3 169.734 12.8219   7
  -2  23   3 191.514 13.3793   6
  -2 -23   3 163.095 9.38997  10
  -2  23   2 119.288 11.7373   6
  -2  23   2 98.4968 10.9888   7
  -2  23   1 47.2790 9.44131   7
  -2  23   0 158.478 12.6332   7
  -2  23  -1 6.63163 7.94668   7
  -2  23  -2 638.495 25.1703   7
  -2  23  -3 2.52266 6.20505   7
  -2  24   2 157.250 10.6820   7
  -2  24   1 686.920 25.5664   7
  -2  24   0 220.723 12.2546   7
  -3   0  15 9.49369 6.58560  12
  -3   0  15 14.9455 8.47545  11
  -3   0  14 23.3550 8.28737  12
  -3   0  14 24.7213 11.0481  11
  -3   0  13 111.131 15.0161  11
  -3   0  13 80.6016 11.8131  12
  -3   0  12 1067.40 42.7554  11
  -3   0  11 76.6267 13.8850  11
  -3   0  11 73.4510 10.4958  10
  -3   0  10 489.624 24.7160  11
  -3   0  10 479.624 22.2060  10
  -3   0   9 221.666 76.5547   3
  -3   0   9 181.983 73.5541   4
   3   0  -9 82.5600 58.7982   1
  -3   0   8 92.7402 51.7092   4
   3   0  -8 9.06141 44.9130   1
  -3   0   8 41.9658 52.2663   3
  -3   0   7 8.66708 40.4190   3
  -3   0   7-6.33958 41.3702   4
   3   0  -7 40.1092 41.9464   1
   3   0  -7 16.6154 38.8450   5
  -3   0   6 319.170 67.3492   4
   3   0  -6 400.559 69.1866   1
  -3   0   6 444.491 79.4337   3
   3   0  -6 412.707 57.0507   5
   3   0  -5 39447.8 1185.64   5
  -3   0   5 38526.4 1255.73   3
  -3   0   5 40549.3 1242.48   4
  -3   0   4 21096.0 723.346   4
  -3   0   4 22277.2 744.598   3
   3   0  -4 22001.8 677.795   5
   3   0  -3 27.5624 16.4575  13
  -3   0   3 59.1392 38.4359   4
  -3   0   3 29.8565 38.3521   3
  -3   0   3 57.3378 20.3095  15
  -3   0   2 332.070 57.7406   4
  -3   0   2 273.636 52.7041   3
  -3   0   2 363.672 37.7505  15
  -3   0   2 345.908 51.2116  14
  -3   0   1 1020.92 90.0993   4
  -3   0   1 997.648 81.7915   3
  -3   0   1 953.763 63.2181  15
  -3   0   1 941.097 83.9765  14
   3   0  -1 965.320 61.9422  16
  -3   0   0 53.2642 28.9040   3
   3   0   0 62.1975 25.0589  16
  -3   0   0 67.4654 25.5264  15
  -3   0   0 110.433 38.7759  14
  -3   0  -1 30.3216 26.6256  15
  -3   0  -1 15.0377 35.7015  14
   3   0   1 9.61113 23.7305  16
   3   0   2 3936.93 192.951  13
  -3   0  -2 3891.77 214.241  14
   3   0   2 4200.58 186.515  16
  -3   0  -2 3985.45 197.210  15
  -3   0  -3 92.7880 50.5736  14
   3   0   3 199.807 46.0634  16
   3   0   3 192.275 50.3071  13
   3   0   4 1441.11 115.456  16
   3   0   4 1231.35 111.629  13
  -3   0  -4 1140.05 125.090  14
  -3   0  -5 298.546 74.7610  14
   3   0   5 268.907 59.1460  13
   3   0   5 283.689 63.4424  16
  -3   0  -6 366.513 88.1894  14
   3   0   6 249.073 69.4037  16
   3   0   6 318.267 67.5739  13
   3   0   9 50.7795 10.8626  11
   3   0  10-1.37317 9.39215  11
  -3   1  15 6.79956 5.89886  12
  -3  -1  15 4.01316 6.34714  12
  -3   1  15 2.60622 8.03308  11
  -3  -1  15 9.85892 8.19795  11
  -3  -1  14 29.3221 9.04741  12
  -3   1  14 23.7845 11.2792  11
  -3  -1  14 37.1132 10.9898  11
  -3   1  14 11.5568 7.72924  12
  -3   1  13 32.4175 10.2005  12
  -3   1  13 31.2266 12.4563  11
  -3  -1  13 29.4602 12.0309  11
  -3   1  12 91.8895 14.7829  11
  -3  -1  12 82.9934 14.3379  11
  -3   1  11 711.668 32.7716  11
  -3  -1  11 719.817 32.6528  11
  -3  -1  11 777.818 30.7322  10
  -3   1  10 251.033 18.5712  11
  -3  -1  10 259.259 17.9688  11
  -3   1  10 259.870 15.4958  10
  -3  -1  10 280.925 16.0877  10
   3   1  -9 95.2537 56.1144   1
   3  -1  -9 150.258 64.9067   1
  -3   1   9 29.8412 60.0469   4
  -3   1   9 15.0448 53.6483   3
  -3  -1   9 166.676 70.1404   3
   3  -1  -8 452.788 81.8552   1
  -3   1   8 413.383 82.1261   3
  -3  -1   8 283.454 69.7292   4
  -3   1   8 218.201 70.8739   4
   3   1  -8 376.624 78.8240   1
  -3  -1   8 465.453 88.7216   3
   3   1  -8 301.776 69.2224   5
   3   1  -7 2042.87 156.835   1
  -3  -1   7 2125.25 160.357   4
  -3   1   7 2235.49 171.349   4
  -3   1   7 1996.39 164.512   3
  -3  -1   7 2196.27 173.596   3
   3   1  -7 2106.57 143.750   5
   3  -1  -7 2096.52 156.670   1
  -3  -1   6 6663.36 301.492   4
  -3   1   6 6627.29 315.162   4
   3  -1  -6 6244.95 259.142   5
   3   1  -6 6511.17 294.587   1
  -3   1   6 7178.88 327.262   3
  -3  -1   6 6626.19 322.463   3
   3   1  -6 6282.19 270.479   5
   3  -1  -6 6927.71 298.037   1
  -3  -1   5 2892.87 168.055   4
   3  -1  -5 2713.35 158.220   1
  -3   1   5 2875.49 179.202   4
  -3   1   5 2891.65 184.226   3
   3  -1  -5 2924.99 137.459   5
   3   1  -5 2696.15 144.484   5
  -3  -1   4 1582.23 113.986   4
  -3   1   4 1413.58 117.152   4
  -3   1   4 1629.07 126.793   3
  -3  -1   4 1501.70 125.079   3
   3  -1  -4 1493.79 85.0288   5
   3   1  -4 1501.47 94.6214   5
  -3  -1   3 5685.25 243.829   4
  -3   1   3 5690.85 257.016   4
   3   1  -3 5723.32 193.773  13
  -3  -1   3 5378.68 214.901  15
  -3   1   3 5681.86 256.491   3
  -3  -1   3 6491.68 271.821   3
  -3   1   3 5724.79 228.598   2
  -3   1   2 8896.61 356.584   4
   3   1  -2 9694.71 309.645  13
  -3   1   2 8969.80 349.243   3
  -3  -1   2 9186.35 353.957   3
   3   1  -2 9279.08 291.910  16
   3  -1  -2 9192.93 291.945  17
  -3  -1   2 9331.17 342.752  14
  -3   1   2 9227.23 294.497  15
  -3  -1   2 8997.80 315.330  15
  -3   1   2 9381.08 347.623   2
  -3   1   2 9429.31 346.915  14
  -3  -1   2 9051.13 346.742   4
   3   1  -1 3075.19 140.526  13
  -3  -1   1 2910.01 158.754  14
  -3   1   1 3248.85 176.781   2
  -3   1   1 3199.56 158.139   3
  -3  -1   1 3180.88 157.040   3
   3  -1  -1 3206.20 137.505  16
   3  -1  -1 3120.73 115.755  17
  -3   1   1 3137.30 165.910  14
   3   1  -1 3282.66 125.896  16
  -3   1   1 2911.06 122.083  15
  -3  -1   1 3086.32 140.414  15
  -3   1   1 3552.45 180.313   4
   3   1   0 2289.78 123.294  13
  -3   1   0 2297.84 122.935   3
  -3  -1   0 2363.67 121.006   3
  -3   1   0 2327.93 142.668  14
   3  -1   0 2358.04 118.216  16
   3  -1   0 2353.72 100.086  17
   3   1   0 2408.20 110.813  16
  -3   1   0 2428.33 160.273   2
  -3  -1   0 2388.46 124.796  15
  -3   1   0 2479.94 112.372  15
  -3  -1   0 2355.92 142.269  14
   3   1   1 7943.84 304.473  13
  -3  -1  -1 8225.35 308.285  15
   3  -1   1 7955.21 275.073  17
   3  -1   1 8109.41 294.278  16
   3   1   1 7573.19 282.594  16
  -3   1  -1 7808.55 290.820  15
  -3  -1  -1 7904.53 328.110  14
  -3   1  -1 7856.25 327.347  14
   3  -1   2 3252.17 153.654  17
   3   1   2 3112.02 167.925  13
   3   1   2 3284.50 160.520  16
   3  -1   2 3417.21 166.677  16
  -3  -1  -2 3335.21 179.523  15
  -3   1  -2 3443.10 172.303  15
  -3  -1  -2 3455.88 197.465  14
  -3   1  -2 3158.70 189.417  14
   3   1   3 7085.25 298.983  13
   3  -1   3 6878.02 290.536  16
  -3   1  -3 6422.34 318.958  14
   3   1   3 7201.65 292.086  16
  -3  -1  -3 7571.66 322.311  15
  -3  -1  -3 7220.55 334.814  14
  -3   1  -4 838.219 107.456  14
  -3  -1  -4 941.349 114.284  14
   3   1   4 841.752 91.7083  13
   3  -1   4 1103.94 102.689  13
   3  -1   4 867.715 90.6180  16
   3   1   4 996.663 95.4694  16
  -3   1  -5 86.1556 55.5697  14
  -3  -1  -5 102.663 61.4543  14
   3   1   5 54.1523 41.6967  13
   3  -1   5 55.3045 39.9751  13
   3  -1   5 65.7764 41.4073  16
   3   1   5 47.4619 40.2442  16
   3  -1   6 2189.21 163.558  13
  -3  -1  -6 2016.00 191.481  14
   3   1   6 2226.62 175.505  16
   3  -1   6 2275.40 176.137  16
   3   1   6 2394.52 167.884  13
  -3   1  -6 1897.55 184.085  14
   3  -1   7 51.1909 9.85212  11
   3  -1   8 128.688 13.1227  11
   3  -1   9 236.295 16.8953  11
   3  -1  10 13.4849 9.44173  11
   3  -1  11 61.8105 9.45206  11
  -3   2  15 36.9533 6.66139  12
  -3   2  15 12.3189 8.49870  11
  -3  -2  15 24.9177 8.21261  11
  -3  -2  15 11.7843 6.72165  12
  -3   2  14 166.938 12.5198  12
  -3  -2  14 162.879 12.9612  12
  -3   2  14 174.069 15.3827  11
  -3  -2  14 176.596 14.6423  11
  -3   2  13 11.5495 8.47049  12
  -3   2  13-1.80325 12.8259  11
  -3  -2  13 19.3279 11.4180  11
  -3   2  12 704.041 29.6381  12
  -3   2  12 691.687 31.9309  11
  -3  -2  12 650.555 30.5616  11
  -3  -2  12 628.630 28.3833  10
  -3   2  11 269.991 19.9791  11
  -3  -2  11 307.978 19.9111  11
  -3  -2  11 278.624 17.3327  10
  -3   2  10 145.816 15.3823  11
  -3  -2  10 159.678 14.7162  11
  -3  -2  10 151.596 12.5846  10
   3   2  -9 812.339 116.833   1
  -3   2   9 786.200 128.120   4
   3  -2  -9 937.048 123.321   1
  -3   2   9 841.104 116.446   3
  -3  -2   9 1017.22 133.389   3
   3   2  -9 759.782 110.917   5
  -3   2   8 689.358 107.368   4
  -3  -2   8 516.508 96.1135   3
   3  -2  -8 447.350 85.1653   1
   3   2  -8 549.930 89.3022   1
   3   2  -8 450.935 82.6039   5
  -3   2   8 511.150 88.5191   3
   3  -2  -7 451.103 74.8161   1
  -3  -2   7 542.524 92.2285   3
  -3   2   7 346.949 77.4861   4
  -3   2   7 411.863 79.4305   3
   3   2  -7 373.322 71.4523   1
   3   2  -7 457.502 69.7926   5
  -3  -2   6 591.600 92.4798   3
  -3  -2   6 616.138 76.9897   4
  -3   2   6 514.912 85.2092   4
   3  -2  -6 561.872 75.6927   1
  -3   2   6 678.827 92.5830   3
   3   2  -6 622.457 73.8712   5
  -3  -2   5 13130.6 474.449   4
  -3   2   5 13138.1 504.585   3
  -3  -2   5 13230.1 514.249   3
  -3   2   5 13607.5 507.917   4
   3   2  -5 13292.4 458.512   5
   3  -2  -5 12882.0 467.121   1
  -3  -2   4 11967.5 435.459   4
   3  -2  -4 12170.1 424.685   1
  -3   2   4 11858.9 463.049   4
  -3   2   4 12510.4 468.170   3
  -3  -2   4 12696.3 474.903   3
   3   2  -4 12469.4 424.775   5
   3  -2  -4 12345.8 391.148   5
  -3  -2   3 28995.8 924.026   4
   3   2  -3 29712.6 871.075  13
  -3   2   3 29291.6 957.812   4
   3  -2  -3 29808.0 901.890   1
  -3   2   3 29290.2 950.688   3
  -3  -2   3 29837.0 956.814   3
  -3   2   3 29343.7 923.258   2
   3  -2  -3 29942.4 880.970   5
  -3  -2   3 31253.2 912.512  15
   3   2  -2 10911.4 348.496  13
  -3   2   2 10817.7 409.166   4
  -3   2   2 10397.4 394.048   3
  -3  -2   2 11014.9 399.923   3
   3  -2  -2 10758.2 344.376  17
  -3  -2   2 10272.7 378.406  14
  -3  -2   2 10809.1 368.467  15
  -3   2   2 9954.48 391.364   2
  -3  -2   2 10776.3 382.838   4
   3   2  -1 1559.91 90.0854  13
   3   2  -1 1527.56 72.0376  16
   3  -2  -1 1659.21 80.1957  17
  -3   2   1 1677.76 109.233   3
  -3  -2   1 1791.51 111.710   3
  -3  -2   1 1583.70 97.7620  15
  -3   2   1 1461.35 117.252   2
  -3   2   1 1646.51 121.785   4
  -3   2   1 1417.11 106.644  14
  -3  -2   1 1529.81 108.480  14
  -3  -2   0 8180.90 293.841   3
   3  -2   0 8023.20 273.225  17
   3   2   0 8710.07 300.718  13
   3  -2   0 7894.53 292.580  16
  -3  -2   0 8027.79 304.831  15
  -3   2   0 7740.45 267.497  15
  -3   2   0 7978.29 345.915   2
   3   2   0 8024.45 272.611  16
  -3   2   0 8087.32 324.880  14
  -3  -2   0 8140.74 322.234  14
   3   2   1 186.697 40.8737  13
   3  -2   1 228.598 35.2179  17
  -3   2  -1 174.205 59.5524   2
  -3  -2  -1 202.357 49.6988  14
  -3  -2  -1 223.979 45.4612  15
  -3   2  -1 205.565 51.8654  14
   3   2   1 174.864 32.6554  16
   3  -2   1 237.260 42.2017  16
  -3   2  -1 208.234 35.3967  15
   3   2   2 2894.84 157.577  13
  -3   2  -2 2680.72 171.540  14
   3  -2   2 2897.84 145.874  17
   3   2   2 2791.47 144.904  16
   3  -2   2 3181.23 159.688  16
  -3  -2  -2 2885.45 168.713  15
  -3  -2  -2 2801.40 179.391  14
   3  -2   3 3359.14 177.986  17
   3   2   3 3584.91 190.000  13
   3  -2   3 3472.53 185.268  16
  -3  -2  -3 3949.78 227.385  14
   3   2   3 3784.29 186.854  16
  -3  -2  -3 3569.25 207.023  15
  -3   2  -3 3476.46 209.145  14
  -3  -2  -4 418.235 83.3660  14
   3   2   4 485.224 70.6397  13
  -3   2  -4 383.643 72.0799  14
  -3  -2  -4 428.317 75.7399  15
   3   2   4 432.540 67.4534  16
   3  -2   4 365.867 62.3378  16
   3  -2   5 245.470 61.5166  16
   3   2   5 198.934 51.2778  13
   3  -2   5 125.229 48.6347  13
  -3   2  -5 103.746 51.8827  14
   3   2   5 153.681 52.0119  16
  -3  -2  -5 179.949 66.0681  15
  -3  -2  -6 300.775 83.8482  14
   3   2   6 327.829 71.9948  16
   3   2   6 312.920 64.6327  13
   3  -2   6 285.599 62.7903  13
   3  -2   6 374.361 75.5166  16
  -3  -2  -6 502.902 95.9840  15
  -3   2  -6 400.701 90.2077  14
   3  -2   7 1046.30 38.5254  11
   3  -2   8 46.6652 10.5155  11
   3  -2   9 128.549 14.0088  11
   3  -2  10 91.2771 12.3460  11
   3  -2  11 33.7552 8.65066  11
   3  -2  12 41.4092 7.22577  11
  -3   3  15 29.5468 6.14406  12
  -3  -3  15 34.5526 7.59265  12
  -3   3  15 37.7806 9.09640  11
  -3  -3  15 30.2189 7.97656  11
  -3   3  14 99.5472 10.1245  12
  -3  -3  14 109.464 11.2055  12
  -3   3  14 125.169 14.0728  11
  -3  -3  14 97.9184 11.8947  11
  -3   3  13 127.076 12.5434  12
  -3  -3  13 168.111 15.0007  11
  -3   3  13 128.164 16.6002  11
  -3   3  12 284.403 21.0825  11
  -3  -3  12 279.755 19.0696  11
  -3  -3  12 278.951 17.2847  10
  -3   3  12 251.463 17.2627  12
  -3   3  11 1568.94 53.8653  12
  -3   3  11 1475.46 55.6438  11
  -3  -3  11 1476.39 54.1781  11
  -3  -3  11 1565.67 53.0839  10
  -3   3  10 1069.10 40.5325  12
  -3   3  10 1018.32 42.2808  11
  -3  -3  10 1097.26 39.5322  10
  -3  -3   9 88.6216 64.2356   3
  -3   3   9 196.218 83.1970   4
   3  -3  -9 155.615 65.2236   1
   3   3  -9 119.994 60.8383   1
  -3   3   9 163.056 73.8828   3
   3   3  -9 127.795 62.8501   5
   3   3  -8 151.986 60.8235   1
  -3   3   8 10.1015 50.9411   4
   3  -3  -8 51.4996 51.0717   1
  -3   3   8 64.1472 51.2056   3
  -3  -3   8 131.267 66.6670   3
   3   3  -8 180.542 61.2419   5
  -3   3   7 1272.01 137.771   4
   3   3  -7 1444.55 131.964   1
  -3   3   7 1406.47 135.159   3
  -3  -3   7 1676.64 154.829   3
   3  -3  -7 1322.82 124.482   1
   3   3  -7 1350.35 121.259   5
  -3   3   6 1324.64 131.783   4
  -3   3   6 1293.17 126.267   3
  -3  -3   6 1389.15 135.265   3
   3  -3  -6 1488.65 118.343   1
   3   3  -6 1353.37 109.395   5
  -3  -3   5 6793.90 283.028   4
  -3   3   5 6918.89 324.085   4
   3   3  -5 7138.40 285.985   5
  -3   3   5 7007.27 321.129   3
  -3  -3   5 6990.96 326.348   3
   3  -3  -5 6879.66 284.663   1
  -3   3   4 11767.5 414.999   2
  -3  -3   4 11206.9 406.782   4
  -3   3   4 12112.5 461.145   4
  -3   3   4 12087.9 456.096   3
  -3  -3   4 11956.0 458.969   3
   3   3  -4 11742.9 414.219   5
  -3  -3   4 11495.9 414.097  15
   3  -3  -4 11725.2 406.616   1
  -3   3   3 3660.38 185.244   2
   3   3  -3 3648.38 138.923  13
  -3   3   3 3602.52 203.989   4
  -3   3   3 3608.17 195.475   3
  -3  -3   3 3549.02 195.937   3
   3  -3  -3 3922.21 159.048   1
  -3  -3   3 3844.97 175.318  15
  -3  -3   3 3674.77 169.946   4
   3  -3  -2 8846.00 304.540   1
  -3   3   2 9529.47 378.052   4
   3   3  -2 9782.38 315.612  13
  -3  -3   2 9998.40 346.221  15
  -3   3   2 9550.21 370.588   2
   3  -3  -2 9041.39 317.823  17
  -3   3   2 9888.23 367.594   3
  -3  -3   2 9412.66 363.258   3
  -3  -3   2 9705.78 345.737  14
   3   3  -1 1080.11 74.1059  13
  -3   3   1 1096.48 103.108   4
  -3  -3   1 1192.49 91.0114   3
   3  -3  -1 1078.51 70.4860  17
  -3   3   1 1026.19 90.0482  14
  -3   3   1 1172.04 107.519   2
  -3  -3   1 1096.44 86.1665  15
  -3  -3   1 1404.58 98.2175  14
   3   3   0 3156.46 148.833  13
  -3  -3   0 2887.05 163.420  14
   3  -3   0 2817.78 146.770  16
  -3  -3   0 3058.24 149.040   3
   3   3   0 3184.97 128.399  16
   3  -3   0 3116.46 137.638  17
  -3  -3   0 2861.09 156.318  15
  -3   3   0 3091.43 189.626   2
  -3   3   0 3103.69 170.208  14
   3   3   1 6306.04 257.294  13
   3  -3   1 6078.43 254.294  16
   3  -3   1 6330.45 243.142  17
   3   3   1 6448.53 238.390  16
  -3  -3  -1 6533.77 275.679  15
  -3   3  -1 6358.55 312.733   2
  -3   3  -1 6389.90 283.032  14
  -3  -3  -1 6432.59 285.146  14
   3   3   2 3455.59 176.321  13
   3  -3   2 3498.51 177.221  16
  -3  -3  -2 3633.03 206.369  14
  -3   3  -2 3638.39 230.424   2
   3  -3   2 3182.78 163.152  17
   3   3   2 3443.21 165.404  16
  -3  -3  -2 3504.86 193.842  15
  -3   3  -2 3253.56 191.379  14
  -3  -3  -3 354.812 72.1676  14
   3   3   3 211.979 48.4765  13
   3  -3   3 322.127 54.9361  16
  -3   3  -3 233.129 59.3013  14
   3   3   3 270.074 50.4438  16
   3  -3   3 257.757 49.8187  17
  -3  -3  -3 288.506 64.7973  15
   3   3   4 1113.76 103.063  13
   3   3   4 997.685 98.9924  16
   3  -3   4 914.436 96.5225  16
  -3  -3  -4 892.460 109.340  15
  -3   3  -4 869.121 105.457  14
   3   3   5 2519.21 167.808  13
   3  -3   5 2458.33 172.762  16
  -3  -3  -5 2438.63 194.767  15
   3   3   5 2327.81 170.870  16
  -3   3  -5 2397.41 189.002  14
   3   3   6 1065.89 110.500  13
   3  -3   6 984.084 110.387  13
   3   3   6 811.158 110.115  16
   3  -3   6 994.545 115.361  16
  -3  -3  -6 1095.04 137.442  15
  -3   3  -6 1063.69 132.871  14
   3  -3   7 1009.72 37.7687  11
   3  -3   8 485.247 23.7179  11
   3  -3   9 5.00662 10.2386  11
   3  -3  10 185.049 14.5502  11
   3  -3  11 104.816 11.1785  11
   3  -3  12 7.76351 6.22245  11
  -3  -4  15 33.7978 7.22902  12
  -3   4  15 37.0939 9.31021  11
  -3   4  14 159.586 11.2831  12
  -3   4  14 174.076 15.7658  11
  -3  -4  14 171.265 13.3910  11
  -3  -4  14 144.110 12.4438  12
  -3   4  13 283.833 17.0764  12
  -3   4  13 333.885 21.9034  11
  -3  -4  13 317.499 19.3859  11
  -3   4  12 57.3849 10.8030  12
  -3   4  12 58.8191 15.0117  11
  -3  -4  12 83.3410 13.3661  11
  -3  -4  12 75.7767 11.8997  10
  -3   4  11 882.437 34.6532  12
  -3   4  11 801.807 37.1222  11
  -3  -4  11 849.014 33.9725  10
  -3   4  10 464.970 23.5848  12
  -3   4  10 497.808 26.6990  11
  -3  -4  10 495.803 23.0530  10
  -3   4   9 3102.29 253.434   4
   3  -4  -9 3203.86 234.374   1
  -3  -4   9 3528.13 256.504   3
   3   4  -9 3335.74 235.631   5
   3   4  -9 3385.23 239.458   1
  -3   4   8 334.792 89.6370   4
   3  -4  -8 415.161 87.7556   1
   3   4  -8 510.061 90.2736   1
  -3   4   8 492.652 90.5296   3
  -3  -4   8 453.398 98.9718   3
   3   4  -8 491.138 87.8375   5
  -3   4   7 2640.23 206.351   4
  -3   4   7 2706.24 195.573   3
  -3  -4   7 2833.16 211.149   3
   3  -4  -7 2828.54 185.461   1
   3   4  -7 2857.47 182.926   5
  -3   4   6 4116.68 246.658   4
  -3   4   6 3818.81 232.183   3
  -3  -4   6 4176.56 246.592   3
   3  -4  -6 4213.84 216.745   1
   3   4  -6 3929.74 209.984   5
  -3   4   5 2284.34 166.464   4
  -3   4   5 2320.64 164.245   3
  -3  -4   5 2211.11 163.849   3
   3  -4  -5 1970.67 129.501   1
   3   4  -5 2012.27 132.315   5
  -3   4   4 22378.2 761.686   4
  -3   4   4 22052.9 750.279   3
  -3   4   4 21156.3 719.186   2
  -3  -4   4 22222.8 754.741   3
   3  -4  -4 21543.7 691.189   1
   3   4  -4 21251.4 707.395   5
  -3  -4   4 22352.6 713.053  15
  -3   4   3 10555.1 406.274   2
  -3   4   3 10697.7 425.934   4
  -3   4   3 10988.1 417.394   3
  -3  -4   3 9531.99 403.509   3
   3  -4  -3 10821.4 355.481   1
  -3  -4   3 10566.5 386.063  15
   3   4  -3 10577.4 340.834  13
  -3   4   2 14765.0 533.993   2
  -3   4   2 14547.8 535.676   4
   3   4  -2 15068.3 467.705  13
  -3  -4   2 14793.4 492.943  14
  -3  -4   2 14052.5 516.322   3
   3  -4  -2 14322.6 478.465  17
  -3  -4   2 14869.5 503.497  15
   3  -4  -1 7059.16 259.010  17
   3   4  -1 7253.08 259.522  13
  -3   4   1 6955.28 308.296   4
  -3  -4   1 6691.36 279.673   3
  -3   4   1 6807.64 285.285  14
  -3  -4   1 6909.26 280.972  15
  -3   4   1 7091.26 318.301   2
  -3  -4   1 6785.14 277.322  14
   3   4   0 978.085 77.1693  13
  -3  -4   0 962.718 88.7578  14
  -3  -4   0 930.289 76.8357   3
   3  -4   0 918.785 71.5895  17
   3  -4   0 1014.79 82.2450  16
   3   4   0 1046.68 61.9943  16
  -3  -4   0 851.769 82.9802  15
  -3   4   0 993.679 107.994   2
  -3   4   0 1061.09 94.4489  14
   3  -4   1 2757.59 146.243  17
   3   4   1 3264.62 161.442  13
   3   4   1 3260.08 143.569  16
   3  -4   1 2947.72 158.429  16
  -3  -4  -1 3393.30 181.029  15
  -3   4  -1 3087.78 205.382   2
  -3   4  -1 2850.18 171.729  14
  -3  -4  -1 3093.21 180.344  14
   3   4   2 2588.56 147.234  13
  -3  -4  -2 2668.35 174.829  14
   3  -4   2 2350.89 137.969  17
   3  -4   2 2456.47 147.242  16
   3   4   2 2450.92 135.196  16
  -3   4  -2 2498.78 162.126  14
  -3   4  -2 2260.35 183.727   2
  -3  -4  -2 2345.61 159.979  15
   3   4   3 15.4704 30.3711  13
  -3  -4  -3 19.1062 37.5180  15
   3  -4   3 26.5795 35.2261  16
  -3   4  -3-7.00759 50.5894   2
   3  -4   3 2.84627 29.1148  17
   3   4   3 3.22147 28.5077  16
  -3   4  -3 16.5227 36.7390  14
   3   4   4 3970.01 208.227  13
   3  -4   4 3522.36 205.438  17
   3   4   4 3845.90 208.524  16
   3  -4   4 3609.68 206.588  16
  -3  -4  -4 3909.55 238.125  15
  -3   4  -4 3162.16 214.002  14
   3   4   5 1473.20 128.203  13
   3   4   5 1413.34 131.733  16
   3  -4   5 1569.78 137.451  16
  -3  -4  -5 1548.14 154.947  15
  -3   4  -5 1362.33 141.445  14
   3   4   6 1766.86 143.894  13
   3  -4   6 1299.00 131.600  13
   3   4   6 1532.41 147.219  16
   3  -4   6 1545.32 144.732  16
  -3  -4  -6 1476.39 161.644  15
  -3   4  -6 1381.21 150.852  14
   3  -4   7 700.731 29.5164  11
   3  -4   8 3026.45 95.4143  11
   3  -4   9 239.004 17.1511  11
   3  -4  10 18.0695 9.93511  11
   3  -4  11 11.5815 8.61340  11
   3  -4  12 2.51026 6.22248  11
  -3  -5  15 71.3573 7.98076  12
  -3  -5  14 111.651 11.0779  12
  -3   5  14 107.916 13.4334  11
  -3   5  13 496.556 22.5238  12
  -3   5  13 518.821 27.1350  11
  -3  -5  13 522.127 23.7032  10
  -3   5  12 366.877 19.6711  12
  -3   5  12 380.181 24.3436  11
  -3  -5  12 355.239 20.2441  10
  -3   5  11 1036.56 39.6515  12
  -3   5  11 1022.63 42.8986  11
  -3  -5  11 1034.78 39.2624  10
  -3   5  10 89.4695 11.7528  12
  -3   5  10 111.626 15.8737  11
  -3  -5  10 92.5034 11.6374  10
  -3   5   9 26.1446 58.6179   4
  -3   5   9 6.46998 10.9166  11
  -3  -5   9 10.5995 8.02153  10
  -3  -5   9 58.4611 57.0443   3
   3   5  -9-62.3086 54.1470   1
   3   5  -9 40.7575 54.0746   5
   3  -5  -9 20.9193 50.0356   1
   3   5  -8 136.401 61.5560   1
   3  -5  -8 101.702 57.5599   1
  -3   5   8 63.2445 52.5014   4
  -3  -5   8 102.013 59.7719   3
   3   5  -8 128.585 61.0988   5
  -3   5   7 3016.97 224.987   4
   3  -5  -7 2902.27 190.759   1
  -3  -5   7 2830.43 211.893   3
   3   5  -7 2537.33 181.162   5
  -3   5   6 1521.51 149.734   4
   3  -5  -6 1635.91 128.067   1
  -3  -5   6 1501.81 145.037   3
   3   5  -6 1552.94 125.815   5
  -3   5   5 3441.99 220.853   4
   3  -5  -5 3644.20 184.790   1
  -3  -5   5 3483.19 218.377   3
   3   5  -5 3512.08 189.896   5
  -3   5   4 2120.74 159.206   4
  -3   5   4 1915.35 138.487   2
   3  -5  -4 1978.88 117.266   1
  -3  -5   4 1993.68 150.660   3
   3   5  -4 2057.33 133.622   5
  -3  -5   4 2102.29 133.792  15
   3   5  -3 5311.82 201.692  13
  -3   5   3 5438.28 274.439   4
   3   5  -3 5411.41 241.813   5
  -3   5   3 5566.48 264.618   2
  -3  -5   3 5422.60 262.509   3
  -3  -5   3 5677.79 245.716  15
   3   5  -2 235.099 37.1768  13
  -3   5   2 342.471 64.6882   4
  -3   5   2 238.127 60.0007   2
   3  -5  -2 213.984 39.4517  17
  -3  -5   2 177.826 48.8720   3
  -3  -5   2 207.150 45.3021  15
  -3  -5   2 185.698 36.3660  14
   3   5  -1 108.122 31.1292  13
  -3   5   1 129.443 52.7785   4
  -3   5   1 66.2066 48.7169   2
   3  -5  -1 101.967 33.2414  17
  -3  -5   1 60.1449 34.4955   3
  -3  -5   1 70.8340 37.7339  15
  -3  -5   1 71.3964 32.9477  14
   3   5   0 7545.91 287.384  13
  -3   5   0 7913.94 357.810   2
  -3  -5   0 7657.63 310.015  14
  -3  -5   0 7091.35 290.017   3
  -3   5   0 7930.79 337.735   4
   3  -5   0 7678.89 289.648  17
  -3  -5   0 7237.13 310.835  15
  -3   5   0 7514.41 310.830  14
   3   5   1 2716.59 136.384  16
   3   5   1 3246.98 162.567  13
   3  -5   1 2967.61 155.508  17
   3  -5   1 3071.30 165.296  16
  -3  -5  -1 3066.88 179.590  15
  -3   5  -1 2926.69 205.527   2
  -3   5  -1 3138.73 178.015  14
  -3  -5  -1 3290.88 185.658  14
  -3  -5  -2 20.9250 39.3398  14
   3   5   2-18.5391 27.6497  13
  -3   5  -2 50.3286 58.2529   2
   3  -5   2 5.38369 24.9611  17
   3   5   2 17.6481 24.4617  16
   3  -5   2-4.82859 30.7340  16
  -3  -5  -2 28.2204 35.2704  15
  -3   5  -2-2.74260 31.9964  14
   3  -5   3 391.393 65.0974  16
   3   5   3 390.773 62.8979  13
   3  -5   3 309.697 57.3646  17
  -3   5  -3 338.994 86.7632   2
   3   5   3 342.194 56.3051  16
  -3  -5  -3 445.548 78.6482  15
  -3   5  -3 347.150 64.6873  14
   3   5   4 426.295 70.4323  13
   3   5   4 429.408 68.0944  16
   3  -5   4 440.193 72.5963  17
   3  -5   4 333.792 63.7574  16
  -3  -5  -4 551.072 92.0148  15
  -3   5  -4 343.026 70.7620  14
   3  -5   5 218.769 59.2483  16
   3   5   5 127.717 45.9895  13
   3  -5   5 187.877 64.0965  17
   3   5   5 214.802 61.5168  16
  -3  -5  -5 234.961 72.3452  15
  -3   5  -5 216.641 62.5494  14
   3   5   6 671.846 90.6009  13
   3  -5   6 644.612 95.9577  16
  -3  -5  -6 819.508 122.465  15
   3  -5   7 72.1646 11.8444  11
   3  -5   8 58.4564 12.0858  11
   3  -5   9 240.653 17.0529  11
   3  -5  10 7.72349 9.20682  11
   3  -5  11 146.639 12.0226  11
   3  -5  12 66.3861 7.85722  11
  -3  -6  15 5.04103 5.67341  12
  -3  -6  14 18.7499 7.70046  12
  -3   6  14 10.0399 10.6945  11
  -3   6  13 286.401 20.9152  11
  -3  -6  13 297.409 17.0344  10
  -3   6  12 1130.97 40.8445  12
  -3   6  12 1093.21 45.3859  11
  -3  -6  12 1147.43 41.8568  10
  -3   6  11 343.181 19.7931  12
  -3   6  11 367.329 24.3976  11
  -3  -6  11 388.320 20.6590  10
  -3   6  10 63.0005 10.9092  12
  -3   6  10 74.8113 15.2549  11
  -3  -6  10 68.8945 11.0457  10
  -3   6   9 1631.82 59.2443  11
  -3  -6   9 1697.23 56.4442  10
  -3   6   9 1667.49 56.6184  12
   3  -6  -8 771.026 112.939   1
  -3   6   8 748.731 124.370   4
   3   6  -8 730.251 108.271   1
  -3  -6   8 888.539 127.893   3
   3   6  -8 839.543 115.225   5
   3  -6  -7 17.6277 46.5888   1
  -3   6   7 10.0447 46.3921   4
  -3  -6   7-5.27448 55.1597   3
   3   6  -7 6.25755 45.5871   5
  -3   6   6 4781.95 286.826   4
   3  -6  -6 4677.14 243.480   1
  -3  -6   6 5031.71 287.306   3
   3   6  -6 5115.49 255.691   5
   3  -6  -5 113.744 41.0875   1
  -3   6   5 64.4903 52.5140   4
   3   6  -5 22.3504 35.8235   5
  -3  -6   5 85.6937 55.9020   3
  -3   6   4 1921.92 156.486   4
  -3   6   4 1979.75 147.545   2
   3  -6  -4 1854.52 113.078   1
  -3  -6   4 1637.38 144.512   3
   3   6  -4 1754.38 127.527   5
  -3  -6   4 2004.03 136.943  15
   3   6  -3 11722.8 388.998  13
  -3   6   3 11752.3 473.212   4
  -3   6   3 11833.9 467.088   2
  -3  -6   3 10978.9 453.473   3
   3  -6  -3 11461.2 418.327  17
   3   6  -3 11701.4 432.303   5
  -3  -6   3 11660.7 435.135  15
  -3   6   2 3312.32 201.782   4
   3   6  -2 3438.01 153.057  13
  -3   6   2 3369.46 207.314   2
  -3  -6   2 3101.17 185.134   3
   3  -6  -2 3108.25 161.893  17
  -3  -6   2 3140.51 176.698  15
  -3  -6   2 3304.54 153.823  14
  -3   6   1 8492.06 359.157   4
   3   6  -1 8174.29 300.496  13
  -3   6   1 8614.92 377.072   2
  -3  -6   1 7611.42 324.023   3
   3  -6  -1 7668.25 307.214  17
  -3  -6   1 8420.40 336.506  15
  -3  -6   1 7903.78 308.254  14
  -3   6   0 18618.3 675.534   2
   3   6   0 18391.7 588.583  13
  -3  -6   0 16364.3 587.147   3
   3  -6   0 17336.8 590.560  17
  -3  -6   0 17868.9 622.168  15
  -3   6   0 18490.7 645.899   4
  -3   6   0 17855.0 609.783  14
  -3  -6   0 17709.5 606.020  14
   3   6   1 967.802 86.5472  13
  -3   6  -1 1078.51 127.533   2
   3  -6   1 1135.79 92.8445  17
   3  -6   1 1079.78 97.0046  16
  -3  -6  -1 991.685 101.833  15
  -3   6  -1 1118.87 99.9636  14
  -3  -6  -1 1124.50 105.655  14
  -3  -6  -2 313.695 66.4844  14
   3   6   2 285.876 52.7109  13
  -3   6  -2 451.667 91.3847   2
  -3   6  -2 279.763 57.6287  14
   3  -6   2 361.242 57.0602  17
   3  -6   2 312.411 57.0359  16
  -3  -6  -2 347.848 66.7823  15
   3   6   3 1478.08 117.931  13
   3  -6   3 1464.29 121.858  16
   3  -6   3 1592.37 125.897  17
  -3  -6  -3 1515.51 140.753  15
  -3   6  -3 1295.20 152.784   2
  -3   6  -3 1312.34 122.534  14
   3   6   4 109.447 43.5672  13
  -3   6  -4 138.962 69.6881   2
   3  -6   4 170.199 54.6868  17
   3  -6   4 189.996 51.6655  16
  -3  -6  -4 201.383 66.4881  15
  -3   6  -4 115.358 48.0987  14
   3   6   5 77.5037 46.7853  13
   3  -6   5 224.539 65.4510  16
   3  -6   5 66.1168 43.4067  17
  -3  -6  -5 191.495 71.0584  15
   3  -6   7 449.509 22.9637  11
   3  -6   8 121.482 14.2851  11
   3  -6   9 63.6211 12.0365  11
   3  -6  10 48.7973 10.9975  11
   3  -6  11 282.677 15.7816  11
   3  -6  12 190.085 10.9186  11
  -3  -7  15 9.62016 5.32312  12
  -3  -7  14 189.372 12.6563  12
  -3   7  13 22.5397 13.6066  11
  -3  -7  13 11.2647 9.07280  10
  -3   7  12 540.744 28.8243  11
  -3  -7  12 515.215 24.8632  10
  -3   7  11 1317.22 51.9244  11
  -3  -7  11 1375.46 48.7814  10
  -3   7  10 127.676 16.9145  11
  -3  -7  10 123.903 13.2323  10
  -3   7   9 192.137 17.7931  11
  -3  -7   9 216.948 15.0708  10
  -3   7   8 677.441 121.389   4
   3   7  -8 594.831 102.244   1
  -3  -7   8 696.755 117.057   3
   3   7  -8 499.762 94.1248   5
   3  -7  -8 448.296 91.6102   1
  -3   7   7 3107.22 240.997   4
   3  -7  -7 3119.45 209.499   1
  -3  -7   7 3364.47 243.480   3
   3   7  -7 3271.40 216.386   5
  -3   7   6 2977.99 226.785   4
   3  -7  -6 2947.97 186.521   1
  -3  -7   6 3444.69 234.532   3
   3   7  -6 3363.28 203.162   5
  -3   7   5 2271.69 184.165   4
  -3  -7   5 2054.17 175.688   3
   3   7  -5 2215.76 154.367   5
  -3  -7   5 2547.26 165.543  15
  -3   7   4 2428.93 183.463   4
  -3   7   4 2631.03 180.830   2
  -3  -7   4 2388.44 180.338   3
   3   7  -4 2362.94 154.142   5
  -3  -7   4 2249.18 154.279  15
   3   7  -3 1547.00 98.0315  13
  -3   7   3 1773.55 148.009   4
  -3   7   3 1522.25 140.081   2
  -3  -7   3 1511.93 135.794   3
   3  -7  -3 1594.01 115.743  17
   3   7  -3 1576.11 121.928   5
  -3  -7   3 1755.22 129.282  15
   3   7  -2 1.00716 21.4474  13
  -3   7   2 0.27643 43.0465   2
  -3  -7   2 39.7355 41.1827   3
   3  -7  -2 48.1141 29.3215  17
  -3  -7   2 26.0669 34.2312  15
   3   7  -1 3109.99 159.906  13
  -3   7   1 3470.33 223.406   2
  -3  -7   1 3292.59 189.396  15
  -3  -7   1 3219.59 186.243   3
   3  -7  -1 3119.27 169.967  17
  -3  -7   1 3344.92 163.472  14
  -3   7   1 3312.70 204.659   4
  -3   7   0 5008.96 290.270   2
   3   7   0 5498.84 233.106  13
   3  -7   0 4942.19 233.748  17
  -3  -7   0 5285.32 239.625  14
  -3   7   0 5306.97 270.935   4
  -3  -7   0 5037.48 236.663   3
  -3  -7   0 4917.56 254.193  15
   3   7   1 5043.23 230.245  13
   3  -7   1 4976.70 234.646  17
   3  -7   1 4609.16 233.964  16
  -3  -7  -1 4925.54 257.639  15
  -3   7  -1 4738.91 234.613  14
  -3  -7  -1 5066.62 249.969  14
  -3   7  -1 4850.30 291.724   2
   3  -7   2 1904.46 134.849  17
   3  -7   2 1822.35 136.299  16
  -3  -7  -2 1854.67 154.184  15
  -3   7  -2 1688.49 171.970   2
  -3   7  -2 1886.77 137.541  14
  -3  -7  -2 1971.72 154.266  14
   3   7   2 1637.33 125.743  13
   3   7   3 533.918 75.6782  13
   3  -7   3 507.382 76.4392  17
  -3   7  -3 507.587 104.951   2
  -3   7  -3 445.587 71.1657  14
   3  -7   3 419.965 70.4990  16
  -3  -7  -3 438.407 82.9216  15
   3   7   4 1505.97 128.683  13
   3  -7   4 1245.67 128.121  17
   3  -7   4 1319.93 125.921  16
  -3   7  -4 1465.19 176.370   2
  -3  -7  -4 1346.09 146.219  15
   3   7   5 1461.63 135.855  13
   3  -7   5 1370.40 143.162  17
   3  -7   5 1751.96 150.121  16
  -3  -7  -5 1689.12 171.234  15
   3  -7   7 2979.82 94.2060  11
   3  -7   8 971.862 37.9845  11
   3  -7   9 444.373 22.9937  11
   3  -7  10 8.26074 9.41386  11
   3  -7  11 133.453 11.4348  11
   3  -7  12 52.6877 6.92803  11
  -3  -8  14 12.4037 6.92003  12
  -3   8  13 310.813 20.2913  11
  -3  -8  13 286.402 16.5411  10
  -3   8  12 558.995 29.3786  11
  -3  -8  12 555.622 25.4685  10
  -3   8  11 911.543 40.1452  11
  -3  -8  11 915.173 36.0188  10
  -3   8  10 1263.22 50.6118  11
  -3  -8  10 1342.93 47.3901  10
  -3   8   9 307.273 21.2957  11
  -3  -8   9 296.974 17.5641  10
   3   8  -8 306.083 78.9007   1
  -3   8   8 128.187 63.5809   4
  -3   8   8 294.940 20.1586  11
  -3  -8   8 326.766 17.6123  10
   3  -8  -8 399.055 88.5018   1
  -3  -8   8 381.337 94.1469   3
   3   8  -8 372.081 87.9756   5
  -3   8   7 2860.14 230.564   4
   3  -8  -7 2267.95 181.175   1
  -3  -8   7 2351.19 209.802   3
   3   8  -7 2771.59 200.453   5
  -3   8   6 8036.55 413.554   4
  -3  -8   6 8943.99 426.230   3
   3   8  -6 7844.17 368.953   5
  -3   8   5 786.200 114.692   4
  -3   8   5 862.642 108.805   2
  -3  -8   5 949.714 103.829  15
  -3  -8   5 1048.93 130.113   3
   3   8  -5 799.363 96.3826   5
  -3   8   4 333.065 77.4681   4
  -3   8   4 354.023 80.6969   2
  -3  -8   4 276.780 73.8654   3
  -3  -8   4 287.563 60.4814  15
   3   8  -4 317.528 63.1616   5
   3   8  -3 3364.28 169.264  13
  -3   8   3 3760.97 230.922   4
   3  -8  -3 3292.44 186.221  17
  -3   8   3 3617.51 230.626   2
  -3  -8   3 3094.00 208.833   3
   3   8  -3 3438.93 195.585   5
  -3  -8   3 3523.30 202.960  15
   3   8  -2 1824.24 117.841  13
  -3   8   2 1821.19 153.158   4
  -3   8   2 1896.83 164.899   2
  -3  -8   2 1895.65 149.536   3
   3  -8  -2 1786.94 127.994  17
  -3  -8   2 1789.07 138.735  15
   3   8  -1 3479.91 174.669  13
  -3   8   1 3071.43 223.525   2
  -3   8   1 3290.63 209.683   4
  -3  -8   1 2994.36 187.740   3
   3  -8  -1 3312.51 183.286  17
  -3  -8   1 3378.26 198.367  15
   3   8   0 3849.61 193.014  13
  -3   8   0 3836.43 251.961   2
  -3  -8   0 3430.37 194.255   3
   3  -8   0 3671.73 198.274  17
  -3  -8   0 3775.16 217.535  15
   3   8   1 1869.26 132.218  13
   3  -8   1 1928.57 138.188  17
   3  -8   1 1599.30 130.151  16
  -3  -8  -1 1972.42 155.098  15
  -3  -8  -1 2030.10 144.933  14
  -3   8  -1 1912.44 180.282   2
   3   8   2 2768.68 171.500  13
   3  -8   2 2556.87 170.424  16
   3  -8   2 2458.68 168.041  17
  -3  -8  -2 2484.06 187.548  15
  -3   8  -2 3099.46 237.436   2
  -3  -8  -2 3003.00 196.006  14
   3   8   3 1898.37 145.076  13
   3  -8   3 1855.48 149.880  17
   3  -8   3 2005.93 153.990  16
  -3  -8  -3 2132.40 179.513  15
  -3   8  -3 1952.69 198.249   2
   3   8   4 115.401 51.3336  13
  -3  -8  -4 28.5099 45.7655  15
  -3   8  -4 157.883 66.6913   2
   3  -8   4 58.6628 47.1586  17
   3  -8   4 79.0219 41.8223  16
   3  -8   5 1784.05 155.670  16
   3   8   5 1671.74 146.847  13
  -3   8  -5 1704.95 60.8073   7
   3  -8   5 1689.02 161.800  17
  -3  -8  -5 1793.35 179.047  15
   3  -8   7 209.201 16.8994  11
   3  -8   8 25.6264 12.1176  11
   3  -8   9 34.0881 11.5994  11
   3  -8  10 0.52563 9.39593  11
   3  -8  11 30.1540 8.13085  11
  -3  -9  14 15.9296 6.29566  12
  -3  -9  13 72.5580 9.69938  10
  -3  -9  12 253.955 16.9648  10
  -3   9  11 2081.53 73.1098  11
  -3  -9  11 2092.96 69.0864  10
  -3   9  10 124.571 17.9552  11
  -3  -9  10 136.893 13.3847  10
  -3   9   9 410.658 25.0994  11
  -3  -9   9 435.292 21.8265  10
  -3   9   8 1344.81 51.4065  11
  -3  -9   8 1376.17 48.0499  10
  -3   9   7 3145.46 254.557   4
  -3  -9   7 3185.30 248.935   3
   3   9  -7 3154.33 225.233   5
  -3   9   6 1352.41 156.073   4
   3   9  -6 1432.60 140.851   5
  -3  -9   6 1575.89 168.110   3
  -3   9   5 992.157 130.858   4
  -3   9   5 1035.68 127.333   2
   3   9  -5 922.820 105.520   5
  -3  -9   5 933.854 125.725   3
  -3  -9   5 1089.45 116.234  15
  -3   9   4 2771.35 211.070   4
  -3   9   4 2625.87 205.306   2
  -3  -9   4 2689.46 206.644   3
   3  -9  -4 2736.37 178.648  17
   3   9  -4 2837.64 181.261   5
  -3  -9   4 2910.06 188.133  15
   3   9  -3 5585.32 256.641  13
  -3   9   3 6334.60 323.501   4
  -3   9   3 5927.77 328.869   2
  -3  -9   3 6164.14 320.909   3
   3  -9  -3 5963.05 281.592  17
   3   9  -3 5987.60 284.384   5
  -3  -9   3 6210.22 298.254  15
   3   9  -2 778.817 80.8705  13
   3  -9  -2 757.080 87.1233  17
  -3   9   2 819.879 105.473   4
  -3   9   2 1013.05 126.503   2
   3   9  -2 868.026 97.5974   5
  -3  -9   2 704.758 96.7865   3
  -3  -9   2 633.347 87.7689  15
   3   9  -1 820.063 82.8237  13
  -3  -9   1 763.955 94.5966  15
  -3   9   1 894.396 125.587   2
   3  -9  -1 680.049 83.2263  17
  -3  -9   1 770.442 97.3743   3
  -3   9   1 1036.06 115.275   4
   3   9   0 7426.96 308.236  13
  -3   9   0 7695.01 393.306   2
   3  -9   0 6591.17 309.945  17
  -3  -9   0 6618.11 328.873  15
  -3   9  -1 6319.03 367.122   2
   3   9   1 6912.20 300.480  13
   3  -9   1 6000.53 296.232  16
   3  -9   1 6274.07 299.222  17
  -3  -9  -1 6723.25 328.249  15
   3   9   2 1366.01 120.889  13
  -3   9  -2 1268.45 163.561   2
   3  -9   2 1078.99 113.280  16
   3  -9   2 1370.68 125.957  17
  -3  -9  -2 1315.01 135.683  15
  -3  -9  -2 1356.46 129.489  14
  -3  -9  -3 771.005 109.607  14
   3   9   3 849.871 99.0421  13
  -3   9  -3 623.046 122.828   2
   3  -9   3 481.502 81.3295  16
  -3  -9  -3 839.640 113.590  15
   3  -9   3 826.204 103.575  17
   3   9   4 2787.63 190.348  13
   3  -9   4 2442.64 191.346  17
   3  -9   4 2686.40 189.496  16
  -3  -9  -4 2355.53 205.022  15
  -3   9  -4 2403.71 236.692   2
  -3   9  -5 646.765 30.9444   7
   3  -9   7 928.060 36.9522  11
   3  -9   8 437.236 23.3258  11
   3  -9   9 2.72293 10.2392  11
   3  -9  10-7.19768 9.02962  11
   3  -9  11-3.36868 6.93673  11
  -3 -10  14 159.390 9.65146  12
  -3  10  14 179.866 10.7077   6
  -3 -10  13 101.616 9.83635  12
  -3 -10  13 110.751 10.3491  10
  -3 -10  12 269.123 16.5123  10
  -3 -10  11 563.546 26.1681  10
  -3 -10  10 1910.49 64.1988  10
  -3 -10   9 401.968 21.2002  10
  -3 -10   8 129.603 12.4646  10
  -3 -10   7 1696.10 57.0768  10
  -3  10   6 1795.84 183.545   4
   3  10  -6 1919.27 166.523   5
  -3 -10   6 1612.66 177.787   3
  -3  10   5 454.386 99.7112   4
  -3  10   5 427.222 92.4335   2
   3 -10  -5 502.874 81.0916  17
  -3 -10   5 596.986 107.121   3
  -3 -10   5 614.970 89.9761  15
   3  10  -5 638.524 93.4976   5
  -3 -10   4 334.869 83.6590   3
  -3  10   4 435.586 89.5655   4
  -3  10   4 273.737 77.4827   2
   3 -10  -4 383.007 72.6961  17
  -3 -10   4 370.230 72.2426  15
   3  10  -4 382.413 74.3214   5
   3 -10  -3 47.6467 39.1220  17
  -3  10   3 40.3622 46.7219   4
  -3  10   3 1.31569 49.2827   2
  -3 -10   3 29.2940 40.2132  15
  -3 -10   3 76.5091 56.6007   3
   3  10  -3 11.5504 37.7052   5
  -3  10   2 1522.40 148.447   4
   3  10  -2 1656.95 127.274  13
  -3  10   2 1835.62 178.015   2
  -3 -10   2 1994.14 167.524   3
   3 -10  -2 1551.63 132.324  17
   3  10  -2 1803.16 143.031   5
  -3 -10   2 1669.35 145.335  15
   3  10  -1 10203.8 400.154  13
  -3  10   1 10389.8 489.615   2
   3 -10  -1 9864.03 409.360  17
  -3  10   1 10752.2 448.550   4
  -3 -10   1 9547.36 423.830  15
   3  10   0 2029.47 146.640  13
  -3  10   0 2332.05 207.116   2
   3 -10   0 1910.85 148.294  17
  -3 -10   0 1889.89 160.153  15
  -3  10  -1 1521.95 177.049   2
   3  10   1 1581.79 132.376  13
   3 -10   1 1449.38 131.710  17
  -3 -10  -1 1604.39 150.320  15
   3 -10   1 1518.56 134.828  16
   3  10   2 138.963 51.8936  13
   3 -10   2 56.1416 43.3477  16
   3 -10   2 89.3396 46.5213  17
  -3  10  -2 22.8864 68.7182   2
  -3 -10  -2 143.550 60.8775  15
   3  10   3 33.7562 40.7461  13
  -3  10  -3 2.75294 58.7376   2
   3 -10   3 12.1485 38.0139  16
   3 -10   3 42.4596 41.6738  17
  -3 -10  -3 112.672 60.7354  15
  -3  10  -4 543.789 27.4602   7
  -3  10  -4 634.382 130.032   2
   3 -10   4 619.231 98.8748  17
   3 -10   4 553.189 88.6205  16
  -3 -10  -4 609.096 104.858  15
  -3  10  -5 1943.97 68.7731   7
   3 -10   7 672.743 29.8757  11
   3 -10   8 595.394 27.2891  11
   3 -10   9 1.64527 9.94766  11
   3 -10  10 40.3627 9.79013  11
   3 -10  11 9.14610 6.62273  11
  -3 -11  13 123.153 9.74566  12
  -3 -11  13 161.788 10.7320  10
  -3  11  13 152.030 11.7207   6
  -3 -11  12 444.171 20.9303  10
  -3 -11  11 233.944 16.0992  10
  -3 -11  10 125.640 13.0130  10
  -3 -11   9 176.692 14.8326  10
  -3 -11   8 372.428 20.1587  10
  -3 -11   7 365.156 19.4975  10
   3 -11  -6 1943.98 170.449  17
  -3  11   6 1871.51 193.384   4
  -3 -11   6 1901.37 196.131   3
  -3 -11   6 1904.05 61.0196   9
   3  11  -6 2025.81 176.717   5
  -3  11   5 104.554 72.7957   4
  -3  11   5 14.4588 57.9874   2
   3 -11  -5 12.3002 39.3009  17
  -3 -11   5-22.2720 57.5859   3
   3  11  -5-2.95637 48.2078   5
  -3 -11   4-0.98520 52.7843   3
  -3  11   4 95.8352 55.7241   4
  -3  11   4 80.9301 71.6530   2
   3 -11  -4 92.5108 49.3267  17
  -3 -11   4 88.5451 44.8619  15
   3  11  -4 96.0017 52.4544   5
  -3  11   3 390.156 85.8682   4
  -3  11   3 462.292 102.001   2
   3 -11  -3 371.100 74.5648  17
  -3 -11   3 433.690 92.4419   3
  -3 -11   3 402.263 76.8680  15
   3  11  -3 454.022 80.4324   5
  -3  11   2 3482.05 231.203   4
   3  11  -2 3137.81 195.052  13
  -3  11   2 3147.05 249.390   2
  -3 -11   2 3053.98 224.956   3
   3 -11  -2 3301.28 208.436  17
   3  11  -2 3251.53 204.713   5
  -3 -11   2 3225.69 214.898  15
   3  11  -1 49.3924 41.9412  13
  -3  11   1 19.3627 42.3725   4
  -3  11   1-27.0920 56.3513   2
   3 -11  -1-3.83084 39.9018  17
  -3 -11   1 49.7850 48.1678   3
  -3 -11   1-28.9708 49.2913  15
   3  11  -1 8.90551 45.1386   5
   3  11   0 2487.37 174.507  13
  -3  11   0 2116.85 213.341   2
   3 -11   0 2347.50 172.832  17
  -3 -11   0 2110.85 176.579  15
  -3  11  -1 3360.10 269.935   2
   3  11   1 3113.31 203.962  13
   3 -11   1 3381.54 213.549  17
   3 -11   1 3015.82 201.459  16
  -3 -11  -1 3056.09 221.119  15
   3  11   2 2027.26 164.696  13
   3 -11   2 1852.05 157.293  16
   3 -11   2 2037.68 168.234  17
  -3 -11  -2 2011.14 180.761  15
  -3  11  -2 2256.01 224.668   2
   3  11   3 1007.27 118.654  13
  -3  11  -3 1005.36 40.5250   7
  -3  11  -3 978.617 157.139   2
   3 -11   3 1010.59 121.196  17
   3 -11   3 986.713 116.224  16
  -3 -11  -3 898.417 125.266  15
  -3  11  -4 416.435 24.2537   7
  -3  11  -5 626.422 31.0807   7
   3 -11   7 32.5706 12.3086  11
   3 -11   8 67.7903 12.3212  11
   3 -11   9 30.9078 10.3491  11
   3 -11  10 10.3867 8.19142  11
   3 -11  11 140.475 9.18105  11
  -3 -12  13 53.6716 7.36202  10
  -3  12  13 53.8617 8.23119   6
  -3 -12  12 92.4366 10.3167  10
  -3  12  12 85.4785 11.5093   6
  -3 -12  11 145.784 13.4776  10
  -3 -12  10 21.1906 9.80146  10
  -3 -12   9 684.378 29.6435  10
  -3 -12   8 2135.66 70.5778  10
  -3 -12   7 950.661 36.8555  10
  -3  12   6 9.55420 10.4730   6
  -3 -12   6 8.62476 7.16119   9
  -3  12   5 2999.57 243.789   4
  -3  12   5 2714.14 241.326   2
  -3  12   5 2782.26 92.9474   6
  -3 -12   5 3285.10 260.481   3
  -3 -12   5 2933.75 88.4411   9
   3 -12  -5 2633.96 203.599  17
   3  12  -5 3014.04 212.790   5
   3 -12  -4 108.571 55.2256  17
  -3  12   4 311.422 83.1525   4
  -3  12   4 156.423 75.7420   2
  -3 -12   4 143.848 71.5591   3
  -3 -12   4 187.194 60.3206  15
   3  12  -4 167.395 58.2904   5
  -3  12   3 607.699 106.869   4
  -3  12   3 575.001 119.446   2
   3 -12  -3 578.048 90.6751  17
  -3 -12   3 593.411 109.274   3
  -3 -12   3 519.576 89.1671  15
   3  12  -3 478.600 84.8698   5
  -3 -12   2 786.683 108.218  15
  -3  12   2 769.203 115.019   4
  -3  12   2 759.043 132.387   2
   3 -12  -2 842.205 107.352  17
  -3 -12   2 791.316 121.800   3
   3  12  -2 927.925 110.113   5
   3  12  -1 1632.53 143.624  13
  -3  12   1 1748.04 195.510   2
  -3 -12   1 1378.51 152.970   3
   3 -12  -1 1638.15 147.147  17
   3  12  -1 1422.12 136.148   5
  -3 -12   1 1716.99 159.476  15
   3  12   0 90.2400 54.7343  13
   3 -12   0 47.9259 48.1042  17
  -3  12   0 66.7672 74.6764   2
  -3 -12   0 48.0312 46.7396  15
   3  12   1 858.999 108.158  13
   3 -12   1 659.340 98.5263  17
   3 -12   1 721.087 99.4733  16
  -3 -12  -1 693.622 108.808  15
   3  12   2 693.101 99.4679  13
  -3  12  -2 468.662 24.9010   7
   3 -12   2 575.464 95.0226  17
  -3  12  -2 479.237 25.0095   6
  -3  12  -2 408.890 106.903   2
  -3 -12  -2 415.779 20.4248   9
   3 -12   2 537.285 85.1631  16
  -3 -12  -2 457.819 93.4879  15
  -3 -12  -3 638.218 26.5997   9
  -3  12  -3 650.373 30.7270   7
  -3  12  -4 674.704 32.3939   7
  -3 -12  -4 678.025 27.9146   9
  -3  12  -5 5169.84 160.297   7
   3 -12   7 237.937 17.3448  11
   3 -12   8 69.5163 12.6359  11
  -3 -12  -8 46.9542 8.31649   9
   3 -12   9 16.6204 9.70927  11
   3 -12  10 69.5530 8.98680  11
  -3 -13  13 11.7487 5.39560  10
  -3  13  13 9.54442 5.98895   6
  -3 -13  12 82.9193 9.63326  10
  -3  13  12 96.6432 11.0846   6
  -3 -13  11 52.9570 10.4308  10
  -3  13  11 49.4574 11.8141   6
  -3  13  10 394.556 23.6349   6
  -3 -13  10 423.948 21.2398  10
  -3  13   9 260.831 19.4694   6
  -3 -13   9 238.110 16.5809  10
  -3  13   8 402.524 24.6462   6
  -3 -13   8 441.470 22.2095  10
  -3  13   7 551.772 29.4006   6
  -3 -13   7 606.469 26.7741  10
  -3  13   6 572.429 28.6474   6
  -3 -13   6 572.776 24.1516   9
  -3  13   5 40.8920 12.0688   6
  -3 -13   5 50.0587 8.70476   9
  -3  13   4 336.058 97.1307   4
  -3  13   4 316.700 20.2509   6
  -3  13   4 384.898 107.333   2
  -3 -13   4 284.599 15.5595   9
  -3  13   3 2151.50 220.720   2
   3 -13  -3 2544.66 192.545  17
  -3 -13   3 2377.01 217.644   3
  -3 -13   3 2158.36 68.8986   9
  -3 -13   3 2279.96 186.613  15
   3  13  -3 2589.11 187.665   5
   3 -13  -2 2079.94 176.679  17
  -3  13   2 2437.02 235.540   2
  -3 -13   2 2285.43 208.604   3
   3  13  -2 2247.69 174.620   5
  -3 -13   2 2238.85 188.351  15
   3  13  -1 175.870 62.9011  13
   3 -13  -1 178.838 62.5210  17
  -3  13   1 251.126 97.9624   2
  -3 -13   1 154.494 56.6992  15
   3  13  -1 95.5062 53.3286   5
   3  13   0 3732.79 237.625  13
  -3  13   0 3775.37 299.681   2
   3  13   0 3694.51 228.134   5
  -3  13   0 3235.63 105.033   7
   3 -13   0 3189.83 222.891  17
  -3 -13   0 3296.61 100.925   9
   3 -13   0 3587.47 227.352  16
  -3 -13   0 3544.50 243.480  15
  -3  13  -1 1912.38 67.1223   7
  -3  13  -1 1913.15 67.1657   6
  -3 -13  -1 1959.41 62.8216   9
  -3  13  -2 559.247 28.3235   7
  -3 -13  -2 546.581 24.0352   9
  -3  13  -3 119.250 15.8779   7
  -3 -13  -3 155.859 12.4151   9
  -3  13  -4 1278.69 49.6197   7
  -3 -13  -4 1237.65 44.1372   9
  -3  13  -5 2258.60 75.5779   7
  -3 -13  -5 2085.07 69.1215   9
  -3 -13  -6 92.3088 10.4556   9
  -3 -13  -7 176.910 12.1394   9
   3 -13   7 198.950 15.6344  11
   3 -13   8 127.231 12.8517  11
   3 -13   9 72.5971 9.86054  11
   3 -13  10 71.3556 7.94233  11
  -3 -14  12 7.67920 6.32992  10
  -3  14  12 14.0952 7.60815   6
  -3 -14  11 106.589 10.9009  10
  -3  14  11 101.454 12.2029   6
  -3  14  10 184.762 16.5345   6
  -3 -14  10 183.525 14.3640  10
  -3  14   9 232.918 18.8850   6
  -3 -14   9 268.907 17.3281  10
  -3  14   8 478.187 26.7398   6
  -3 -14   8 478.381 23.7608  10
  -3 -14   7 156.712 14.0403  10
  -3  14   7 157.245 16.3016   6
  -3  14   6 28.1718 11.7507   6
  -3  14   5 962.388 40.9477   6
  -3 -14   5 1002.69 35.9744   9
  -3  14   4 675.503 32.3274   6
  -3 -14   4 710.682 27.6535   9
  -3  14   3 2644.63 89.2027   6
  -3 -14   3 2731.90 83.8750   9
  -3  14   2 30.8744 11.1785   7
  -3  14   2 37.2760 12.6833   6
  -3 -14   2 42.8690 8.56561   9
  -3  14   1 3225.15 105.661   7
  -3  14   1 3290.14 106.234   6
  -3 -14   1 3361.71 101.146   9
  -3  14   0 493.308 26.2272   7
  -3  14   0 477.267 26.2750   6
  -3 -14   0 511.029 22.2832   9
  -3  14  -1 199.399 17.5526   7
  -3  14  -1 199.636 17.6763   6
  -3 -14  -1 197.047 13.5477   9
  -3  14  -2 81.6304 14.2570   7
  -3 -14  -2 93.5093 10.5109   9
  -3  14  -3 31.0899 12.5421   7
  -3 -14  -3 43.7602 9.20569   9
  -3  14  -4 44.7456 14.3316   7
  -3 -14  -4 42.2123 9.33301   9
  -3  14  -5 1142.35 45.1429   7
  -3 -14  -5 1033.18 38.3163   9
  -3 -14  -6 120.163 10.9400   9
   3 -14   7 4.21923 10.0794  11
   3 -14   8 87.9224 11.3895  11
   3 -14   9 25.4334 8.11062  11
   3 -14  10 82.7225 7.36333  11
  -3  15  12 68.2765 8.13532   6
  -3 -15  12 72.4352 7.18005  10
  -3  15  11 75.1962 10.9109   6
  -3 -15  11 72.5475 9.15577  10
  -3  15  10 7.01602 10.4056   6
  -3 -15  10 9.10451 8.30735  10
  -3  15   9 441.648 24.4777   6
  -3 -15   9 442.695 21.8055  10
  -3  15   8 488.090 26.9380   6
  -3 -15   8 492.320 23.8473  10
  -3 -15   7 159.355 14.0552  10
  -3  15   7 139.928 16.4275   6
  -3  15   6 178.610 16.9581   6
  -3  15   5 617.043 31.4050   6
  -3 -15   5 694.223 27.2226   9
  -3  15   4 345.221 22.4837   6
  -3 -15   4 338.334 17.4980   9
  -3  15   3 736.474 34.4957   6
  -3 -15   3 767.924 29.4350   9
  -3  15   2 1027.75 42.7958   7
  -3  15   2 1064.71 43.6077   6
  -3 -15   2 1083.88 38.1402   9
  -3  15   1 3770.87 122.071   7
  -3  15   1 3833.70 123.003   6
  -3 -15   1 3947.27 117.077   9
  -3  15   0 1424.45 52.9775   7
  -3  15   0 1353.52 53.0869   6
  -3 -15   0 1395.62 47.5574   9
  -3  15  -1 1370.79 52.5828   7
  -3  15  -1 1324.09 52.5186   6
  -3 -15  -1 1413.65 47.5068   9
  -3  15  -2 214.697 19.1311   7
  -3 -15  -2 217.242 14.2140   9
  -3  15  -3 134.922 16.8852   7
  -3 -15  -3 127.900 11.3870   9
  -3 -15  -4 432.317 20.2970   9
  -3  15  -4 435.819 25.9445   7
  -3  15  -5 530.978 28.2685   7
  -3 -15  -5 515.152 22.2142   9
   3 -15   7 93.7691 11.6020  11
   3 -15   8 111.420 10.8579  11
   3 -15   9 383.873 16.3168  11
  -3  16  11 394.857 19.1681   6
  -3 -16  11 433.462 17.6766  10
  -3  16  10 268.017 16.8632   6
  -3 -16  10 260.532 14.6578  10
  -3  16   9 452.549 24.3811   6
  -3 -16   9 513.889 22.5337  10
  -3  16   8 64.3517 13.9587   6
  -3 -16   8 55.3506 11.0733  10
  -3  16   7-1.38878 11.9712   6
  -3 -16   7 5.24441 9.68729  10
  -3  16   6 177.213 17.4230   6
  -3  16   5 1534.44 59.4158   6
  -3 -16   5 1663.93 53.9446   9
  -3  16   4 536.638 28.1170   6
  -3 -16   4 520.896 22.9413   9
  -3  16   3 2849.55 96.6427   7
  -3  16   3 2935.57 97.7388   6
  -3 -16   3 3035.91 91.4774   9
  -3  16   2 1860.57 68.2620   7
  -3  16   2 1887.61 69.0504   6
  -3 -16   2 2033.45 63.2374   9
  -3  16   1 809.168 36.5785   7
  -3  16   1 776.465 36.4898   6
  -3 -16   1 836.789 31.1762   9
  -3  16   0 122.697 16.0352   7
  -3  16   0 134.756 16.5263   6
  -3 -16   0 127.077 11.3177   9
  -3  16  -1 333.904 22.1891   7
  -3  16  -1 300.724 22.1791   6
  -3 -16  -1 318.637 16.9688   9
  -3  16  -2 1078.47 44.7187   7
  -3 -16  -2 1094.16 38.9122   9
  -3  16  -3 2994.79 97.7724   7
  -3 -16  -3 2934.44 91.0628   9
  -3  16  -4 416.692 25.3412   7
  -3 -16  -4 436.111 19.6023   9
  -3  16  -5 24.5824 13.0632   7
   3 -16   7 24.3029 8.97315  11
   3 -16   8 33.3222 7.38254  11
  -3  17  11 28.3299 6.78678   6
  -3 -17  11 23.8968 5.27446  10
  -3  17  10 46.7747 9.42067   6
  -3 -17  10 66.0428 8.16037  10
  -3 -17   9 163.581 12.2394  10
  -3  17   9 144.424 14.2610   6
  -3  17   8 310.535 20.4182   6
  -3 -17   8 338.787 17.9041  10
  -3  17   7 185.285 17.4161   6
  -3 -17   7 184.076 14.7616  10
  -3  17   6 663.015 32.3245   6
  -3  17   5 1079.82 44.3006   6
  -3  17   4 1153.05 47.4460   7
  -3  17   4 1203.92 48.8810   6
  -3 -17   4 1286.66 42.8112   9
  -3  17   3 4847.90 156.485   7
  -3  17   3 5014.62 157.626   6
  -3 -17   3 5249.73 150.803   9
  -3  17   2 2469.26 85.9871   7
  -3  17   2 2571.02 87.2695   6
  -3 -17   2 2638.94 80.4109   9
  -3  17   1 302.793 21.5830   7
  -3  17   1 289.371 21.6274   6
  -3 -17   1 303.311 16.0299   9
  -3  17   0 160.299 17.4332   7
  -3  17   0 124.770 16.7764   6
  -3 -17   0 134.550 11.2419   9
  -3  17  -1 104.051 15.2528   7
  -3  17  -1 123.594 16.6968   6
  -3 -17  -1 106.599 10.3624   9
  -3  17  -2 252.694 20.4797   7
  -3 -17  -2 266.836 14.6612   9
  -3  17  -3 70.8374 14.8907   7
  -3 -17  -3 52.1023 8.27526   9
  -3  17  -4 429.569 25.3735   7
  -3  17  -5 565.584 28.1634   7
   3 -17   6 38.4558 9.34475  11
  -3  17  -7 12.0314 5.95193   8
   3 -17   7 15.6579 7.66079  11
   3 -17   8 150.036 9.31388  11
  -3  18  10 58.5824 7.50827   7
  -3  18  10 58.0066 8.34354   6
  -3 -18  10 61.7637 6.72036  10
  -3  18   9 63.1942 10.2284   6
  -3 -18   9 50.3320 8.01090  10
  -3  18   8 99.5807 12.5668   6
  -3 -18   8 107.044 10.6227  10
  -3  18   7 123.102 14.3850   6
  -3 -18   7 128.402 12.0942  10
  -3  18   6 92.2438 14.6636   6
  -3 -18   6 114.648 11.9843  10
  -3  18   5 345.526 22.2870   7
  -3  18   5 362.619 22.8430   6
  -3  18   4 1185.86 47.0409   7
  -3  18   4 1229.14 48.1157   6
  -3  18   3 3323.98 110.408   7
  -3  18   3 3407.14 111.575   6
  -3 -18   3 3554.17 104.774   9
  -3  18   2 708.291 34.1903   7
  -3  18   2 729.478 35.0936   6
  -3 -18   2 812.258 29.2950   9
  -3  18   1 157.116 17.5398   7
  -3  18   1 165.654 17.7340   6
  -3 -18   1 191.429 12.3411   9
  -3  18   0 428.633 25.5817   7
  -3  18   0 433.919 26.0603   6
  -3 -18   0 468.230 20.0398   9
  -3  18  -1 45.2687 13.5375   7
  -3 -18  -1 28.3578 7.35799   9
  -3  18  -2 140.055 16.2031   7
  -3 -18  -2 152.463 10.7845   9
  -3  18  -3 107.930 15.0298   7
  -3  18  -4 139.779 16.1314   7
  -3  18  -5 56.6624 11.9213   7
   3 -18   6 27.4221 7.62004  11
   3 -18   7 141.141 9.20677  11
  -3  18  -7 124.109 8.12233   8
  -3  19   9 77.2490 8.61419   7
  -3 -19   9 80.7683 7.58089  10
  -3  19   9 80.5310 9.57527   6
  -3  19   8 203.593 14.0952   7
  -3  19   8 237.745 15.4976   6
  -3 -19   8 253.153 13.2735  10
  -3  19   7 0.10200 9.25555   7
  -3  19   7 5.15936 9.54487   6
  -3 -19   7 3.21366 7.22273  10
  -3  19   6 89.6872 12.8013   7
  -3  19   6 119.315 14.5246   6
  -3 -19   6 108.129 10.9739  10
  -3  19   5 22.7237 11.3154   7
  -3  19   5 28.4365 12.2134   6
  -3  19   4 263.097 19.4543   7
  -3  19   4 256.227 19.8846   6
  -3  19   3 652.128 31.3487   7
  -3  19   3 656.699 31.8549   6
  -3 -19   3 717.535 26.4041   9
  -3  19   2 621.799 30.8469   7
  -3  19   2 604.759 30.8004   6
  -3 -19   2 677.425 25.2829   9
  -3  19   1 846.189 36.8138   7
  -3  19   1 853.270 37.7779   6
  -3 -19   1 864.196 30.6779   9
  -3  19   0 356.318 22.7101   7
  -3  19   0 357.654 23.3337   6
  -3 -19   0 387.701 17.0244   9
  -3  19  -1 95.5045 14.6034   7
  -3  19  -2 220.406 18.6021   7
  -3  19  -3 176.751 16.2132   7
  -3  19  -4 170.034 15.3449   7
   3 -19   6 50.7805 7.00299  11
  -3  20   8 117.608 9.88298   7
  -3  20   8 126.813 10.5998   6
  -3 -20   8 142.940 9.06229  10
  -3  20   7 26.7412 8.27907   7
  -3  20   7 16.7831 8.66613   6
  -3 -20   7 14.9893 6.52494  10
  -3  20   6 62.5181 10.7998   7
  -3  20   6 46.7504 10.4214   6
  -3 -20   6 66.7806 8.89622  10
  -3  20   5 410.711 21.7618   7
  -3  20   5 421.921 22.6417   6
  -3 -20   5 420.955 19.3584  10
  -3  20   4 669.052 30.2521   7
  -3  20   4 711.316 31.4783   6
  -3  20   3 112.970 14.3381   7
  -3  20   3 98.4095 14.6170   6
  -3  20   2 68.2011 13.0730   7
  -3  20   2 65.6084 14.1788   6
  -3  20   1 3.84363 11.1483   7
  -3  20   1 3.02515 10.9570   6
  -3 -20   1 5.96022 5.58211   9
  -3  20   0-8.38388 11.6363   7
  -3  20  -1 28.5171 11.7567   7
  -3  20  -2 167.013 15.3177   7
  -3  20  -3 92.6457 12.4223   7
  -3  20  -4 5.19275 8.95581   7
   3 -20   5 77.3228 7.51733  11
  -3  21   7 2.09445 6.46719   7
  -3  21   7 1.84075 7.02572   6
  -3 -21   7-1.98231 4.98747  10
  -3  21   6 20.3210 8.09993   7
  -3  21   6 18.0101 8.42934   6
  -3 -21   6 16.0304 6.02166  10
  -3  21   5 140.280 12.7932   7
  -3  21   5 149.022 13.3390   6
  -3 -21   5 148.982 10.7682  10
  -3  21   4 102.824 12.3829   7
  -3  21   4 117.642 13.2425   6
  -3  21   3 906.201 35.7143   7
  -3  21   3 906.103 36.1825   6
  -3  21   2 203.728 16.0221   7
  -3  21   2 191.744 16.4050   6
  -3  21   1 153.768 14.6772   7
  -3  21   0 44.5333 11.2152   7
  -3  21  -1 109.210 12.3622   7
  -3  21  -2 80.5988 11.3252   7
  -3  21  -3 34.9338 9.32267   7
   3 -21   4 37.5408 5.72735  11
  -3  22   6 48.2883 7.14413   7
  -3  22   6 53.2205 7.76205   6
  -3 -22   6 46.8017 5.80711  10
  -3  22   5 225.361 13.6003   7
  -3  22   5 237.108 13.8905   6
  -3 -22   5 230.552 11.4569  10
  -3  22   4 991.733 35.2651   6
  -3  22   4 907.052 34.3787   7
  -3 -22   4 946.064 32.2074  10
  -3  22   3 232.926 15.1240   7
  -3  22   3 243.374 15.6101   6
  -3  22   2 29.0428 9.40271   7
  -3  22   1 10.7116 9.78228   7
  -3  22   0 13.4757 8.33512   7
  -3  22  -1 11.8443 8.33025   7
  -3  22  -2 4.75201 7.36423   7
  -3  22  -3 188.753 11.7861   7
  -3  23   4 187.859 11.1303   7
  -3  23   3 414.504 18.1346   7
  -3 -23   3 417.438 16.1642  10
  -3  23   2 229.417 13.2499   7
  -3  23   1 73.0206 8.85060   7
  -3  23   0 18.7230 7.03418   7
  -3  23  -1 3.81898 6.06874   7
  -4   0  15 248.555 13.2650  12
  -4   0  15 239.707 13.4527  11
  -4   0  14 367.706 19.2586  12
  -4   0  14 404.276 20.4082  11
  -4   0  13 8.95178 8.96258  12
  -4   0  13 15.9239 11.0456  11
  -4   0  12 1.93575 9.15257  12
  -4   0  12-7.49791 11.4812  11
  -4   0  11 1.09739 9.53099  12
  -4   0  11 4.55644 11.4548  11
  -4   0  10 3968.65 123.509  12
   4   0  -9 186.169 65.0986   1
  -4   0   9 140.058 13.8578  12
  -4   0   9 237.528 78.7175   3
  -4   0   8 451.168 94.7751   4
   4   0  -8 394.478 81.3184   1
  -4   0   8 289.423 83.7561   3
   4   0  -7 121.250 53.6879   1
  -4   0   7 87.0042 55.5772   4
  -4   0   7 92.3627 59.1732   3
  -4   0   6 2330.83 177.828   4
   4   0  -6 2309.17 158.738   1
  -4   0   6 2148.24 180.051   3
  -4   0   5 3546.84 217.271   4
  -4   0   5 3674.48 230.761   3
   4   0  -5 3726.52 176.084   5
  -4   0   4 39371.6 1233.86   4
  -4   0   4 39352.1 1244.08   3
   4   0  -4 37356.7 1161.59   5
   4   0  -3 6007.37 224.978  13
  -4   0   3 5808.75 283.086   3
  -4   0   3 5896.09 284.956   4
   4   0  -2 3745.27 172.328  13
  -4   0   2 3645.77 201.466   3
  -4   0   2 3916.00 207.891  14
  -4   0   2 3998.68 219.591   4
   4   0  -1 3120.88 161.390  13
  -4   0   1 3277.91 174.933   3
  -4   0   1 2966.14 185.492  14
   4   0  -1 3341.84 147.832  16
   4   0   0 7556.10 300.767  13
   4   0   0 6891.62 274.277  16
  -4   0   0 7563.72 335.448  14
   4   0   1 4368.27 219.503  13
   4   0   1 4799.15 207.549  16
   4   0   2 737.176 87.0539  13
   4   0   2 878.681 84.9154  16
  -4   0  -2 708.329 99.4690  14
   4   0   3 1829.27 142.079  13
   4   0   3 1818.27 133.868  16
  -4   0  -3 1768.54 166.864  14
   4   0   4 1271.63 125.322  13
   4   0   4 1223.43 119.552  16
  -4   0  -4 1254.13 148.951  14
   4   0   5 23.8864 43.6875  13
   4   0   5 30.4617 39.7879  16
  -4   0  -5-26.5099 51.6256  14
  -4   1  15 100.127 8.82899  12
  -4  -1  15 109.797 9.44000  12
  -4   1  14 15.9855 8.12717  12
  -4  -1  14 6.16174 8.24164  12
  -4   1  14 18.8964 9.95766  11
  -4  -1  14 4.01277 9.33634  11
  -4   1  13 32.7815 10.0706  12
  -4  -1  13 43.9155 10.5180  12
  -4   1  13 35.7899 12.2157  11
  -4  -1  13 51.0703 11.7737  11
  -4   1  12 113.624 13.3101  12
  -4  -1  12 108.333 13.6904  12
  -4   1  12 119.272 15.4426  11
  -4   1  11 123.576 14.2926  12
  -4  -1  11 128.894 14.7868  12
  -4   1  11 137.354 15.6767  11
  -4  -1  11 136.248 11.9521  10
  -4   1  10 674.902 30.6017  12
  -4  -1  10 707.222 30.9763  12
  -4   1  10 673.828 31.0550  11
  -4   1   9 939.129 35.9970  12
  -4  -1   9 846.502 35.5678  12
   4   1  -9 968.172 126.082   1
  -4   1   9 1081.14 137.805   3
  -4  -1   9 929.347 133.544   3
   4  -1  -9 1050.74 128.226   1
   4  -1  -8 195.277 65.6678   1
  -4   1   8 118.692 64.7048   4
  -4   1   8 163.361 66.1549   3
  -4  -1   8 274.518 82.8532   3
   4   1  -8 147.907 63.0962   1
  -4   1   7 2044.65 176.463   4
   4   1  -7 1409.40 137.347   1
  -4   1   7 1670.68 163.776   3
  -4  -1   7 1522.45 156.874   3
   4  -1  -7 1752.85 143.977   1
   4  -1  -6 579.623 78.7503   1
  -4  -1   6 676.543 92.8826   4
  -4   1   6 653.416 99.7760   4
  -4   1   6 480.940 89.5036   3
  -4  -1   6 578.385 95.4773   3
   4   1  -6 596.727 81.4820   1
   4   1  -6 647.349 74.5877   5
  -4  -1   5 2135.21 156.711   4
  -4   1   5 2232.16 171.493   4
   4   1  -5 2137.35 131.179   5
   4  -1  -5 2260.39 143.749   1
  -4   1   5 2109.44 169.957   3
  -4  -1   5 2315.65 178.868   3
  -4  -1   4 22670.0 770.936   4
  -4   1   4 22656.8 788.384   4
  -4   1   4 22024.6 785.945   3
  -4  -1   4 21848.9 787.554   3
   4   1  -4 23178.4 727.654   5
   4  -1  -4 22335.0 705.013   5
  -4   1   3 5979.46 291.939   4
  -4  -1   3 5647.37 274.622   4
  -4   1   3 5839.82 281.829   3
  -4  -1   3 5974.12 286.700   3
   4   1  -2 745.521 65.5157  13
  -4   1   2 812.287 96.3580   4
  -4   1   2 727.121 84.3422   3
  -4  -1   2 618.380 79.7583   3
   4  -1  -2 742.580 62.0235  16
  -4  -1   2 719.279 64.1418  15
  -4   1   2 829.200 89.1145  14
  -4  -1   2 729.755 84.6525  14
   4   1  -1 675.443 68.9560  13
   4  -1  -1 713.740 63.4923  16
  -4   1   1 758.741 79.6201   3
  -4  -1   1 723.111 77.9425   3
  -4  -1   1 698.354 66.2396  15
  -4   1   1 669.031 83.9544  14
  -4  -1   1 780.140 89.7391  14
   4   1   0 709.973 74.7260  13
   4  -1   0 686.463 66.6047  16
   4   1   0 503.562 52.9792  16
  -4  -1   0 533.292 63.4408  15
  -4   1   0 586.349 83.1816  14
  -4  -1   0 657.582 88.0092  14
   4   1   1 185.713 49.9161  13
   4   1   1 213.802 41.8038  16
   4  -1   1 198.079 43.0984  16
  -4  -1  -1 249.374 51.5435  15
  -4   1  -1 150.337 53.2267  14
  -4  -1  -1 272.574 67.0396  14
   4   1   2 3250.08 188.334  13
   4  -1   2 3086.10 188.136  13
   4   1   2 3271.94 174.303  16
   4  -1   2 3528.90 184.280  16
  -4  -1  -2 3244.59 194.086  15
  -4   1  -2 2808.21 205.223  14
  -4  -1  -2 3326.70 222.084  14
   4   1   3 2250.65 162.446  13
   4  -1   3 2567.23 172.644  13
   4   1   3 2268.18 153.518  16
   4  -1   3 2330.55 157.539  16
  -4  -1  -3 2505.28 179.251  15
  -4   1  -3 2428.91 195.720  14
  -4  -1  -3 2325.40 193.776  14
   4   1   4 1063.85 115.936  13
   4  -1   4 1149.13 120.799  13
   4   1   4 1096.42 114.657  16
   4  -1   4 1161.33 116.987  16
  -4  -1  -4 1281.11 137.286  15
  -4   1  -4 981.472 131.563  14
  -4  -1  -4 1157.83 146.832  14
   4   1   5 341.875 70.6724  13
   4  -1   5 361.187 74.7627  13
   4   1   5 350.531 76.6130  16
   4  -1   5 349.571 73.4771  16
  -4   1  -5 327.556 82.8721  14
  -4  -1  -5 293.601 82.8643  14
  -4   2  15 45.0191 6.97832  12
  -4  -2  15 45.7123 7.61689  12
  -4   2  14 183.214 12.9983  12
  -4  -2  14 178.719 13.4533  12
  -4   2  14 183.956 14.9507  11
  -4   2  13 189.594 14.8960  12
  -4  -2  13 207.773 15.6007  12
  -4   2  13 205.334 17.2375  11
  -4   2  12 115.299 13.2459  12
  -4  -2  12 119.648 13.7366  12
  -4   2  12 130.667 15.5241  11
  -4  -2  12 110.572 11.0408  10
  -4   2  11 17.6336 9.75803  12
  -4  -2  11 37.3466 11.2156  12
  -4   2  11 20.4754 12.3656  11
  -4  -2  11 12.2230 7.87083  10
  -4   2  10 131.154 14.1233  12
  -4   2  10 147.090 15.8256  11
  -4  -2  10 148.436 12.4944  10
  -4   2   9 773.534 32.8334  12
  -4   2   9 971.110 145.462   4
   4  -2  -9 968.335 124.514   1
  -4   2   9 916.038 130.423   3
  -4  -2   9 996.500 138.876   3
   4   2  -8 633.464 100.714   1
  -4   2   8 698.067 121.323   4
  -4   2   8 505.085 99.9722   3
  -4  -2   8 430.700 97.6994   3
   4  -2  -8 502.472 88.5913   1
  -4   2   7 860.561 121.359   4
   4   2  -7 700.066 100.821   1
  -4   2   7 930.505 122.423   3
  -4  -2   7 898.848 123.590   3
   4  -2  -7 1051.47 109.543   1
   4   2  -7 855.704 95.6846   5
  -4   2   6 4115.93 258.905   4
  -4   2   6 4480.50 263.931   3
  -4  -2   6 4047.42 258.052   3
   4   2  -6 4167.94 210.098   5
   4  -2  -6 3874.62 215.105   1
  -4  -2   5 6544.98 300.927   4
   4  -2  -5 6619.54 282.214   1
  -4   2   5 6723.27 336.085   4
  -4   2   5 6506.73 329.894   3
  -4  -2   5 6666.18 337.125   3
   4   2  -5 6538.76 279.490   5
  -4   2   4 18889.2 686.143   4
   4  -2  -4 18611.1 613.465   1
  -4   2   4 18489.7 678.329   3
  -4  -2   4 18249.2 681.838   3
   4   2  -4 17332.0 619.064   5
  -4  -2   4 19873.8 620.262  15
  -4  -2   4 18751.7 649.919   4
  -4   2   3 6207.30 305.500   4
  -4   2   3 6663.95 302.686   3
  -4  -2   3 5829.09 291.288   3
  -4  -2   3 6173.45 252.051  15
  -4   2   3 6220.08 284.517   2
  -4  -2   3 6162.66 280.009   4
   4   2  -2 5425.36 215.233  13
  -4   2   2 5159.82 254.089   3
  -4  -2   2 4996.70 250.290   3
   4  -2  -2 5563.98 220.805  16
  -4  -2   2 5274.19 224.727  15
  -4   2   2 5162.68 267.177   2
  -4   2   2 4889.66 249.422  14
  -4  -2   2 4958.29 246.255  14
  -4   2   2 5368.22 275.411   4
   4   2  -1 503.378 59.1991  13
  -4  -2   1 524.599 75.2990  14
  -4  -2   1 514.268 66.2129   3
   4  -2  -1 492.832 57.3101  16
  -4   2   1 615.143 81.3262  14
  -4   2   1 624.278 93.1894   2
  -4  -2   1 525.441 62.6305  15
   4   2   0 2170.25 134.408  13
   4  -2   0 2046.43 126.028  16
  -4  -2   0 2210.57 139.905  15
  -4   2   0 2334.32 162.821  14
  -4  -2   0 2169.83 159.701  14
   4   2   1 1397.09 110.681  13
   4  -2   1 1082.00 94.3756  16
   4   2   1 1076.40 85.6198  16
  -4  -2  -1 1306.72 112.508  15
  -4   2  -1 1181.50 120.395  14
  -4  -2  -1 1430.46 133.080  14
   4   2   2 14547.5 529.902  13
   4   2   2 14607.1 507.922  16
   4  -2   2 14006.3 516.642  16
  -4  -2  -2 15051.7 554.335  15
  -4   2  -2 14293.3 571.160  14
  -4  -2  -2 13457.8 572.297  14
   4   2   3 1449.12 125.983  13
   4  -2   3 1467.15 129.968  13
   4   2   3 1319.60 113.715  16
   4  -2   3 1355.79 118.409  16
  -4  -2  -3 1289.57 132.211  15
  -4   2  -3 1339.72 142.394  14
  -4  -2  -3 1391.94 151.795  14
   4   2   4 1421.82 131.820  13
   4  -2   4 1390.14 130.895  13
   4   2   4 1360.20 128.325  16
   4  -2   4 1465.46 132.639  16
  -4  -2  -4 1461.92 150.206  15
  -4   2  -4 1552.44 162.343  14
  -4  -2  -4 1561.84 167.861  14
   4   2   5 866.654 105.967  13
   4  -2   5 745.223 103.344  13
   4   2   5 544.255 90.9683  16
   4  -2   5 754.497 104.708  16
  -4  -2  -5 800.532 122.024  15
  -4   2  -5 670.835 116.653  14
  -4  -2  -5 694.750 124.711  14
  -4   3  15 60.5735 7.34084  12
  -4  -3  15 66.5115 8.18006  12
  -4   3  14 97.8604 10.0436  12
  -4  -3  14 99.7246 11.1530  12
  -4   3  14 103.727 12.6974  11
  -4   3  13 47.0037 9.87702  12
  -4  -3  13 72.6505 11.7007  12
  -4   3  13 60.3697 13.2345  11
  -4   3  12 27.3399 9.86258  12
  -4  -3  12 45.3880 11.5179  12
  -4   3  12 20.6455 12.6884  11
  -4  -3  12 25.4650 9.30538  10
  -4   3  11 139.712 14.1068  12
  -4  -3  11 127.771 14.7094  12
  -4   3  11 125.551 16.3554  11
  -4  -3  11 141.035 12.0855  10
  -4   3  10 1059.80 40.9354  12
  -4   3  10 985.960 41.8308  11
  -4  -3  10 1108.08 38.9831  10
  -4   3   9 388.086 20.5286  12
  -4   3   9 489.700 111.951   4
  -4   3   9 351.969 21.3965  11
   4  -3  -9 414.167 92.3712   1
  -4   3   8 109.311 70.9086   4
   4  -3  -8 144.645 60.0372   1
   4   3  -8 153.101 63.3571   1
  -4   3   8 174.920 74.1157   3
  -4  -3   8 73.5927 57.7442   3
   4   3  -8 194.796 66.9363   5
  -4   3   7 366.551 87.4453   4
  -4   3   7 414.779 89.9125   3
  -4  -3   7 395.177 92.6412   3
   4  -3  -7 297.442 68.2374   1
   4   3  -7 423.841 76.0173   5
  -4   3   6 3456.42 235.655   4
  -4   3   6 2999.06 214.084   3
  -4  -3   6 2862.94 217.400   3
   4  -3  -6 2748.76 172.288   1
   4   3  -6 2966.78 176.442   5
  -4   3   5 6263.22 326.824   4
  -4   3   5 5940.48 312.781   3
  -4  -3   5 5985.58 322.408   3
   4   3  -5 5997.73 269.103   5
   4  -3  -5 5951.15 261.529   1
  -4   3   4 22465.8 817.225   4
  -4   3   4 24002.3 815.099   3
  -4  -3   4 23914.9 825.183   3
   4   3  -4 22536.9 755.894   5
  -4  -3   4 22647.2 750.016  15
  -4   3   3 18305.0 680.142   4
  -4   3   3 18551.5 664.162   3
  -4  -3   3 18497.3 670.133   3
  -4  -3   3 17878.5 614.867  15
  -4   3   3 19148.8 661.668   2
   4   3  -2 5975.56 237.378  13
  -4  -3   2 5827.65 271.047  14
  -4   3   2 5902.68 302.225   4
  -4  -3   2 5994.30 283.632   3
  -4  -3   2 6383.81 263.691  15
  -4   3   2 5868.12 297.329   2
   4   3  -1 787.924 71.9148  13
  -4   3   1 698.213 100.025   2
  -4  -3   1 704.366 83.8268  14
   4  -3  -1 673.087 70.6682  16
  -4  -3   1 601.683 73.1842   3
  -4  -3   1 760.117 79.3381  15
  -4   3   1 704.631 87.5206  14
   4   3   0 2158.56 133.521  13
   4  -3   0 1934.70 128.361  16
  -4   3   0 2254.64 184.676   2
  -4  -3   0 2272.30 146.274  15
  -4   3   0 2026.69 155.491  14
  -4  -3   0 2229.00 161.653  14
   4   3   1 1697.05 126.122  13
   4  -3   1 1780.15 126.051  16
  -4  -3  -1 1975.49 144.161  15
  -4   3  -1 1760.95 147.534  14
  -4  -3  -1 1882.08 155.884  14
   4   3   2 4094.65 217.278  13
   4  -3   2 4000.22 212.148  16
  -4  -3  -2 4453.42 243.549  15
  -4   3  -2 3578.01 234.550  14
  -4  -3  -2 3872.42 249.376  14
   4   3   3 74.1088 42.8803  13
   4   3   3 87.2994 40.1261  16
   4  -3   3 2.38863 36.9600  16
  -4  -3  -3 72.6192 49.9411  15
  -4   3  -3 55.6411 48.4988  14
  -4  -3  -3 14.7288 52.1380  14
   4   3   4 156.453 57.0117  13
   4  -3   4 71.5956 52.0200  13
   4   3   4 53.3083 45.5336  16
   4  -3   4 88.1348 51.9751  16
  -4  -3  -4 53.4711 53.3751  15
  -4   3  -4 92.9899 60.8164  14
  -4  -3  -4 146.463 74.7575  14
   4   3   5 398.426 84.2166  16
  -4  -3  -5 621.737 111.589  15
  -4   3  -5 564.625 105.951  14
   4  -3   8 741.966 30.0080  11
  -4   4  15 24.0727 5.70558  12
  -4  -4  15 29.3676 6.72043  12
  -4   4  14 38.2564 7.68948  12
  -4  -4  14 29.3220 8.94527  12
  -4   4  14 50.8920 11.1998  11
  -4   4  13 89.6375 10.7493  12
  -4  -4  13 91.0136 12.1454  12
  -4   4  13 86.8317 14.4286  11
  -4   4  12 49.2769 10.6843  12
  -4  -4  12 79.1983 12.3706  12
  -4   4  12 70.5027 14.7863  11
  -4  -4  12 51.2413 9.79479  10
  -4   4  11 685.545 30.3322  12
  -4   4  11 696.978 32.8706  11
  -4  -4  11 709.629 28.9273  10
  -4   4  10 403.913 21.7294  12
  -4   4  10 363.971 23.5215  11
  -4  -4  10 425.213 20.3155  10
  -4   4   9 66.8380 11.0945  12
  -4   4   9 62.7946 12.7978  11
  -4  -4   9 92.7587 9.93574  10
  -4   4   8 71.1656 66.8887   4
   4   4  -8 40.5179 46.2871   1
  -4   4   8-0.19407 53.8601   3
   4   4  -8 34.0609 47.4194   5
  -4  -4   8 75.9747 51.4398   3
  -4   4   7 97.6215 64.7455   4
   4  -4  -7 148.107 53.2077   1
  -4   4   7 248.195 72.3989   3
  -4  -4   7 243.992 85.6289   3
   4   4  -7 183.048 58.7128   5
  -4   4   6 1347.38 154.330   4
  -4   4   6 1502.01 151.728   3
  -4  -4   6 1622.91 161.894   3
   4  -4  -6 1298.94 114.090   1
   4   4  -6 1354.39 119.495   5
  -4   4   5 11622.4 487.177   3
  -4  -4   5 10418.2 481.075   3
   4   4  -5 10841.7 429.310   5
  -4   4   4 18291.1 701.535   4
  -4   4   4 19077.0 694.070   3
  -4  -4   4 19341.2 702.302   3
   4   4  -4 17619.0 638.309   5
  -4  -4   4 19280.6 642.535  15
  -4   4   3 1664.29 150.217   4
  -4  -4   3 1508.39 137.050   3
  -4  -4   3 1497.68 114.856  15
  -4   4   3 1697.79 142.324   2
   4   4  -2 2870.81 142.496  13
  -4  -4   2 2869.29 182.169   3
  -4  -4   2 2726.55 162.454  15
  -4   4   2 2965.02 201.019   2
  -4  -4   2 2707.77 165.358  14
  -4   4   2 3250.97 211.199   4
   4   4  -1 365.925 51.4866  13
  -4   4   1 227.087 58.5373  14
  -4   4   1 240.349 69.5574   2
  -4  -4   1 361.963 62.8577   3
   4  -4  -1 290.647 50.8913  16
  -4  -4   1 311.610 56.8967  15
  -4   4   1 303.600 71.7907   4
  -4  -4   1 215.676 54.5873  14
   4   4   0 2913.21 161.150  13
   4  -4   0 2998.81 165.706  16
  -4  -4   0 2975.20 179.739  15
  -4   4   0 2506.24 205.676   2
  -4   4   0 2926.63 187.852  14
  -4  -4   0 2813.87 186.208  14
   4   4   1 252.943 52.2685  13
  -4   4  -1 355.926 90.7665   2
   4  -4   1 280.666 53.8214  16
  -4  -4  -1 270.445 59.0635  15
  -4   4  -1 391.580 73.6894  14
  -4  -4  -1 244.481 69.2239  14
   4   4   2 492.701 71.9726  13
  -4   4  -2 374.110 72.0296  14
   4  -4   2 396.966 66.9779  16
  -4  -4  -2 363.823 73.7632  15
  -4  -4  -2 403.324 84.9359  14
   4   4   3 879.314 101.249  13
   4  -4   3 1051.06 108.823  16
  -4  -4  -3 1075.36 125.200  15
  -4   4  -3 941.149 119.227  14
  -4  -4  -3 1113.29 140.803  14
   4   4   4 1416.24 133.749  13
   4  -4   4 1598.80 141.680  16
  -4  -4  -4 1760.20 172.362  15
  -4   4  -4 1401.32 154.611  14
  -4  -4  -4 1825.86 185.922  14
  -4  -4  -5 1406.65 162.244  15
  -4   4  -5 1285.47 153.736  14
   4  -4   6 187.441 14.5964  11
   4  -4   7 1787.28 59.5615  11
   4  -4   8 479.610 22.5694  11
   4  -4   9 1.40586 8.05114  11
   4  -4  10 41.6780 8.10668  11
  -4  -5  15 91.7199 8.27311  12
  -4   5  14 55.0375 7.97006  12
  -4  -5  14 43.1336 8.83893  12
  -4   5  13 108.889 10.8766  12
  -4  -5  13 93.0726 11.8904  12
  -4   5  13 106.139 14.5788  11
  -4  -5  13 100.554 11.0868  10
  -4   5  12 323.148 21.9884  12
  -4  -5  12 361.583 21.1345  12
  -4   5  12 368.111 23.3507  11
  -4  -5  12 388.926 19.6075  10
  -4   5  11 341.197 19.5941  12
  -4   5  11 314.169 22.2755  11
  -4  -5  11 342.710 18.5156  10
  -4   5  10 154.416 14.3188  12
  -4   5  10 178.418 17.1935  11
  -4  -5  10 156.644 12.9780  10
  -4   5   9 44.4581 10.1425  12
  -4   5   9 67.8031 13.6347  11
  -4  -5   9 42.5380 8.57231  10
   4   5  -8 37.1613 52.0330   1
  -4   5   8 132.669 76.8860   4
   4  -5  -8 56.7899 52.0659   1
  -4  -5   8 140.124 68.9184   3
   4   5  -8 119.155 58.7755   5
  -4   5   7 591.067 109.751   4
  -4  -5   7 494.116 102.946   3
   4   5  -7 406.482 81.2882   5
  -4   5   6 1463.32 159.809   4
  -4  -5   6 1617.32 164.148   3
   4   5  -6 1363.67 123.696   5
  -4   5   5 3144.11 227.999   4
  -4  -5   5 2839.14 214.630   3
   4   5  -5 2909.39 179.977   5
  -4   5   4 11392.2 486.466   4
  -4  -5   4 10804.1 469.955   3
   4   5  -4 10684.2 425.856   5
  -4  -5   4 10872.1 424.623  15
  -4   5   3 3090.18 217.203   4
  -4  -5   3 3381.75 214.650   3
  -4  -5   3 3409.25 191.654  15
  -4   5   3 3887.37 231.905   2
   4   5  -2 4424.92 192.857  13
  -4  -5   2 4466.30 238.739   3
  -4  -5   2 4003.56 217.359  15
  -4  -5   2 4247.29 214.319  14
  -4   5   2 4303.53 259.997   2
  -4   5   2 4277.23 255.911   4
   4   5  -1 1480.08 102.668  13
  -4  -5   1 1378.96 117.166   3
   4  -5  -1 1052.22 98.2227  16
  -4  -5   1 1561.29 124.901  15
  -4   5   1 1363.51 145.727   2
  -4  -5   1 1258.38 113.547  14
  -4   5   1 1344.51 137.525   4
   4   5   0 2082.44 133.671  13
   4  -5   0 2066.77 139.564  16
  -4  -5   0 2103.35 153.381  15
  -4   5   0 2342.89 194.685   2
  -4   5   0 1810.54 148.045  14
  -4  -5   0 2040.28 155.435  14
   4   5   1 3926.50 205.269  13
   4  -5   1 3680.14 204.936  16
  -4  -5  -1 3706.31 225.891  15
  -4   5  -1 4078.55 276.367   2
  -4   5  -1 3656.60 224.467  14
  -4  -5  -1 4099.08 243.333  14
   4   5   2 530.537 78.1550  13
  -4   5  -2 466.511 101.693   2
   4  -5   2 389.782 68.8407  16
  -4  -5  -2 495.073 82.6174  15
  -4   5  -2 580.054 90.5797  14
  -4  -5  -2 574.046 98.6631  14
   4   5   3 2116.42 159.026  13
   4  -5   3 2112.10 160.682  16
  -4  -5  -3 2443.72 193.410  15
  -4   5  -3 1865.38 169.896  14
  -4  -5  -3 2239.60 200.009  14
   4   5   4 429.689 73.6157  13
   4  -5   4 370.487 75.3698  16
  -4  -5  -4 254.551 76.9055  15
  -4   5  -4 269.008 78.2775  14
  -4  -5  -4 182.521 73.4263  14
   4  -5   6 3102.87 96.5453  11
   4  -5   7 163.473 14.3984  11
   4  -5   8 94.2188 11.5423  11
   4  -5   9 39.3587 9.58475  11
   4  -5  10 51.8002 8.21436  11
  -4  -6  15 82.6145 7.52789  12
  -4  -6  14 15.0417 7.33545  12
  -4   6  13 142.502 11.9762  12
  -4  -6  13 148.344 13.1636  12
  -4  -6  13 159.702 12.3240  10
  -4   6  12 101.851 11.8684  12
  -4  -6  12 133.513 13.9229  12
  -4   6  12 129.708 16.7502  11
  -4  -6  12 126.053 12.5814  10
  -4   6  11 549.540 25.6397  12
  -4   6  11 526.802 28.8516  11
  -4  -6  11 560.507 24.9162  10
  -4   6  10 230.419 16.3109  12
  -4   6  10 226.703 19.2452  11
  -4  -6  10 229.805 15.2398  10
  -4   6   9 567.637 26.2713  12
  -4   6   9 551.134 28.4258  11
  -4  -6   9 582.882 24.9561  10
   4   6  -8 623.696 103.500   1
  -4   6   8 653.043 28.2211  12
  -4   6   8 815.078 135.762   4
  -4   6   8 646.694 30.1229  11
  -4  -6   8 714.558 125.718   3
   4   6  -8 736.181 109.573   5
  -4   6   7 101.858 68.7230   4
  -4  -6   7 53.2533 59.8850   3
   4   6  -7 90.8400 51.8210   5
  -4   6   6 2670.36 227.869   4
  -4  -6   6 2846.02 227.119   3
   4   6  -6 2901.44 192.063   5
  -4   6   5 362.931 85.0324   4
   4  -6  -5 472.367 68.3313  17
  -4  -6   5 439.124 91.3831   3
  -4  -6   5 462.138 72.6343  15
   4   6  -5 369.374 68.4063   5
  -4   6   4 4557.92 278.907   4
   4  -6  -4 4388.26 215.245  17
  -4  -6   4 4435.12 266.830   3
   4   6  -4 4587.75 238.310   5
  -4  -6   4 4396.75 233.468  15
  -4   6   3 1007.91 123.852   4
  -4   6   3 845.424 113.312   2
   4  -6  -3 837.792 81.3625  17
  -4  -6   3 812.981 106.027   3
  -4  -6   3 997.767 101.268  15
   4  -6  -2 204.490 42.5248  17
   4   6  -2 204.769 41.5761  13
  -4   6   2 211.093 65.6199   4
  -4   6   2 198.516 67.2224   2
  -4  -6   2 291.075 63.6275   3
  -4  -6   2 212.949 53.7424  15
  -4  -6   2 258.179 49.9732  14
   4   6  -1 2978.87 159.719  13
   4  -6  -1 2826.87 156.567  17
   4  -6  -1 2850.25 171.760  16
  -4  -6   1 2960.96 187.167  15
  -4   6   1 2579.36 210.332   2
  -4  -6   1 2843.80 176.023  14
  -4   6   1 2994.38 210.393   4
   4   6   0 1750.95 124.494  13
   4  -6   0 1670.12 128.105  16
  -4  -6   0 1478.33 135.257  15
  -4   6   0 1780.41 175.882   2
  -4   6   0 1706.59 141.528  14
  -4  -6   0 1754.69 143.169  14
   4   6   1 2852.71 171.803  13
   4  -6   1 2779.78 177.630  16
  -4  -6  -1 2841.87 197.416  15
  -4   6  -1 2293.80 214.201   2
  -4   6  -1 2876.35 192.285  14
  -4  -6  -1 3215.65 211.750  14
   4   6   2 1001.96 103.040  13
  -4   6  -2 992.804 148.417   2
   4  -6   2 1011.06 107.978  16
  -4  -6  -2 943.182 116.996  15
  -4   6  -2 956.032 113.860  14
  -4  -6  -2 920.295 120.952  14
   4   6   3 94.9595 45.7500  13
   4  -6   3 114.692 54.1120  16
  -4  -6  -3 177.109 63.8294  15
  -4   6  -3 81.3710 50.9574  14
  -4  -6  -3 61.3841 59.5511  14
   4   6   4 1084.53 118.888  13
   4  -6   4 949.316 115.266  16
  -4  -6  -4 1141.17 143.844  15
  -4   6  -4 1300.50 144.516  14
  -4  -6  -4 1193.87 155.646  14
  -4   6  -5 1349.05 47.0040   8
   4  -6   6 1766.56 59.2274  11
   4  -6   7 29.2379 11.0091  11
   4  -6   8 152.944 13.2652  11
   4  -6   9 72.9492 10.0480  11
   4  -6  10 26.3686 7.54782  11
  -4  -7  14 67.1421 8.61550  12
  -4  -7  13 461.498 22.1673  12
  -4  -7  13 493.308 21.4206  10
  -4   7  12 976.833 36.4123  12
  -4  -7  12 991.992 38.2787  12
  -4  -7  12 979.007 36.5882  10
  -4   7  11 1100.85 40.7776  12
  -4  -7  11 1083.00 42.0921  12
  -4   7  11 1049.61 44.3175  11
  -4  -7  11 1142.29 40.8388  10
  -4   7  10 682.944 28.9469  12
  -4   7  10 645.370 32.2371  11
  -4  -7  10 669.007 28.3896  10
  -4   7   9 157.202 13.4742  12
  -4   7   9 145.010 16.8394  11
  -4  -7   9 154.003 12.9563  10
  -4   7   8 691.310 28.9040  12
  -4   7   8 633.315 31.1063  11
  -4  -7   8 699.972 27.8833  10
  -4   7   7 624.758 117.544   4
  -4  -7   7 558.749 108.974   3
   4   7  -7 409.818 82.7920   5
  -4   7   6 336.382 91.7693   4
  -4  -7   6 418.725 93.1077   3
   4   7  -6 308.978 71.6781   5
  -4   7   5 1620.54 170.854   4
  -4  -7   5 1555.06 163.777   3
   4  -7  -5 1588.49 128.814  17
   4   7  -5 1612.23 138.715   5
  -4  -7   5 1899.53 150.171  15
  -4   7   4 150.465 65.1881   4
  -4  -7   4 99.7732 59.5849   3
  -4  -7   4 89.5808 43.5540  15
   4  -7  -4 87.5596 36.1283  17
   4   7  -4 104.738 45.8254   5
  -4   7   3 3563.46 241.116   2
  -4   7   3 2894.61 219.070   4
  -4  -7   3 2937.39 210.062   3
   4  -7  -3 2839.41 170.252  17
   4   7  -3 3443.59 204.047   5
  -4  -7   3 3344.31 201.515  15
   4   7  -2 443.025 59.3482  13
  -4   7   2 547.756 95.4411   4
  -4   7   2 507.718 94.6626   2
   4  -7  -2 513.642 67.0351  17
  -4  -7   2 484.956 82.4628   3
  -4  -7   2 513.259 79.1050  15
   4   7  -1 400.230 59.7385  13
  -4   7   1 371.223 94.8725   2
   4  -7  -1 371.836 57.0125  17
  -4  -7   1 446.667 76.1323  15
  -4   7   1 489.296 89.3706   4
   4   7   0 1685.57 122.725  13
  -4   7   0 1091.19 149.577   2
   4  -7   0 1211.14 105.669  17
   4  -7   0 1349.57 120.035  16
  -4  -7   0 1482.69 138.389  15
  -4  -7   0 1376.18 127.437  14
   4   7   1 1748.40 133.503  13
   4  -7   1 1469.27 121.787  17
   4  -7   1 1584.06 133.774  16
  -4  -7  -1 1535.69 148.392  15
  -4   7  -1 1853.52 193.974   2
  -4   7  -1 1766.80 146.788  14
  -4  -7  -1 1657.23 150.653  14
   4   7   2 5702.61 280.244  13
   4  -7   2 5206.99 278.159  16
  -4  -7  -2 5650.43 316.305  15
  -4   7  -2 5900.17 369.563   2
  -4   7  -2 5341.99 291.066  14
  -4  -7  -2 5411.25 315.521  14
   4   7   3 30.0325 42.6355  13
  -4   7  -3 16.9816 67.5978   2
   4  -7   3 22.2378 41.5286  16
  -4  -7  -3-18.1522 53.6383  15
  -4  -7  -3-136.965 70.2385  14
  -4   7  -5 2421.12 77.6062   8
   4  -7   7 333.716 19.3122  11
   4  -7   8 29.4903 10.2391  11
   4  -7   9 1.32551 8.80113  11
   4  -7  10 97.4033 9.32115  11
  -4  -8  14 14.8654 6.58004  12
  -4  -8  13 173.163 13.1377  12
  -4  -8  13 183.721 12.6381  10
  -4  -8  12 332.693 19.0720  12
  -4  -8  12 368.791 18.8621  10
  -4   8  11 348.453 18.5678  12
  -4  -8  11 332.395 19.6845  12
  -4  -8  11 333.860 18.9155  10
  -4   8  10 439.679 21.7436  12
  -4  -8  10 412.539 21.2476  10
  -4   8   9 64.6746 11.0236  12
  -4  -8   9 76.9079 10.9376  10
  -4   8   8 0.29084 8.82982  12
  -4  -8   8 8.61282 8.23798  10
  -4   8   7 275.767 86.3928   4
  -4  -8   7 172.678 66.0250   3
   4   8  -7 258.167 76.0874   5
  -4   8   6 570.599 113.900   4
   4  -8  -6 468.205 79.8663  17
  -4  -8   6 764.369 124.455   3
   4   8  -6 700.040 100.250   5
  -4   8   5 995.996 136.563   4
   4  -8  -5 957.641 103.552  17
   4   8  -5 1000.93 113.066   5
  -4  -8   5 1016.06 140.939   3
  -4  -8   5 1007.12 113.981  15
  -4   8   4 270.294 83.1627   4
  -4   8   4 109.727 62.5639   2
   4  -8  -4 320.015 59.6732  17
  -4  -8   4 218.112 70.0637   3
  -4  -8   4 172.715 54.6094  15
   4   8  -4 231.136 63.8782   5
  -4   8   3 238.502 77.9535   4
  -4   8   3 260.656 76.7945   2
   4  -8  -3 290.212 55.0754  17
  -4  -8   3 393.480 82.4434   3
  -4  -8   3 342.037 70.0076  15
   4   8  -3 279.320 66.8373   5
   4   8  -2 74.4128 36.1325  13
  -4   8   2 113.074 59.6347   4
  -4   8   2 78.1403 63.6974   2
   4  -8  -2 16.0275 32.6210  17
  -4  -8   2 127.858 54.8712   3
  -4  -8   2 125.307 53.3599  15
   4   8  -1 1894.78 133.613  13
  -4  -8   1 1750.37 153.758  15
   4  -8  -1 1916.10 138.271  17
  -4   8   1 1962.18 178.113   4
  -4   8   1 2207.60 204.763   2
   4   8   0 449.800 70.8890  13
   4  -8   0 327.189 62.5294  17
   4  -8   0 498.513 78.5118  16
  -4  -8   0 468.635 84.8868  15
   4   8   1 1428.45 125.957  13
  -4   8  -1 1387.42 173.461   2
   4  -8   1 1069.67 107.239  17
   4  -8   1 1173.88 118.814  16
  -4  -8  -1 1416.22 145.189  15
  -4  -8  -1 1397.06 138.682  14
   4   8   2 745.934 98.1092  13
  -4   8  -2 621.549 126.839   2
   4  -8   2 585.163 89.6885  16
  -4  -8  -2 650.221 108.185  15
  -4  -8  -2 917.065 122.625  14
   4   8   3 557.517 88.4835  13
  -4   8  -3 582.087 125.742   2
   4  -8   3 508.269 86.1883  16
  -4  -8  -3 557.546 102.604  15
  -4  -8  -3 464.725 100.305  14
  -4   8  -4 1872.10 65.4001   7
  -4   8  -5 1204.10 43.8437   8
   4  -8   7 2943.39 92.4957  11
   4  -8   8 19.2706 9.95517  11
   4  -8   9 47.6239 9.24857  11
   4  -8  10 13.6975 6.62276  11
  -4  -9  14 95.8650 7.98411  12
  -4  -9  13 103.512 10.4133  12
  -4  -9  13 113.067 10.4299  10
  -4  -9  12 164.075 13.7252  12
  -4  -9  12 184.712 13.3352  10
  -4  -9  11 169.498 13.8517  12
  -4  -9  11 170.785 14.0645  10
  -4  -9  10 410.427 21.1488  10
  -4  -9   9 339.732 18.6075  10
  -4   9   8 536.874 24.8644  12
  -4  -9   8 542.590 24.5250  10
  -4   9   7 471.580 22.7061  12
  -4  -9   7 458.765 21.5969  10
  -4  -9   7 466.225 20.5303   9
  -4   9   6 669.677 125.717   4
   4  -9  -6 750.284 101.918  17
  -4  -9   6 622.844 119.159   3
   4   9  -6 659.822 99.6705   5
  -4   9   5 1250.44 157.083   4
   4  -9  -5 1029.53 112.790  17
   4   9  -5 1195.51 128.542   5
  -4  -9   5 1205.54 154.934   3
  -4  -9   5 1301.05 134.477  15
  -4   9   4 1207.87 147.426   4
  -4   9   4 904.103 137.361   2
   4  -9  -4 933.127 104.883  17
   4   9  -4 1179.72 122.585   5
  -4  -9   4 876.229 129.324   3
  -4  -9   4 898.391 110.478  15
  -4   9   3 1420.26 157.436   4
  -4  -9   3 1319.57 145.048   3
  -4   9   3 1314.68 160.707   2
   4  -9  -3 1258.78 117.397  17
   4   9  -3 1102.69 120.377   5
  -4  -9   3 1251.69 131.159  15
   4   9  -2 106.705 45.8637  13
  -4   9   2 86.4436 60.2568   4
  -4   9   2 47.0591 61.6540   2
   4  -9  -2 81.8006 44.3035  17
  -4  -9   2 105.531 55.5628   3
  -4  -9   2 166.638 59.1955  15
   4   9  -1 4409.40 226.806  13
   4  -9  -1 4035.36 227.251  17
  -4  -9   1 4306.75 259.467  15
  -4   9   1 4303.42 307.532   2
   4   9   0 2770.89 177.320  13
   4  -9   0 2591.50 175.715  17
   4  -9   0 2496.45 179.817  16
  -4  -9   0 2611.84 201.155  15
  -4   9   0 2699.82 245.690   2
   4   9   1 1622.77 138.965  13
  -4   9  -1 1632.64 191.303   2
   4  -9   1 1494.98 133.269  17
   4  -9   1 1514.93 140.232  16
  -4  -9  -1 1535.38 158.943  15
   4   9   2 534.423 84.7849  13
  -4   9  -2 621.954 132.095   2
   4  -9   2 425.309 81.0079  17
   4  -9   2 337.824 73.1772  16
  -4  -9  -2 579.827 100.903  15
  -4   9  -3 937.577 38.2394   7
  -4   9  -4 1402.98 52.5512   7
  -4   9  -6 450.115 21.6697   8
   4  -9   7 65.3192 12.2336  11
   4  -9   8 16.2804 9.14129  11
   4  -9   9 223.655 13.6546  11
   4  -9  10 22.7554 6.58142  11
  -4  -9 -10 20.7118 5.53105   9
  -4 -10  13 414.927 18.0393  12
  -4 -10  13 449.533 18.8858  10
  -4 -10  12 457.489 21.0531  10
  -4 -10  11 11.6253 8.73626  10
  -4 -10  10 497.097 23.5872  10
  -4 -10   9 664.284 28.5975  10
  -4 -10   8 756.767 30.9776  10
  -4 -10   7 1663.76 57.7656  10
  -4 -10   7 1765.08 56.3877   9
   4 -10  -6 22.2592 41.9779  17
  -4 -10   6 82.3073 9.39731   9
  -4  10   5 1303.64 160.255   4
  -4 -10   5 1541.45 174.558   3
   4 -10  -5 1096.74 120.656  17
   4  10  -5 1185.09 128.900   5
  -4 -10   5 1078.03 127.091  15
  -4  10   4 809.417 130.895   4
  -4  10   4 813.954 138.068   2
   4 -10  -4 684.884 94.2932  17
  -4 -10   4 793.988 126.722   3
  -4 -10   4 824.487 110.172  15
   4  10  -4 931.832 113.607   5
  -4  10   3 991.356 133.722   4
  -4  10   3 912.573 144.320   2
   4 -10  -3 754.709 97.0026  17
  -4 -10   3 765.186 122.578   3
  -4 -10   3 713.956 104.891  15
   4  10  -3 639.196 99.9306   5
  -4  10   2 1159.78 144.006   4
  -4  10   2 1035.48 149.620   2
   4 -10  -2 822.502 103.620  17
  -4 -10   2 1169.02 137.546   3
   4  10  -2 987.957 117.710   5
  -4 -10   2 994.533 122.787  15
   4  10  -1 6620.41 315.621  13
   4 -10  -1 6894.99 328.534  17
  -4 -10   1 7024.17 359.572  15
  -4  10   1 7032.20 419.186   2
   4  10   0 1046.78 110.148  13
  -4  10   0 1072.52 164.862   2
   4 -10   0 859.771 105.071  17
   4 -10   0 755.175 101.836  16
  -4 -10   0 784.610 113.626  15
   4  10   1 81.2969 49.4962  13
  -4  10  -1 107.604 70.5545   2
   4 -10   1 95.6133 49.3439  17
   4 -10   1 98.5140 50.2335  16
  -4 -10  -1 117.229 51.1863  15
  -4  10  -2 233.239 17.4213   7
   4 -10   2 289.388 74.8453  17
  -4  10  -3 476.330 25.4680   7
  -4  10  -4 1874.52 66.4739   7
  -4  10  -6 1011.64 37.7106   8
   4 -10   7 66.0808 11.8213  11
   4 -10   8 53.4718 10.0380  11
   4 -10   9-1.60467 7.43076  11
  -4 -10  -9-3.52038 5.91427   9
   4 -10  10 38.5637 6.39835  11
  -4 -11  13 415.711 17.6812  10
  -4 -11  12 364.874 18.0452  10
  -4 -11  11 11.7458 8.91535  10
  -4 -11  10 25.1480 9.93055  10
  -4 -11   9 86.4784 11.9088  10
  -4 -11   8 1141.29 42.3392  10
  -4 -11   7 159.693 13.6348  10
  -4 -11   7 151.395 12.0760   9
  -4 -11   6 488.157 21.7204   9
  -4 -11   5 866.836 32.2159   9
  -4  11   4 298.511 81.9799   4
  -4  11   4 284.466 100.947   2
  -4 -11   4 288.284 15.5671   9
   4 -11  -4 261.332 62.6138  17
  -4 -11   4 320.906 93.5253   3
  -4 -11   4 323.079 78.5771  15
   4  11  -4 353.047 79.9025   5
  -4  11   3 373.480 93.0544   4
  -4  11   3 382.142 108.556   2
   4 -11  -3 366.362 72.7158  17
  -4 -11   3 216.199 80.7153   3
  -4 -11   3 419.418 84.0974  15
   4  11  -3 382.020 78.6786   5
  -4  11   2 2095.38 221.482   2
   4 -11  -2 1789.96 156.831  17
   4  11  -2 2115.32 175.100   5
  -4 -11   2 2098.32 181.168  15
  -4  11   2 2113.19 193.404   4
   4  11  -1 607.741 90.2783  13
  -4  11   1 859.274 145.804   2
   4 -11  -1 657.347 96.2151  17
   4 -11  -1 579.636 92.0426  16
  -4 -11   1 926.345 120.349  15
   4  11   0 960.978 111.569  13
  -4  11   0 1327.53 182.114   2
  -4 -11   0 997.570 36.8787   9
   4 -11   0 1022.00 117.331  17
   4 -11   0 1021.95 116.968  16
  -4 -11   0 934.536 126.785  15
  -4  11  -1 336.828 20.7014   7
   4 -11   1 380.040 78.2236  17
  -4 -11  -1 346.244 18.1765   9
  -4  11  -2 465.308 24.7981   7
  -4 -11  -2 429.520 21.3044   9
  -4  11  -3 370.755 22.7491   7
  -4 -11  -3 373.782 19.9069   9
  -4  11  -4 221.723 19.1070   7
  -4  11  -6 802.472 31.8824   8
   4 -11   7 79.1170 11.9788  11
   4 -11   8 101.511 11.3375  11
  -4 -11  -8 81.9951 8.94106   9
   4 -11   9 30.6415 7.64736  11
  -4 -11  -9 41.1750 6.10371   9
  -4 -12  13 177.013 10.2993  10
  -4 -12  12 128.861 10.8725  10
  -4 -12  11 73.4441 10.6369  10
  -4 -12  10 42.5820 10.0521  10
  -4  12  10 33.4415 10.1835   6
  -4  12   9 598.079 28.8892   6
  -4 -12   9 640.968 27.4626  10
  -4 -12   8 218.880 16.1655  10
  -4 -12   7 589.477 26.5531  10
  -4 -12   6 264.347 15.5229   9
  -4 -12   5 235.721 14.3611   9
  -4 -12   4 526.681 22.8417   9
  -4 -12   3 323.977 17.2545   9
  -4 -12   3 300.893 90.8934   3
  -4  12   2 1701.32 61.4594   7
  -4 -12   2 1855.91 59.2388   9
   4 -12  -2 1808.30 161.262  17
  -4  12   2 2007.69 194.667   4
  -4  12   1 1602.24 60.2249   7
  -4 -12   1 1676.87 57.6389   9
  -4  12   0 407.475 22.5686   7
  -4 -12   0 391.791 19.8646   9
  -4  12  -1 64.5361 12.3903   7
  -4 -12  -1 85.4872 10.7260   9
  -4  12  -2 14.0552 11.2427   7
  -4 -12  -2 13.5612 8.68744   9
  -4  12  -3 176.467 17.1774   7
  -4 -12  -3 192.447 14.7974   9
  -4  12  -4 215.306 18.5681   7
  -4 -12  -4 215.599 15.4768   9
  -4 -12  -5 509.421 24.0326   9
  -4 -12  -6 146.435 12.7513   9
  -4  12  -6 147.794 12.3805   8
   4 -12   7 12.4477 9.57224  11
  -4 -12  -7 2.94105 7.34160   9
   4 -12   8 115.004 10.9329  11
  -4 -12  -8 75.5642 8.14474   9
   4 -12   9 232.798 12.4275  11
  -4 -12  -9 235.090 10.6949   9
  -4 -13  13 51.6982 6.14019  10
  -4 -13  12 12.8589 6.48911  10
  -4  13  11 153.481 12.8938   6
  -4 -13  11 169.400 12.3811  10
  -4  13  10 390.995 21.4300   6
  -4 -13  10 455.883 21.3377  10
  -4  13   9 372.652 21.4420   6
  -4 -13   9 390.333 20.5874  10
  -4  13   8 648.718 30.6557   6
  -4 -13   8 695.431 29.3330  10
  -4  13   7 1514.98 56.7789   6
  -4 -13   7 1638.35 55.0577  10
  -4  13   6 482.602 25.3964   6
  -4 -13   6 498.614 22.3478   9
  -4  13   5 353.224 21.5449   6
  -4 -13   5 357.475 18.1519   9
  -4  13   4 562.978 27.8847   6
  -4 -13   4 589.498 24.7063   9
  -4  13   3 275.204 18.7044   7
  -4  13   3 256.850 18.5571   6
  -4 -13   3 264.769 15.7583   9
  -4  13   2 422.196 23.1148   7
  -4  13   2 400.848 23.0424   6
  -4 -13   2 436.717 20.6314   9
  -4  13   1 1970.91 68.0507   7
  -4  13   1 1945.73 67.9508   6
  -4 -13   1 1988.91 64.5076   9
  -4  13   0 971.872 39.8399   7
  -4  13   0 954.542 39.6616   6
  -4 -13   0 987.265 36.6063   9
  -4  13  -1 977.522 40.6364   7
  -4 -13  -1 1012.94 37.5258   9
  -4  13  -2 1180.61 47.5456   7
  -4 -13  -2 1259.98 44.3141   9
  -4  13  -3 610.775 30.3735   7
  -4 -13  -3 573.540 25.8451   9
  -4  13  -4 624.068 30.3913   7
  -4 -13  -4 568.469 25.9172   9
  -4 -13  -5 430.874 20.8862   9
  -4  13  -6 97.8835 10.7163   8
  -4 -13  -6 78.4579 10.2406   9
   4 -13   7 5.97920 8.74444  11
  -4 -13  -7-4.86859 6.42464   9
   4 -13   8 28.1788 8.06167  11
  -4 -13  -8 35.0508 6.27058   9
   4 -13   9 201.397 10.6469  11
  -4 -14  12 131.756 9.26259  10
  -4  14  11 227.454 14.1932   6
  -4 -14  11 247.727 13.7833  10
  -4  14  10 196.057 14.6330   6
  -4 -14  10 207.330 13.8520  10
  -4 -14   9 129.621 12.7463  10
  -4  14   9 139.011 14.0730   6
  -4  14   8 29.0785 11.4152   6
  -4 -14   8 31.3939 10.2204  10
  -4  14   7 487.862 25.6044   6
  -4 -14   7 489.823 24.0378  10
  -4  14   6 2.72095 9.99112   6
  -4 -14   6-3.47718 8.48914   9
  -4  14   5 651.667 31.6099   6
  -4 -14   5 731.772 28.6384   9
  -4  14   4 1243.43 49.0413   7
  -4  14   4 1262.07 49.6084   6
  -4  14   3 132.359 14.8285   7
  -4  14   3 157.302 15.6615   6
  -4 -14   3 162.246 12.8693   9
  -4  14   2 2017.10 70.2023   7
  -4  14   2 2013.84 70.3439   6
  -4 -14   2 2090.86 66.7082   9
  -4  14   1 112.722 14.4880   7
  -4  14   1 131.530 14.4551   6
  -4 -14   1 110.022 11.6933   9
  -4  14   0 428.872 24.0567   7
  -4  14   0 394.152 23.4538   6
  -4 -14   0 398.666 20.1994   9
  -4  14  -1 196.315 17.2827   7
  -4 -14  -1 190.798 14.4657   9
  -4  14  -2 188.269 17.6093   7
  -4 -14  -2 201.405 14.6731   9
  -4  14  -3 101.350 14.8382   7
  -4 -14  -3 104.347 11.7140   9
  -4  14  -4 676.654 32.4015   7
  -4 -14  -4 698.269 28.3772   9
  -4 -14  -5 242.622 15.0899   9
  -4  14  -6 61.1197 9.08134   8
  -4 -14  -6 52.6701 8.45029   9
  -4  14  -7 71.3977 7.58667   8
   4 -14   7 98.3647 10.6502  11
  -4 -14  -7 73.3834 7.71556   9
   4 -14   8 25.7795 7.12539  11
  -4 -15  12 144.197 8.55937  10
  -4 -15  11 172.548 10.9527  10
  -4  15  10 201.627 13.9856   6
  -4 -15  10 97.5935 10.6548  10
  -4  15   9 309.184 19.1047   6
  -4 -15   9 331.861 17.5642  10
  -4  15   8 43.2324 11.1160   6
  -4 -15   8 46.1943 10.7145  10
  -4  15   7 401.335 23.4644   6
  -4 -15   7 432.056 22.0638  10
  -4  15   6 132.129 14.4523   6
  -4 -15   6 132.173 12.2238   9
  -4  15   5 858.881 36.6871   7
  -4  15   5 799.996 36.7212   6
  -4 -15   5 933.513 33.6869   9
  -4  15   4 1136.77 45.9812   7
  -4  15   4 1172.98 46.9116   6
  -4  15   3 2270.20 79.8498   7
  -4  15   3 2243.22 80.1814   6
  -4  15   2 116.841 14.5497   7
  -4  15   2 101.352 13.8599   6
  -4  15   1 176.617 16.6293   7
  -4  15   1 154.639 16.0895   6
  -4 -15   1 166.704 13.5345   9
  -4  15   0 764.556 34.8970   7
  -4  15   0 815.631 35.5965   6
  -4 -15   0 772.325 30.9593   9
  -4  15  -1 357.739 23.0325   7
  -4 -15  -1 401.853 19.9343   9
  -4  15  -2 87.9210 14.7882   7
  -4 -15  -2 103.842 11.6426   9
  -4  15  -3 161.052 16.8327   7
  -4 -15  -3 166.133 13.1539   9
  -4  15  -4 101.085 14.4298   7
  -4 -15  -4 114.058 11.2586   9
  -4 -15  -5 449.785 19.7991   9
  -4  15  -6 37.3968 7.99195   8
   4 -15   6 50.0653 9.96320  11
  -4 -15  -6 47.3658 7.14801   9
  -4  15  -7 60.0779 6.76142   8
   4 -15   7 66.4802 8.97082  11
  -4 -15  -7 65.8002 6.23854   9
   4 -15   8-4.94557 5.70149  11
  -4 -16  11 16.7044 5.69043  10
  -4  16  10 26.1680 8.09380   6
  -4 -16  10 22.6856 7.21110  10
  -4  16   9 325.164 18.2772   6
  -4 -16   9 329.691 17.1870  10
  -4  16   8 6.91382 9.50615   6
  -4 -16   8 3.46879 9.06237  10
  -4  16   7 23.9360 9.87657   7
  -4  16   7 42.7877 11.6190   6
  -4 -16   7 32.7780 9.92095  10
  -4  16   6 87.5862 12.5352   7
  -4  16   6 108.911 14.2462   6
  -4  16   5 633.827 30.2492   7
  -4  16   5 648.434 30.9859   6
  -4 -16   5 678.879 27.2255   9
  -4  16   4 37.8638 12.2608   7
  -4  16   4 37.0767 11.9140   6
  -4 -16   4 46.0419 9.43092   9
  -4  16   3 808.210 34.9112   7
  -4  16   3 758.294 34.8852   6
  -4 -16   3 786.008 30.5309   9
  -4  16   2 1413.12 53.6711   7
  -4  16   2 1409.61 53.7961   6
  -4 -16   2 1482.42 49.3012   9
  -4  16   1 127.153 15.5843   7
  -4  16   1 147.114 16.1131   6
  -4 -16   1 158.349 12.6280   9
  -4  16   0 135.861 15.7109   7
  -4 -16   0 153.778 12.8927   9
  -4  16  -1 171.842 16.7377   7
  -4 -16  -1 169.614 13.3120   9
  -4  16  -2 130.614 15.9069   7
  -4 -16  -2 154.645 12.1603   9
  -4  16  -3 61.1334 13.3576   7
  -4 -16  -3 61.8671 9.29553   9
  -4  16  -4 427.613 23.5330   7
  -4 -16  -4 443.060 19.3483   9
  -4 -16  -5 35.9819 7.08183   9
  -4  16  -6 40.0227 7.42466   8
   4 -16   6 54.3375 9.11223  11
  -4 -16  -6 41.3201 5.97629   9
   4 -16   7 22.9862 6.68582  11
  -4  17  10 13.3673 6.49416   6
  -4 -17  10 24.3168 6.40836  10
  -4  17   9 1.79704 7.68410   6
  -4 -17   9 16.8118 7.57212  10
  -4  17   8 107.307 11.9867   6
  -4 -17   8 113.347 11.0789  10
  -4  17   7 580.943 27.1283   7
  -4  17   7 599.037 27.9822   6
  -4  17   6 406.940 21.9029   7
  -4  17   6 418.218 22.8621   6
  -4  17   5 34.2796 11.2198   7
  -4  17   5 27.4463 11.4968   6
  -4 -17   5 25.0284 9.38661   9
  -4  17   4 242.303 18.2559   7
  -4  17   4 222.648 17.8177   6
  -4 -17   4 245.533 15.2216   9
  -4  17   3 250.415 18.8362   7
  -4  17   3 227.313 18.5449   6
  -4 -17   3 260.247 15.5520   9
  -4  17   2 239.844 18.7208   7
  -4  17   2 238.104 18.9801   6
  -4 -17   2 285.336 15.7869   9
  -4  17   1 867.872 37.3749   7
  -4  17   1 818.926 36.8171   6
  -4 -17   1 910.330 32.8738   9
  -4  17   0 429.139 24.2733   7
  -4 -17   0 408.838 19.6605   9
  -4  17  -1 104.557 14.8486   7
  -4 -17  -1 106.956 10.4544   9
  -4  17  -2 161.218 15.7816   7
  -4 -17  -2 150.670 11.4439   9
  -4  17  -3 143.579 15.2054   7
  -4 -17  -3 140.490 10.6035   9
  -4  17  -4 58.3138 11.9433   7
  -4 -17  -4 46.1975 7.33799   9
  -4 -17  -5 197.125 10.5335   9
  -4  17  -5 188.624 12.5500   8
  -4  17  -6-5.55710 5.75467   8
   4 -17   6 2.61280 6.47052  11
   4 -17   7 195.072 9.96655  11
  -4 -18  10 28.2708 5.26062  10
  -4  18   9 83.7178 8.93181   6
  -4 -18   9 75.6272 8.07774  10
  -4  18   8 418.028 20.1036   6
  -4 -18   8 422.470 18.9025  10
  -4  18   7 170.209 13.4588   7
  -4  18   7 217.720 15.3797   6
  -4 -18   7 185.479 13.0322  10
  -4  18   6 517.771 25.0949   7
  -4  18   6 587.803 26.7614   6
  -4 -18   6 591.140 25.0085  10
  -4  18   5 483.117 24.7902   7
  -4  18   5 543.439 26.0089   6
  -4  18   4 41.0564 11.9994   6
  -4 -18   4 61.0158 9.16254   9
  -4  18   3 85.4382 13.3968   7
  -4  18   3 92.7712 13.2794   6
  -4 -18   3 84.4474 9.97960   9
  -4  18   2 399.385 23.4163   7
  -4  18   2 389.429 23.2301   6
  -4 -18   2 439.089 19.3420   9
  -4  18   1 22.0828 11.4677   7
  -4  18   1 17.9802 11.4532   6
  -4 -18   1 40.3203 8.17442   9
  -4  18   0 103.339 14.0099   7
  -4 -18   0 119.103 10.3079   9
  -4  18  -1 143.982 15.5926   7
  -4 -18  -1 134.681 10.3726   9
  -4  18  -2 217.077 16.8979   7
  -4 -18  -2 238.955 12.8244   9
  -4  18  -3 19.7837 10.2190   7
  -4 -18  -3 23.7175 6.44424   9
  -4 -18  -4 63.5835 6.54282   9
  -4  18  -5 30.7937 7.07392   8
   4 -18   5 63.4309 8.13117  11
   4 -18   6 65.9635 6.87351  11
  -4 -19   9 10.6585 4.83364  10
  -4  19   8 120.028 10.0258   6
  -4 -19   8 121.985 9.21422  10
  -4  19   7 101.403 10.0046   7
  -4  19   7 105.163 10.7877   6
  -4 -19   7 122.071 10.1222  10
  -4  19   6 100.994 11.2110   7
  -4  19   6 115.316 11.8421   6
  -4 -19   6 111.252 10.5768  10
  -4  19   5 172.742 13.8568   7
  -4  19   5 189.970 14.7728   6
  -4  19   4 107.237 12.9060   7
  -4  19   4 113.983 12.9079   6
  -4  19   3 156.599 14.7459   7
  -4  19   3 165.278 15.3661   6
  -4 -19   3 162.003 11.4331   9
  -4  19   2 171.900 15.3283   7
  -4  19   2 192.670 16.2089   6
  -4 -19   2 228.579 12.7451   9
  -4  19   1 26.8930 10.7936   7
  -4 -19   1 29.2884 6.92123   9
  -4  19   0 179.196 15.2004   7
  -4 -19   0 137.747 10.0844   9
  -4  19  -1 52.2116 10.9991   7
  -4 -19  -1 70.0274 7.55541   9
  -4  19  -2 3.84606 9.54678   7
  -4 -19  -2 3.72155 5.00624   9
  -4  19  -3 125.438 12.6168   7
  -4  19  -4 9.52594 6.53440   8
  -4  19  -5 45.4491 6.20044   8
   4 -19   5 54.9745 6.60826  11
  -4 -20   8 28.3826 5.33873  10
  -4  20   7 68.3825 8.07730   7
  -4  20   7 97.2291 8.91786   6
  -4 -20   7 90.0610 8.19271  10
  -4  20   6 230.339 13.7447   7
  -4  20   6 259.224 14.7824   6
  -4 -20   6 260.310 13.6064  10
  -4  20   5 44.2153 8.76048   7
  -4  20   5 53.5056 9.84833   6
  -4 -20   5 62.5591 8.87007  10
  -4  20   4 482.264 22.5162   7
  -4  20   4 506.982 23.1758   6
  -4  20   3 9.43122 8.67729   7
  -4  20   3 3.07087 8.74868   6
  -4  20   2 12.4902 9.61326   7
  -4 -20   2 1.92483 5.62549   9
  -4  20   1 108.462 12.1790   7
  -4 -20   1 103.466 8.26236   9
  -4  20   0 116.536 12.2030   7
  -4 -20   0 117.922 8.25185   9
  -4  20  -1 40.9999 9.57510   7
  -4 -20  -1 37.3396 5.56899   9
  -4  20  -2 18.3480 8.44462   7
  -4  20  -3 57.5097 7.68594   8
  -4  20  -4 40.2930 6.12137   8
   4 -20   4 50.0227 6.06874  11
  -4  21   6 53.6335 7.44952   6
  -4 -21   6 41.9795 6.37299  10
  -4  21   5 45.0535 7.75622   7
  -4  21   5 37.8739 7.92081   6
  -4 -21   5 46.7683 7.06738  10
  -4  21   4 137.898 11.2917   7
  -4  21   4 158.135 11.8051   6
  -4  21   3 344.224 17.2831   7
  -4  21   2 47.6976 9.00590   7
  -4  21   1 129.219 11.1885   7
  -4  21   0 207.802 13.2313   7
  -4 -21   0 190.847 9.05756   9
  -4  21   0 167.800 10.6017   8
  -4  21  -1 11.3127 5.97108   8
  -4  21  -1 14.5396 7.54925   7
  -4  21  -2 112.621 9.47812   7
  -4  21  -2 92.1421 7.98365   8
  -4  21  -3 35.9870 5.61018   8
  -4 -22   4 26.2952 5.53885  10
  -4  22   3 28.1350 6.36794   7
  -4  22   2 67.2713 7.86389   7
  -4  22   1 97.4807 8.83549   7
  -4  22   0 98.7495 8.51305   7
  -5   0  15 89.1274 8.31446  12
  -5   0  14-0.25057 7.48260  12
  -5   0  13 2.85349 9.09675  12
  -5   0  12 12.1656 9.72246  12
  -5   0  11 161.818 15.8536  12
  -5   0  10 5.01191 9.74503  12
  -5   0   9 15.3919 10.1693  12
  -5   0   8 312.334 19.1469  12
   5   0  -8 377.277 82.0620   1
   5   0  -7 4736.28 268.202   1
  -5   0   7 5197.05 322.526   3
  -5   0   6 7786.06 388.555   4
   5   0  -6 7372.35 340.228   1
  -5   0   6 7686.77 399.642   3
  -5   0   5 3633.83 247.553   3
  -5   0   5 3462.15 233.824   4
  -5   0   4 5509.46 303.526   3
  -5   0   4 5522.42 302.144   4
  -5   0   3 178.484 59.8291   3
   5   0  -2 102.037 37.5753  13
  -5   0   2 124.453 48.9734   3
  -5   0   2 151.947 52.9201  14
   5   0  -1 36.1190 30.7844  13
  -5   0   1 25.6571 52.7750  14
   5   0   0 1201.09 110.812  13
  -5   0   0 1192.11 132.869  14
   5   0   1-11.9507 45.0851  13
  -5   0  -1 4.89417 48.8233  14
   5   0   2 2449.79 175.193  13
  -5   0  -2 2232.31 202.448  14
  -5   0  -3 857.311 31.9657   8
  -5   1  15 84.6126 7.86519  12
  -5  -1  15 77.6336 7.96738  12
  -5   1  14 36.3474 8.35237  12
  -5  -1  14 33.6250 8.48479  12
  -5   1  13 292.796 17.3482  12
  -5  -1  13 275.934 17.1848  12
  -5   1  12 16.3638 10.2633  12
  -5  -1  12 13.8639 9.74048  12
  -5   1  11 2.92540 9.25394  12
  -5  -1  11-2.48818 9.97141  12
  -5   1  10 307.666 20.1692  12
  -5  -1  10 308.993 20.1901  12
  -5   1   9 877.718 35.4948  12
  -5  -1   9 840.459 35.4796  12
   5  -1  -8 976.494 125.772   1
  -5   1   8 1148.50 43.3031  12
  -5  -1   8 1169.13 43.7052  12
   5   1  -8 1013.84 125.733   1
  -5   1   7 1528.28 170.962   4
   5   1  -7 1425.18 138.659   1
  -5  -1   7 1628.27 175.766   3
  -5   1   7 1271.09 157.639   3
   5   1  -6 531.298 84.6033   1
  -5   1   6 683.398 111.771   4
  -5   1   6 747.327 117.045   3
  -5  -1   6 619.879 109.215   3
  -5   1   5 4489.56 280.949   4
  -5   1   5 4532.94 281.377   3
  -5  -1   5 4559.62 284.142   3
  -5  -1   5 4823.65 272.702   4
  -5   1   4 2434.50 194.807   4
  -5   1   4 2408.44 190.712   3
  -5  -1   4 2379.58 189.178   3
   5   1  -4 2483.12 154.519   5
  -5  -1   4 2803.56 194.201   4
  -5   1   3 191.233 58.2152   3
  -5  -1   3 173.481 58.3239   3
   5   1  -2 189.636 43.9426  13
   5  -1  -2 111.704 37.8021  13
  -5   1   2 58.5449 43.8396   3
  -5  -1   2 133.992 52.8533   3
  -5   1   2 152.771 56.2732  14
  -5  -1   2 45.3308 41.9804  14
   5   1  -1 238.268 50.8546  13
   5  -1  -1 196.465 48.7249  13
  -5   1   1 213.655 64.0260  14
  -5  -1   1 298.625 68.4186  14
   5   1   0 796.716 91.2315  13
   5  -1   0 822.148 95.5953  13
  -5   1   0 798.440 111.617  14
  -5  -1   0 1014.60 123.692  14
   5   1   1 2282.86 162.396  13
   5  -1   1 2291.20 165.320  13
  -5   1  -1 2438.61 198.976  14
  -5  -1  -1 1977.61 183.584  14
   5   1   2 73.4287 48.7005  13
   5  -1   2 224.813 59.8833  13
  -5   1  -2 166.988 64.6406  14
  -5  -1  -2 207.824 75.7928  14
  -5   1  -3 98.0745 10.4445   8
   5  -1   3 25.8675 45.4612  16
  -5   2  15 146.465 9.18970  12
  -5  -2  15 130.926 9.37957  12
  -5   2  14 22.5003 7.86583  12
  -5  -2  14 32.3856 8.40035  12
  -5   2  13 99.1306 11.5030  12
  -5  -2  13 110.260 12.6230  12
  -5   2  12 37.9906 10.5506  12
  -5  -2  12 47.0741 10.9692  12
  -5   2  11 61.0984 11.3674  12
  -5  -2  11 58.6840 12.3679  12
  -5   2  10 362.984 21.7767  12
  -5  -2  10 361.522 21.7711  12
  -5   2   9 39.4773 10.9106  12
  -5  -2   9 36.4232 11.3374  12
  -5   2   8 111.246 12.7310  12
  -5  -2   8 101.503 13.0624  12
  -5   2   7 3161.73 247.790   4
   5   2  -7 2701.06 200.037   1
  -5   2   7 2998.66 236.604   3
  -5  -2   7 2660.51 229.314   3
  -5   2   6 1726.85 193.108   4
  -5   2   6 1898.47 181.288   3
  -5  -2   6 1635.00 172.482   3
  -5   2   5 10757.4 490.788   4
  -5   2   5 10954.2 487.187   3
  -5  -2   5 10085.6 478.484   3
   5   2  -5 10298.5 409.551   5
  -5   2   4 2103.99 177.287   3
  -5  -2   4 2029.43 174.367   3
   5   2  -4 2089.73 144.933   5
  -5   2   4 2197.35 187.012   4
  -5   2   3 356.637 79.1136   4
  -5   2   3 267.844 62.9219   3
  -5  -2   3 335.008 70.1032   3
   5  -2  -2 52.2775 33.5516  13
  -5  -2   2 107.663 47.8504   3
  -5  -2   2 25.1269 37.7620  14
   5   2  -1 629.391 75.7102  13
   5  -2  -1 721.547 81.9933  13
  -5   2   1 817.441 106.715  14
  -5  -2   1 591.597 92.2355  14
   5   2   0 798.464 88.7418  13
   5  -2   0 839.436 94.0544  13
  -5   2   0 552.955 94.9161  14
  -5  -2   0 820.923 114.998  14
   5   2   1 736.690 91.9095  13
   5  -2   1 706.644 96.0610  13
   5  -2   1 860.523 92.0921  16
  -5   2  -1 755.702 112.513  14
  -5  -2  -1 772.388 118.723  14
   5   2   2 455.049 79.2606  13
   5  -2   2 365.254 75.4586  13
   5  -2   2 443.049 73.9748  16
  -5   2  -2 412.537 90.2679  14
  -5  -2  -2 433.854 98.1090  14
   5  -2   3 764.857 100.136  16
  -5   2  -3 799.685 30.9098   8
  -5   2  -4 467.784 21.5551   8
  -5   3  15 60.0265 6.67402  12
  -5  -3  15 68.1857 7.24252  12
  -5  -3  14 126.264 11.0259  12
  -5   3  14 105.671 10.0092  12
  -5   3  13 105.359 11.2569  12
  -5  -3  13 92.1076 11.6180  12
  -5   3  12 131.103 13.6134  12
  -5  -3  12 134.830 14.1931  12
  -5   3  11 87.1218 12.5552  12
  -5  -3  11 104.949 13.5913  12
  -5   3  11 86.5905 14.0104  11
  -5   3  10 82.8733 13.1112  12
  -5  -3  10 80.5360 12.8339  12
  -5   3   9 679.944 29.9282  12
  -5  -3   9 655.147 30.1041  12
  -5   3   8 1270.85 45.7239  12
  -5  -3   8 1202.27 45.4049  12
  -5   3   7 875.835 136.870   4
  -5   3   7 833.241 128.998   3
  -5  -3   7 876.347 132.336   3
   5   3  -7 801.379 108.787   1
  -5   3   6 507.835 104.409   4
  -5   3   6 532.633 105.612   3
  -5  -3   6 403.396 91.7822   3
   5   3  -6 336.934 68.8971   5
  -5   3   5 904.244 128.843   4
  -5   3   5 784.306 120.259   3
  -5  -3   5 853.640 121.581   3
   5   3  -5 941.979 99.6034   5
  -5   3   4 5754.45 311.906   3
  -5  -3   4 4969.21 294.177   3
   5   3  -4 5002.64 255.179   5
  -5   3   4 5193.92 310.562   4
  -5   3   3 139.385 64.4104   4
  -5  -3   3 117.852 52.1715   3
  -5  -3   2 1111.13 117.412  14
   5   3  -1 298.872 54.5514  13
   5  -3  -1 262.952 51.2715  16
  -5   3   1 201.016 62.7460  14
  -5  -3   1 209.687 66.0940  14
   5   3   0 328.654 60.7569  13
   5  -3   0 284.875 57.2907  16
  -5   3   0 185.339 66.6761  14
  -5  -3   0 212.744 72.8441  14
   5   3   1 1017.36 106.521  13
   5  -3   1 896.904 99.2636  16
  -5   3  -1 1067.98 130.412  14
  -5  -3  -1 1011.02 132.924  14
   5   3   2 1369.16 130.706  13
   5  -3   2 1356.70 134.348  13
   5  -3   2 1412.91 129.070  16
  -5   3  -2 1431.72 156.043  14
  -5  -3  -2 1666.63 177.143  14
  -5   3  -3 1129.45 40.5345   8
  -5   3  -4 1068.99 38.8763   8
  -5  -4  15 165.151 9.66259  12
  -5   4  14 73.6546 8.81851  12
  -5  -4  14 100.344 10.0832  12
  -5   4  13 177.722 13.5025  12
  -5  -4  13 182.342 14.4097  12
  -5   4  12 90.1760 12.0096  12
  -5  -4  12 73.3258 12.1403  12
  -5   4  11 721.796 31.3295  12
  -5  -4  11 696.737 31.6045  12
  -5   4  10 121.218 13.6047  12
  -5  -4  10 105.126 13.4189  12
  -5   4   9 176.191 15.3243  12
  -5  -4   9 146.791 14.7996  12
  -5   4   8 21.0061 9.24265  12
  -5  -4   8 11.1942 9.88428  12
  -5   4   7 126.905 68.2481   4
  -5   4   7 105.584 12.0455  12
  -5  -4   7 190.564 74.9368   3
   5   4  -7 64.7261 52.0033   5
  -5   4   6 2588.16 224.906   4
  -5  -4   6 2197.78 205.941   3
   5   4  -6 2356.33 169.384   5
  -5   4   5 321.261 91.6541   4
  -5  -4   5 351.562 89.2167   3
   5   4  -5 285.526 64.2394   5
  -5  -4   4 1697.41 164.269   3
   5   4  -4 1636.12 138.488   5
  -5   4   4 2009.45 186.854   4
  -5   4   3 2.76654 50.1239   4
  -5  -4   3 82.5170 49.1087   3
   5  -4  -2 758.988 82.8741  16
  -5   4   2 912.566 128.169   2
  -5  -4   2 805.230 100.477  14
   5   4  -1 34.8477 36.0920  13
   5  -4  -1 59.0553 39.1636  16
  -5  -4   1 47.5617 43.7904  14
   5   4   0 337.358 63.0133  13
   5  -4   0 227.736 53.9283  16
  -5   4   0 262.255 67.7810  14
  -5  -4   0 176.580 61.9561  14
   5   4   1 108.258 49.0905  13
   5  -4   1 127.344 51.0269  16
  -5   4  -1 189.921 65.5440  14
  -5  -4  -1 112.055 63.3645  14
   5   4   2 239.931 60.1836  13
   5  -4   2 262.097 62.2311  16
  -5   4  -2 284.792 79.1081  14
  -5  -4  -2 468.342 103.171  14
  -5   4  -3 0.78263 8.73110   8
  -5   4  -4 2677.38 84.3679   8
  -5   5  14 236.373 12.8098  12
  -5  -5  14 232.839 13.5593  12
  -5   5  13 40.6003 8.82384  12
  -5  -5  13 43.6220 9.71672  12
  -5   5  12 512.530 23.9239  12
  -5  -5  12 506.047 24.5904  12
  -5  -5  12 492.887 21.4558  10
  -5   5  11 28.4390 10.3172  12
  -5  -5  11 36.7183 11.0343  12
  -5   5  10 395.543 21.5678  12
  -5  -5  10 334.479 21.0474  12
  -5   5   9 788.127 32.6729  12
  -5  -5   9 737.899 32.5280  12
  -5   5   8 412.269 21.8583  12
  -5  -5   8 365.312 21.0842  12
  -5   5   7 1053.94 39.7976  12
  -5   5   7 1180.14 164.784   4
   5   5  -7 875.648 113.205   5
  -5   5   6 600.713 114.815   4
  -5  -5   6 543.344 109.297   3
   5   5  -6 507.105 87.2124   5
  -5   5   5 948.083 138.200   4
  -5  -5   5 839.091 128.729   3
   5   5  -5 863.881 103.257   5
  -5   5   4 129.432 67.7025   4
  -5  -5   4 62.7784 50.9538   3
   5   5  -4 61.9413 46.3562   5
  -5   5   3 118.173 63.7883   4
  -5  -5   3 149.580 59.2425   3
   5  -5  -3 106.153 43.5871  16
  -5  -5   3 118.284 45.9921  15
   5  -5  -2 2378.70 155.605  16
  -5  -5   2 2168.90 159.565  15
  -5   5   2 2406.01 208.528   2
  -5  -5   2 1763.89 149.937  14
   5   5  -1 576.086 75.2209  13
  -5   5   1 621.449 119.632   2
   5  -5  -1 582.682 77.9879  16
  -5  -5   1 600.075 86.3176  15
  -5  -5   1 535.957 91.1814  14
   5   5   0 141.589 48.1951  13
   5  -5   0 140.436 50.1939  16
  -5  -5   0 326.273 74.3245  15
  -5   5   0 191.894 64.3735  14
  -5  -5   0 272.258 73.3561  14
   5   5   1 269.603 63.0356  13
   5  -5   1 288.649 65.5506  16
  -5  -5  -1 299.941 72.0866  15
  -5   5  -1 262.754 71.8024  14
  -5  -5  -1 414.844 95.7918  14
  -5   5  -2 40.9543 9.77002   8
   5   5   2-7.36697 39.8448  13
   5  -5   2 0.13662 38.2485  16
  -5   5  -2-6.00650 40.4792  14
  -5  -5  -2 62.3219 65.9678  14
  -5   5  -3 372.234 19.7334   8
  -5   5  -4 49.1284 10.4827   8
  -5   6  14 74.4879 7.74694  12
  -5  -6  14 86.7121 8.86011  12
  -5   6  13 247.113 14.3513  12
  -5  -6  13 258.791 15.5467  12
  -5  -6  13 245.306 13.2452  10
  -5   6  12 55.8114 10.0713  12
  -5  -6  12 64.7600 10.9346  12
  -5  -6  12 69.8296 8.99073  10
  -5   6  11 58.0120 10.5383  12
  -5  -6  11 59.7190 11.2260  12
  -5  -6  11 56.6613 8.96805  10
  -5   6  10 339.525 20.3199  12
  -5  -6  10 380.794 21.5292  12
  -5   6   9 355.095 19.9976  12
  -5  -6   9 313.184 19.8047  12
  -5   6   8 669.023 29.5411  12
  -5   6   7 1396.12 49.9412  12
  -5   6   6 388.631 20.4116  12
  -5   6   6 350.173 95.1316   4
  -5  -6   6 239.702 86.2652   3
   5   6  -6 340.255 73.4453   5
  -5   6   5 1825.01 191.383   4
  -5  -6   5 1939.68 194.994   3
   5   6  -5 1773.81 152.607   5
  -5   6   4 536.223 109.332   4
  -5  -6   4 468.615 99.3764   3
  -5  -6   4 439.833 77.7488  15
   5   6  -4 457.448 82.0730   5
  -5   6   3 561.709 104.574   4
  -5  -6   3 517.447 98.4918   3
  -5  -6   3 422.783 73.2017  15
  -5   6   2 1086.26 149.225   2
   5  -6  -2 852.853 97.1992  16
  -5  -6   2 907.242 106.984  15
   5   6  -1 1484.75 120.235  13
  -5   6   1 1509.20 179.121   2
   5  -6  -1 1631.61 132.633  16
  -5  -6   1 1376.08 138.109  15
  -5  -6   1 1274.86 133.779  14
   5   6   0 149.841 51.9924  13
  -5   6   0 157.034 84.3483   2
   5  -6   0 110.398 48.1737  16
  -5  -6   0 187.508 61.9544  15
  -5  -6   0 228.023 72.1219  14
   5   6   1 817.217 98.9917  13
  -5   6  -1 1013.11 36.0961  12
   5  -6   1 826.193 102.158  16
  -5  -6  -1 974.609 124.846  15
  -5   6  -1 884.590 35.9038   8
  -5   6  -1 909.644 117.482  14
  -5  -6  -1 920.046 129.200  14
  -5  -6  -2 208.129 13.0787   8
  -5  -6  -2 153.727 74.9304  15
  -5   6  -2 234.321 15.9633   8
  -5   6  -3 369.682 20.2126   8
  -5   6  -4 529.291 24.8108   8
  -5   6  -5 761.424 30.5094   8
  -5  -7  14 392.263 16.7829  12
  -5   7  13 405.031 18.0078  12
  -5  -7  13 400.853 18.9593  12
  -5  -7  13 399.630 17.3021  10
  -5  -7  12 131.301 12.7204  12
  -5  -7  12 137.664 11.3670  10
  -5   7  11 13.1119 8.54411  12
  -5  -7  11 18.6969 9.55644  12
  -5  -7  11 16.5590 8.07146  10
  -5   7  10 98.9137 11.9407  12
  -5  -7  10 103.078 12.6307  12
  -5  -7  10 112.851 10.7438  10
  -5   7   9 343.824 19.9544  12
  -5   7   8 150.134 13.8900  12
  -5   7   7 2474.13 80.3882  12
  -5   7   6 1024.24 39.2223  12
  -5  -7   6 1036.70 36.0447   9
  -5   7   5 1830.07 193.896   4
  -5  -7   5 1472.84 175.815   3
   5   7  -5 1493.40 142.270   5
  -5  -7   5 1651.04 148.918  15
  -5   7   4 295.921 87.8357   4
  -5  -7   4 117.675 72.7368   3
  -5  -7   4 201.144 56.2493  15
   5   7  -4 310.327 71.2092   5
  -5   7   3 383.932 95.9621   4
  -5  -7   3 552.138 110.405   3
  -5  -7   3 461.368 81.7114  15
   5   7  -3 371.584 78.8742   5
  -5   7   2 1571.44 183.750   2
   5  -7  -2 1408.23 130.944  16
  -5  -7   2 1563.58 146.617  15
   5   7  -1 1238.91 112.378  13
  -5   7   1 1207.25 171.931   2
   5  -7  -1 1126.28 118.032  16
  -5  -7   1 1371.18 140.632  15
   5   7   0 1221.67 117.407  13
  -5   7   0 1365.12 185.615   2
  -5  -7   0 990.502 126.689  15
   5  -7   0 1259.28 122.616  16
   5   7   1 791.960 98.4591  13
   5  -7   1 676.353 96.7907  16
  -5  -7  -1 584.667 23.0148   8
  -5  -7  -1 526.069 100.187  15
  -5   7  -1 514.695 25.2594   8
  -5  -7  -1 537.269 106.337  14
  -5   7  -2 41.9830 10.8294   8
  -5  -7  -2 33.0564 7.99592   8
  -5   7  -3 87.0843 12.6280   8
  -5   7  -4 2409.32 78.0789   8
  -5   7  -5 1705.41 57.2823   8
   5  -7   6 450.197 21.0743  11
   5  -7   7 155.425 11.8782  11
   5  -7   8 17.2654 6.62796  11
  -5  -8  13 137.661 10.8675  12
  -5  -8  13 169.870 10.4724  10
  -5   8  12 138.655 11.3447  12
  -5  -8  12 118.429 11.7564  12
  -5  -8  12 125.729 10.5995  10
  -5   8  11 9.55878 8.40535  12
  -5  -8  11 2.21598 8.21415  12
  -5  -8  11 6.67572 7.17564  10
  -5   8  10 153.831 13.4236  12
  -5  -8  10 143.257 11.8280  10
  -5   8   9 10.2061 9.04530  12
  -5  -8   9 15.3580 8.39889  10
  -5   8   8 645.540 27.6853  12
  -5  -8   8 577.808 25.2413  10
  -5   8   7 2210.72 72.7446  12
  -5  -8   7 2204.86 69.4403   9
  -5   8   6 479.699 23.4580  12
  -5  -8   6 476.461 20.6077   9
  -5   8   5 765.640 30.8737  12
  -5  -8   5 746.742 28.2562   9
  -5  -8   5 592.205 115.966   3
  -5  -8   5 625.899 97.6122  15
  -5   8   4 33.8335 50.6843   4
  -5   8   4 61.9743 10.1711  12
  -5  -8   4 53.6999 63.1637   3
  -5  -8   4 101.294 46.3794  15
   5   8  -4 4.00378 43.7637   5
  -5   8   3 303.456 86.9700   4
  -5  -8   3 331.212 73.3763  15
   5   8  -3 325.498 76.2073   5
  -5   8   2 147.565 84.0511   2
   5  -8  -2 56.5040 42.8782  16
  -5  -8   2 74.3281 57.8731  15
  -5   8   1 169.579 13.3779  12
  -5   8   1 196.677 78.8571   2
   5  -8  -1 190.918 59.7251  16
  -5  -8   1 188.814 12.1743   8
  -5  -8   1 100.826 46.0563  15
  -5   8   1 163.512 14.2850   8
   5   8   0 12.0917 39.0579  13
  -5   8   0 24.6347 9.84732   8
  -5   8   0 78.5542 11.4106  12
  -5   8   0 82.2653 66.5124   2
  -5  -8   0 22.9345 8.57750   9
   5  -8   0 33.5280 40.5467  16
  -5  -8   0 48.6183 49.1423  15
  -5  -8   0 45.2335 8.09656   8
  -5   8  -1 85.4648 12.4369   8
  -5  -8  -1 70.4104 10.5628   9
  -5  -8  -1 86.8394 9.46327   8
  -5   8  -2 102.182 12.9876   8
  -5   8  -3 1259.53 46.2313   8
  -5   8  -4 4392.41 134.197   8
  -5   8  -5 388.845 20.1524   8
   5  -8   6 72.2656 10.3717  11
   5  -8   7 6.14123 7.36134  11
   5  -8   8 8.20555 6.50603  11
  -5  -8  -9 25.8646 5.89561   9
  -5  -9  13 150.753 9.80814  10
  -5  -9  12 87.7093 9.29634  10
  -5   9  11 97.5913 10.4810  12
  -5  -9  11 98.9443 10.2397  10
  -5   9  10 73.9241 10.7833  12
  -5  -9  10 62.3996 9.38382  10
  -5   9   9 387.985 20.3364  12
  -5  -9   9 347.058 18.5818  10
  -5   9   8 421.377 21.4314  12
  -5  -9   8 379.320 19.7877  10
  -5   9   7 13.1392 9.44803  12
  -5  -9   7 7.43898 7.74843  10
  -5  -9   7 14.3082 7.80780   9
  -5   9   6 359.731 19.9015  12
  -5  -9   6 363.428 17.6759   9
  -5   9   5 154.659 13.4698  12
  -5  -9   5 147.407 11.7338   9
  -5   9   4 428.798 21.4227  12
  -5  -9   4 415.404 19.6248   9
  -5  -9   4 429.746 99.0237   3
  -5  -9   4 400.592 83.3340  15
  -5   9   3 100.407 11.7570   8
  -5   9   3 66.7851 10.5163  12
  -5  -9   3 87.7930 10.1070   9
  -5  -9   3 120.772 60.7771  15
  -5   9   2 2020.66 64.2567  12
  -5  -9   2 1824.09 62.9185   9
   5  -9  -2 1817.25 156.241  16
  -5  -9   2 2117.24 62.6745   8
  -5  -9   2 1837.78 173.247  15
  -5   9   2 2068.41 224.065   2
  -5   9   2 1827.67 64.7913   8
  -5   9   1 1077.87 38.7352  12
  -5  -9   1 967.151 37.7517   9
  -5  -9   1 1152.38 37.1740   8
  -5  -9   1 972.194 128.589  15
  -5   9   1 944.612 39.4689   8
  -5   9   0 125.709 13.3710   8
  -5   9   0 179.522 14.4497  12
  -5  -9   0 142.163 12.9816   9
  -5  -9   0 169.480 12.1984   8
  -5  -9  -1 194.763 14.8012   9
  -5  -9  -1 222.907 13.3306   8
  -5   9  -1 179.717 15.5187   8
  -5  -9  -2 175.980 14.6729   9
  -5   9  -2 208.724 16.1343   8
  -5   9  -3 119.256 14.5957   8
  -5   9  -4 308.088 19.4033   8
  -5   9  -5 460.739 22.4881   8
   5  -9   6 47.4468 9.69821  11
   5  -9   7 59.6412 8.92281  11
   5  -9   8 32.1495 6.85709  11
  -5  -9  -8 33.9148 7.51687   9
  -5  -9  -9 12.8799 4.88695   9
  -5 -10  13 125.752 8.63250  10
  -5 -10  12 104.264 9.51611  10
  -5 -10  11 68.4069 9.31623  10
  -5  10  10 110.970 10.9578  12
  -5 -10  10 120.051 11.3498  10
  -5  10   9 124.557 12.0907  12
  -5 -10   9 121.559 11.8681  10
  -5  10   8 79.1182 10.7173  12
  -5 -10   8 69.9746 10.4124  10
  -5  10   7 6.88995 9.03841  12
  -5 -10   7 8.23351 7.84491  10
  -5 -10   7 0.88208 7.33836   9
  -5  10   6 159.654 13.6811  12
  -5 -10   6 158.123 11.8635   9
  -5  10   5 5.99102 10.3983  12
  -5 -10   5 18.0298 7.61545   9
  -5  10   4 644.782 27.5720  12
  -5 -10   4 634.996 26.1704   9
  -5  10   3 1958.72 62.6123  12
  -5 -10   3 1877.11 61.2952   9
  -5  10   3 1779.19 61.9942   8
  -5  10   2 425.197 20.6652  12
  -5 -10   2 355.064 19.1744   9
  -5  10   2 377.205 21.4191   8
  -5 -10   1 647.199 28.0920   9
  -5  10   1 661.263 30.2387   8
  -5 -10   0 113.227 12.0836   9
  -5 -10  -1 339.302 18.8894   9
  -5 -10  -2 283.330 17.9000   9
  -5  10  -2 302.850 19.5613   8
  -5 -10  -3 554.083 25.9588   9
  -5  10  -3 574.207 27.3600   8
  -5  10  -4 148.476 14.9204   8
  -5 -10  -4 157.984 14.6727   9
  -5  10  -5 102.161 12.0203   8
   5 -10   6 145.005 12.1889  11
  -5 -10  -6 116.124 12.9057   9
  -5  10  -6 145.919 11.0210   8
   5 -10   7 70.5444 8.90786  11
  -5 -10  -7 46.6243 8.73656   9
   5 -10   8 13.3215 5.97435  11
  -5 -10  -8 19.5289 6.49733   9
  -5 -11  13 168.579 9.25499  10
  -5 -11  12 492.652 20.0340  10
  -5 -11  11 184.187 12.3846  10
  -5 -11  10 16.1107 8.41135  10
  -5 -11   9 37.8121 9.22337  10
  -5  11   8 369.004 19.3055  12
  -5 -11   8 370.469 19.3699  10
  -5  11   7 319.740 17.9363  12
  -5 -11   7 326.283 17.9878  10
  -5 -11   7 302.629 16.6060   9
  -5  11   6 603.021 26.7505  12
  -5 -11   6 631.767 25.6726   9
  -5  11   5 99.7338 12.0526  12
  -5 -11   5 97.2831 10.6509   9
  -5  11   4 1614.04 53.6869  12
  -5 -11   4 1507.19 52.1024   9
  -5  11   3 14.1336 9.52719   8
  -5  11   3 22.9368 10.1735  12
  -5 -11   3 20.6799 8.79761   9
  -5  11   2 910.897 34.2729  12
  -5 -11   2 874.602 33.5776   9
  -5  11   2 831.227 34.8803   8
  -5  11   1 1022.82 37.3221  12
  -5 -11   1 912.748 36.1715   9
  -5 -11   0 641.468 27.7687   9
  -5 -11  -1 280.927 17.7095   9
  -5 -11  -2 221.667 16.1265   9
  -5  11  -2 261.358 18.3528   8
  -5  11  -3 93.4986 14.4815   8
  -5 -11  -3 101.387 13.0014   9
  -5 -11  -4 1733.45 58.4378   9
  -5  11  -4 1710.14 59.0491   8
  -5 -11  -5 151.181 13.7555   9
  -5  11  -5 152.731 12.9082   8
  -5  11  -6 4.30492 6.57215   8
   5 -11   6 18.4623 8.53953  11
  -5 -11  -6 8.06446 8.52894   9
   5 -11   7 87.8842 8.92952  11
  -5 -11  -7 81.7949 8.96290   9
   5 -11   8 18.4982 5.79126  11
  -5 -11  -8 24.5720 5.77709   9
  -5 -12  12 8.81160 5.68176  10
  -5 -12  11 52.1452 8.30303  10
  -5 -12  10 362.451 18.1894  10
  -5 -12   9 282.222 16.7023  10
  -5 -12   8 192.503 14.0527  10
  -5 -12   7 232.851 15.7269  10
  -5 -12   7 232.818 14.8426   9
  -5  12   6 339.443 18.0337  12
  -5 -12   6 304.872 17.1051   9
  -5  12   5 202.154 14.2201  12
  -5 -12   5 180.162 13.5338   9
  -5  12   4 316.327 17.7210  12
  -5 -12   4 282.612 16.8163   9
  -5  12   3 2169.24 66.9360  12
  -5 -12   3 1981.00 66.2705   9
  -5  12   3 1975.88 67.3463   8
  -5 -12   2 592.292 26.5019   9
  -5  12   2 559.173 27.9175   8
  -5 -12   1 382.108 20.1463   9
  -5 -12   0 287.542 17.5588   9
  -5 -12  -1 298.935 17.9906   9
  -5  12  -2 547.910 27.3788   7
  -5 -12  -2 540.739 25.2234   9
  -5  12  -2 536.180 27.1437   8
  -5 -12  -3 3394.75 107.675   9
  -5  12  -3 3588.71 109.557   8
  -5 -12  -4 307.559 18.3045   9
  -5  12  -4 306.712 18.7773   8
  -5  12  -5 23.6373 8.82603   8
  -5 -12  -5 20.8048 9.48080   9
   5 -12   6 138.192 11.2517  11
  -5 -12  -6 131.703 11.1642   9
  -5  12  -6 133.634 9.96619   8
   5 -12   7-4.03507 6.62858  11
  -5 -12  -7 3.82161 5.80151   9
  -5 -13  12 23.7499 5.56161  10
  -5 -13  11 174.700 11.2551  10
  -5 -13  10 106.193 10.3165  10
  -5 -13   9 67.0757 9.94175  10
  -5 -13   8 241.079 15.3674  10
  -5 -13   7 405.158 20.6635  10
  -5 -13   6 589.906 25.1561   9
  -5 -13   5 871.147 32.9846   9
  -5  13   4 548.039 23.5825  12
  -5 -13   4 490.729 23.1322   9
  -5  13   3 326.110 17.6673  12
  -5 -13   3 282.154 16.9402   9
  -5 -13   2 929.719 37.1269   9
  -5  13   2 965.597 38.9700   8
  -5 -13   1 187.119 14.3983   9
  -5 -13   0 543.864 24.8640   9
  -5  13  -1 510.371 26.2023   7
  -5 -13  -1 529.259 24.6405   9
  -5  13  -2 961.725 39.7135   7
  -5 -13  -2 1005.22 37.8144   9
  -5  13  -2 1022.24 39.8886   8
  -5 -13  -3 464.921 22.9233   9
  -5  13  -3 478.559 24.2670   8
  -5  13  -4 132.835 13.6786   8
  -5 -13  -4 125.334 12.3655   9
  -5 -13  -5 462.350 20.6688   9
  -5  13  -5 466.076 20.8101   8
   5 -13   6 116.695 10.1233  11
  -5 -13  -6 90.0496 9.07994   9
  -5  13  -6 94.3630 8.36079   8
   5 -13   7 64.5314 7.49204  11
  -5 -13  -7 55.0440 6.50664   9
  -5 -14  11 4.98357 5.75884  10
  -5 -14  10-1.95751 7.18252  10
  -5 -14   9 63.9321 9.65445  10
  -5 -14   8 103.584 11.2449  10
  -5 -14   7 66.9829 10.9357  10
  -5 -14   6 409.309 20.1954   9
  -5 -14   5 688.434 28.0595   9
  -5 -14   4 222.487 15.0166   9
  -5 -14   3 917.457 34.8729   9
  -5 -14   2 796.502 30.8282   9
  -5  14   2 724.178 31.6649   8
  -5 -14   1 134.889 12.8124   9
  -5  14   0 12.1381 9.86189   7
  -5 -14   0 7.24085 9.57000   9
  -5  14  -1 79.4479 13.1943   7
  -5 -14  -1 86.1300 11.6080   9
  -5  14  -2 772.166 34.0504   7
  -5 -14  -2 848.679 32.2189   9
  -5  14  -2 788.575 34.0104   8
  -5 -14  -3 295.943 17.4376   9
  -5  14  -3 299.944 18.8894   8
  -5 -14  -4 312.200 16.4832   9
  -5  14  -4 298.917 17.5300   8
  -5  14  -5 32.7372 8.26762   8
  -5 -14  -5 31.2064 7.68807   9
  -5  14  -6 31.9684 5.97314   8
   5 -14   6 41.4598 7.69741  11
  -5 -14  -6 27.3773 6.28012   9
   5 -14   7 13.4376 5.33532  11
  -5 -15  11 49.5451 6.04500  10
  -5 -15  10 236.257 12.7144  10
  -5 -15   9 268.240 14.9871  10
  -5 -15   8 25.1475 8.42075  10
  -5 -15   7 257.124 16.1692  10
  -5 -15   6 12.6373 8.91275   9
  -5 -15   5 1772.19 57.9728   9
  -5 -15   4 1381.83 47.3964   9
  -5 -15   3 2532.54 79.8540   9
  -5  15   2 132.066 13.2524   8
  -5 -15   2 147.012 12.9122   9
  -5  15   1 470.981 24.3381   7
  -5 -15   1 481.764 22.4218   9
  -5  15   1 461.413 23.4624   8
  -5  15   0 272.745 18.2617   7
  -5 -15   0 262.142 16.3365   9
  -5  15  -1 533.315 25.6026   7
  -5 -15  -1 501.486 22.6567   9
  -5  15  -2 152.167 14.5081   7
  -5 -15  -2 174.115 13.0023   9
  -5  15  -2 174.222 15.4070   8
  -5 -15  -3 230.388 14.1054   9
  -5  15  -3 203.234 15.7475   8
  -5  15  -4 26.2528 8.74910   8
  -5 -15  -4 43.6056 8.28067   9
  -5  15  -5 26.7376 7.33160   8
  -5 -15  -5 35.0948 6.78061   9
   5 -15   6 259.205 12.2196  11
  -5 -15  -6 232.397 10.9660   9
  -5  15  -6 251.875 11.1452   8
  -5 -16  10 45.5443 6.59221  10
  -5 -16   9 36.6291 7.38974  10
  -5 -16   8 218.345 13.5499  10
  -5 -16   7 47.1079 9.27049  10
  -5 -16   6 297.814 17.0899  10
  -5 -16   5 542.551 23.1521   9
  -5 -16   4 813.635 31.0575   9
  -5 -16   3 995.163 36.1561   9
  -5 -16   2 603.308 24.8932   9
  -5  16   2 547.659 24.9876   8
  -5  16   1 267.261 17.9212   7
  -5 -16   1 268.112 15.7087   9
  -5  16   1 237.777 16.4609   8
  -5  16   0 32.7773 10.2532   8
  -5  16   0 28.9449 10.5828   7
  -5 -16   0 36.1187 9.25057   9
  -5  16  -1 136.329 13.8968   8
  -5  16  -1 147.874 14.2897   7
  -5 -16  -1 154.911 12.2064   9
  -5  16  -2 112.709 12.9139   8
  -5  16  -2 111.996 12.3979   7
  -5 -16  -2 96.2772 10.3242   9
  -5  16  -3 99.6100 11.6347   8
  -5 -16  -3 109.584 9.82406   9
  -5  16  -4 59.7742 8.95235   8
  -5 -16  -4 56.3495 7.31217   9
  -5  16  -5 50.9766 6.97258   8
   5 -16   5 62.8278 7.70771  11
  -5 -16  -5 57.0199 6.29866   9
  -5 -17  10 256.656 11.3840  10
  -5 -17   9 59.1000 7.33556  10
  -5 -17   8 83.9254 9.03400  10
  -5 -17   7 476.162 20.8147  10
  -5 -17   6 204.479 13.8574  10
  -5 -17   5 547.380 22.6457   9
  -5 -17   4 764.258 28.7944   9
  -5 -17   3 64.1697 10.0951   9
  -5  17   2 209.947 15.3520   7
  -5 -17   2 242.419 14.2956   9
  -5  17   2 213.059 14.0130   8
  -5  17   1 291.917 17.8556   7
  -5 -17   1 284.614 15.4739   9
  -5  17   1 294.531 16.8820   8
  -5  17   0 235.715 15.9571   7
  -5 -17   0 274.316 14.5916   9
  -5  17   0 217.675 15.5356   8
  -5  17  -1 7.22998 9.21145   8
  -5  17  -1 11.9150 9.29776   7
  -5 -17  -1 5.91240 7.14929   9
  -5  17  -2 52.7997 10.2242   8
  -5  17  -2 66.2990 10.4678   7
  -5 -17  -2 64.0531 8.38723   9
  -5 -17  -3 202.714 10.9940   9
  -5  17  -3 178.695 12.8215   8
  -5  17  -4 27.3416 6.95163   8
  -5 -17  -4 37.8314 5.58709   9
   5 -17   5 36.7913 6.08750  11
  -5 -18   9 105.100 7.43052  10
  -5 -18   8 14.2994 6.19034  10
  -5 -18   7 393.237 17.3672  10
  -5 -18   6 190.844 12.2892  10
  -5 -18   4 40.0253 8.26725   9
  -5 -18   3 25.3382 7.65728   9
  -5  18   2 17.9900 7.32713   8
  -5  18   2 27.5966 8.92180   7
  -5 -18   2 32.1465 7.95066   9
  -5  18   1 7.88061 7.76891   8
  -5  18   1 14.3981 8.28892   7
  -5 -18   1 8.39861 6.71846   9
  -5  18   0 96.9337 10.5126   8
  -5  18   0 101.476 11.1327   7
  -5 -18   0 109.253 9.38644   9
  -5  18  -1 223.756 14.8134   7
  -5 -18  -1 232.829 12.3598   9
  -5  18  -1 244.622 14.4999   8
  -5  18  -2 54.1692 8.87226   8
  -5 -18  -2 40.8898 6.38656   9
  -5  18  -3 63.1559 8.25184   8
  -5 -18  -3 94.7975 6.80398   9
  -5  18  -4 25.7995 5.68943   8
   5 -18   4 34.0558 5.93839  11
  -5 -19   8 56.0808 6.00272  10
  -5 -19   7 44.6595 6.71787  10
  -5 -19   6 59.8402 7.67879  10
  -5 -19   5 618.247 23.8578  10
  -5 -19   3 104.290 8.93518   9
  -5  19   2 5.87789 7.37227   7
  -5 -19   2 7.66821 5.85869   9
  -5  19   1 28.5105 6.88277   8
  -5  19   1 21.0955 7.97430   7
  -5 -19   1 26.1671 6.19762   9
  -5  19   0 51.8141 7.86061   8
  -5  19   0 48.2255 8.55406   7
  -5 -19   0 50.7774 6.63207   9
  -5  19  -1 93.4735 8.91379   8
  -5  19  -1 104.576 9.78806   7
  -5 -19  -1 107.153 7.57153   9
  -5  19  -2 9.50422 6.25517   8
  -5 -19  -2 8.90259 4.42853   9
  -5  19  -3 55.8272 6.38626   8
  -5 -20   6 420.153 16.4830  10
  -5 -20   5 27.0761 6.07977  10
  -5 -20   4 28.8077 6.32478  10
  -5  20   2 108.256 9.36557   7
  -5 -20   2 135.545 8.33262   9
  -5  20   1 135.729 9.75908   7
  -5 -20   1 122.897 7.85319   9
  -5  20   1 107.824 7.90533   8
  -5  20   0 140.163 9.89453   7
  -5 -20   0 168.947 8.32491   9
  -5  20   0 136.843 8.96555   8
  -5  20  -1 46.4726 6.19467   8
  -5 -21   3 138.664 8.27639  10
  -6   0  14 15.6131 7.17867  12
  -6   0  13 26.1967 8.82979  12
  -6   0  12 543.602 25.6324  12
  -6   0  11 76.3098 12.4026  12
  -6   0  10 44.9199 11.0099  12
  -6   0   9 60.9064 11.5492  12
  -6   0   8 350.700 21.0696  12
  -6   0   7 1059.80 40.9759  12
  -6   0   6 54.3632 12.0485  12
  -6   0   5 768.023 31.7824  12
  -6   0   5 725.109 119.588   3
  -6   0   5 783.472 29.1305   8
  -6   0   4 94.3680 10.1902   8
  -6   0   4 146.384 67.3500   3
  -6   0   3 657.395 26.5491   8
  -6   0   2 7.44314 7.75876   8
  -6   0   1 565.273 24.4361   8
  -6   0   0 1285.08 44.9127   8
  -6   0  -1 432.979 20.8174   8
  -6   0  -2 433.030 20.7570   8
  -6   0  -3 93.8384 10.4671   8
  -6   1  14 33.3975 7.45593  12
  -6  -1  14 32.6852 7.63616  12
  -6   1  13 74.6943 10.5604  12
  -6  -1  13 73.1257 10.3575  12
  -6   1  12 210.529 15.5209  12
  -6  -1  12 193.548 15.0928  12
  -6   1  11 327.063 20.1274  12
  -6  -1  11 341.503 20.2281  12
  -6   1  10 117.317 14.0089  12
  -6  -1  10 133.813 14.0760  12
  -6   1   9 55.4281 11.7086  12
  -6  -1   9 52.2700 11.2572  12
  -6   1   8 0.85395 10.5281  12
  -6  -1   8-4.57749 11.3325  12
  -6   1   7 1570.55 55.5728  12
  -6  -1   7 1556.80 55.1541  12
  -6   1   6 1630.83 56.0994  12
  -6  -1   6 1593.01 55.6142  12
  -6   1   5 1364.73 50.7978  12
  -6  -1   5 1411.60 50.4134  12
  -6  -1   5 1440.62 166.707   3
  -6   1   5 1340.26 157.822   3
  -6  -1   5 1546.13 48.2764   8
  -6   1   5 1455.47 48.2155   8
  -6   1   4 417.052 20.8386  12
  -6   1   4 382.604 91.2397   3
  -6  -1   4 295.384 81.6450   3
  -6  -1   4 396.112 18.6834   8
  -6   1   4 408.971 19.2744   8
  -6  -1   3 418.317 19.4035   8
  -6   1   3 387.130 19.4594   8
  -6  -1   2 234.317 14.1390   8
  -6   1   2 226.792 14.6025   8
  -6   1   1 260.437 15.7416  12
  -6  -1   1 261.451 15.2099   8
  -6   1   1 238.084 15.2154   8
  -6   1   0 973.466 35.2253  12
  -6  -1   0 883.598 34.4401   8
  -6   1   0 937.429 35.4559   8
  -6  -1  -1 188.742 13.4308   8
  -6   1  -1 168.647 13.4838   8
  -6  -1  -2 176.118 13.1253   8
  -6   1  -2 198.130 14.1863   8
  -6  -1  -3 153.624 11.6755   8
  -6   1  -3 138.578 12.2530   8
  -6   1  -4 497.996 21.6134   8
  -6   2  14 37.8918 7.44363  12
  -6  -2  14 42.1049 7.77424  12
  -6   2  13 37.4926 8.73366  12
  -6  -2  13 37.7323 9.14834  12
  -6   2  12 23.1085 9.53311  12
  -6  -2  12 28.6570 10.1792  12
  -6   2  11 54.9207 11.3490  12
  -6  -2  11 57.4409 11.6475  12
  -6   2  10 544.634 26.8590  12
  -6  -2  10 517.882 26.3841  12
  -6  -2   9 187.941 15.8701  12
  -6   2   9 151.897 15.5687  12
  -6   2   8 665.694 30.3932  12
  -6  -2   8 672.467 30.2020  12
  -6   2   7 2994.95 96.7372  12
  -6  -2   7 3077.40 96.3516  12
  -6   2   6 2219.02 73.7376  12
  -6  -2   6 2192.38 72.8645  12
  -6  -2   6 2273.12 69.5895   8
  -6   2   5 2705.44 88.5202  12
  -6  -2   5 2769.72 87.6889  12
  -6  -2   5 2718.76 226.036   3
  -6  -2   5 2873.04 85.4657   8
  -6   2   5 2745.31 85.6344   8
  -6   2   5 2896.92 243.072   4
  -6   2   4 3470.49 105.293  12
  -6  -2   4 3480.26 248.292   3
  -6  -2   4 3449.97 102.860   8
  -6   2   4 3263.43 103.108   8
  -6   2   3 200.130 14.6579  12
  -6  -2   3 241.795 14.0129   8
  -6   2   3 210.589 14.3830   8
  -6   2   2 635.409 26.6870  12
  -6  -2   2 618.724 25.4764   8
  -6   2   2 636.373 26.6046   8
  -6   2   1 323.257 17.7837  12
  -6  -2   1 340.405 17.4086   8
  -6   2   1 307.000 17.7840   8
  -6  -2   0 583.769 24.9756   8
  -6   2   0 560.316 25.7820   8
  -6  -2  -1 395.901 18.8265   8
  -6   2  -1 352.317 19.4867   8
  -6  -2  -2 328.828 17.1220   8
  -6   2  -2 317.832 18.0211   8
  -6  -2  -3 279.504 15.0891   8
  -6   2  -3 265.871 16.0340   8
  -6   2  -4 509.129 22.2950   8
  -6   3  14 8.98691 6.21537  12
  -6  -3  14 4.18270 6.24321  12
  -6   3  13 13.8954 7.85730  12
  -6  -3  13 15.6404 8.61936  12
  -6   3  12 145.451 13.1579  12
  -6  -3  12 149.588 13.7914  12
  -6  -3  11 150.198 14.1222  12
  -6   3  11 130.441 14.1198  12
  -6   3  10 134.069 14.4617  12
  -6  -3  10 131.751 13.9218  12
  -6   3   9 255.409 18.3957  12
  -6  -3   9 288.771 18.6280  12
  -6   3   8 645.966 29.2169  12
  -6  -3   8 612.387 28.4992  12
  -6   3   7 2508.73 82.0049  12
  -6  -3   7 2492.56 80.8813  12
  -6   3   6 4317.30 137.525  12
  -6  -3   6 4635.80 133.682   8
  -6   3   5 3521.18 112.205  12
  -6  -3   5 3703.94 109.227   8
  -6   3   4 1460.27 50.9457  12
  -6  -3   4 1469.70 48.6545   8
  -6   3   4 1433.26 49.3101   8
  -6   3   3 538.445 24.4671  12
  -6  -3   3 534.286 22.5901   8
  -6   3   3 530.123 23.9285   8
  -6   3   2 1676.27 55.4067  12
  -6  -3   2 1648.65 53.7158   8
  -6   3   2 1563.41 55.0231   8
  -6  -3   1 65.3000 9.55626   8
  -6   3   1 47.1355 9.94790   8
  -6   3   1 49.7328 10.7704  12
  -6   3   0 1286.80 43.8060  12
  -6  -3   0 1216.46 42.4082   8
  -6   3   0 1170.40 43.9440   8
  -6   3  -1 123.150 12.3860   8
  -6  -3  -1 154.324 11.9327   8
  -6   3  -2 127.652 12.8140   8
  -6  -3  -2 145.516 11.4691   8
  -6  -3  -3 67.0337 9.01448   8
  -6   3  -3 74.3730 10.8651   8
  -6   3  -4 623.262 25.8063   8
  -6   4  14 17.4335 6.18721  12
  -6  -4  14 16.8783 6.43973  12
  -6  -4  13 133.581 11.4115  12
  -6   4  13 111.961 10.6523  12
  -6   4  12 17.7454 8.47273  12
  -6  -4  12 19.6473 9.49874  12
  -6   4  11 123.343 13.0189  12
  -6  -4  11 118.186 12.9843  12
  -6   4  10 23.8412 10.3545  12
  -6  -4  10 27.5039 10.0578  12
  -6   4   9 50.1039 11.8986  12
  -6  -4   9 47.3385 11.0188  12
  -6   4   8 66.5975 12.1373  12
  -6  -4   8 71.1399 11.7951  12
  -6   4   7 892.787 36.5726  12
  -6   4   6 2856.91 95.9708  12
  -6  -4   6 3153.39 92.5165   8
  -6   4   5 823.836 33.5788  12
  -6  -4   5 828.597 30.7292   8
  -6  -4   4 65.6119 9.35884   8
  -6   4   4 47.3883 9.65634   8
  -6   4   4 64.9812 10.8749  12
  -6   4   3 522.360 24.2255  12
  -6  -4   3 523.265 22.1994   8
  -6   4   3 506.625 23.5192   8
  -6   4   2 174.215 14.4410  12
  -6  -4   2 216.167 13.5449   8
  -6   4   2 195.602 14.7813   8
  -6   4   1 166.448 14.3825  12
  -6  -4   1 178.985 12.9249   8
  -6   4   1 175.637 14.3139   8
  -6   4   0 297.956 17.5944  12
  -6  -4   0 269.473 15.3114   8
  -6   4   0 275.174 17.3203   8
  -6  -4  -1 634.514 25.6565   8
  -6   4  -1 622.038 27.7028   8
  -6  -4  -2 88.3617 9.83112   8
  -6   4  -2 99.3944 12.3530   8
  -6   4  -3 543.176 24.9475   8
  -6   4  -4 123.766 12.2178   8
  -6   5  14 57.2570 6.85098  12
  -6  -5  14 65.7858 7.21784  12
  -6   5  13 51.1969 8.32744  12
  -6  -5  13 34.8574 8.08367  12
  -6   5  12 100.564 11.3309  12
  -6  -5  12 80.4183 10.8505  12
  -6   5  11 8.68601 9.03595  12
  -6  -5  11 3.84687 9.07942  12
  -6   5  10 28.8966 10.2740  12
  -6  -5  10 12.2115 8.97409  12
  -6   5   9 530.292 25.5442  12
  -6  -5   9 468.361 24.2673  12
  -6   5   8 949.594 38.2150  12
  -6   5   7 1190.54 45.0347  12
  -6   5   6 4349.96 142.437  12
  -6  -5   6 4921.72 139.063   8
  -6   5   5 380.739 20.7680  12
  -6  -5   5 391.928 18.7119   8
  -6   5   4 143.913 12.1781   8
  -6   5   4 148.846 13.6503  12
  -6  -5   4 150.992 12.0976   8
  -6   5   3 1034.46 39.7682  12
  -6  -5   3 1099.34 38.0563   8
  -6   5   3 1099.40 40.1254   8
  -6   5   2 449.230 22.0124  12
  -6  -5   2 445.676 20.1766   8
  -6   5   2 420.490 21.9473   8
  -6  -5   1 119.474 11.1848   8
  -6   5   1 136.818 13.5568   8
  -6  -5   1 111.487 11.2412   9
  -6  -5   0 1384.14 50.2845   9
  -6  -5   0 1489.61 49.3212   8
  -6   5   0 1412.71 51.4271   8
  -6  -5  -1 636.907 26.4392   8
  -6   5  -1 699.177 29.3303   8
  -6  -5  -2 253.832 14.5181   8
  -6   5  -2 244.399 16.8291   8
  -6   5  -3 428.494 21.8658   8
  -6   5  -4 1958.05 63.8760   8
  -6   6  13 12.5478 6.56866  12
  -6  -6  13 9.99145 6.69401  12
  -6   6  12 59.8096 9.46489  12
  -6  -6  12 55.8187 9.59122  12
  -6   6  11 68.6956 10.5127  12
  -6  -6  11 45.9827 9.92063  12
  -6   6  10 144.278 13.7740  12
  -6  -6  10 121.260 12.4819  12
  -6   6   9 3.92955 9.65513  12
  -6   6   8 253.334 17.7683  12
  -6   6   7 427.679 22.6892  12
  -6   6   6 3623.87 112.951  12
  -6   6   5 761.980 32.8030  12
  -6  -6   5 859.281 30.9490   8
  -6   6   4 209.255 15.5926  12
  -6   6   4 221.061 14.8258   8
  -6  -6   3 74.1317 9.57693   8
  -6   6   3 65.8945 10.6658  12
  -6   6   2 1046.13 38.8642  12
  -6  -6   2 1024.09 37.5799   9
  -6  -6   2 1032.81 36.8060   8
  -6   6   2 1027.54 39.2463   8
  -6   6   1 453.766 21.9048  12
  -6  -6   1 409.433 20.4749   9
  -6  -6   1 412.041 19.7364   8
  -6   6   1 436.797 22.7300   8
  -6  -6   0 16.8120 8.05510   8
  -6   6   0 29.2691 10.1265   8
  -6  -6   0 14.8803 9.03378   9
  -6   6  -1 161.373 14.6861   8
  -6  -6  -1 152.446 13.2981   9
  -6  -6  -1 147.842 11.9041   8
  -6  -6  -2 319.246 16.1936   8
  -6   6  -2 312.066 19.1169   8
  -6   6  -3 43.1906 11.4718   8
  -6   6  -4 133.415 12.6715   8
  -6   6  -5 182.055 12.2110   8
  -6  -6  -8 6.74068 5.60728   9
  -6   7  13 623.854 22.1276  12
  -6  -7  13 535.149 21.5943  12
  -6   7  12 131.251 10.8926  12
  -6  -7  12 129.117 10.7053  12
  -6   7  11 119.603 11.6736  12
  -6   7  10 53.0837 10.4841  12
  -6   7   9 18.3890 9.96033  12
  -6   7   8 441.841 23.0645  12
  -6   7   7 75.6132 11.7319  12
  -6   7   6 1021.99 39.3376  12
  -6   7   5 312.824 19.2042  12
  -6   7   4 560.422 26.0457  12
  -6  -7   4 547.525 23.8503   9
  -6  -7   4 629.078 24.7343   8
  -6   7   4 573.007 25.3025   8
  -6   7   3 359.236 20.3676  12
  -6  -7   3 384.945 19.2214   9
  -6   7   3 403.330 21.2629   8
  -6   7   2 192.997 15.0644  12
  -6  -7   2 154.417 12.9260   9
  -6  -7   2 169.464 12.6200   8
  -6   7   2 162.333 14.7557   8
  -6   7   1 158.335 14.7649   8
  -6   7   1 170.505 14.6988  12
  -6  -7   1 128.435 12.2764   9
  -6  -7   1 149.105 12.3009   8
  -6  -7   0 191.281 14.6358   9
  -6  -7   0 183.354 13.3072   8
  -6   7   0 214.230 16.4566   8
  -6   7  -1 11.5446 10.6903   8
  -6  -7  -1 19.0826 9.55994   9
  -6  -7  -1 23.1107 7.97856   8
  -6  -7  -2 402.162 22.0970   9
  -6  -7  -2 445.681 19.6712   8
  -6   7  -2 452.825 23.2385   8
  -6   7  -3 611.649 27.6001   8
  -6   7  -4 337.466 18.3553   8
  -6   7  -5 160.618 11.5122   8
  -6  -7  -7 105.134 9.40620   9
  -6  -7  -8 23.1948 5.29976   9
  -6   8  13 218.806 10.9893  12
  -6   8  12 95.4600 9.14717  12
  -6   8  11 18.4819 7.70478  12
  -6   8  10 134.859 12.5382  12
  -6   8   9 258.095 16.8651  12
  -6   8   8 61.1711 11.0601  12
  -6   8   7 44.8454 10.5656  12
  -6   8   6 543.420 25.7732  12
  -6   8   5 1749.42 59.1100  12
  -6  -8   5 1700.54 55.9694   9
  -6   8   4 30.3454 9.40764   8
  -6   8   4 26.5477 10.8994  12
  -6  -8   4 29.4347 8.30344   9
  -6   8   3 1172.15 44.5080  12
  -6  -8   3 1218.01 43.1266   9
  -6  -8   3 1283.48 42.7055   8
  -6   8   3 1214.89 44.7404   8
  -6   8   2 1461.72 50.0230  12
  -6  -8   2 1320.77 48.6089   9
  -6  -8   2 1520.42 48.1887   8
  -6   8   2 1341.96 50.4041   8
  -6   8   1 383.789 20.8714  12
  -6  -8   1 334.327 19.2312   9
  -6  -8   1 369.240 18.5948   8
  -6   8   1 363.398 21.4148   8
  -6   8   0 55.0497 12.2144   8
  -6  -8   0 59.4498 10.3381   9
  -6  -8   0 66.5597 9.86522   8
  -6   8  -1 32.7970 11.6413   8
  -6  -8  -1 29.7957 9.90533   9
  -6  -8  -1 36.0497 8.91543   8
  -6   8  -2 158.689 15.8494   8
  -6  -8  -2 154.632 14.7743   9
  -6  -8  -3 852.848 34.7495   9
  -6   8  -3 882.955 35.0005   8
  -6  -8  -4 132.706 13.7539   9
  -6   8  -4 151.011 13.1580   8
  -6  -8  -5 390.009 19.6318   9
  -6   8  -5 371.339 17.6064   8
  -6  -8  -6 5.55506 7.91348   9
  -6  -8  -7 7.07625 6.13159   9
  -6   9  12 56.6869 7.40312  12
  -6   9  11 54.1579 8.55659  12
  -6   9  10 96.3182 10.5709  12
  -6   9   9 400.202 20.3955  12
  -6   9   8 144.765 13.3783  12
  -6   9   7 920.773 35.3490  12
  -6  -9   7 853.518 31.9239   9
  -6   9   6 508.011 24.7647  12
  -6  -9   6 535.498 22.4191   9
  -6   9   5 271.292 17.8285  12
  -6  -9   5 275.880 15.4867   9
  -6   9   4 65.7326 10.5185   8
  -6   9   4 60.5892 11.6703  12
  -6  -9   4 65.1790 9.56540   9
  -6   9   3 320.665 18.4698  12
  -6  -9   3 292.252 16.8371   9
  -6   9   3 293.377 18.2000   8
  -6   9   2 366.650 20.0702  12
  -6  -9   2 346.561 19.0453   9
  -6   9   2 372.678 21.0316   8
  -6  -9   1 224.516 15.7924   9
  -6   9   1 235.951 18.1288   8
  -6   9   0 39.2939 11.9873   8
  -6  -9   0 50.0086 10.4160   9
  -6  -9  -1 586.698 26.8325   9
  -6   9  -1 590.790 27.9470   8
  -6  -9  -2 1559.88 53.7521   9
  -6   9  -2 1519.51 54.5758   8
  -6  -9  -3 667.493 29.3751   9
  -6   9  -3 686.046 29.4864   8
  -6   9  -4 53.8974 10.4253   8
  -6  -9  -4 31.2914 10.3397   9
  -6   9  -5 12.1223 7.49381   8
  -6  -9  -5 21.1581 9.09052   9
  -6  -9  -6 39.1013 8.14163   9
  -6  -9  -7 106.268 8.39438   9
  -6  10  11-2.88922 6.79694  12
  -6  10  10-3.40158 8.18497  12
  -6  10   9-7.59472 8.80885  12
  -6  10   8 377.890 19.8766  12
  -6  10   7 121.789 13.1050  12
  -6 -10   7 144.296 11.2729   9
  -6  10   6 37.8679 10.2128  12
  -6 -10   6 49.9704 8.67410   9
  -6  10   5 1507.54 51.3909  12
  -6 -10   5 1423.77 49.0270   9
  -6  10   4 111.343 13.0597  12
  -6 -10   4 126.118 11.4850   9
  -6  10   3 279.012 17.3165  12
  -6 -10   3 258.207 16.1021   9
  -6  10   3 274.403 17.6479   8
  -6  10   2 38.8846 11.3721   8
  -6 -10   2 30.7225 9.21626   9
  -6 -10   1 327.057 18.7741   9
  -6  10   1 345.318 20.7189   8
  -6  10   0 170.692 15.9105   8
  -6 -10   0 174.640 14.6730   9
  -6  10  -1 68.7093 13.6433   8
  -6 -10  -1 94.4649 12.6258   9
  -6 -10  -2 612.396 27.5688   9
  -6  10  -2 656.542 29.4097   8
  -6 -10  -3 1747.81 60.6080   9
  -6  10  -3 1903.12 61.6983   8
   6 -10   4 149.435 11.1110  11
  -6 -10  -4 123.060 12.7513   9
  -6  10  -4 142.163 12.4272   8
  -6  10  -5 27.8826 7.08473   8
   6 -10   5 34.2895 7.00560  11
  -6 -10  -5 26.0105 8.48080   9
  -6 -10  -6 31.4079 7.45290   9
  -6 -10  -7 78.7507 6.83848   9
  -6  11  10 8.06003 7.68917  12
  -6  11   9 434.039 19.9407  12
  -6  11   8 153.080 12.8096  12
  -6  11   7 1042.36 38.5381  12
  -6 -11   7 1041.56 36.7922   9
  -6  11   6 119.444 12.5330  12
  -6 -11   6 134.984 11.6374   9
  -6  11   5 189.727 14.3989  12
  -6 -11   5 172.424 12.9340   9
  -6  11   4 320.924 17.8891  12
  -6 -11   4 271.652 16.4852   9
  -6  11   3 138.335 13.4446   8
  -6  11   3 150.010 13.5264  12
  -6 -11   3 134.567 12.2873   9
  -6  11   2 39.3374 11.3104   8
  -6 -11   2 22.7461 9.33316   9
  -6  11   1 36.0584 11.4321   8
  -6 -11   1 33.8142 10.0491   9
  -6 -11   0 237.130 16.4173   9
  -6  11   0 219.119 17.5337   8
  -6 -11  -1 304.869 18.6208   9
  -6  11  -1 313.082 20.2194   8
  -6  11  -2 5.38402 11.8095   8
  -6 -11  -2-0.90679 10.3428   9
  -6 -11  -3 873.984 34.1886   9
  -6  11  -3 912.329 35.0940   8
  -6  11  -4-4.83231 8.32894   8
  -6 -11  -4 2.84367 8.79470   9
  -6  11  -5 100.799 8.70137   8
   6 -11   5 94.8917 8.35241  11
  -6 -11  -5 88.9083 9.65474   9
  -6 -11  -6 9.03291 6.06480   9
  -6  12   8 197.516 13.0405  12
  -6  12   7 74.1181 10.4322  12
  -6  12   6 340.564 18.2757  12
  -6 -12   6 344.375 17.4488   9
  -6  12   5 61.2857 10.6281  12
  -6 -12   5 27.6371 9.03701   9
  -6  12   4 407.468 20.1660  12
  -6 -12   4 357.143 18.7572   9
  -6  12   3 329.366 18.1795  12
  -6 -12   3 293.619 17.3867   9
  -6  12   3 300.151 17.9667   8
  -6  12   2 124.140 13.3345   8
  -6 -12   2 106.129 11.7359   9
  -6  12   1 14.2926 10.7279   8
  -6 -12   1 11.5000 9.36366   9
  -6 -12   0 321.227 18.4681   9
  -6  12   0 291.969 19.3676   8
  -6  12  -1 112.165 14.5316   8
  -6 -12  -1 88.2272 12.4326   9
  -6  12  -2 67.1027 12.5691   8
  -6 -12  -2 107.904 12.4110   9
  -6  12  -3 136.313 13.2899   8
  -6 -12  -3 158.200 13.1695   9
  -6  12  -4 73.1840 9.54330   8
   6 -12   4 85.2600 8.90285  11
  -6 -12  -4 72.1104 9.88267   9
  -6  12  -5 63.2364 7.09924   8
   6 -12   5 53.0177 7.04043  11
  -6 -12  -5 66.2952 8.34474   9
  -6 -12  -6 21.1969 5.37139   9
  -6 -13   9 332.062 15.5705  10
  -6 -13   8 50.6205 8.20241  10
  -6  13   7 703.884 27.0596  12
  -6  13   6 286.637 15.4543  12
  -6 -13   6 239.972 14.9910   9
  -6  13   5 434.920 20.3566  12
  -6 -13   5 413.385 19.9142   9
  -6  13   4 411.792 19.6567  12
  -6 -13   4 335.909 18.2708   9
  -6 -13   3 637.422 26.5094   9
  -6  13   3 637.414 27.0789   8
  -6 -13   2 275.668 16.7476   9
  -6  13   2 275.620 17.7744   8
  -6  13   1 108.901 13.0429   8
  -6 -13   1 129.140 12.2601   9
  -6 -13   0 316.124 17.8247   9
  -6  13   0 255.719 18.0356   8
  -6 -13  -1 322.505 17.8719   9
  -6  13  -1 297.718 19.1655   8
  -6 -13  -2 333.675 18.0739   9
  -6  13  -2 321.541 19.0232   8
  -6 -13  -3 487.375 21.2520   9
  -6  13  -3 467.423 21.6798   8
  -6 -13  -4 204.897 12.5802   9
  -6  13  -4 198.012 12.3523   8
   6 -13   5 203.232 10.3901  11
  -6 -13  -5 224.679 11.2312   9
  -6  13  -5 209.922 10.5765   8
  -6 -14  10 203.491 10.4305  10
  -6 -14   9 81.5814 8.00568  10
  -6 -14   8 39.8789 7.39328  10
  -6 -14   7 101.672 10.0857  10
  -6 -14   6 816.376 31.5251  10
  -6 -14   6 900.372 31.5990   9
  -6  14   5 186.112 13.1682  12
  -6 -14   5 173.406 12.8179   9
  -6 -14   4 991.334 36.0045   9
  -6  14   3 61.1250 9.76267   8
  -6 -14   3 57.4286 9.92037   9
  -6 -14   2 182.176 13.8299   9
  -6  14   2 196.785 14.5967   8
  -6 -14   1 153.130 12.8784   9
  -6  14   1 176.873 14.4025   8
  -6  14   0 18.6386 10.4287   8
  -6 -14   0 9.19540 8.89396   9
  -6  14  -1 67.2145 11.8072   8
  -6 -14  -1 68.4727 10.5042   9
  -6 -14  -2 686.074 26.2449   9
  -6  14  -2 647.884 27.4471   8
  -6 -14  -3 179.111 11.8320   9
  -6  14  -3 171.672 12.5182   8
  -6  14  -4 14.8477 6.27447   8
   6 -14   4 22.4670 6.55233  11
  -6 -14  -4 18.0799 6.27039   9
  -6 -14  -5 9.93068 4.65745   9
  -6 -15   9-4.15876 5.31155  10
  -6 -15   8 55.5146 7.53702  10
  -6 -15   7 56.8570 8.00688  10
  -6 -15   6 94.2482 9.41843  10
  -6 -15   5 314.012 16.5193  10
  -6 -15   5 325.855 16.4785   9
  -6 -15   4 37.9866 9.51308   9
  -6 -15   3 475.350 20.3781   9
  -6  15   3 408.893 19.3773   8
  -6 -15   2 672.883 25.9303   9
  -6  15   2 596.284 26.0035   8
  -6 -15   1 547.682 22.9729   9
  -6  15   1 502.233 23.3282   8
  -6 -15   0 157.406 12.2444   9
  -6  15   0 139.821 13.0403   8
  -6  15  -1 115.868 12.0238   8
  -6 -15  -1 105.071 10.3332   9
  -6  15  -2 24.4418 8.52070   8
  -6 -15  -2 21.8861 7.52854   9
  -6 -15  -3 453.677 18.2071   9
  -6  15  -3 446.805 18.9721   8
   6 -15   4 152.046 8.79478  11
  -6 -15  -4 150.341 8.77370   9
  -6  15  -4 160.483 9.30260   8
  -6 -16   8 89.7472 7.74401  10
  -6 -16   7 214.684 11.9391  10
  -6 -16   6 199.196 12.0323  10
  -6 -16   5 277.995 14.7840  10
  -6 -16   5 289.297 14.9507   9
  -6 -16   4 851.525 30.7283   9
  -6 -16   3 124.408 10.9452   9
  -6  16   2 35.1197 7.96185   8
  -6 -16   2 26.6677 8.19938   9
  -6  16   1 39.0680 8.74494   8
  -6 -16   1 48.2580 8.50370   9
  -6  16   0 12.3125 7.85782   8
  -6 -16   0 8.19462 7.35461   9
  -6  16  -1 5.78935 7.48859   8
  -6 -16  -1 0.07299 6.22956   9
  -6 -16  -2 150.091 9.59467   9
  -6  16  -2 137.671 10.5513   8
  -6  16  -3 13.9924 5.96064   8
  -6 -16  -3 10.5676 5.24644   9
  -6 -17   7 19.0756 5.67562  10
  -6 -17   6 163.191 10.0570  10
  -6 -17   5 152.434 10.2175  10
  -6 -17   4 112.425 9.50442   9
  -6 -17   3 34.3726 7.40276   9
  -6 -17   2 123.505 9.70058   9
  -6  17   2 126.315 9.39519   8
  -6  17   1 12.4874 6.84581   8
  -6 -17   1 5.38791 6.46685   9
  -6  17   0 50.7776 7.88235   8
  -6 -17   0 53.1412 7.06293   9
  -6  17  -1 24.3248 6.79495   8
  -6 -17  -1 24.2579 5.95911   9
  -6  17  -2 23.4833 6.14143   8
  -6 -17  -2 24.0317 5.20884   9
  -6 -18   6 307.995 13.1693  10
  -6 -18   5 325.292 14.0344  10
  -6 -18   4 170.957 9.94617  10
  -6 -18   3 116.250 8.62729   9
  -6 -18   2 4.76840 5.47286   9
  -6  18   1 45.2788 6.41176   8
  -6 -18   1 55.6097 6.45563   9
  -6 -18   0 145.738 8.49570   9
  -6  18   0 131.316 8.93410   8
  -6 -18  -1 88.3656 6.39419   9
  -6  18  -1 73.3907 6.94226   8
  -6 -19   2 41.3253 5.22521   9
  -6 -19   1 17.4059 4.43777   9
  -7   0  13 5.43125 6.95543  12
  -7   0  12 50.4603 9.51122  12
  -7   0  11-4.65898 9.01229  12
  -7   0  10 47.3550 10.9906  12
  -7   0   9 851.875 34.9491  12
  -7   0   8 1002.04 39.5946  12
  -7   0   7 2059.25 69.0088  12
  -7   0   6 4967.28 152.445  12
  -7   0   6 5109.24 149.304   8
  -7   0   5 23.3077 8.83640   8
  -7   0   5-11.9761 10.8976  12
  -7   0   4 967.391 37.2284  12
  -7   0   4 1015.90 36.5130   8
  -7   0   3 83.4396 11.0930   8
  -7   0   3 72.9884 10.4255  12
  -7   0   2 288.548 17.4679   8
  -7   0   1 292.906 17.5425   8
  -7   0   0 1003.11 37.3111   8
  -7   0  -1 209.237 14.3943   8
  -7   0  -2 77.1308 10.0756   8
  -7   0  -3 692.879 26.3543   8
  -7   1  13 13.2102 7.08741  12
  -7  -1  13 11.2184 6.82659  12
  -7   1  12 174.974 13.0393  12
  -7  -1  12 154.296 12.5440  12
  -7   1  11 73.1470 11.0990  12
  -7  -1  11 64.4572 10.6686  12
  -7  -1  10 152.936 14.2288  12
  -7   1  10 143.220 14.2016  12
  -7   1   9 345.641 20.3395  12
  -7  -1   9 331.832 19.8850  12
  -7   1   8 251.127 18.0641  12
  -7  -1   8 276.488 18.0207  12
  -7   1   7 100.537 13.4539  12
  -7  -1   7 112.735 13.4690  12
  -7   1   6 1025.06 39.9175  12
  -7  -1   6 1045.87 39.7645  12
  -7  -1   6 1065.94 37.1437   8
  -7   1   6 1040.84 36.8065   8
  -7   1   5 180.666 15.2626  12
  -7  -1   5 181.409 14.6228  12
  -7  -1   5 197.933 13.7050   8
  -7   1   5 224.582 14.0773   8
  -7   1   4 297.995 18.4571  12
  -7  -1   4 351.221 17.9952   8
  -7   1   4 348.454 18.4393   8
  -7   1   3 230.779 16.0410  12
  -7  -1   3 269.678 16.1096   8
  -7   1   3 257.208 16.1017   8
  -7   1   2 304.487 17.8280  12
  -7  -1   2 347.753 18.3843   8
  -7   1   2 295.647 18.0929   8
  -7   1   1 136.211 13.4060   8
  -7   1   1 161.089 13.4288  12
  -7  -1   1 135.118 12.5936   8
  -7  -1   0 157.017 13.2966   8
  -7   1   0 158.809 13.5240   8
  -7  -1  -1 89.5912 10.9353   8
  -7   1  -1 86.9269 11.3251   8
  -7  -1  -2 107.001 16.8969   8
  -7   1  -2 102.310 11.2006   8
  -7  -1  -3 97.1887 9.69054   8
  -7   1  -3 119.989 10.5419   8
  -7  -1  -6 12.5598 5.31733   9
  -7   2  13 32.0157 7.42058  12
  -7  -2  13 36.3596 7.47855  12
  -7   2  12 47.3622 9.42486  12
  -7  -2  12 47.3461 9.02811  12
  -7   2  11 151.222 13.2811  12
  -7  -2  11 137.022 12.7906  12
  -7   2  10 1.53452 9.22277  12
  -7  -2  10-0.54594 9.14679  12
  -7   2   9 117.321 13.2960  12
  -7  -2   9 99.6621 12.6031  12
  -7   2   8 65.0621 12.2173  12
  -7  -2   8 35.4717 10.5729  12
  -7   2   7 820.931 34.0348  12
  -7  -2   7 797.473 32.9754  12
  -7   2   6 361.531 21.1204  12
  -7  -2   6 408.968 20.5461  12
  -7  -2   6 386.642 18.6682   8
  -7  -2   5 84.0823 10.6455   8
  -7   2   5 86.1296 10.1448   8
  -7   2   5 70.5339 11.8011  12
  -7   2   4 291.247 18.1483  12
  -7  -2   4 310.117 17.3108   8
  -7   2   4 337.799 17.9182   8
  -7   2   3 168.286 13.9967  12
  -7  -2   3 194.395 14.0926   8
  -7   2   3 191.029 14.5547   8
  -7   2   2 863.942 34.0401  12
  -7  -2   2 888.626 33.5208   8
  -7   2   2 879.111 34.4718   8
  -7   2   1 818.103 31.2511  12
  -7  -2   1 776.885 30.9839   8
  -7   2   1 748.595 31.8973   8
  -7  -2   0 472.989 22.0777   8
  -7   2   0 486.846 23.6000   8
  -7  -2  -1 295.236 16.1726   8
  -7   2  -1 243.961 16.3245   8
  -7  -2  -2 156.043 12.1753   8
  -7   2  -2 166.577 13.2862   8
  -7  -2  -3 191.398 11.8967   8
  -7   2  -3 178.920 12.5262   8
  -7   2  -4 152.918 10.0967   8
  -7  -2  -6-1.89426 5.35338   9
  -7   3  13 39.1024 7.39995  12
  -7  -3  13 26.5168 6.96734  12
  -7   3  12 16.5374 7.90364  12
  -7  -3  12 20.8613 8.02255  12
  -7   3  11 117.069 11.8867  12
  -7  -3  11 98.3281 11.4845  12
  -7   3  10 314.303 18.5142  12
  -7  -3  10 282.786 17.7987  12
  -7   3   9 859.181 34.4790  12
  -7  -3   9 806.972 33.3164  12
  -7   3   8 584.697 27.1374  12
  -7  -3   8 564.824 26.1776  12
  -7   3   7 467.816 23.9862  12
  -7   3   6 684.430 30.5837  12
  -7  -3   6 754.995 28.2923   8
  -7   3   5 240.289 17.0049  12
  -7  -3   5 254.321 15.4767   8
  -7   3   5 264.739 15.7191   8
  -7   3   4 272.495 17.4643  12
  -7  -3   4 267.081 16.3210   8
  -7   3   4 299.200 17.1671   8
  -7   3   3 385.419 20.7012  12
  -7  -3   3 408.068 19.8454   8
  -7   3   3 374.057 20.2385   8
  -7   3   2 234.180 16.1457  12
  -7  -3   2 241.445 15.8153   8
  -7   3   2 267.238 17.4557   8
  -7  -3   1 321.711 18.4993   8
  -7   3   1 313.212 19.5240   8
  -7  -3   0 287.448 16.5439   8
  -7   3   0 284.094 18.1032   8
  -7  -3  -1 41.6241 9.21598   8
  -7   3  -1 39.9634 10.5592   8
  -7  -3  -2 698.151 28.8695   9
  -7  -3  -2 700.201 27.2340   8
  -7   3  -2 746.080 29.3070   8
  -7   3  -3 117.863 10.7706   8
  -7  -3  -3 105.051 11.3389   9
  -7  -3  -3 114.674 9.78299   8
  -7  -3  -4 120.121 11.1739   9
  -7   3  -4 137.858 9.74619   8
  -7  -3  -5 10.9897 6.98986   9
  -7  -3  -6 32.6835 6.20016   9
  -7   4  13 8.96811 6.08977  12
  -7  -4  13 1.19723 5.79662  12
  -7   4  12 222.895 13.3820  12
  -7  -4  12 190.941 12.4892  12
  -7   4  11 226.556 14.8802  12
  -7  -4  11 210.805 14.0268  12
  -7   4  10 45.6001 10.0938  12
  -7  -4  10 26.3962 9.20785  12
  -7   4   9 51.0395 10.9922  12
  -7  -4   9 43.2307 10.5369  12
  -7   4   8 106.391 13.1061  12
  -7   4   7 279.013 18.2116  12
  -7   4   6 269.459 18.2994  12
  -7  -4   6 323.035 16.5265   8
  -7   4   5 887.477 36.5444  12
  -7  -4   5 973.553 34.4041   8
  -7   4   5 928.896 34.5738   8
  -7   4   4 138.015 13.4999  12
  -7  -4   4 137.790 12.6769   8
  -7   4   4 156.435 12.8845   8
  -7  -4   3 26.4832 9.37327   8
  -7   4   3 31.0488 10.2948   8
  -7   4   3 31.6455 10.4523  12
  -7   4   2 1108.57 40.8155  12
  -7  -4   2 1126.69 40.0689   8
  -7   4   2 1093.33 41.7539   8
  -7   4   1 798.049 31.1995  12
  -7  -4   1 746.984 29.9513   8
  -7   4   1 748.710 32.0175   8
  -7  -4   0 81.2857 10.8201   8
  -7   4   0 73.4699 12.0898   8
  -7  -4  -1 460.309 21.9837   9
  -7  -4  -1 467.816 20.9387   8
  -7   4  -1 481.378 23.2594   8
  -7   4  -2 139.646 13.2003   8
  -7  -4  -2 153.878 12.9801   9
  -7  -4  -2 138.163 10.9608   8
  -7  -4  -3 309.476 17.7429   9
  -7   4  -3 354.781 17.3531   8
  -7  -4  -4 135.695 11.5503   9
  -7   4  -4 151.323 10.3808   8
  -7  -4  -5 81.0746 8.78193   9
  -7  -4  -6 51.2172 6.73964   9
  -7   5  13 67.7527 7.35404  12
  -7   5  12 197.714 12.4353  12
  -7  -5  12 176.583 11.6742  12
  -7   5  11 45.7703 9.43294  12
  -7  -5  11 34.0046 8.32760  12
  -7   5  10 180.341 14.1321  12
  -7   5   9 234.784 16.4564  12
  -7   5   8 719.994 30.9648  12
  -7   5   7 386.365 21.2483  12
  -7   5   6 66.4886 11.8400  12
  -7  -5   6 145.078 11.7517   8
  -7   5   5 632.164 29.1688  12
  -7   5   5 644.701 27.1799   8
  -7   5   4 115.097 12.1526   8
  -7   5   4 98.0424 12.6135  12
  -7  -5   4 101.511 11.5015   8
  -7   5   3 509.962 24.7617  12
  -7  -5   3 552.069 23.8116   8
  -7   5   3 518.342 24.9443   8
  -7  -5   2 128.095 12.5936   8
  -7   5   2 137.726 14.9005   8
  -7   5   2 158.028 13.8693  12
  -7   5   1 251.934 16.4642  12
  -7  -5   1 235.707 15.1971   8
  -7   5   1 231.075 16.9446   8
  -7  -5   0 94.6630 10.9444   8
  -7   5   0 106.267 13.1931   8
  -7  -5   0 101.396 10.9342   9
  -7  -5  -1 436.223 21.6189   9
  -7  -5  -1 467.321 20.2112   8
  -7   5  -1 433.365 22.5805   8
  -7  -5  -2 483.557 22.7442   9
  -7  -5  -2 470.815 20.0108   8
  -7   5  -2 485.528 22.9166   8
  -7  -5  -3 469.295 22.3086   9
  -7   5  -3 520.438 21.9697   8
  -7  -5  -4 313.286 16.8175   9
  -7   5  -4 355.875 15.8884   8
  -7  -5  -5 9.68626 6.70686   9
  -7  -5  -6 4.54060 5.22485   9
  -7   6  13 43.1760 6.30365  12
  -7   6  12 250.421 13.4539  12
  -7   6  11 80.2129 9.74550  12
  -7   6  10 23.4223 9.23763  12
  -7   6   9 314.218 18.3337  12
  -7   6   8 95.4322 12.0359  12
  -7   6   7 159.386 14.4505  12
  -7   6   6 611.359 27.5940  12
  -7   6   5 164.785 15.0403  12
  -7   6   5 163.474 12.9572   8
  -7   6   4 233.070 16.7793  12
  -7   6   4 261.323 16.5612   8
  -7   6   3 52.0486 10.9778   8
  -7   6   3 62.3671 11.0810  12
  -7  -6   3 71.8947 10.7557   8
  -7   6   2-1.55515 11.0214   8
  -7   6   2 32.7334 10.6805  12
  -7  -6   2 6.36990 9.34761   8
  -7  -6   1 193.316 13.8121   9
  -7  -6   1 181.501 13.7770   8
  -7   6   1 188.223 16.2370   8
  -7   6   0 22.4787 11.3602   8
  -7  -6   0 55.7513 9.95371   9
  -7  -6   0 42.2461 9.38992   8
  -7  -6  -1 167.978 14.1783   9
  -7   6  -1 177.473 15.5976   8
  -7   6  -2 32.0666 10.6252   8
  -7  -6  -2 28.4986 9.89854   9
  -7  -6  -2 59.7404 8.30021   8
  -7  -6  -3 153.229 12.9464   9
  -7   6  -3 176.017 12.6710   8
  -7   6  -4 87.4044 8.57350   8
  -7  -6  -4 61.7905 9.60050   9
  -7  -6  -5 23.3670 7.14353   9
  -7  -6  -6 11.8772 4.99280   9
  -7   7  12 34.9440 7.15873  12
  -7   7  11 41.1482 8.10924  12
  -7   7  10 194.171 13.4809  12
  -7   7   9 57.7198 10.3153  12
  -7   7   8 445.614 22.5467  12
  -7   7   7 49.2681 10.9044  12
  -7   7   6 74.0990 11.2952  12
  -7   7   5 450.636 22.6720  12
  -7   7   4 370.334 20.8596  12
  -7   7   4 393.429 20.5435   8
  -7   7   3 349.555 19.7483  12
  -7  -7   3 364.459 18.9357   8
  -7   7   3 331.396 19.5042   8
  -7   7   2 883.768 33.5353  12
  -7  -7   2 799.333 31.6727   9
  -7  -7   2 878.002 32.3160   8
  -7   7   2 797.236 33.9405   8
  -7   7   1 91.4773 13.5653   8
  -7  -7   1 110.231 11.6385   9
  -7  -7   1 108.899 11.6633   8
  -7  -7   0 174.844 13.9979   9
  -7  -7   0 214.652 13.8453   8
  -7   7   0 195.854 16.3541   8
  -7  -7  -1 199.617 14.9762   9
  -7  -7  -1 230.078 13.8232   8
  -7   7  -1 198.411 16.4788   8
  -7  -7  -2 305.825 17.9332   9
  -7   7  -2 319.901 18.3819   8
  -7   7  -3 93.5577 10.4145   8
  -7  -7  -3 72.6456 10.6400   9
  -7  -7  -4 126.054 10.9647   9
  -7   7  -4 126.536 9.54880   8
  -7  -7  -5 8.96239 6.20758   9
  -7  -7  -6 11.3667 4.77517   9
  -7   8  12 140.927 9.09165  12
  -7   8  11 38.8808 7.61565  12
  -7   8  10 91.3823 10.2218  12
  -7   8   9 194.692 14.2793  12
  -7   8   8 131.641 12.8267  12
  -7   8   7 18.1880 9.56699  12
  -7   8   6 205.975 15.4484  12
  -7   8   5 53.1769 10.4870  12
  -7   8   4 251.251 16.3795  12
  -7   8   4 213.778 14.9632   8
  -7   8   3 540.586 24.4444  12
  -7  -8   3 499.620 22.0774   9
  -7   8   3 495.462 24.2200   8
  -7  -8   2 301.564 17.3157   9
  -7   8   2 301.787 19.1162   8
  -7   8   1 80.9974 12.2950   8
  -7  -8   1 57.0185 9.92410   9
  -7  -8   0 252.005 16.2473   9
  -7   8   0 255.419 17.9493   8
  -7  -8  -1 865.852 33.6531   9
  -7   8  -1 893.834 35.1137   8
  -7  -8  -2 833.797 32.5321   9
  -7   8  -2 870.127 33.2007   8
  -7  -8  -3 190.283 13.5794   9
  -7   8  -3 235.459 13.9249   8
  -7   8  -4-1.54931 6.49140   8
  -7  -8  -4 8.63741 7.16737   9
  -7  -8  -5 7.43151 5.93240   9
  -7   9  11 34.6915 6.84547  12
  -7   9  10 59.1510 8.66948  12
  -7   9   9 131.448 11.6869  12
  -7   9   8 702.743 28.5592  12
  -7   9   7 63.8102 10.3760  12
  -7   9   6 250.702 16.4871  12
  -7   9   5 103.582 12.2106  12
  -7   9   4 9.70000 8.76178   8
  -7   9   4 32.1927 10.1807  12
  -7  -9   4 17.0207 7.56421   9
  -7   9   3 441.561 21.3251  12
  -7  -9   3 420.922 19.8283   9
  -7   9   3 405.213 21.3093   8
  -7   9   2 104.610 13.2869   8
  -7  -9   2 83.5658 10.7385   9
  -7   9   1 108.312 13.5791   8
  -7  -9   1 113.861 11.8971   9
  -7  -9   0 204.532 14.3931   9
  -7   9   0 195.775 16.6372   8
  -7  -9  -1 300.357 17.4467   9
  -7   9  -1 326.387 19.1897   8
  -7  -9  -2 492.135 22.3933   9
  -7   9  -2 494.548 22.8498   8
  -7  -9  -3 169.717 12.1440   9
  -7   9  -3 157.210 11.6489   8
  -7   9  -4 5.12157 5.79558   8
  -7  -9  -4 6.64052 6.72124   9
  -7  -9  -5 33.8059 5.86547   9
  -7  10  11 27.6862 5.79817  12
  -7  10  10 7.99349 6.37141  12
  -7  10   9 19.7485 7.56169  12
  -7  10   8 43.1912 9.16146  12
  -7  10   7 254.266 15.6165  12
  -7  10   6 1177.26 42.0372  12
  -7  10   5 286.221 17.1046  12
  -7 -10   5 275.066 15.0347   9
  -7  10   4 255.884 16.1012  12
  -7 -10   4 237.487 14.5229   9
  -7  10   4 244.731 14.9650   8
  -7  10   3 5.54652 9.11843   8
  -7 -10   3 21.7405 8.34184   9
  -7  10   2 53.6797 11.2791   8
  -7 -10   2 40.4870 9.51241   9
  -7  10   1 138.063 13.7379   8
  -7 -10   1 120.581 11.8278   9
  -7 -10   0 209.492 14.5167   9
  -7  10   0 202.369 16.1589   8
  -7 -10  -1 455.630 21.1311   9
  -7  10  -1 450.825 22.2138   8
  -7  10  -2 73.0744 10.9040   8
  -7 -10  -2 72.5769 10.3975   9
  -7  10  -3 53.0125 8.54822   8
  -7 -10  -3 59.6485 8.59477   9
  -7  10  -4 18.5413 5.54811   8
  -7 -10  -4 21.2785 6.49362   9
  -7 -10  -5 133.994 8.04834   9
  -7  11  10 14.9856 5.88929  12
  -7  11   9 120.329 9.64837  12
  -7  11   8 62.5909 8.86280  12
  -7  11   7 57.3229 9.27525  12
  -7  11   6 588.915 24.7198  12
  -7 -11   6 583.107 22.9341   9
  -7  11   5 164.298 12.9934  12
  -7 -11   5 137.318 10.7538   9
  -7  11   4 571.732 24.1311  12
  -7 -11   4 528.506 22.4648   9
  -7  11   4 521.756 22.6343   8
  -7  11   3 44.2410 9.92931   8
  -7 -11   3 45.0393 8.77527   9
  -7  11   2 97.8165 12.2327   8
  -7 -11   2 87.5348 10.3980   9
  -7  11   1 23.8737 10.5773   8
  -7 -11   1 12.3989 8.20234   9
  -7  11   0 77.6057 11.7727   8
  -7 -11   0 54.4336 9.57147   9
  -7 -11  -1 176.434 12.5380   9
  -7  11  -1 154.665 13.6060   8
  -7 -11  -2 331.095 16.3609   9
  -7  11  -2 320.053 16.8631   8
  -7  11  -3 33.5363 7.35657   8
  -7 -11  -3 49.2029 7.68009   9
  -7  11  -4 42.2318 5.49211   8
  -7 -11  -4 53.5186 6.52897   9
  -7  12   9 73.8754 7.57466  12
  -7  12   8 44.9208 7.64070  12
  -7  12   7 21.5648 7.85880  12
  -7  12   6 454.585 19.3071  12
  -7 -12   6 375.861 17.2753   9
  -7  12   5 667.327 24.8545  12
  -7 -12   5 531.148 22.6053   9
  -7  12   4 201.026 13.5333  12
  -7 -12   4 152.555 11.8204   9
  -7  12   3 8.97514 8.09467   8
  -7 -12   3 17.4073 8.37544   9
  -7  12   2 103.625 11.5034   8
  -7 -12   2 114.109 10.8453   9
  -7  12   1 29.4508 9.65302   8
  -7 -12   1 14.5255 8.05032   9
  -7  12   0 26.1785 9.35431   8
  -7 -12   0 10.2473 7.75657   9
  -7 -12  -1 190.289 12.5607   9
  -7  12  -1 219.767 13.9921   8
  -7 -12  -2 327.658 15.3956   9
  -7  12  -2 315.234 15.9383   8
  -7  12  -3 82.5596 7.85566   8
  -7 -12  -3 77.8214 7.75228   9
  -7 -12  -4 45.9207 5.45407   9
  -7  13   8 56.5953 6.79674  12
  -7  13   7 149.808 10.3906  12
  -7  13   6 110.521 9.69095  12
  -7 -13   6 78.4214 8.15739   9
  -7 -13   5 12.2638 6.77820   9
  -7 -13   4 28.9645 7.64966   9
  -7  13   3 39.9606 8.22536   8
  -7 -13   3 49.2252 8.38333   9
  -7  13   2 115.058 10.8395   8
  -7 -13   2 106.979 10.2386   9
  -7 -13   1 296.828 15.1614   9
  -7  13   1 267.142 15.6206   8
  -7 -13   0 373.275 17.0855   9
  -7  13   0 352.204 17.7285   8
  -7 -13  -1 317.098 15.3555   9
  -7  13  -1 324.592 16.0713   8
  -7  13  -2 71.3501 8.35823   8
  -7 -13  -2 80.6840 8.06234   9
  -7 -13  -3 219.106 10.6673   9
  -7  13  -3 219.603 10.6112   8
  -7 -14   5 941.386 32.1641   9
  -7 -14   4 135.342 10.1427   9
  -7  14   3 28.1643 6.64075   8
  -7 -14   3 36.2171 7.38246   9
  -7  14   2 14.5317 7.40810   8
  -7 -14   2 18.9984 7.20884   9
  -7  14   1 89.6534 9.45453   8
  -7 -14   1 94.5443 9.05259   9
  -7  14   0 42.8804 7.93895   8
  -7 -14   0 41.0471 7.27461   9
  -7 -14  -1 186.524 10.5392   9
  -7  14  -1 171.758 11.2395   8
  -7  14  -2 73.4016 7.38320   8
  -7 -14  -2 87.3692 7.12310   9
  -7 -15   5 474.372 18.5090   9
  -7 -15   4 154.012 10.0239   9
  -7 -15   3 94.8518 8.44851   9
  -7  15   2 36.5576 6.73772   8
  -7 -15   2 47.9791 7.02401   9
  -7 -15   1 188.893 10.3753   9
  -7  15   1 154.199 10.3527   8
  -7  15   0 4.89268 5.96430   8
  -7 -15   0 10.3949 5.57180   9
  -7 -15  -1 152.552 8.67657   9
  -7  15  -1 148.694 9.27298   8
  -7 -16   4 100.578 7.81209   9
  -7 -16   3 84.7068 7.29450   9
  -7  16   2 11.7374 4.81609   8
  -7 -16   2 16.2076 5.44381   9
  -7  16   1 24.1830 5.37876   8
  -7 -16   1 35.5299 5.68537   9
  -7  16   0 23.3120 5.14596   8
  -7 -16   0 24.0060 4.96079   9
  -7 -17   3 264.373 11.2340   9
  -7 -17   2 83.5236 6.13789   9
  -8   0  12-7.46528 6.33229  12
  -8   0  11 58.0448 8.22000  12
  -8   0  10 83.9472 9.92243  12
  -8   0   9-3.97195 8.46729  12
  -8   0   8 5.77857 8.65459  12
  -8   0   7 719.910 29.3122  12
  -8   0   6 82.6268 10.7323  12
  -8   0   6 91.0016 9.52669   8
  -8   0   5 110.221 10.9704   8
  -8   0   5 94.4088 11.0261  12
  -8   0   4-5.98318 9.34953   8
  -8   0   4 11.9871 8.07603  12
  -8   0   3 369.590 19.3031   8
  -8   0   2 213.274 14.9929   8
  -8   0   1 10.6315 9.07313   8
  -8   0   0 276.709 15.9390   8
  -8   0  -1 246.797 14.0650   8
  -8   0  -2 808.270 28.3295   8
  -8   0  -3 56.7581 6.23079   8
  -8   1  12 55.9101 7.34762  12
  -8  -1  12 57.2351 7.15296  12
  -8   1  11 14.8759 7.37831  12
  -8  -1  11 30.3265 7.26586  12
  -8  -1  10 127.372 10.9760  12
  -8   1  10 122.470 11.1328  12
  -8   1   9 84.8981 10.8032  12
  -8  -1   9 63.2168 10.0636  12
  -8   1   8 156.515 13.2941  12
  -8  -1   8 160.070 13.0343  12
  -8  -1   7 10.0548 8.58147  12
  -8   1   7 5.02649 8.96583  12
  -8   1   6 24.9246 7.71787   8
  -8  -1   6 11.0376 8.54613  12
  -8   1   6 15.7232 9.15577  12
  -8  -1   5 10.9547 7.98861   8
  -8   1   5 5.60464 8.10374   8
  -8   1   5 9.90295 8.53451  12
  -8  -1   4 46.3723 9.90920   8
  -8   1   4 35.9813 9.91363   8
  -8   1   4 55.6315 9.79616  12
  -8   1   3 394.040 18.6018  12
  -8  -1   3 342.624 18.8896   8
  -8   1   3 384.413 19.1714   8
  -8  -1   2 109.246 11.9277   8
  -8   1   2 131.963 12.6248   8
  -8  -1   1 1.19473 9.46888   8
  -8   1   1 9.16269 9.13610   8
  -8  -1   0 27.5903 9.13042   8
  -8   1   0 57.0736 10.1523   8
  -8  -1  -1-4.65953 7.77136   8
  -8   1  -1 7.08365 7.93191   8
  -8  -1  -2 202.656 11.5532   8
  -8   1  -2 212.826 11.9713   8
  -8   1  -3 307.960 12.9789   8
  -8   2  12 80.1063 7.96610  12
  -8   2  11 86.8110 9.28463  12
  -8  -2  11 80.2857 8.52952  12
  -8   2  10-16.9826 8.62281  12
  -8  -2  10 8.74861 7.10042  12
  -8   2   9 202.793 14.2158  12
  -8  -2   9 169.052 12.7095  12
  -8  -2   8 150.369 12.1796  12
  -8   2   8 132.800 12.9457  12
  -8   2   7 16.0178 9.58635  12
  -8   2   6 231.235 15.8427  12
  -8   2   6 246.882 14.0459   8
  -8   2   5-12.4011 8.52637   8
  -8   2   5 1.15110 8.75511  12
  -8  -2   5 5.85252 8.28418   8
  -8   2   4 233.767 14.9917  12
  -8  -2   4 225.474 14.6697   8
  -8   2   4 240.984 14.9290   8
  -8   2   3 419.961 19.8997  12
  -8  -2   3 419.284 20.2789   8
  -8   2   3 406.391 20.4398   8
  -8  -2   2 247.868 15.8911   8
  -8   2   2 301.188 16.9553   8
  -8  -2   1 14.1735 9.25561   8
  -8   2   1 43.3004 10.3644   8
  -8  -2   0 13.8767 8.46317   8
  -8   2   0 22.6927 9.23949   8
  -8  -2  -1 336.632 16.0816   8
  -8   2  -1 346.995 16.8913   8
  -8   2  -2 62.1132 8.18975   8
  -8  -2  -2 71.2726 7.61716   8
  -8   2  -3 35.2142 6.01040   8
  -8   3  12 2.67225 6.00730  12
  -8   3  11-14.7521 7.64893  12
  -8  -3  11-26.3064 6.97057  12
  -8   3  10 32.0730 8.60798  12
  -8  -3  10 18.5983 7.27593  12
  -8   3   9 135.153 12.3010  12
  -8   3   8 356.247 19.2355  12
  -8   3   7 63.6286 10.9011  12
  -8   3   6 17.9436 9.33063  12
  -8  -3   6 27.6508 8.78949   8
  -8   3   5 178.757 13.7666  12
  -8  -3   5 199.643 13.5087   8
  -8   3   5 184.694 12.6829   8
  -8   3   4 311.597 17.5990  12
  -8  -3   4 341.653 17.7821   8
  -8   3   4 347.169 17.7689   8
  -8  -3   3 73.9637 11.4656   8
  -8   3   3 80.5838 11.1937   8
  -8  -3   2 119.780 12.0197   8
  -8   3   2 100.936 12.2527   8
  -8  -3   1 52.1737 10.1434   8
  -8   3   1 57.1429 10.6547   8
  -8  -3   0 13.9836 8.21118   8
  -8   3   0 14.0037 9.50268   8
  -8  -3  -1 121.000 10.2098   8
  -8   3  -1 137.181 11.3891   8
  -8  -3  -2 341.942 14.8854   8
  -8   3  -2 370.917 16.0296   8
  -8   3  -3 38.6657 5.95648   8
  -8   4  12 27.0097 5.93015  12
  -8   4  11 12.5066 7.00788  12
  -8   4  10-16.1700 8.28613  12
  -8   4   9-16.0406 9.53834  12
  -8   4   8 320.041 17.9669  12
  -8   4   7 242.114 16.1233  12
  -8   4   6 133.113 12.9038  12
  -8   4   5 50.3177 8.79298   8
  -8   4   5 56.0894 10.3053  12
  -8  -4   5 78.3383 10.2822   8
  -8   4   4 223.544 15.0358  12
  -8  -4   4 214.572 14.5229   8
  -8   4   4 209.766 13.9723   8
  -8   4   3 202.497 14.0719  12
  -8  -4   3 175.688 13.4763   8
  -8   4   3 175.481 13.8230   8
  -8  -4   2 258.840 15.6355   8
  -8   4   2 237.504 15.8571   8
  -8  -4   1 159.950 12.6743   8
  -8   4   1 166.993 13.5421   8
  -8  -4   0 314.228 15.5503   8
  -8   4   0 275.019 16.6487   8
  -8  -4  -1 308.145 14.8294   8
  -8   4  -1 304.487 16.0509   8
  -8  -4  -2 128.020 8.75285   8
  -8   4  -2 113.027 9.42818   8
  -8   4  -3 104.796 7.58282   8
  -8   5  11 122.412 9.66470  12
  -8   5  10 159.942 11.8574  12
  -8   5   9 244.811 14.9135  12
  -8   5   8 394.753 19.7266  12
  -8   5   7 30.3258 9.17708  12
  -8   5   6 221.661 14.9021  12
  -8   5   5 22.8210 7.48956   8
  -8   5   5 24.5744 9.21005  12
  -8   5   4 415.483 20.6640  12
  -8  -5   4 483.250 20.6568   8
  -8   5   4 424.225 20.5348   8
  -8   5   3 217.373 14.6996  12
  -8   5   3 185.569 14.2241   8
  -8  -5   2 544.002 23.2716   8
  -8   5   2 539.525 24.3796   8
  -8  -5   1 665.483 26.0892   8
  -8   5   1 665.100 27.4241   8
  -8  -5   0 403.189 18.1672   8
  -8   5   0 412.275 19.9785   8
  -8   5  -1 3.82705 7.94374   8
  -8  -5  -1 31.5458 7.27740   8
  -8   5  -2 334.182 15.3403   8
  -8   5  -3 174.589 9.13366   8
  -8   6  11 28.2741 6.46892  12
  -8   6  10-2.76361 7.11084  12
  -8   6   9 121.448 11.0012  12
  -8   6   8 64.4835 10.3472  12
  -8   6   7 35.6153 9.02825  12
  -8   6   6 23.2803 9.11968  12
  -8   6   5 114.816 11.8026  12
  -8   6   5 104.663 9.67412   8
  -8   6   4 405.932 19.7911  12
  -8   6   4 375.857 18.5113   8
  -8   6   3 53.6228 10.4536  12
  -8  -6   3 32.1976 10.2160   8
  -8   6   2 2.57088 9.31704   8
  -8  -6   2 50.8633 9.95330   8
  -8   6   1 39.0967 10.3861   8
  -8  -6   1 65.6199 9.33176   8
  -8   6   0 0.95559 9.07153   8
  -8   6  -1 63.3408 9.38188   8
  -8   6  -2 274.512 13.3107   8
  -8   6  -3 80.9383 6.42710   8
  -8   7  11-0.92414 5.36827  12
  -8   7  10-6.72071 7.00606  12
  -8   7   9 166.888 11.7572  12
  -8   7   8 294.884 15.9024  12
  -8   7   7 108.304 11.1472  12
  -8   7   6 149.790 12.2869  12
  -8   7   5 66.1640 8.27636   8
  -8   7   5 68.3841 10.3216  12
  -8   7   4-1.89308 7.55752   8
  -8   7   4 35.6688 9.51849  12
  -8   7   3 53.5113 9.90993   8
  -8   7   2 89.1199 11.0962   8
  -8   7   1 10.3251 9.23690   8
  -8   7   0 62.5979 10.1631   8
  -8  -7  -1 167.488 10.2852   9
  -8   7  -1 187.636 12.2876   8
  -8   7  -2 20.3602 6.54040   8
  -8  -7  -2 19.2865 5.62965   9
  -8   7  -3 14.7862 4.60208   8
  -8   8  10 80.0785 7.68820  12
  -8   8   9 107.953 9.58637  12
  -8   8   8 692.553 26.5607  12
  -8   8   7 297.624 15.8854  12
  -8   8   6 237.169 14.6048  12
  -8   8   5 157.583 12.3966  12
  -8   8   4 145.883 12.1551  12
  -8   8   4 113.894 10.4841   8
  -8   8   3 10.7413 8.43254   8
  -8   8   2 72.0737 10.1564   8
  -8   8   1 446.392 20.4328   8
  -8   8   0 67.2066 9.64385   8
  -8  -8   0 64.6256 7.78831   9
  -8   8  -1 36.4181 7.91237   8
  -8  -8  -1 35.3057 6.47211   9
  -8   8  -2 47.2780 6.65964   8
  -8  -8  -2 44.1532 6.21238   9
  -8   9  10 113.127 7.92533  12
  -8   9   9 145.293 9.85773  12
  -8   9   8 65.8254 8.56071  12
  -8   9   7 75.7915 9.38698  12
  -8   9   6 43.6665 9.00072  12
  -8   9   5 61.8500 9.69730  12
  -8   9   4 22.2541 7.16743   8
  -8   9   3 26.3114 8.18521   8
  -8   9   2 74.2484 9.77444   8
  -8   9   1 70.7516 9.81425   8
  -8  -9   1 72.0723 8.11781   9
  -8  -9   0 239.547 12.1341   9
  -8   9   0 234.607 13.6506   8
  -8  -9  -1 124.875 8.74452   9
  -8   9  -1 145.733 10.1637   8
  -8   9  -2 4.75179 5.33252   8
  -8  -9  -2-3.12560 4.67908   9
  -8  10   9 42.6805 6.33184  12
  -8  10   8 83.7313 8.31772  12
  -8  10   7 653.458 24.5380  12
  -8  10   6 252.004 13.8584  12
  -8  10   5 217.422 13.4665  12
  -8  10   4 125.690 9.30762   8
  -8  10   3 75.6863 8.84639   8
  -8 -10   2 160.255 9.94750   9
  -8  10   2 161.156 11.4063   8
  -8  10   1 103.415 9.77424   8
  -8 -10   1 123.536 8.86189   9
  -8 -10   0 216.511 11.1356   9
  -8  10   0 211.772 12.4166   8
  -8 -10  -1 217.363 10.8492   9
  -8  10  -1 235.631 11.8936   8
  -8  10  -2 4.88387 4.49210   8
  -8  11   8 223.513 11.2364  12
  -8  11   7 141.321 9.79570  12
  -8  11   3 12.8277 6.35364   8
  -8 -11   3 22.4231 5.80594   9
  -8  11   2 10.1042 6.65548   8
  -8 -11   2 19.1874 5.97259   9
  -8  11   1 3.73042 6.51440   8
  -8 -11   1-0.24963 5.57753   9
  -8  11   0 26.4069 6.62576   8
  -8 -11   0 48.7595 6.10521   9
  -8  11  -1 79.5841 7.06144   8
  -8 -12   4 22.2277 5.11803   9
  -8 -12   3 156.147 8.68059   9
  -8  12   3 131.729 8.70218   8
  -8 -12   2 167.872 9.28510   9
  -8  12   2 165.042 9.90646   8
  -8  12   1 12.9994 5.80252   8
  -8 -12   1 19.5173 5.30627   9
  -8  12   0 49.7482 6.28875   8
  -8 -13   3 43.6726 5.46897   9
  -8 -13   2 89.1624 6.48932   9
  -8  13   2 78.2880 6.40096   8
  -8  13   1 31.1193 5.13208   8
  -9   0   9 136.705 8.97238  12
  -9   0   8 58.1566 7.40311  12
  -9   0   6 415.230 16.6476   8
  -9   0   5 54.1820 7.83894   8
  -9   0   4 13.1433 7.32591   8
  -9   0   3 4.63192 7.29814   8
  -9   0   2 22.3255 7.50734   8
  -9   0   1-2.36658 6.47269   8
  -9   0   0 15.6232 5.76351   8
  -9   1   9 50.6968 6.89636  12
  -9   1   8 205.835 11.2698  12
  -9   1   7 69.5574 8.08856  12
  -9   1   6 34.9059 7.32482  12
  -9   1   6 18.5158 5.71691   8
  -9  -1   5 14.2232 7.00327   8
  -9   1   5 10.6144 6.54819   8
  -9  -1   4 24.5937 7.48701   8
  -9   1   4 15.3717 7.24735   8
  -9   1   3 22.6861 7.63765   8
  -9  -1   3 45.1476 8.50278   8
  -9  -1   2 170.927 10.8220   8
  -9   1   2 147.322 10.5056   8
  -9   1   1 61.6596 7.80662   8
  -9  -1   1 67.6292 7.94299   8
  -9   1   0 50.5688 6.62591   8
  -9  -1   0 52.7786 6.50087   8
  -9   2   9 62.6841 7.10435  12
  -9   2   8 61.6773 7.71215  12
  -9   2   7 26.6315 7.07663  12
  -9   2   6 58.2934 7.86003  12
  -9   2   6 49.0944 6.57310   8
  -9  -2   5 145.833 10.0262   8
  -9   2   5 119.959 9.17337   8
  -9  -2   4 142.227 10.3545   8
  -9   2   4 114.160 9.58433   8
  -9  -2   3 322.263 14.8234   8
  -9   2   3 275.636 14.3422   8
  -9   2   2 84.6128 8.99081   8
  -9  -2   2 117.923 9.42868   8
  -9  -2   1 138.032 9.41916   8
  -9   2   1 117.974 9.39833   8
  -9  -2   0 186.573 9.82008   8
  -9   2   0 171.320 9.85480   8
  -9   3   9 187.273 10.3890  12
  -9   3   8 161.701 10.3305  12
  -9   3   7 142.189 9.89858  12
  -9   3   6 219.963 12.1452  12
  -9   3   5 41.1490 6.82821   8
  -9   3   4 64.6039 8.20738   8
  -9  -3   4 115.488 9.42851   8
  -9  -3   3 181.125 11.1759   8
  -9   3   3 134.854 10.3721   8
  -9   3   2 45.3428 7.95626   8
  -9  -3   2 69.4195 8.45648   8
  -9   3   1 3.11589 6.63081   8
  -9  -3   1 27.6054 6.77707   8
  -9   3   0 86.9965 7.56688   8
  -9   4   9 70.8078 7.16710  12
  -9   4   8 147.269 9.84460  12
  -9   4   7 52.9427 7.68727  12
  -9   4   6 89.3045 8.92703  12
  -9   4   5 3.80531 5.51912   8
  -9   4   4 135.517 9.63394   8
  -9   4   3-5.71171 6.99574   8
  -9   4   2 138.546 9.93521   8
  -9   4   1 180.360 10.6127   8
  -9   4   0 126.393 8.31735   8
  -9   5   9 142.424 8.78824  12
  -9   5   8 92.4909 8.10971  12
  -9   5   7 142.248 9.69511  12
  -9   5   6 37.3523 7.62399  12
  -9   5   5 37.5715 6.09284   8
  -9   5   4 20.4690 6.16976   8
  -9   5   3 159.625 10.1919   8
  -9   5   2-8.73592 6.66630   8
  -9   5   1 207.002 11.0374   8
  -9   5   0 94.5006 7.26089   8
  -9   6   8 305.147 13.4528  12
  -9   6   7 97.4405 8.45221  12
  -9   6   5 2.85773 4.89395   8
  -9   6   4 14.2589 5.70778   8
  -9   6   3 3.35402 6.11220   8
  -9   6   2 12.1635 5.92631   8
  -9   6   1 9.20555 5.64798   8
  -9   6   0-3.94751 4.95489   8
  -9   7   8 106.610 7.78667  12
  -9   7   7 184.328 10.4748  12
  -9   7   4 278.183 12.1046   8
  -9   7   3 83.6926 7.48993   8
  -9   7   2 26.6290 5.95228   8
  -9   7   1 48.8453 6.10502   8
  -9   8   3 45.2731 5.74108   8
  -9   8   2 48.1544 5.80020   8
   0   0   0    0.00    0.00   0
TITL cyc151228 in P2(1)/m
REM P2(1)/m (#11 in standard setting)
CELL 1.54184   7.924671  20.082772  12.831840  90.0000 107.6249  90.0000
ZERR   73.00   0.000150   0.000268   0.000267   0.0000   0.0024   0.0000
LATT  1
SYMM -x, y+1/2,-z
SFAC C H N O
UNIT 73.00 73.00 73.00 73.00
TREF
HKLF 4
END
;
_shelx_hkl_checksum               29975
_shelx_SHELXL_version_number      '2014/7'
_olex2_date_sample_data_collection 2015-12-28
_olex2_submission_special_instructions 'No special instructions were received'
