# Supplementary material for: Switchable regioselectivity in amine-catalysed asymmetric cycloadditions
Source: Springer Nature journal article supplement (doi:10.1038/nchem.2698), 2017-01-16
Supplement: 41557_2017_BFnchem2698_MOESM375_ESM.mol [file 41557_2017_BFnchem2698_MOESM375_ESM.mol]

nchem.2698-comp9b.mol
  ChemDraw12161611482D

 33 37  0  0  1  0  0  0  0  0999 V2000
   -1.6890    0.4115    0.0000 C   0  0  0  0  0  0  0  0  0  0  0  0
   -0.8648    0.4115    0.0000 C   0  0  0  0  0  0  0  0  0  0  0  0
   -1.9437   -0.3724    0.0000 C   0  0  0  0  0  0  0  0  0  0  0  0
   -1.2769   -0.8569    0.0000 N   0  0  0  0  0  0  0  0  0  0  0  0
   -0.6101   -0.3724    0.0000 C   0  0  0  0  0  0  0  0  0  0  0  0
    0.1744   -0.6273    0.0000 O   0  0  0  0  0  0  0  0  0  0  0  0
   -2.7283   -0.6273    0.0000 O   0  0  0  0  0  0  0  0  0  0  0  0
   -0.8648    1.2357    0.0000 C   0  0  0  0  0  0  0  0  0  0  0  0
   -1.6890    1.2357    0.0000 C   0  0  0  0  0  0  0  0  0  0  0  0
   -0.6101    2.0196    0.0000 C   0  0  0  0  0  0  0  0  0  0  0  0
   -1.2769    2.5040    0.0000 C   0  0  0  0  0  0  0  0  0  0  0  0
   -1.9437    2.0196    0.0000 C   0  0  0  0  0  0  0  0  0  0  0  0
   -2.5168    1.2357    0.0000 H   0  0  0  0  0  0  0  0  0  0  0  0
   -0.0370    1.2357    0.0000 H   0  0  0  0  0  0  0  0  0  0  0  0
   -2.5168    0.4115    0.0000 H   0  0  0  0  0  0  0  0  0  0  0  0
   -0.0370    0.4115    0.0000 H   0  0  0  0  0  0  0  0  0  0  0  0
   -1.2769    3.3318    0.0000 O   0  0  0  0  0  0  0  0  0  0  0  0
    0.1771    2.2754    0.0000 C   0  0  0  0  0  0  0  0  0  0  0  0
    0.7923    1.7215    0.0000 C   0  0  0  0  0  0  0  0  0  0  0  0
    0.6202    0.9118    0.0000 C   0  0  0  0  0  0  0  0  0  0  0  0
    1.2354    0.3579    0.0000 C   0  0  0  0  0  0  0  0  0  0  0  0
    2.0226    0.6137    0.0000 C   0  0  0  0  0  0  0  0  0  0  0  0
    2.1947    1.4234    0.0000 C   0  0  0  0  0  0  0  0  0  0  0  0
    1.5796    1.9773    0.0000 C   0  0  0  0  0  0  0  0  0  0  0  0
   -1.9914   -2.0943    0.0000 C   0  0  0  0  0  0  0  0  0  0  0  0
   -2.7059   -1.6818    0.0000 C   0  0  0  0  0  0  0  0  0  0  0  0
   -3.4203   -2.0943    0.0000 C   0  0  0  0  0  0  0  0  0  0  0  0
   -3.4203   -2.9193    0.0000 C   0  0  0  0  0  0  0  0  0  0  0  0
   -2.7059   -3.3318    0.0000 C   0  0  0  0  0  0  0  0  0  0  0  0
   -1.9914   -2.9193    0.0000 C   0  0  0  0  0  0  0  0  0  0  0  0
   -1.2769   -1.6818    0.0000 C   0  0  0  0  0  0  0  0  0  0  0  0
    2.6357    0.0616    0.0000 O   0  0  0  0  0  0  0  0  0  0  0  0
    3.4203    0.3166    0.0000 C   0  0  0  0  0  0  0  0  0  0  0  0
 25 26  2  0      
 26 27  1  0      
 27 28  2  0      
 28 29  1  0      
 29 30  2  0      
 25 30  1  0      
 25 31  1  0      
  4 31  1  0      
 22 32  1  0      
 32 33  1  0      
  1  2  1  0      
  1  3  1  0      
  3  4  1  0      
  4  5  1  0      
  5  2  1  0      
  5  6  2  0      
  3  7  2  0      
  2  8  1  0      
  8  9  1  0      
  9  1  1  0      
  8 10  1  0      
 10 11  1  0      
 11 12  1  0      
 12  9  1  0      
  9 13  1  1      
  8 14  1  1      
  1 15  1  6      
  2 16  1  6      
 11 17  2  0      
 10 18  2  0      
 18 19  1  0      
 19 20  2  0      
 20 21  1  0      
 21 22  2  0      
 22 23  1  0      
 23 24  2  0      
 24 19  1  0      
M  STY  1   1 SUP
M  SLB  1   1   1
M  SAL   1  7  25  26  27  28  29  30  31
M  SBL   1  1   8
M  SMT   1 Bn
M  SBV   1   8    0.0000    0.8249
M  STY  1   2 SUP
M  SLB  1   2   2
M  SAL   2  2  32  33
M  SBL   2  1   9
M  SMT   2 OMe
M  SBV   2   9   -0.6131    0.5520
M  END
